# Supplementary material for: Tumor-agnostic transcriptome-based classifier identifies spatial infiltration patterns of CD8+T cells in the tumor microenvironment and predicts clinical outcome in early-phase and late-phase clinical trials
Source: PubMed Central journal article supplement — J Immunother Cancer. 2024 Apr 22;12(4):e008185. doi: 10.1136/jitc-2023-008185 (PMC11043740; doi:10.1136/jitc-2023-008185), 2024-04-22
Supplement: jitc-2023-008185supp001.pdf [file jitc-2023-008185supp001.pdf]

**Supplementary tables from Roller, et al. "Tumor-agnostic transcriptome-based classifier identifies spatial infiltration patterns of CD8+ T cells in the tumor microenvironment and predicts clinical outcome in early- and late-phase clinical trials"**

**Table S1** List of phase I/II clinical trials from which tissue samples were sourced.

| NCT number         | Phase | Full trial name                                                                                                                           | Tumor type(s) | Drug(s)                       | No of samples used in this analysis |
|--------------------|-------|-------------------------------------------------------------------------------------------------------------------------------------------|---------------|-------------------------------|-------------------------------------|
| <b>NCT02004106</b> | I     | A Study to Evaluate Safety, Pharmacokinetics, and Efficacy of RO6895882 in Participants With Advanced and/or Metastatic Solid Tumors      | Neoplasms     | RO6895882                     | 64                                  |
| <b>NCT02304393</b> | I     | A Study of Selicrelumab (RO7009789) in Combination With Atezolizumab in Participants With Locally Advanced and/or Metastatic Solid Tumors | Solid tumors  | Atezolizumab;<br>Selicrelumab | 91                                  |
| <b>NCT02323191</b> | I     | A Study of Emactuzumab and Atezolizumab Administered in Combination in Participants With Advanced Solid Tumors                            | Solid cancers | Atezolizumab;<br>Emactuzumab  | 138                                 |

|                    |   |                                                                                                                                                                                                              |                                                       |                                              |    |
|--------------------|---|--------------------------------------------------------------------------------------------------------------------------------------------------------------------------------------------------------------|-------------------------------------------------------|----------------------------------------------|----|
| <b>NCT02350673</b> | I | A Study of Intravenous (IV) Cergutuzumab Amunaleukin and Atezolizumab in Combination in Participants With Locally Advanced and/or Metastatic Solid Tumors                                                    | Solid tumors                                          | Atezolizumab;<br>Cergutuzumab<br>Amunaleukin | 36 |
| <b>NCT02627274</b> | I | A Study Evaluating Safety, Pharmacokinetics, and Therapeutic Activity of RO6874281 as a Single Agent (Part A) or in Combination With Trastuzumab or Cetuximab (Part B or C)                                  | Solid tumors;<br>Breast cancer;<br>Head & Neck cancer | RO6874281;<br>Trastuzumab;<br>Cetuximab      | 57 |
| <b>NCT02665416</b> | I | Study Evaluating the Safety, Pharmacokinetics (PK), Pharmacodynamics (PD), and Therapeutic Activity of Selicrelumab (RO7009789) With Vanucizumab or Bevacizumab in Participants With Metastatic Solid Tumors | Advanced/metastatic<br>solid tumors                   | Selicrelumab;<br>Vanucizumab;<br>Bevacizumab | 52 |
| <b>NCT03063762</b> | I | Study to Evaluate Safety, Pharmacokinetics and Therapeutic Activity of RO6874281 as a Combination Therapy in Participants With Unresectable Advanced and/or Metastatic Renal Cell Carcinoma (RCC)            | Renal cell carcinoma                                  | Atezolizumab;<br>Bevacizumab;<br>RO6874281   | 46 |

|                    |    |                                                                                                                                                                                                     |                                                                            |                                                              |    |
|--------------------|----|-----------------------------------------------------------------------------------------------------------------------------------------------------------------------------------------------------|----------------------------------------------------------------------------|--------------------------------------------------------------|----|
| <b>NCT03539484</b> | I  | A Study of RO7172508 in Patients With Locally Advanced and/or Metastatic CEA-Positive Solid Tumors                                                                                                  | Solid tumors                                                               | RO7172508;<br>Obinutuzumab;<br>Tocilizumab                   | 16 |
| <b>NCT03292172</b> | I  | A Study to Evaluate the Safety, Pharmacokinetics and Clinical Activity of RO6870810 and Atezolizumab (PD-L1 Antibody) in Participants With Advanced Ovarian Cancer or Triple Negative Breast Cancer | Advanced ovarian cancer; Triple negative breast cancer                     | Atezolizumab;<br>RO6870810                                   | 17 |
| <b>NCT03386721</b> | II | Basket Study to Evaluate the Therapeutic Activity of Simlukafusp Alfa as a Combination Therapy in Participants With Advanced and/or Metastatic Solid Tumors                                         | Advanced/<br>metastatic Head &<br>Neck, cervical and<br>esophageal cancers | Simlukafusp;<br>Atezolizumab;<br>Gemcitabine;<br>Vinorelbine | 90 |
| <b>NCT02031458</b> | II | A Study of Atezolizumab in Participants With Programmed Death - Ligand 1 (PD-L1) Positive Locally Advanced or Metastatic Non-Small Cell Lung Cancer (BIRCH)                                         | NSCLC                                                                      | Atezolizumab                                                 | 21 |

Further information on these trials can be found at [clinicaltrials.gov](https://clinicaltrials.gov). NSCLC, non-small-cell lung cancer

**Table S2** List of principal investigator's ethics approval board/committee for each study.

| Study name               | Phase | Study PI's ethics approval board/committee                     | City and Country              |
|--------------------------|-------|----------------------------------------------------------------|-------------------------------|
| NCT02004106              | I     | Comité Etico de Investigación Clínica (CEIC) de Navarra        | Pamplona, Spain               |
| NCT02304393              | I     | CEIC Hospital Vall D'Hebron                                    | Barcelona, Spain              |
| NCT02323191              | I     | Dana-Farber Cancer Institute Institutional Review Board        | Boston, MA, United States     |
| NCT02350673              | I     | Comité Etico de Investigación Clínica (CEIC) de Navarra        | Pamplona, Spain               |
| NCT02627274              | I     | Comité Etico de Investigación Clínica (CEIC) de Navarra        | Pamplona, Spain               |
| NCT02665416              | I     | University Health Network Research Ethics Board                | Toronto, Canada               |
| NCT03063762              | I     | CEIC Hospital Vall D'Hebron                                    | Barcelona, Spain              |
| NCT03539484              | I     | University Health Network Research Ethics Board                | Toronto, Canada               |
| NCT03292172              | I     | Dana Farber Cancer Institute/Dana-Farber/Harvard Cancer center | Boston, MA, United States     |
| NCT03386721              | II    | CEIC Parc de Salut Mar; IMIM- Hospital del Mar                 | Barcelona, Spain              |
| NCT02031458              | II    | MD Anderson Cancer Center Office of Protocol Research          | Houston, TX, United States    |
| NCT02108652 (IMvigor210) | II    | Memorial Sloan Kettering IRB                                   | New York, NY, United States   |
| NCT02302807 (IMvigor211) | III   | NRES Committee London - West London and GTAC                   | Nottingham, United Kingdom    |
| NCT02008227 (OAK)        | III   | UC Davis IRB                                                   | Sacramento, CA, United States |

Table S3 List of differentially expressed genes.

Tab 1: INFLAMED\_DESERT

| PARAM   | logFC       | pval        | pval.adj    | UPDOWN | desc                                                                                                                    | chr   | start     | end       | size |
|---------|-------------|-------------|-------------|--------|-------------------------------------------------------------------------------------------------------------------------|-------|-----------|-----------|------|
| CD8A    | 2.385972464 | 2.0281E-169 | 3.6771E-165 | UP     | CD8a molecule [Source:HGNC Symbol;Acc:HGNC:1706]                                                                        | chr2  | 86784610  | 86808396  | 3634 |
| GBP5    | 2.551165734 | 1.3719E-167 | 1.2437E-163 | UP     | guanylate binding protein 5 [Source:HGNC Symbol;Acc:HGNC:19895]                                                         | chr1  | 89260582  | 89270863  | 2011 |
| STAT1   | 1.338448185 | 1.2807E-152 | 7.7402E-149 | UP     | signal transducer and activator of transcription 1 [Source:HGNC Symbol;Acc:HGNC:11362]                                  | chr2  | 190969034 | 191014250 | 4945 |
| IFNG    | 2.951635517 | 1.9531E-149 | 8.8528E-146 | UP     | interferon gamma [Source:HGNC Symbol;Acc:HGNC:5438]                                                                     | chr12 | 68154768  | 68159747  | 1218 |
| CXCL9   | 3.503871145 | 3.9861E-147 | 1.4454E-143 | UP     | C-X-C motif chemokine ligand 9 [Source:HGNC Symbol;Acc:HGNC:7098]                                                       | chr4  | 76001275  | 76007488  | 2740 |
| CXCR6   | 2.126520536 | 6.2045E-147 | 1.8749E-143 | UP     | C-X-C motif chemokine receptor 6 [Source:HGNC Symbol;Acc:HGNC:16647]                                                    | chr3  | 45940933  | 45948353  | 3769 |
| CCL5    | 2.209650578 | 1.1885E-146 | 3.0783E-143 | UP     | C-C motif chemokine ligand 5 [Source:HGNC Symbol;Acc:HGNC:10632]                                                        | chr17 | 35871491  | 35880793  | 1430 |
| ITGAE   | 1.304077561 | 1.4224E-146 | 3.2237E-143 | UP     | integrin subunit alpha E [Source:HGNC Symbol;Acc:HGNC:6147]                                                             | chr17 | 3714628   | 3801243   | 3858 |
| GBP4    | 1.776389771 | 2.1784E-145 | 4.3886E-142 | UP     | guanylate binding protein 4 [Source:HGNC Symbol;Acc:HGNC:20480]                                                         | chr1  | 89181148  | 89198932  | 6127 |
| PSMB9   | 1.705714918 | 4.7851E-145 | 8.676E-142  | UP     | proteasome subunit beta 9 [Source:HGNC Symbol;Acc:HGNC:9546]                                                            | chr6  | 32844136  | 32859585  | 921  |
| GBP1    | 1.717018256 | 2.1978E-144 | 2.1391E-141 | UP     | guanylate binding protein 1 [Source:HGNC Symbol;Acc:HGNC:4182]                                                          | chr1  | 89052319  | 89065360  | 3035 |
| CXCL10  | 3.052295322 | 2.1903E-143 | 3.3093E-140 | UP     | C-X-C motif chemokine ligand 10 [Source:HGNC Symbol;Acc:HGNC:10637]                                                     | chr4  | 76021117  | 76023497  | 1176 |
| GZMA    | 2.305907552 | 1.2841E-142 | 1.791E-139  | UP     | granzyme A [Source:HGNC Symbol;Acc:HGNC:4708]                                                                           | chr5  | 55102648  | 55110252  | 894  |
| IRF1    | 1.300093807 | 2.6953E-142 | 3.4906E-139 | UP     | interferon regulatory factor 1 [Source:HGNC Symbol;Acc:HGNC:6116]                                                       | chr5  | 132481609 | 132490798 | 3792 |
| TAP1    | 1.576888128 | 2.4807E-138 | 2.9984E-135 | UP     | transporter 1, ATP binding cassette subfamily B member [Source:HGNC Symbol;Acc:HGNC:43]                                 | chr6  | 32845209  | 32853978  | 2959 |
| LAG3    | 2.018720392 | 2.7645E-137 | 8.7986E-134 | UP     | lymphocyte activating 3 [Source:HGNC Symbol;Acc:HGNC:6476]                                                              | chr12 | 6772519   | 6778453   | 2160 |
| GZMH    | 2.577857155 | 1.7455E-136 | 1.8617E-133 | UP     | granzyme H [Source:HGNC Symbol;Acc:HGNC:4710]                                                                           | chr14 | 24606480  | 24609699  | 951  |
| FASLG   | 2.337768211 | 2.0718E-136 | 2.0869E-133 | UP     | Fas ligand [Source:HGNC Symbol;Acc:HGNC:11936]                                                                          | chr1  | 172659018 | 172666874 | 1888 |
| CD2     | 1.937080752 | 2.9885E-129 | 2.8518E-126 | UP     | CD2 molecule [Source:HGNC Symbol;Acc:HGNC:1639]                                                                         | chr1  | 116754385 | 116769228 | 1679 |
| IL2RB   | 1.766985414 | 4.226E-129  | 3.8311E-126 | UP     | interleukin 2 receptor subunit beta [Source:HGNC Symbol;Acc:HGNC:6009]                                                  | chr22 | 37125838  | 37149990  | 4113 |
| IDO1    | 2.994064425 | 1.1427E-128 | 9.8662E-126 | UP     | indoleamine 2,3-dioxygenase 1 [Source:HGNC Symbol;Acc:HGNC:6059]                                                        | chr8  | 39902375  | 39928431  | 2319 |
| GZMB    | 2.562704232 | 8.8323E-128 | 7.2791E-125 | UP     | granzyme B [Source:HGNC Symbol;Acc:HGNC:4709]                                                                           | chr14 | 24630954  | 24634267  | 1304 |
| WARS    | 1.320790411 | 4.9475E-126 | 3.9001E-123 | UP     | tryptophanyl-tRNA synthetase [Source:HGNC Symbol;Acc:HGNC:12729]                                                        | chr14 | 100333788 | 100376805 | 4245 |
| NGK7    | 2.236831846 | 7.6752E-126 | 5.7983E-123 | UP     | natural killer cell granule protein 7 [Source:HGNC Symbol;Acc:HGNC:7830]                                                | chr19 | 51371606  | 51372715  | 935  |
| CXCL11  | 3.149427666 | 6.6946E-125 | 4.8552E-122 | UP     | C-X-C motif chemokine ligand 11 [Source:HGNC Symbol;Acc:HGNC:10638]                                                     | chr4  | 76033682  | 76041415  | 1908 |
| PRF1    | 2.003101917 | 3.5482E-124 | 2.4743E-121 | UP     | perforin 1 [Source:HGNC Symbol;Acc:HGNC:9360]                                                                           | chr10 | 70597348  | 70602775  | 2534 |
| CCR5    | 1.827377156 | 5.608E-124  | 3.7659E-121 | UP     | C-C motif chemokine receptor 5 (gene/pseudogene) [Source:HGNC Symbol;Acc:HGNC:1606]                                     | chr3  | 46370854  | 46376206  | 3672 |
| CD3E    | 1.944033578 | 7.0552E-124 | 4.5685E-121 | UP     | CD3e molecule [Source:HGNC Symbol;Acc:HGNC:1674]                                                                        | chr11 | 118304545 | 118316175 | 1548 |
| CCL4    | 1.927008471 | 8.8733E-119 | 5.5476E-116 | UP     | C-C motif chemokine ligand 4 [Source:HGNC Symbol;Acc:HGNC:10630]                                                        | chr17 | 36103590  | 36105621  | 904  |
| KIR2DL4 | 2.796063812 | 1.5293E-118 | 9.2428E-116 | UP     | killer cell immunoglobulin like receptor, two Ig domains and long cytoplasmic tail 4 [Source:HGNC Symbol;Acc:HGNC:6332] | chr19 | 54803350  | 54814517  | 1657 |
| CD3G    | 1.970506292 | 1.1618E-116 | 6.7951E-114 | UP     | CD3g molecule [Source:HGNC Symbol;Acc:HGNC:1675]                                                                        | chr11 | 118344344 | 118355161 | 2690 |
| CD3D    | 1.943749835 | 7.1233E-116 | 4.036E-113  | UP     | CD3d molecule [Source:HGNC Symbol;Acc:HGNC:1673]                                                                        | chr11 | 118338954 | 118342744 | 861  |
| TIGIT   | 1.997858666 | 4.7792E-114 | 2.6258E-111 | UP     | T-cell immunoreceptor with Ig and ITIM domains [Source:HGNC Symbol;Acc:HGNC:26838]                                      | chr3  | 114291059 | 114310288 | 5708 |
| PDCD1   | 2.317515773 | 7.6579E-114 | 4.0837E-111 | UP     | programmed cell death 1 [Source:HGNC Symbol;Acc:HGNC:8760]                                                              | chr2  | 241849881 | 241858908 | 2114 |
| KLRK1   | 2.088582766 | 3.4055E-111 | 1.7641E-108 | UP     | killer cell lectin like receptor K1 [Source:HGNC Symbol;Acc:HGNC:18788]                                                 | chr12 | 10372353  | 10390018  | 1654 |
| SLAMF7  | 1.954644383 | 6.242E-110  | 3.1437E-107 | UP     | SLAM family member 7 [Source:HGNC Symbol;Acc:HGNC:21394]                                                                | chr1  | 160739057 | 160754821 | 2936 |
| PYHIN1  | 1.856222689 | 8.7397E-109 | 4.2827E-106 | UP     | pyrin and HIN domain family member 1 [Source:HGNC Symbol;Acc:HGNC:28894]                                                | chr1  | 158931552 | 158977054 | 2937 |
| IL12RB1 | 1.621893829 | 3.1779E-108 | 1.5163E-105 | UP     | interleukin 12 receptor subunit beta 1 [Source:HGNC Symbol;Acc:HGNC:5971]                                               | chr19 | 18058995  | 18098944  | 3744 |
| TRAC    | 1.814660835 | 7.1283E-107 | 3.3139E-104 | UP     | T-cell receptor alpha constant [Source:HGNC Symbol;Acc:HGNC:12029]                                                      | chr14 | 22547506  | 22552154  | 976  |
| CD274   | 1.89890654  | 2.976E-106  | 1.3489E-103 | UP     | CD274 molecule [Source:HGNC Symbol;Acc:HGNC:17635]                                                                      | chr9  | 5450503   | 5470566   | 3685 |
| LAP3    | 0.873760815 | 3.4035E-106 | 1.5051E-103 | UP     | leucine aminopeptidase 3 [Source:HGNC Symbol;Acc:HGNC:18449]                                                            | chr4  | 17577192  | 17607968  | 2213 |
| CD7     | 1.891257263 | 1.2331E-105 | 5.323E-103  | UP     | CD7 molecule [Source:HGNC Symbol;Acc:HGNC:1695]                                                                         | chr17 | 82314868  | 82317602  | 2478 |
| CRTAM   | 2.007144434 | 3.0669E-105 | 1.2932E-102 | UP     | cytotoxic and regulatory T-cell molecule [Source:HGNC Symbol;Acc:HGNC:24313]                                            | chr11 | 122838500 | 122872639 | 2630 |
| SH2D1A  | 2.104625776 | 4.8073E-105 | 1.9809E-102 | UP     | SH2 domain containing 1A [Source:HGNC Symbol;Acc:HGNC:10820]                                                            | chrX  | 124346344 | 124373155 | 2450 |
| CD38    | 2.066786751 | 9.3715E-105 | 3.7759E-102 | UP     | CD38 molecule [Source:HGNC Symbol;Acc:HGNC:1667]                                                                        | chr4  | 15778278  | 15853230  | 5668 |
| TNIP3   | 2.235880252 | 1.055E-104  | 4.1582E-102 | UP     | TNFAIP3 interacting protein 3 [Source:HGNC Symbol;Acc:HGNC:19315]                                                       | chr4  | 121131408 | 121227466 | 2747 |
| ICOS    | 1.979045847 | 3.6639E-104 | 1.4134E-101 | UP     | inducible T-cell costimulator [Source:HGNC Symbol;Acc:HGNC:5351]                                                        | chr2  | 203936748 | 203961577 | 2645 |
| EOMES   | 1.98494899  | 3.2007E-103 | 1.209E-100  | UP     | eomesodermin [Source:HGNC Symbol;Acc:HGNC:3372]                                                                         | chr3  | 27715949  | 27722711  | 3656 |
| THEMIS  | 1.906690629 | 4.1667E-103 | 1.5417E-100 | UP     | thymocyte selection associated [Source:HGNC Symbol;Acc:HGNC:21569]                                                      | chr6  | 127708072 | 127918631 | 4309 |
| SAMD9L  | 1.390779985 | 5.6091E-102 | 2.034E-99   | UP     | sterile alpha motif domain containing 9 like [Source:HGNC Symbol;Acc:HGNC:1349]                                         | chr7  | 93130055  | 93148368  | 7134 |
| GPR174  | 2.00160925  | 6.9635E-102 | 2.4756E-99  | UP     | G protein-coupled receptor 174 [Source:HGNC Symbol;Acc:HGNC:30245]                                                      | chrX  | 79170972  | 79172229  | 1258 |
| ITGAL   | 1.575322323 | 8.5798E-102 | 2.9915E-99  | UP     | integrin subunit alpha L [Source:HGNC Symbol;Acc:HGNC:6148]                                                             | chr16 | 30472658  | 30523185  | 5213 |
| GZMK    | 2.212417649 | 1.5258E-101 | 5.2198E-99  | UP     | granzyme K [Source:HGNC Symbol;Acc:HGNC:4711]                                                                           | chr5  | 55024253  | 55034570  | 1509 |
| CXCL13  | 3.053359662 | 4.0458E-101 | 1.3584E-98  | UP     | C-X-C motif chemokine ligand 13 [Source:HGNC Symbol;Acc:HGNC:10639]                                                     | chr4  | 77511753  | 77611834  | 1203 |

| PARAM      | logFC       | pval        | pval.adj    | UPDOWN | desc                                                                                                                | chr   | start     | end       | size  |
|------------|-------------|-------------|-------------|--------|---------------------------------------------------------------------------------------------------------------------|-------|-----------|-----------|-------|
| NLR5       | 1.22347564  | 4.7715E-101 | 1.57295E-98 | UP     | NLR family CARD domain containing 5 [Source:HGNC Symbol;Acc:HGNC:29933]                                             | chr16 | 56989498  | 57083524  | 6822  |
| TBX21      | 1.906192142 | 1.4232E-100 | 4.60781E-98 | UP     | T-box 21 [Source:HGNC Symbol;Acc:HGNC:11599]                                                                        | chr17 | 47733244  | 47746119  | 2572  |
| SIRPG      | 2.067086242 | 7.9278E-100 | 2.52175E-97 | UP     | signal regulatory protein gamma [Source:HGNC Symbol;Acc:HGNC:15757]                                                 | chr20 | 1629152   | 1657779   | 1870  |
| GNLY       | 2.105835871 | 1.4022E-99  | 4.38334E-97 | UP     | granulysin [Source:HGNC Symbol;Acc:HGNC:4414]                                                                       | chr2  | 85694291  | 85698854  | 1090  |
| TNFRSF9    | 1.866834074 | 2.52164E-98 | 7.74913E-96 | UP     | TNF receptor superfamily member 9 [Source:HGNC Symbol;Acc:HGNC:11924]                                               | chr1  | 7915894   | 7943165   | 5970  |
| CD27       | 2.053137565 | 4.62453E-98 | 1.39746E-95 | UP     | CD27 molecule [Source:HGNC Symbol;Acc:HGNC:11922]                                                                   | chr12 | 6444867   | 6451718   | 1338  |
| FYB1       | 1.461051385 | 6.91315E-98 | 2.05479E-95 | UP     | FYN binding protein 1 [Source:HGNC Symbol;Acc:HGNC:4036]                                                            | chr5  | 39105236  | 39270657  | 5017  |
| UBE2L6     | 1.157802827 | 4.21261E-97 | 1.23192E-94 | UP     | ubiquitin conjugating enzyme E2 L6 [Source:HGNC Symbol;Acc:HGNC:12490]                                              | chr11 | 57551656  | 57568284  | 1796  |
| SLFN12L    | 1.584151989 | 2.46409E-96 | 7.09149E-94 | UP     | schlafen family member 12 like [Source:HGNC Symbol;Acc:HGNC:33920]                                                  | chr17 | 35473689  | 35537861  | 4113  |
| HLA-F      | 1.354403931 | 1.50012E-95 | 4.24981E-93 | UP     | major histocompatibility complex, class I, F [Source:HGNC Symbol;Acc:HGNC:4963]                                     | chr6  | 29722775  | 29727296  | 1985  |
| ZNF683     | 2.273748295 | 4.37736E-95 | 1.22102E-92 | UP     | zinc finger protein 683 [Source:HGNC Symbol;Acc:HGNC:28495]                                                         | chr1  | 26361634  | 26372775  | 1713  |
| PARP14     | 0.896464703 | 9.18118E-95 | 2.52218E-92 | UP     | poly(ADP-ribose) polymerase family member 14 [Source:HGNC Symbol;Acc:HGNC:29232]                                    | chr3  | 122680618 | 122730840 | 7915  |
| KLRD1      | 1.705908105 | 1.09875E-94 | 2.97335E-92 | UP     | killer cell lectin like receptor D1 [Source:HGNC Symbol;Acc:HGNC:6378]                                              | chr12 | 10304446  | 10329600  | 15713 |
| CTLA4      | 1.886644778 | 1.95964E-94 | 5.22503E-92 | UP     | cytotoxic T-lymphocyte associated protein 4 [Source:HGNC Symbol;Acc:HGNC:2505]                                      | chr2  | 203867786 | 203873960 | 2120  |
| LCP2       | 1.236469514 | 5.21723E-94 | 1.37092E-91 | UP     | lymphocyte cytosolic protein 2 [Source:HGNC Symbol;Acc:HGNC:6529]                                                   | chr5  | 170246237 | 170298227 | 4912  |
| HLA-B      | 1.193569972 | 1.01748E-93 | 2.63541E-91 | UP     | major histocompatibility complex, class I, B [Source:HGNC Symbol;Acc:HGNC:4932]                                     | chr6  | 31269491  | 31357187  | 1586  |
| ITK        | 1.73762286  | 1.0596E-93  | 2.70587E-91 | UP     | IL2 inducible T-cell kinase [Source:HGNC Symbol;Acc:HGNC:6171]                                                      | chr5  | 157180826 | 157255191 | 4528  |
| AC245427.1 | 1.851078496 | 1.26893E-93 | 3.19541E-91 | UP     |                                                                                                                     | chr7  | 142791694 | 142793368 | 760   |
| CXCR2P1    | 2.603851406 | 1.81985E-93 | 4.51996E-91 | UP     | C-X-C motif chemokine receptor 2 pseudogene 1 [Source:HGNC Symbol;Acc:HGNC:6028]                                    | chr2  | 218059155 | 218065729 | 2503  |
| UBD        | 2.60312187  | 3.77054E-93 | 9.23834E-91 | UP     | ubiquitin D [Source:HGNC Symbol;Acc:HGNC:18795]                                                                     | chr6  | 29555515  | 2955925   | 1087  |
| APOL6      | 0.987204879 | 6.65903E-92 | 1.6098E-89  | UP     | apolipoprotein L6 [Source:HGNC Symbol;Acc:HGNC:14870]                                                               | chr22 | 35648395  | 35668409  | 10121 |
| UBASH3A    | 1.750636861 | 2.06057E-91 | 4.91581E-89 | UP     | ubiquitin associated and SH3 domain containing A [Source:HGNC Symbol;Acc:HGNC:12462]                                | chr21 | 42403862  | 42447681  | 2557  |
| ADAMDEC1   | 2.169392299 | 3.43239E-91 | 8.08216E-89 | UP     | ADAM like decysin 1 [Source:HGNC Symbol;Acc:HGNC:16299]                                                             | chr8  | 24384285  | 24406013  | 2348  |
| B2M        | 0.954485542 | 1.60935E-90 | 3.74091E-88 | UP     | beta-2-microglobulin [Source:HGNC Symbol;Acc:HGNC:914]                                                              | chr15 | 44711477  | 44718877  | 2388  |
| PARP9      | 0.863935393 | 1.94928E-90 | 4.47373E-88 | UP     | poly(ADP-ribose) polymerase family member 9 [Source:HGNC Symbol;Acc:HGNC:24118]                                     | chr3  | 122527924 | 122564577 | 7833  |
| TRAT1      | 1.99136714  | 2.48967E-90 | 5.64253E-88 | UP     | T-cell receptor associated transmembrane adaptor 1 [Source:HGNC Symbol;Acc:HGNC:30698]                              | chr3  | 108822698 | 108855005 | 1919  |
| SLA2       | 1.723760062 | 2.8446E-90  | 6.36734E-88 | UP     | Src like adaptor 2 [Source:HGNC Symbol;Acc:HGNC:17329]                                                              | chr20 | 36612318  | 36646216  | 2757  |
| PDCD1LG2   | 1.613004062 | 4.12038E-90 | 9.11056E-88 | UP     | programmed cell death 1 ligand 2 [Source:HGNC Symbol;Acc:HGNC:18731]                                                | chr9  | 5510570   | 5571254   | 2365  |
| CS77       | 1.623423258 | 7.24379E-90 | 1.58238E-87 | UP     | cystatin F [Source:HGNC Symbol;Acc:HGNC:2479]                                                                       | chr20 | 24949230  | 24959928  | 930   |
| TRAV12-2   | 2.139428143 | 8.6587E-90  | 1.86894E-87 | UP     | T-cell receptor alpha variable 12-2 [Source:HGNC Symbol;Acc:HGNC:12106]                                             | chr14 | 21887857  | 21888502  | 445   |
| TRGV10     | 2.033048932 | 1.49793E-89 | 3.19518E-87 | UP     | T-cell receptor gamma variable 10 (non-functional) [Source:HGNC Symbol;Acc:HGNC:12285]                              | chr7  | 38299811  | 38300322  | 512   |
| PTPRC      | 1.392714174 | 1.59052E-89 | 3.35321E-87 | UP     | protein tyrosine phosphatase, receptor type C [Source:HGNC Symbol;Acc:HGNC:9666]                                    | chr1  | 198639040 | 198757283 | 7151  |
| FAM26F     | 1.768225123 | 2.52253E-89 | 5.25702E-87 | UP     | family with sequence similarity 26 member F [Source:HGNC Symbol;Acc:HGNC:33391]                                     | chr6  | 116461370 | 116463779 | 1140  |
| SLAMF6     | 1.8096531   | 2.8278E-89  | 5.82624E-87 | UP     | SLAM family member 6 [Source:HGNC Symbol;Acc:HGNC:21392]                                                            | chr1  | 160485030 | 160523262 | 2746  |
| C1QB       | 1.471688253 | 3.20098E-89 | 6.52101E-87 | UP     | complement C1q B chain [Source:HGNC Symbol;Acc:HGNC:1242]                                                           | chr1  | 22652981  | 22661538  | 1254  |
| SLAMF8     | 1.557311606 | 3.85782E-89 | 7.77179E-87 | UP     | SLAM family member 8 [Source:HGNC Symbol;Acc:HGNC:21391]                                                            | chr1  | 159826750 | 159837249 | 2996  |
| GPR171     | 1.872539801 | 9.13519E-89 | 1.82011E-86 | UP     | G protein-coupled receptor 171 [Source:HGNC Symbol;Acc:HGNC:30057]                                                  | chr3  | 151197832 | 151203192 | 1786  |
| IL10RA     | 1.249322331 | 1.0708E-88  | 2.11029E-86 | UP     | interleukin 10 receptor subunit alpha [Source:HGNC Symbol;Acc:HGNC:5964]                                            | chr11 | 117986348 | 118001479 | 3695  |
| TYMP       | 1.3963141   | 1.66255E-88 | 3.24125E-86 | UP     | thymidine phosphorylase [Source:HGNC Symbol;Acc:HGNC:3148]                                                          | chr22 | 50525752  | 50530056  | 1680  |
| IFIH1      | 1.064498742 | 1.95252E-87 | 3.76609E-85 | UP     | interferon induced with helicase C domain 1 [Source:HGNC Symbol;Acc:HGNC:18873]                                     | chr2  | 162267079 | 162318703 | 4213  |
| TNFSF13B   | 1.379375948 | 2.57268E-87 | 4.91003E-85 | UP     | TNF superfamily member 13b [Source:HGNC Symbol;Acc:HGNC:11929]                                                      | chr13 | 108269629 | 108308484 | 2671  |
| CD74       | 1.272737337 | 8.4714E-87  | 1.59995E-84 | UP     | CD74 molecule [Source:HGNC Symbol;Acc:HGNC:1697]                                                                    | chr5  | 150401637 | 150412929 | 1674  |
| CYBB       | 1.331785392 | 2.57652E-86 | 4.81597E-84 | UP     | cytochrome b-245 beta chain [Source:HGNC Symbol;Acc:HGNC:2578]                                                      | chrX  | 37780011  | 37813461  | 4324  |
| HLA-DRA    | 1.335550239 | 6.61317E-86 | 1.2235E-83  | UP     | major histocompatibility complex, class II, DR alpha [Source:HGNC Symbol;Acc:HGNC:4947]                             | chr6  | 32439842  | 32445046  | 1280  |
| CD48       | 1.55397453  | 1.13125E-85 | 2.07179E-83 | UP     | CD48 molecule [Source:HGNC Symbol;Acc:HGNC:1683]                                                                    | chr1  | 160678746 | 160711851 | 3274  |
| C1QA       | 1.402823398 | 1.39665E-85 | 2.53227E-83 | UP     | complement C1q A chain [Source:HGNC Symbol;Acc:HGNC:1241]                                                           | chr1  | 22636506  | 22639608  | 1173  |
| PTPN22     | 1.384311481 | 1.63053E-85 | 2.92704E-83 | UP     | protein tyrosine phosphatase, non-receptor type 22 [Source:HGNC Symbol;Acc:HGNC:9652]                               | chr1  | 113813811 | 113871759 | 3932  |
| EPST11     | 1.346673766 | 1.94676E-85 | 3.46046E-83 | UP     | epithelial stromal interaction 1 [Source:HGNC Symbol;Acc:HGNC:16465]                                                | chr13 | 42886388  | 42992249  | 3179  |
| MAP4K1     | 1.321764213 | 5.22369E-85 | 9.19521E-83 | UP     | mitogen-activated protein kinase kinase kinase kinase 1 [Source:HGNC Symbol;Acc:HGNC:6863]                          | chr19 | 38587641  | 38618882  | 2897  |
| NLR3       | 1.502962693 | 7.29853E-85 | 1.2724E-82  | UP     | NLR family CARD domain containing 3 [Source:HGNC Symbol;Acc:HGNC:29889]                                             | chr16 | 3539033   | 3577391   | 6453  |
| LILRB4     | 1.496809596 | 7.5816E-85  | 1.30916E-82 | UP     | leukocyte immunoglobulin like receptor B4 [Source:HGNC Symbol;Acc:HGNC:6608]                                        | chr19 | 54662128  | 54670359  | 4005  |
| SAMSN1     | 1.276874394 | 2.56393E-84 | 4.38554E-82 | UP     | SAM domain, SH3 domain and nuclear localization signals 1 [Source:HGNC Symbol;Acc:HGNC:10528]                       | chr21 | 14485228  | 14583402  | 2465  |
| PTPN7      | 1.484480292 | 3.07186E-84 | 5.20522E-82 | UP     | protein tyrosine phosphatase, non-receptor type 7 [Source:HGNC Symbol;Acc:HGNC:9659]                                | chr1  | 202147013 | 202161581 | 4302  |
| SAMHD1     | 0.920543553 | 4.64101E-84 | 7.79131E-82 | UP     | SAM and HD domain containing deoxynucleoside triphosphate triphosphohydrolase 1 [Source:HGNC Symbol;Acc:HGNC:15925] | chr20 | 36890229  | 36951843  | 4784  |
| IL21R      | 1.671126682 | 8.63762E-84 | 1.43678E-81 | UP     | interleukin 21 receptor [Source:HGNC Symbol;Acc:HGNC:6006]                                                          | chr16 | 27402162  | 27452042  | 5108  |
| SP140      | 1.562992832 | 8.78321E-84 | 1.44771E-81 | UP     | SP140 nuclear body protein [Source:HGNC Symbol;Acc:HGNC:17133]                                                      | chr2  | 230225730 | 230313215 | 3577  |
| HAVCR2     | 1.219490661 | 1.26504E-83 | 2.06635E-81 | UP     | hepatitis A virus cellular receptor 2 [Source:HGNC Symbol;Acc:HGNC:18437]                                           | chr5  | 157085832 | 157109714 | 2907  |

| PARAM      | logFC       | pval        | pval.adj    | UPDOWN | desc                                                                                           | chr   | start     | end       | size  |
|------------|-------------|-------------|-------------|--------|------------------------------------------------------------------------------------------------|-------|-----------|-----------|-------|
| IL12RB2    | 1.981039708 | 1.61696E-83 | 2.6176E-81  | UP     | interleukin 12 receptor subunit beta 2 [Source:HGNC Symbol;Acc:HGNC:5972]                      | chr1  | 67307364  | 67396900  | 4128  |
| CD6        | 1.510266432 | 2.98135E-83 | 4.78362E-81 | UP     | CD6 molecule [Source:HGNC Symbol;Acc:HGNC:1691]                                                | chr11 | 60971680  | 61020377  | 3252  |
| CD8B       | 1.898274384 | 1.26998E-82 | 2.01983E-80 | UP     | CD8b molecule [Source:HGNC Symbol;Acc:HGNC:1707]                                               | chr2  | 86815339  | 86861924  | 1864  |
| CD247      | 1.498163224 | 1.5139E-82  | 2.38683E-80 | UP     | CD247 molecule [Source:HGNC Symbol;Acc:HGNC:1677]                                              | chr1  | 167430640 | 167518610 | 1681  |
| GBP1P1     | 1.733936467 | 3.10409E-82 | 4.85175E-80 | UP     | guanylate binding protein 1 pseudogene 1 [Source:HGNC Symbol;Acc:HGNC:39561]                   | chr1  | 89407679  | 89426243  | 2352  |
| IL2RG      | 1.543279903 | 6.84021E-82 | 1.06E-79    | UP     | interleukin 2 receptor subunit gamma [Source:HGNC Symbol;Acc:HGNC:6010]                        | chrX  | 71107404  | 71111631  | 1534  |
| HCST       | 1.37957933  | 7.72902E-82 | 1.18758E-79 | UP     | hematopoietic cell signal transducer [Source:HGNC Symbol;Acc:HGNC:16977]                       | chr19 | 35902480  | 35904377  | 613   |
| IL15RA     | 1.180276706 | 8.68548E-82 | 1.32333E-79 | UP     | interleukin 15 receptor subunit alpha [Source:HGNC Symbol;Acc:HGNC:5978]                       | chr10 | 5943639   | 5978187   | 2909  |
| HLA-DPA1   | 1.298003314 | 9.21446E-82 | 1.39223E-79 | UP     | major histocompatibility complex, class II, DP alpha 1 [Source:HGNC Symbol;Acc:HGNC:4938]      | chr6  | 33064569  | 33080710  | 1704  |
| PSMB8      | 1.026998483 | 1.98488E-81 | 2.97421E-79 | UP     | proteasome subunit beta 8 [Source:HGNC Symbol;Acc:HGNC:9545]                                   | chr6  | 32840717  | 32844703  | 1549  |
| SLAMF1     | 1.676365545 | 2.12574E-81 | 3.15916E-79 | UP     | signaling lymphocytic activation molecule family member 1 [Source:HGNC Symbol;Acc:HGNC:10903]  | chr1  | 160608100 | 160647295 | 4089  |
| ARHGAP9    | 1.258222174 | 3.71809E-81 | 5.4807E-79  | UP     | Rho GTPase activating protein 9 [Source:HGNC Symbol;Acc:HGNC:14130]                            | chr12 | 57472255  | 57488814  | 3675  |
| PLEK       | 1.373166431 | 3.90826E-81 | 5.71457E-79 | UP     | pleckstrin [Source:HGNC Symbol;Acc:HGNC:9070]                                                  | chr2  | 68365173  | 68397453  | 2869  |
| P2RY10     | 1.766747228 | 5.3396E-81  | 7.74498E-79 | UP     | purinergic receptor P2Y10 [Source:HGNC Symbol;Acc:HGNC:19906]                                  | chrX  | 78945332  | 78961954  | 1803  |
| APOL3      | 1.215321755 | 5.82959E-81 | 8.3886E-79  | UP     | apolipoprotein L3 [Source:HGNC Symbol;Acc:HGNC:14868]                                          | chr22 | 36140330  | 36166177  | 3863  |
| LAX1       | 1.844018785 | 6.21531E-81 | 8.87322E-79 | UP     | lymphocyte transmembrane adaptor 1 [Source:HGNC Symbol;Acc:HGNC:26005]                         | chr1  | 203765176 | 203776117 | 3023  |
| C1QC       | 1.315041304 | 8.54825E-81 | 1.21085E-78 | UP     | complement C1q C chain [Source:HGNC Symbol;Acc:HGNC:1245]                                      | chr1  | 22643630  | 22648110  | 1335  |
| TRBC2      | 1.585569451 | 1.31001E-80 | 1.84122E-78 | UP     | T-cell receptor beta constant 2 [Source:HGNC Symbol;Acc:HGNC:12157]                            | chr7  | 142801041 | 142802748 | 758   |
| PSME2      | 0.674124899 | 8.34451E-80 | 1.1638E-77  | UP     | proteasome activator subunit 2 [Source:HGNC Symbol;Acc:HGNC:9569]                              | chr14 | 24143365  | 24147221  | 1488  |
| ACAP1      | 1.450075156 | 1.23981E-79 | 1.71595E-77 | UP     | ArfGAP with coiled-coil, ankyrin repeat and PH domains 1 [Source:HGNC Symbol;Acc:HGNC:16467]   | chr17 | 7336529   | 7351478   | 2880  |
| DTHD1      | 1.906526686 | 3.88793E-79 | 5.34031E-77 | UP     | death domain containing 1 [Source:HGNC Symbol;Acc:HGNC:37261]                                  | chr4  | 36281622  | 36344785  | 3933  |
| TRGC2      | 1.998926828 | 6.75378E-79 | 9.20698E-77 | UP     | T-cell receptor gamma constant 2 [Source:HGNC Symbol;Acc:HGNC:12276]                           | chr7  | 38239580  | 38249572  | 1013  |
| RARRRES3   | 1.534546187 | 1.74927E-78 | 2.36687E-76 | UP     | retinoic acid receptor responder 3 [Source:HGNC Symbol;Acc:HGNC:9869]                          | chr11 | 63536816  | 63546462  | 1271  |
| BTN3A3     | 0.887809611 | 6.81919E-78 | 2.54665E-76 | UP     | butyrophilin subfamily 3 member A3 [Source:HGNC Symbol;Acc:HGNC:1140]                          | chr6  | 26440472  | 26453415  | 3002  |
| SECTM1     | 1.4516467   | 3.1121E-78  | 4.14894E-76 | UP     | secreted and transmembrane 1 [Source:HGNC Symbol;Acc:HGNC:10707]                               | chr17 | 82321024  | 82333998  | 2235  |
| LCK        | 1.392038    | 3.45062E-78 | 4.56665E-76 | UP     | LCK proto-oncogene, Src family tyrosine kinase [Source:HGNC Symbol;Acc:HGNC:6524]              | chr1  | 32251239  | 32286165  | 2497  |
| CASP1      | 1.028863096 | 4.79684E-78 | 6.30228E-76 | UP     | caspase 1 [Source:HGNC Symbol;Acc:HGNC:1499]                                                   | chr11 | 105025508 | 105035250 | 2668  |
| ZBP1       | 1.825939168 | 5.18239E-78 | 6.75985E-76 | UP     | Z-DNA binding protein 1 [Source:HGNC Symbol;Acc:HGNC:16176]                                    | chr20 | 57603846  | 57620576  | 2570  |
| CD226      | 1.258781086 | 6.36506E-78 | 8.24321E-76 | UP     | CD226 molecule [Source:HGNC Symbol;Acc:HGNC:16961]                                             | chr18 | 69853275  | 69956996  | 12824 |
| SEPT1      | 1.507893442 | 1.55693E-77 | 2.00204E-75 | UP     | septin 1 [Source:HGNC Symbol;Acc:HGNC:2879]                                                    | chr16 | 30378133  | 30382850  | 1592  |
| IL15       | 1.236084308 | 1.94644E-77 | 2.48527E-75 | UP     | interleukin 15 [Source:HGNC Symbol;Acc:HGNC:5977]                                              | chr4  | 141636599 | 141733987 | 7517  |
| GIMAP4     | 1.081137107 | 2.37983E-77 | 3.0174E-75  | UP     | GTPase, IMAP family member 4 [Source:HGNC Symbol;Acc:HGNC:21872]                               | chr7  | 150567277 | 150573955 | 2102  |
| IFIT3      | 1.3059609   | 4.74164E-77 | 5.97019E-75 | UP     | interferon induced protein with tetratricopeptide repeats 3 [Source:HGNC Symbol;Acc:HGNC:5411] | chr10 | 89327894  | 89340971  | 2640  |
| TFCF       | 1.380218188 | 1.05344E-76 | 1.31723E-74 | UP     | transcription factor EC [Source:HGNC Symbol;Acc:HGNC:11754]                                    | chr7  | 115935148 | 116159896 | 8163  |
| TLR8       | 1.491054798 | 2.3059E-76  | 2.86358E-74 | UP     | toll like receptor 8 [Source:HGNC Symbol;Acc:HGNC:15632]                                       | chrX  | 12906620  | 12923169  | 4353  |
| ZNF831     | 1.70662532  | 2.93939E-76 | 3.62545E-74 | UP     | zinc finger protein 831 [Source:HGNC Symbol;Acc:HGNC:16167]                                    | chr20 | 59123381  | 59259113  | 10953 |
| IKZF1      | 1.337182184 | 3.75314E-76 | 4.59785E-74 | UP     | IKAROS family zinc finger 1 [Source:HGNC Symbol;Acc:HGNC:13176]                                | chr7  | 50304728  | 50405101  | 7868  |
| TAP2       | 1.101814872 | 5.05448E-76 | 6.15052E-74 | UP     | transporter 2, ATP binding cassette subfamily B member [Source:HGNC Symbol;Acc:HGNC:44]        | chr6  | 32821833  | 32838780  | 6175  |
| TAGAP      | 1.279553748 | 7.42004E-76 | 8.96885E-74 | UP     | T-cell activation RhoGTPase activating protein [Source:HGNC Symbol;Acc:HGNC:15669]             | chr6  | 159034468 | 159045152 | 4089  |
| JAKMIP1    | 1.675583011 | 9.25717E-76 | 1.11153E-73 | UP     | janus kinase and microtubule interacting protein 1 [Source:HGNC Symbol;Acc:HGNC:26460]         | chr4  | 6026199   | 6200591   | 3572  |
| FCER1G     | 1.216893067 | 2.99777E-75 | 3.57583E-73 | UP     | Fc fragment of IgE receptor Ig [Source:HGNC Symbol;Acc:HGNC:3611]                              | chr1  | 161215279 | 161220699 | 919   |
| ABCD2      | 1.542086721 | 3.55879E-75 | 4.21728E-73 | UP     | ATP binding cassette subfamily D member 2 [Source:HGNC Symbol;Acc:HGNC:66]                     | chr12 | 39550033  | 39619751  | 6238  |
| HLA-DPB1   | 1.205148155 | 1.0879E-74  | 1.28082E-72 | UP     | major histocompatibility complex, class II, DP beta 1 [Source:HGNC Symbol;Acc:HGNC:4940]       | chr6  | 33075926  | 33087201  | 1560  |
| SASH3      | 1.27569623  | 2.35646E-74 | 2.75645E-72 | UP     | SAM and SH3 domain containing 3 [Source:HGNC Symbol;Acc:HGNC:15975]                            | chrX  | 129779984 | 129795201 | 2626  |
| AC243829.4 | 2.229590371 | 2.57511E-74 | 2.9929E-72  | UP     |                                                                                                | chr17 | 36072866  | 36090134  | 1630  |
| CD53       | 1.219399667 | 3.22727E-74 | 3.72699E-72 | UP     | CD53 molecule [Source:HGNC Symbol;Acc:HGNC:1686]                                               | chr1  | 110873154 | 110899928 | 1505  |
| IRF4       | 1.930861842 | 4.08632E-74 | 4.68918E-72 | UP     | interferon regulatory factor 4 [Source:HGNC Symbol;Acc:HGNC:6119]                              | chr6  | 391739    | 411447    | 5331  |
| CD86       | 1.147706922 | 6.95318E-74 | 7.92881E-72 | UP     | CD86 molecule [Source:HGNC Symbol;Acc:HGNC:1705]                                               | chr3  | 122055366 | 122121139 | 2916  |
| DOCK2      | 1.134559136 | 9.1472E-74  | 1.03655E-71 | UP     | dedicator of cytokinesis 2 [Source:HGNC Symbol;Acc:HGNC:2988]                                  | chr5  | 169637247 | 170083382 | 6949  |
| GF1I       | 1.391561998 | 1.0732E-73  | 1.20859E-71 | UP     | growth factor independent 1 transcriptional repressor [Source:HGNC Symbol;Acc:HGNC:4237]       | chr1  | 92474762  | 92486876  | 3064  |
| CXCR3      | 1.75411298  | 1.11575E-73 | 1.24875E-71 | UP     | C-X-C motif chemokine receptor 3 [Source:HGNC Symbol;Acc:HGNC:4540]                            | chrX  | 71615916  | 71618517  | 1868  |
| HLA-DMA    | 1.031029029 | 1.9709E-73  | 2.1923E-71  | UP     | major histocompatibility complex, class II, DM alpha [Source:HGNC Symbol;Acc:HGNC:4934]        | chr6  | 32948613  | 32953122  | 1123  |
| FGL2       | 1.204185596 | 4.48321E-73 | 4.95641E-71 | UP     | fibritogen like 2 [Source:HGNC Symbol;Acc:HGNC:3696]                                           | chr7  | 77193371  | 77199848  | 4604  |
| GVINP1     | 1.243871002 | 4.53676E-73 | 4.98521E-71 | UP     | GTPase, very large interferon inducible pseudogene 1 [Source:HGNC Symbol;Acc:HGNC:25813]       | chr11 | 6713356   | 6746439   | 8438  |
| LILRB1     | 1.272971241 | 8.25565E-73 | 9.01706E-71 | UP     | leukocyte immunoglobulin like receptor B1 [Source:HGNC Symbol;Acc:HGNC:6605]                   | chr19 | 54617158  | 54637528  | 3504  |
| IL2RA      | 1.411418518 | 1.14144E-72 | 1.23924E-70 | UP     | interleukin 2 receptor subunit alpha [Source:HGNC Symbol;Acc:HGNC:6008]                        | chr10 | 6010689   | 6062325   | 3176  |
| IL18RAP    | 1.46854395  | 1.29876E-72 | 1.40166E-70 | UP     | interleukin 18 receptor accessory protein [Source:HGNC Symbol;Acc:HGNC:5989]                   | chr2  | 102418689 | 102452565 | 2773  |



| PARAM     | logFC       | pval        | pval.adj    | UPDOWN | desc                                                                                                      | chr   | start      | end       | size  |
|-----------|-------------|-------------|-------------|--------|-----------------------------------------------------------------------------------------------------------|-------|------------|-----------|-------|
| NMI       | 0.721975004 | 1.9474E-72  | 2.08925E-70 | UP     | N-myc and STAT interactor [Source:HGNC Symbol;Acc:HGNC:7854]                                              | chr2  | 151270465  | 151290057 | 1623  |
| GPR65     | 1.166615504 | 2.14581E-72 | 2.28857E-70 | UP     | G protein-coupled receptor 65 [Source:HGNC Symbol;Acc:HGNC:4517]                                          | chr14 | 88005124   | 88014811  | 4522  |
| KLRC4     | 1.964168012 | 2.50865E-72 | 2.6599E-70  | UP     | killer cell lectin like receptor C4 [Source:HGNC Symbol;Acc:HGNC:6377]                                    | chr12 | 10407382   | 10409757  | 930   |
| SIGLEC10  | 1.36331501  | 3.42811E-72 | 3.61367E-70 | UP     | sialic acid binding lg like lectin 10 [Source:HGNC Symbol;Acc:HGNC:15620]                                 | chr19 | 51410021   | 51417803  | 3394  |
| DTX3L     | 0.654736839 | 5.27647E-72 | 5.52992E-70 | UP     | deltex E3 ubiquitin ligase 3L [Source:HGNC Symbol;Acc:HGNC:30323]                                         | chr3  | 122564238  | 122575203 | 5868  |
| CD5       | 1.516526951 | 5.78679E-72 | 6.02991E-70 | UP     | CD5 molecule [Source:HGNC Symbol;Acc:HGNC:1685]                                                           | chr11 | 61102395   | 61127852  | 3221  |
| KLRC1     | 1.903932534 | 7.92188E-72 | 8.20752E-70 | UP     | killer cell lectin like receptor C1 [Source:HGNC Symbol;Acc:HGNC:6374]                                    | chr12 | 10442264   | 10454685  | 1798  |
| CIITA     | 1.236701581 | 9.77473E-72 | 1.00475E-69 | UP     | class II major histocompatibility complex transactivator [Source:HGNC Symbol;Acc:HGNC:7067]               | chr16 | 10877198   | 10932281  | 12001 |
| BTN3A1    | 0.778168805 | 9.8087E-72  | 1.00475E-69 | UP     | butyrophilin subfamily 3 member A1 [Source:HGNC Symbol;Acc:HGNC:1138]                                     | chr6  | 26402237   | 26415216  | 4191  |
| WAS       | 1.056444815 | 1.00117E-71 | 1.01979E-69 | UP     | Wiskott-Aldrich syndrome [Source:HGNC Symbol;Acc:HGNC:12731]                                              | chrX  | 48683779   | 48691427  | 1849  |
| HLA-DMB   | 1.223328991 | 1.45576E-71 | 1.47455E-69 | UP     | major histocompatibility complex, class II, DM beta [Source:HGNC Symbol;Acc:HGNC:4935]                    | chr6  | 32934629   | 32941070  | 1397  |
| RASAL3    | 1.21074011  | 2.78203E-71 | 2.80227E-69 | UP     | RAS protein activator like 3 [Source:HGNC Symbol;Acc:HGNC:26129]                                          | chr19 | 15451624   | 15464571  | 3293  |
| SLA       | 1.205016833 | 5.42445E-71 | 5.43374E-69 | UP     | Src like adaptor [Source:HGNC Symbol;Acc:HGNC:10902]                                                      | chr8  | 133036724  | 133103054 | 3609  |
| CYTI1     | 1.33951612  | 9.25051E-71 | 9.21544E-69 | UP     | cytohesin 1 interacting protein [Source:HGNC Symbol;Acc:HGNC:9506]                                        | chr2  | 157414619  | 157444142 | 2260  |
| PSMB10    | 0.727192066 | 9.68258E-71 | 9.59316E-69 | UP     | proteasome subunit beta 10 [Source:HGNC Symbol;Acc:HGNC:9538]                                             | chr16 | 67934502   | 67937087  | 1218  |
| CARD16    | 1.018313235 | 1.56269E-70 | 1.53985E-68 | UP     | caspase recruitment domain family member 16 [Source:HGNC Symbol;Acc:HGNC:33701]                           | chr11 | 105041326  | 105101431 | 834   |
| TRAV13-1  | 1.782811636 | 1.62862E-70 | 1.59614E-68 | UP     | T-cell receptor alpha variable 13-1 [Source:HGNC Symbol;Acc:HGNC:12108]                                   | chr14 | 21868839   | 21869365  | 360   |
| AIF1      | 1.098060722 | 2.00475E-70 | 1.9542E-68  | UP     | allograft inflammatory factor 1 [Source:HGNC Symbol;Acc:HGNC:352]                                         | chr6  | 31615184   | 31617021  | 824   |
| PSMB8-AS1 | 1.116048441 | 6.00699E-70 | 5.82421E-68 | UP     | PSMB8 antisense RNA 1 (head to head) [Source:HGNC Symbol;Acc:HGNC:39758]                                  | chr6  | 32844108   | 32846210  | 1349  |
| HLA-DOA   | 1.325847277 | 7.15866E-70 | 6.90392E-68 | UP     | major histocompatibility complex, class II, DO alpha [Source:HGNC Symbol;Acc:HGNC:4936]                   | chr6  | 33004178   | 33009612  | 3489  |
| HLA-E     | 0.762629469 | 7.62585E-70 | 7.31557E-68 | UP     | major histocompatibility complex, class I, E [Source:HGNC Symbol;Acc:HGNC:4962]                           | chr6  | 30489467   | 30494205  | 2601  |
| TRAV17    | 1.610730988 | 9.28946E-70 | 8.86459E-68 | UP     | T-cell receptor alpha variable 17 [Source:HGNC Symbol;Acc:HGNC:12113]                                     | chr14 | 21997539   | 21998168  | 484   |
| IL4I1     | 1.509212404 | 1.54999E-69 | 1.47135E-67 | UP     | interleukin 4 induced 1 [Source:HGNC Symbol;Acc:HGNC:19094]                                               | chr19 | 49889654   | 49929359  | 2563  |
| TRBV20-1  | 1.830109468 | 1.78136E-69 | 1.68218E-67 | UP     | T-cell receptor beta variable 20-1 [Source:HGNC Symbol;Acc:HGNC:12196]                                    | chr7  | 142626649  | 142627399 | 413   |
| HLA-A     | 0.989010287 | 2.02958E-69 | 1.90665E-67 | UP     | major histocompatibility complex, class I, A [Source:HGNC Symbol;Acc:HGNC:4931]                           | chr6  | 29941260   | 29945884  | 2045  |
| GIMAP7    | 1.122275143 | 2.14003E-69 | 2.00005E-67 | UP     | GTPase, IMAP family member 7 [Source:HGNC Symbol;Acc:HGNC:22404]                                          | chr7  | 150514830  | 150521073 | 1256  |
| TRGV7     | 1.793268684 | 2.19303E-69 | 2.03907E-67 | UP     | T-cell receptor gamma variable 9 [Source:HGNC Symbol;Acc:HGNC:12295]                                      | chr7  | 38317017   | 38318861  | 1735  |
| ITGB7     | 1.030762265 | 2.58542E-69 | 2.39165E-67 | UP     | integrin subunit beta 7 [Source:HGNC Symbol;Acc:HGNC:6162]                                                | chr12 | 53191318   | 53207307  | 2867  |
| BIN2      | 1.117187145 | 3.52692E-69 | 3.24602E-67 | UP     | bridging integrator 2 [Source:HGNC Symbol;Acc:HGNC:1053]                                                  | chr12 | 51281038   | 51324668  | 2411  |
| CLEC6A    | 1.930415    | 6.54254E-69 | 5.99105E-67 | UP     | C-type lectin domain containing 6A [Source:HGNC Symbol;Acc:HGNC:14556]                                    | chr12 | 8455926    | 8478330   | 1682  |
| NCKAP1L   | 1.10142327  | 7.90917E-69 | 7.20609E-67 | UP     | NCK associated protein 1 like [Source:HGNC Symbol;Acc:HGNC:4862]                                          | chr12 | 54497711   | 54548238  | 9068  |
| PIK3CG    | 1.066157365 | 9.14153E-69 | 8.28725E-67 | UP     | phosphatidylinositol-4,5-bisphosphate 3-kinase catalytic subunit gamma [Source:HGNC Symbol;Acc:HGNC:8978] | chr7  | 1068865278 | 106907145 | 5526  |
| SAMD3     | 1.410777301 | 1.0186E-68  | 9.1882E-67  | UP     | sterile alpha motif domain containing 3 [Source:HGNC Symbol;Acc:HGNC:21574]                               | chr6  | 130144315  | 130365425 | 5923  |
| FMNL1     | 1.00804301  | 1.1906E-68  | 1.06866E-66 | UP     | formin like 1 [Source:HGNC Symbol;Acc:HGNC:1212]                                                          | chr17 | 45221789   | 45247320  | 4168  |
| TRDC      | 1.729147732 | 1.83012E-68 | 1.63457E-66 | UP     | T-cell receptor delta constant [Source:HGNC Symbol;Acc:HGNC:12253]                                        | chr14 | 22462932   | 22465787  | 720   |
| PLA2G2D   | 2.675490877 | 4.72175E-68 | 4.19657E-66 | UP     | phospholipase A2 group IID [Source:HGNC Symbol;Acc:HGNC:9033]                                             | chr1  | 20111939   | 20119566  | 2681  |
| NCR1      | 1.727377426 | 6.24676E-68 | 5.52488E-66 | UP     | natural cytotoxicity triggering receptor 1 [Source:HGNC Symbol;Acc:HGNC:6731]                             | chr19 | 54906150   | 54916140  | 1628  |
| CD84      | 1.173249587 | 6.98349E-68 | 6.14649E-66 | UP     | CD84 molecule [Source:HGNC Symbol;Acc:HGNC:1704]                                                          | chr1  | 160541095  | 160579516 | 8278  |
| SP110     | 0.755465513 | 1.35364E-67 | 1.18564E-65 | UP     | SP110 nuclear body protein [Source:HGNC Symbol;Acc:HGNC:5401]                                             | chr2  | 230168918  | 230225729 | 3115  |
| ZAP70     | 1.401529291 | 1.84739E-67 | 1.61034E-65 | UP     | zeta chain of T-cell receptor associated protein kinase 70 [Source:HGNC Symbol;Acc:HGNC:12858]            | chr2  | 97713560   | 97739860  | 2551  |
| APOBEC3G  | 1.015214984 | 3.77484E-67 | 3.27472E-65 | UP     | apolipoprotein B mRNA editing enzyme catalytic subunit 3G [Source:HGNC Symbol;Acc:HGNC:17357]             | chr22 | 39077005   | 39087743  | 1834  |
| BTN2A2    | 0.75491181  | 4.58624E-67 | 3.95967E-65 | UP     | butyrophilin subfamily 2 member A2 [Source:HGNC Symbol;Acc:HGNC:1137]                                     | chr6  | 26383096   | 26394874  | 3880  |
| FOXP3     | 1.281726557 | 4.76248E-67 | 4.09235E-65 | UP     | forkhead box P3 [Source:HGNC Symbol;Acc:HGNC:6106]                                                        | chrX  | 49250436   | 49264826  | 2647  |
| ITGB2     | 1.141680287 | 7.10999E-67 | 6.08072E-65 | UP     | integrin subunit beta 2 [Source:HGNC Symbol;Acc:HGNC:6155]                                                | chr21 | 44885953   | 44928873  | 3500  |
| CORO1A    | 1.06072501  | 8.24249E-67 | 7.01618E-65 | UP     | coronin 1A [Source:HGNC Symbol;Acc:HGNC:2252]                                                             | chr16 | 30183422   | 30189076  | 1921  |
| CD4       | 0.977846569 | 1.01002E-66 | 8.55736E-65 | UP     | CD4 molecule [Source:HGNC Symbol;Acc:HGNC:1678]                                                           | chr12 | 6789472    | 6820808   | 3439  |
| TRBV19    | 1.668433575 | 1.05882E-66 | 8.92908E-65 | UP     | T-cell receptor beta variable 19 [Source:HGNC Symbol;Acc:HGNC:12194]                                      | chr7  | 142618849  | 142619532 | 552   |
| MCOLN2    | 1.328498841 | 1.73908E-66 | 1.45978E-64 | UP     | mucopolin 2 [Source:HGNC Symbol;Acc:HGNC:13357]                                                           | chr1  | 84925583   | 84997112  | 2976  |
| SIT1      | 1.589844364 | 2.05288E-66 | 1.71524E-64 | UP     | signaling threshold regulating transmembrane adaptor 1 [Source:HGNC Symbol;Acc:HGNC:17710]                | chr9  | 35649295   | 35650950  | 1326  |
| TRAV19    | 1.73436531  | 2.68322E-66 | 2.23163E-64 | UP     | T-cell receptor alpha variable 19 [Source:HGNC Symbol;Acc:HGNC:12115]                                     | chr14 | 22007512   | 22008181  | 467   |
| TRAV14DV4 | 1.773020486 | 2.95739E-66 | 2.44842E-64 | UP     | T-cell receptor alpha variable 14/delta variable 4 [Source:HGNC Symbol;Acc:HGNC:12110]                    | chr14 | 21924605   | 21924651  | 425   |
| PPP1R16B  | 1.175778337 | 6.84061E-66 | 5.6376E-64  | UP     | protein phosphatase 1 regulatory subunit 16B [Source:HGNC Symbol;Acc:HGNC:15850]                          | chr20 | 38805705   | 38923024  | 6251  |
| BIRC3     | 1.419366173 | 7.04017E-66 | 5.77581E-64 | UP     | baculoviral IAP repeat containing 3 [Source:HGNC Symbol;Acc:HGNC:591]                                     | chr11 | 102317450  | 102339403 | 6911  |
| STX11     | 1.112590418 | 1.46432E-65 | 1.19593E-63 | UP     | syntaxin 11 [Source:HGNC Symbol;Acc:HGNC:11429]                                                           | chr6  | 144150526  | 144188370 | 1926  |
| DENND1C   | 1.188384714 | 1.96922E-65 | 1.60107E-63 | UP     | DENN domain containing 1C [Source:HGNC Symbol;Acc:HGNC:26225]                                             | chr19 | 6467207    | 6481808   | 2816  |
| ARHGAP25  | 0.925867824 | 2.21552E-65 | 1.79329E-63 | UP     | Rho GTPase activating protein 25 [Source:HGNC Symbol;Acc:HGNC:28951]                                      | chr2  | 68734835   | 68826833  | 4022  |
| FCGR3A    | 1.389422615 | 2.71518E-65 | 2.18795E-63 | UP     | Fc fragment of IgG receptor IIIa [Source:HGNC Symbol;Acc:HGNC:3619]                                       | chr1  | 161541759  | 161550623 | 2478  |



| PARAM      | logFC       | pval        | pval.adj    | UPDOWN | desc                                                                                                | chr   | start     | end       | size |
|------------|-------------|-------------|-------------|--------|-----------------------------------------------------------------------------------------------------|-------|-----------|-----------|------|
| TRIM21     | 0.600649481 | 3.22496E-65 | 2.58725E-63 | UP     | tripartite motif containing 21 [Source:HGNC Symbol;Acc:HGNC:11312]                                  | chr11 | 4384902   | 4393696   | 1924 |
| IGSF6      | 1.214351413 | 5.5533E-65  | 4.43554E-63 | UP     | immunoglobulin superfamily member 6 [Source:HGNC Symbol;Acc:HGNC:5953]                              | chr16 | 21639537  | 21652660  | 2785 |
| PSTPIP1    | 1.160322075 | 6.27664E-65 | 4.9913E-63  | UP     | proline-serine-threonine phosphatase interacting protein 1 [Source:HGNC Symbol;Acc:HGNC:9580]       | chr15 | 76995085  | 77037332  | 1930 |
| IGHG1      | 2.712929197 | 7.06624E-65 | 5.59467E-63 | UP     | immunoglobulin heavy constant gamma 1 (G1m marker) [Source:HGNC Symbol;Acc:HGNC:5525]               | chr14 | 105736343 | 105743071 | 2619 |
| AC067945.1 | 1.299362272 | 8.83072E-65 | 6.96129E-63 | UP     |                                                                                                     | chr2  | 190992639 | 190993567 | 618  |
| CSF2RB     | 1.200904057 | 9.40837E-65 | 7.38455E-63 | UP     | colony stimulating factor 2 receptor beta common subunit [Source:HGNC Symbol;Acc:HGNC:2436]         | chr22 | 36913628  | 36940449  | 4881 |
| IGLV3-1    | 2.906565019 | 1.16514E-64 | 9.10565E-63 | UP     | immunoglobulin lambda variable 3-1 [Source:HGNC Symbol;Acc:HGNC:5896]                               | chr22 | 22880706  | 22881396  | 398  |
| ITGA4      | 0.901259639 | 1.18868E-64 | 9.24974E-63 | UP     | integrin subunit alpha 4 [Source:HGNC Symbol;Acc:HGNC:6140]                                         | chr2  | 181457207 | 181536187 | 4606 |
| GRAP2      | 1.245928508 | 1.62561E-64 | 1.25957E-62 | UP     | GRB2-related adaptor protein 2 [Source:HGNC Symbol;Acc:HGNC:4563]                                   | chr22 | 39901082  | 39973721  | 4169 |
| TRAV12-3   | 1.842111417 | 2.0862E-64  | 1.60957E-62 | UP     | T-cell receptor alpha variable 12-3 [Source:HGNC Symbol;Acc:HGNC:12107]                             | chr14 | 21965451  | 21966061  | 399  |
| NCF1       | 1.440531736 | 2.33183E-64 | 1.79146E-62 | UP     | neutrophil cytosolic factor 1 [Source:HGNC Symbol;Acc:HGNC:7660]                                    | chr7  | 74773962  | 74789313  | 1396 |
| IGHV3-21   | 3.021149758 | 3.12894E-64 | 2.39371E-62 | UP     | immunoglobulin heavy variable 3-21 [Source:HGNC Symbol;Acc:HGNC:5586]                               | chr14 | 106235064 | 106235594 | 430  |
| TRBV9      | 1.719224863 | 3.36622E-64 | 2.56441E-62 | UP     | T-cell receptor beta variable 9 [Source:HGNC Symbol;Acc:HGNC:12246]                                 | chr7  | 142391891 | 142392412 | 390  |
| DOCK10     | 0.975637114 | 3.89937E-64 | 2.95814E-62 | UP     | dedicator of cytokinesis 10 [Source:HGNC Symbol;Acc:HGNC:23479]                                     | chr2  | 224765090 | 225042442 | 7479 |
| CD80       | 1.298324771 | 6.12649E-64 | 4.62831E-62 | UP     | CD80 molecule [Source:HGNC Symbol;Acc:HGNC:1700]                                                    | chr3  | 119524293 | 119559602 | 2994 |
| IGHV3-23   | 2.805934186 | 8.20994E-64 | 6.17653E-62 | UP     | immunoglobulin heavy variable 3-23 [Source:HGNC Symbol;Acc:HGNC:5588]                               | chr14 | 106268606 | 106269140 | 432  |
| EVI2B      | 1.258168243 | 1.14463E-63 | 8.57572E-62 | UP     | ecotropic viral integration site 2B [Source:HGNC Symbol;Acc:HGNC:3500]                              | chr17 | 31303766  | 31314112  | 2072 |
| RUNX3      | 1.270986307 | 1.60472E-63 | 1.19733E-61 | UP     | runt related transcription factor 3 [Source:HGNC Symbol;Acc:HGNC:10473]                             | chr1  | 24899511  | 24965010  | 4365 |
| IGLC2      | 2.512424837 | 1.65788E-63 | 1.23193E-61 | UP     | immunoglobulin lambda constant 2 [Source:HGNC Symbol;Acc:HGNC:5856]                                 | chr22 | 22900976  | 22901437  | 462  |
| DDX60      | 0.956753062 | 3.20709E-63 | 2.37338E-61 | UP     | DExD/H-box helicase 60 [Source:HGNC Symbol;Acc:HGNC:25942]                                          | chr4  | 168216293 | 168318807 | 6071 |
| HLA-DRB1   | 1.220615409 | 3.46702E-63 | 2.55531E-61 | UP     | major histocompatibility complex, class II, DR beta 1 [Source:HGNC Symbol;Acc:HGNC:4948]            | chr6  | 32578769  | 32589848  | 1229 |
| BATF2      | 1.532098565 | 6.74877E-63 | 4.95392E-61 | UP     | basic leucine zipper ATF-like transcription factor 2 [Source:HGNC Symbol;Acc:HGNC:25163]            | chr11 | 64987943  | 64997045  | 2343 |
| FERMT3     | 0.952894469 | 6.9894E-63  | 5.10987E-61 | UP     | fermitin family member 3 [Source:HGNC Symbol;Acc:HGNC:23151]                                        | chr11 | 64206734  | 64223886  | 2493 |
| TRBV6-5    | 1.957992988 | 8.05781E-63 | 5.86732E-61 | UP     | T-cell receptor beta variable 6-5 [Source:HGNC Symbol;Acc:HGNC:12230]                               | chr7  | 142450947 | 142451448 | 410  |
| ETV7       | 1.149958068 | 9.55776E-63 | 6.93167E-61 | UP     | ETS variant 7 [Source:HGNC Symbol;Acc:HGNC:18160]                                                   | chr6  | 36354091  | 36387800  | 2374 |
| HNRNPA1P21 | 1.627187954 | 1.01789E-62 | 7.35277E-61 | UP     | heterogeneous nuclear ribonucleoprotein A1 pseudogene 21 [Source:HGNC Symbol;Acc:HGNC:39539]        | chr3  | 39334979  | 39335939  | 961  |
| ADA2       | 1.007890429 | 1.17382E-62 | 8.44548E-61 | UP     | adenosine deaminase 2 [Source:HGNC Symbol;Acc:HGNC:1839]                                            | chr22 | 17178990  | 17221989  | 5169 |
| TRIM22     | 0.973101303 | 1.21708E-62 | 8.72208E-61 | UP     | tripartite motif containing 22 [Source:HGNC Symbol;Acc:HGNC:16379]                                  | chr11 | 5689689   | 5710863   | 2989 |
| TRAF3IP3   | 1.297312211 | 1.52132E-62 | 1.08594E-60 | UP     | TRAF3 interacting protein 3 [Source:HGNC Symbol;Acc:HGNC:30766]                                     | chr1  | 209756032 | 209782320 | 3077 |
| KLRC2      | 2.105212201 | 1.7104E-62  | 1.21613E-60 | UP     | killer cell lectin like receptor C2 [Source:HGNC Symbol;Acc:HGNC:6375]                              | chr12 | 10430599  | 10442300  | 1401 |
| CD52       | 1.358144681 | 2.03281E-62 | 1.43972E-60 | UP     | CD52 molecule [Source:HGNC Symbol;Acc:HGNC:1804]                                                    | chr1  | 26317957  | 26320523  | 468  |
| PTPRCAP    | 1.180383963 | 2.27086E-62 | 1.60206E-60 | UP     | protein tyrosine phosphatase, receptor type C associated protein [Source:HGNC Symbol;Acc:HGNC:9667] | chr11 | 67435510  | 67438067  | 1292 |
| SLC15A3    | 0.929942739 | 2.39116E-62 | 1.68039E-60 | UP     | solute carrier family 15 member 3 [Source:HGNC Symbol;Acc:HGNC:18068]                               | chr11 | 60937084  | 60951785  | 2115 |
| IGLV2-14   | 2.763370528 | 2.75055E-62 | 1.92549E-60 | UP     | immunoglobulin lambda variable 2-14 [Source:HGNC Symbol;Acc:HGNC:5888]                              | chr22 | 22758700  | 22759218  | 402  |
| HEATR9     | 1.75816339  | 4.21814E-62 | 2.9415E-60  | UP     | HEAT repeat containing 9 [Source:HGNC Symbol;Acc:HGNC:26548]                                        | chr17 | 35854951  | 35868891  | 1974 |
| JAK3       | 0.991095293 | 6.19723E-62 | 4.30505E-60 | UP     | Janus kinase 3 [Source:HGNC Symbol;Acc:HGNC:6193]                                                   | chr19 | 17824786  | 17848032  | 5769 |
| MYO1G      | 1.163004724 | 6.22847E-62 | 4.31024E-60 | UP     | myosin IG [Source:HGNC Symbol;Acc:HGNC:13880]                                                       | chr7  | 44962666  | 44979098  | 3267 |
| FCRL3      | 1.969152461 | 6.71385E-62 | 4.62847E-60 | UP     | Fc receptor like 3 [Source:HGNC Symbol;Acc:HGNC:18506]                                              | chr1  | 157676481 | 157700857 | 4726 |
| DOK2       | 1.137168343 | 7.21217E-62 | 4.95318E-60 | UP     | docking protein 2 [Source:HGNC Symbol;Acc:HGNC:2991]                                                | chr8  | 21908873  | 21913860  | 1936 |
| ISG20      | 1.105509521 | 8.4013E-62  | 5.74808E-60 | UP     | interferon stimulated exonuclease gene 20 [Source:HGNC Symbol;Acc:HGNC:6130]                        | chr15 | 88636153  | 88656483  | 2148 |
| TRAV4      | 1.732310833 | 1.18153E-61 | 8.05347E-60 | UP     | T-cell receptor alpha variable 4 [Source:HGNC Symbol;Acc:HGNC:12140]                                | chr14 | 21736152  | 21736982  | 395  |
| LILRB2     | 1.175195669 | 1.29779E-61 | 8.81281E-60 | UP     | leukocyte immunoglobulin like receptor B2 [Source:HGNC Symbol;Acc:HGNC:6606]                        | chr19 | 54273821  | 54281184  | 3011 |
| IGHV3-30   | 2.921409826 | 1.30532E-61 | 8.83088E-60 | UP     | immunoglobulin heavy variable 3-30 [Source:HGNC Symbol;Acc:HGNC:5591]                               | chr14 | 106335082 | 106335613 | 431  |
| IGKV1-5    | 2.723841133 | 1.5094E-61  | 1.01736E-59 | UP     | immunoglobulin kappa variable 1-5 [Source:HGNC Symbol;Acc:HGNC:5741]                                | chr2  | 88947301  | 88947957  | 532  |
| ABI3       | 0.974453917 | 2.41929E-61 | 1.6246E-59  | UP     | ABI family member 3 [Source:HGNC Symbol;Acc:HGNC:29859]                                             | chr17 | 49212027  | 49223225  | 2109 |
| SNX10      | 1.047361177 | 3.043E-61   | 2.03589E-59 | UP     | sorting nexin 10 [Source:HGNC Symbol;Acc:HGNC:14974]                                                | chr7  | 26291895  | 26374329  | 3060 |
| TRBV4-1    | 1.950422426 | 3.57682E-61 | 2.38424E-59 | UP     | T-cell receptor beta variable 4-1 [Source:HGNC Symbol;Acc:HGNC:12215]                               | chr7  | 142313184 | 142313666 | 373  |
| MS4A6A     | 1.0268376   | 3.6035E-61  | 2.39323E-59 | UP     | membrane spanning 4-domains A6A [Source:HGNC Symbol;Acc:HGNC:13375]                                 | chr11 | 60172014  | 60184666  | 2767 |
| TRAV3      | 1.660524807 | 5.79838E-61 | 3.88688E-59 | UP     | T-cell receptor alpha variable 3 (gene/pseudogene) [Source:HGNC Symbol;Acc:HGNC:12128]              | chr14 | 21723713  | 21724321  | 519  |
| PATL2      | 1.126140631 | 6.27607E-61 | 4.13787E-59 | UP     | PAT1 homolog 2 [Source:HGNC Symbol;Acc:HGNC:33630]                                                  | chr15 | 44665732  | 44676888  | 2153 |
| LAPTM5     | 1.008310234 | 1.02219E-60 | 6.71499E-59 | UP     | lysosomal protein transmembrane 5 [Source:HGNC Symbol;Acc:HGNC:29612]                               | chr1  | 30732469  | 30757820  | 2223 |
| IGLV3-25   | 2.89997266  | 1.08682E-60 | 7.11374E-59 | UP     | immunoglobulin lambda variable 3-25 [Source:HGNC Symbol;Acc:HGNC:5908]                              | chr22 | 22687269  | 22687271  | 380  |
| TRAV21     | 1.691032287 | 1.17173E-60 | 7.64194E-59 | UP     | T-cell receptor alpha variable 21 [Source:HGNC Symbol;Acc:HGNC:12118]                               | chr14 | 22052514  | 22053056  | 343  |
| STAT4      | 1.03886877  | 1.68752E-60 | 1.0965E-58  | UP     | signal transducer and activator of transcription 4 [Source:HGNC Symbol;Acc:HGNC:11365]              | chr2  | 191029576 | 191151900 | 3493 |
| MZB1       | 2.188256506 | 1.71084E-60 | 1.10783E-58 | UP     | marginal zone B and B1 cell specific protein [Source:HGNC Symbol;Acc:HGNC:30125]                    | chr5  | 139387568 | 139389914 | 825  |
| AIM2       | 1.828904091 | 1.77217E-60 | 1.14346E-58 | UP     | absent in melanoma 2 [Source:HGNC Symbol;Acc:HGNC:357]                                              | chr1  | 159062484 | 159076901 | 1529 |
| KCNJ10     | 2.266967357 | 2.42112E-60 | 1.55665E-58 | UP     | potassium voltage-gated channel subfamily J member 10 [Source:HGNC Symbol;Acc:HGNC:6256]            | chr1  | 159998651 | 160070483 | 6575 |

| PARAM    | logFC       | pval        | pval.adj    | UPDOWN | desc                                                                                                                       | chr   | start     | end       | size |
|----------|-------------|-------------|-------------|--------|----------------------------------------------------------------------------------------------------------------------------|-------|-----------|-----------|------|
| RHOH     | 1.430464268 | 4.48605E-60 | 2.87409E-58 | UP     | ras homology family member H [Source:HGNC Symbol;Acc:HGNC:686]                                                             | chr4  | 40191053  | 40246967  | 5440 |
| SNX20    | 1.336551763 | 6.49957E-60 | 4.14943E-58 | UP     | sorting nexin 20 [Source:HGNC Symbol;Acc:HGNC:30390]                                                                       | chr16 | 50666300  | 50681353  | 5754 |
| IGHV5-51 | 2.828723834 | 1.23009E-59 | 7.82555E-58 | UP     | immunoglobulin heavy variable 5-51 [Source:HGNC Symbol;Acc:HGNC:5659]                                                      | chr14 | 106578744 | 106579236 | 410  |
| TYROBP   | 1.091637219 | 1.29951E-59 | 8.23827E-58 | UP     | TYRO protein tyrosine kinase binding protein [Source:HGNC Symbol;Acc:HGNC:12449]                                           | chr19 | 35904401  | 35908295  | 670  |
| IGKV3-20 | 2.607301646 | 1.40229E-59 | 8.85884E-58 | UP     | immunoglobulin kappa variable 3-20 [Source:HGNC Symbol;Acc:HGNC:5817]                                                      | chr2  | 89142574  | 89143160  | 400  |
| IGKV4-1  | 2.611738438 | 1.41464E-59 | 8.90586E-58 | UP     | immunoglobulin kappa variable 4-1 [Source:HGNC Symbol;Acc:HGNC:5834]                                                       | chr2  | 88885397  | 88886153  | 538  |
| BTN3A2   | 0.821864118 | 1.73664E-59 | 1.08952E-57 | UP     | butyrophilin subfamily 3 member A2 [Source:HGNC Symbol;Acc:HGNC:11319]                                                     | chr6  | 26365159  | 26378320  | 4120 |
| TOMM20P2 | 1.576987899 | 1.80554E-59 | 1.12883E-57 | UP     | TOMM20 pseudogene 2 [Source:HGNC Symbol;Acc:HGNC:50519]                                                                    | chr17 | 35514766  | 35515186  | 421  |
| PIM2     | 1.213624532 | 1.95529E-59 | 1.21826E-57 | UP     | Pim-2 proto-oncogene, serine/threonine kinase [Source:HGNC Symbol;Acc:HGNC:8987]                                           | chrX  | 48913182  | 48919024  | 2075 |
| TBC1D10C | 1.380672443 | 2.20242E-59 | 1.36754E-57 | UP     | TBC1 domain family member 10C [Source:HGNC Symbol;Acc:HGNC:24702]                                                          | chr11 | 67403915  | 67410089  | 1718 |
| LCP1     | 1.018942601 | 3.13428E-59 | 1.93754E-57 | UP     | lymphocyte cytosolic protein 1 [Source:HGNC Symbol;Acc:HGNC:6528]                                                          | chr13 | 46125920  | 46211348  | 4043 |
| IGKC     | 2.381042633 | 3.14178E-59 | 1.93754E-57 | UP     | immunoglobulin kappa constant [Source:HGNC Symbol;Acc:HGNC:5716]                                                           | chr2  | 88857161  | 88857683  | 523  |
| BTk      | 1.048989697 | 3.33816E-59 | 2.05167E-57 | UP     | Bruton tyrosine kinase [Source:HGNC Symbol;Acc:HGNC:1133]                                                                  | chrX  | 101349447 | 101390796 | 3095 |
| HCK      | 1.045056587 | 3.60754E-59 | 2.20974E-57 | UP     | HCK proto-oncogene, Src family tyrosine kinase [Source:HGNC Symbol;Acc:HGNC:4840]                                          | chr20 | 32052188  | 32101856  | 2219 |
| IGHM     | 2.375856052 | 3.63114E-59 | 2.21671E-57 | UP     | immunoglobulin heavy constant mu [Source:HGNC Symbol;Acc:HGNC:5541]                                                        | chr14 | 105851708 | 105856218 | 1683 |
| SRGN     | 1.127329966 | 4.26153E-59 | 2.59281E-57 | UP     | serglycin [Source:HGNC Symbol;Acc:HGNC:9361]                                                                               | chr10 | 69088118  | 69104811  | 1208 |
| IGKV3-15 | 2.725239145 | 4.2789E-59  | 2.59467E-57 | UP     | immunoglobulin kappa variable 3-15 [Source:HGNC Symbol;Acc:HGNC:5816]                                                      | chr2  | 89085177  | 89085787  | 442  |
| TRAV26-1 | 1.609687948 | 5.89071E-59 | 3.56015E-57 | UP     | T-cell receptor alpha variable 26-1 [Source:HGNC Symbol;Acc:HGNC:12123]                                                    | chr14 | 22123318  | 22124285  | 537  |
| RAC2     | 1.025550831 | 6.15339E-59 | 3.70655E-57 | UP     | ras-related C3 botulinum toxin substrate 2 (rho family, small GTP binding protein Rac2) [Source:HGNC Symbol;Acc:HGNC:9802] | chr22 | 37225261  | 37244448  | 2022 |
| HAPLN3   | 1.170191712 | 8.3963E-59  | 5.04084E-57 | UP     | hyaluronan and proteoglycan link protein 3 [Source:HGNC Symbol;Acc:HGNC:21446]                                             | chr15 | 88877288  | 88895626  | 2119 |
| IGHV1-18 | 2.831537695 | 8.67116E-59 | 5.18867E-57 | UP     | immunoglobulin heavy variable 1-18 [Source:HGNC Symbol;Acc:HGNC:5549]                                                      | chr14 | 106184901 | 106185394 | 410  |
| JAK2     | 0.682951469 | 1.03414E-58 | 6.16775E-57 | UP     | Janus kinase 2 [Source:HGNC Symbol;Acc:HGNC:6192]                                                                          | chr9  | 4985245   | 5128183   | 5285 |
| IFIT5    | 0.617496985 | 1.0626E-58  | 6.31673E-57 | UP     | interferon induced protein with tetratricopeptide repeats 5 [Source:HGNC Symbol;Acc:HGNC:13328]                            | chr10 | 89414586  | 89421001  | 4015 |
| TRBV6-6  | 1.74619935  | 1.30224E-58 | 7.716E-57   | UP     | T-cell receptor beta variable 6-6 [Source:HGNC Symbol;Acc:HGNC:12231]                                                      | chr7  | 142469537 | 142470013 | 388  |
| IGHV1-46 | 2.845625332 | 1.43576E-58 | 8.47941E-57 | UP     | immunoglobulin heavy variable 1-46 [Source:HGNC Symbol;Acc:HGNC:5554]                                                      | chr14 | 106511117 | 106511856 | 655  |
| CTSS     | 0.928548575 | 2.30582E-58 | 1.35737E-56 | UP     | cathepsin 5 [Source:HGNC Symbol;Acc:HGNC:2545]                                                                             | chr1  | 150730196 | 150765957 | 4107 |
| TRBV3-1  | 1.604936591 | 2.33669E-58 | 1.37108E-56 | UP     | T-cell receptor beta variable 3-1 [Source:HGNC Symbol;Acc:HGNC:12212]                                                      | chr7  | 142308542 | 142309048 | 391  |
| MVO7A    | 1.05066958  | 2.3833E-58  | 1.39392E-56 | UP     | myosin VIIA [Source:HGNC Symbol;Acc:HGNC:7606]                                                                             | chr11 | 77128264  | 77215238  | 7832 |
| SH2D2A   | 1.001395081 | 2.69792E-58 | 1.57286E-56 | UP     | SH2 domain containing 2A [Source:HGNC Symbol;Acc:HGNC:10821]                                                               | chr1  | 156806243 | 156816862 | 1688 |
| LYZ      | 1.420370459 | 3.41121E-58 | 1.98233E-56 | UP     | lysozyme [Source:HGNC Symbol;Acc:HGNC:6740]                                                                                | chr12 | 69348341  | 69354234  | 1764 |
| SELP1G   | 1.006670272 | 3.81582E-58 | 2.21037E-56 | UP     | selectin P ligand [Source:HGNC Symbol;Acc:HGNC:10722]                                                                      | chr12 | 108622277 | 108633959 | 2494 |
| RASGRP1  | 1.205712534 | 3.93927E-58 | 2.27462E-56 | UP     | RAS guanyl releasing protein 1 [Source:HGNC Symbol;Acc:HGNC:9878]                                                          | chr15 | 38488103  | 38565575  | 5304 |
| LTA      | 1.560144997 | 4.82128E-58 | 2.77507E-56 | UP     | lymphotoxin alpha [Source:HGNC Symbol;Acc:HGNC:6709]                                                                       | chr6  | 31572054  | 31574324  | 1651 |
| PIK3CD   | 0.885162785 | 5.77013E-58 | 3.3107E-56  | UP     | phosphatidylinositol-4,5-bisphosphate 3-kinase catalytic subunit delta [Source:HGNC Symbol;Acc:HGNC:8977]                  | chr1  | 9651732   | 9729114   | 5673 |
| HLA-C    | 0.920643999 | 5.84858E-58 | 3.34513E-56 | UP     | major histocompatibility complex, class I, C [Source:HGNC Symbol;Acc:HGNC:4933]                                            | chr6  | 31268749  | 31272086  | 1554 |
| TRAV8-6  | 1.774410004 | 6.06019E-58 | 3.45526E-56 | UP     | T-cell receptor alpha variable 8-6 [Source:HGNC Symbol;Acc:HGNC:12151]                                                     | chr14 | 21978459  | 21979120  | 561  |
| SPN      | 1.228158824 | 7.68436E-58 | 4.36756E-56 | UP     | sialophorin [Source:HGNC Symbol;Acc:HGNC:11249]                                                                            | chr16 | 29662979  | 29670490  | 6996 |
| XAF1     | 0.951788748 | 1.53055E-57 | 8.67203E-56 | UP     | XIAP associated factor 1 [Source:HGNC Symbol;Acc:HGNC:30932]                                                               | chr17 | 6755838   | 6775647   | 3625 |
| JCHAIN   | 2.077964954 | 1.87814E-57 | 1.06083E-55 | UP     | joining chain of multimeric IgA and IgM [Source:HGNC Symbol;Acc:HGNC:5713]                                                 | chr4  | 70655541  | 70666975  | 1565 |
| OAS2     | 1.114741096 | 2.19942E-57 | 1.23844E-55 | UP     | 2'-5'-oligoadenylate synthetase 2 [Source:HGNC Symbol;Acc:HGNC:8087]                                                       | chr12 | 112978395 | 113011723 | 6243 |
| SPI1     | 1.010262569 | 2.30293E-57 | 1.29271E-55 | UP     | Spi-1 proto-oncogene [Source:HGNC Symbol;Acc:HGNC:11241]                                                                   | chr11 | 47354860  | 47378576  | 2069 |
| IGHV3-33 | 2.690840179 | 2.54503E-57 | 1.4242E-55  | UP     | immunoglobulin heavy variable 3-33 [Source:HGNC Symbol;Acc:HGNC:5596]                                                      | chr14 | 106359793 | 106360324 | 431  |
| CD96     | 1.132641596 | 2.77291E-57 | 1.54694E-55 | UP     | CD96 molecule [Source:HGNC Symbol;Acc:HGNC:16892]                                                                          | chr3  | 111542009 | 111652372 | 4850 |
| SCIMP    | 1.350527112 | 2.94292E-57 | 1.63675E-55 | UP     | SLP adaptor and CSK interacting membrane protein [Source:HGNC Symbol;Acc:HGNC:33504]                                       | chr17 | 5208961   | 5234860   | 4208 |
| IGHV3-48 | 2.762672591 | 3.99732E-57 | 2.21637E-55 | UP     | immunoglobulin heavy variable 3-48 [Source:HGNC Symbol;Acc:HGNC:5606]                                                      | chr14 | 106537810 | 106538344 | 432  |
| TRIM69   | 0.921382411 | 4.05485E-57 | 2.24142E-55 | UP     | tripartite motif containing 69 [Source:HGNC Symbol;Acc:HGNC:17857]                                                         | chr15 | 44728988  | 44767829  | 2496 |
| IGKV3-11 | 2.6600227   | 5.72963E-57 | 3.15757E-55 | UP     | immunoglobulin kappa variable 3-11 [Source:HGNC Symbol;Acc:HGNC:5815]                                                      | chr2  | 89027171  | 89027731  | 392  |
| PVRIG    | 1.500765878 | 7.68936E-57 | 4.22472E-55 | UP     | poliovirus receptor related immunoglobulin domain containing [Source:HGNC Symbol;Acc:HGNC:32190]                           | chr7  | 100219236 | 100221490 | 1583 |
| GZMM     | 1.445224361 | 8.17949E-57 | 4.48043E-55 | UP     | granzyme M [Source:HGNC Symbol;Acc:HGNC:4712]                                                                              | chr19 | 544034    | 549924    | 945  |
| CYTH4    | 0.980716542 | 9.40137E-57 | 5.13422E-55 | UP     | cytohesin 4 [Source:HGNC Symbol;Acc:HGNC:9505]                                                                             | chr22 | 37282383  | 37315345  | 3408 |
| RASSF4   | 0.960365845 | 1.06191E-56 | 5.78182E-55 | UP     | Ras association domain family member 4 [Source:HGNC Symbol;Acc:HGNC:20793]                                                 | chr10 | 44959792  | 44995891  | 3641 |
| LAIR1    | 1.015320087 | 1.08704E-56 | 5.90096E-55 | UP     | leukocyte associated immunoglobulin like receptor 1 [Source:HGNC Symbol;Acc:HGNC:6477]                                     | chr19 | 54351384  | 54370558  | 5236 |
| IGHV3-15 | 2.622716728 | 1.25614E-56 | 6.79853E-55 | UP     | immunoglobulin heavy variable 3-15 [Source:HGNC Symbol;Acc:HGNC:5582]                                                      | chr14 | 106153624 | 106154163 | 437  |
| LY9      | 1.46492109  | 1.51042E-56 | 8.15042E-55 | UP     | lymphocyte antigen 9 [Source:HGNC Symbol;Acc:HGNC:6730]                                                                    | chr1  | 160796074 | 160828261 | 3436 |
| GPR132   | 1.158519139 | 1.63816E-56 | 8.81348E-55 | UP     | G protein-coupled receptor 132 [Source:HGNC Symbol;Acc:HGNC:17482]                                                         | chr14 | 105049389 | 105065445 | 3765 |
| IGHV4-59 | 2.749562539 | 1.6566E-56  | 8.88636E-55 | UP     | immunoglobulin heavy variable 4-59 [Source:HGNC Symbol;Acc:HGNC:5654]                                                      | chr14 | 106627249 | 106627825 | 495  |
| CR1L     | 1.803478187 | 1.69788E-56 | 9.08091E-55 | UP     | complement C3b/C4b receptor 1 like [Source:HGNC Symbol;Acc:HGNC:2335]                                                      | chr1  | 207645174 | 207723703 | 1788 |

| PARAM      | logFC       | pval        | pval.adj    | UPDOWN | desc                                                                                               | chr   | start     | end       | size  |
|------------|-------------|-------------|-------------|--------|----------------------------------------------------------------------------------------------------|-------|-----------|-----------|-------|
| HERC5      | 1.085161205 | 1.72792E-56 | 9.21438E-55 | UP     | HECT and RLD domain containing E3 ubiquitin protein ligase 5 [Source:HGNC Symbol;Acc:HGNC:24368]   | chr4  | 88457117  | 88506163  | 3594  |
| MPEG1      | 0.977901683 | 1.85249E-56 | 9.84973E-55 | UP     | macrophage expressed 1 [Source:HGNC Symbol;Acc:HGNC:29619]                                         | chr11 | 59208510  | 59212951  | 4442  |
| FCGR1A     | 1.483739883 | 2.22453E-56 | 1.17932E-54 | UP     | Fc fragment of IgG receptor Ia [Source:HGNC Symbol;Acc:HGNC:3613]                                  | chr1  | 149782690 | 149792518 | 2180  |
| TRBV29-1   | 1.710677458 | 2.24472E-56 | 1.18656E-54 | UP     | T-cell receptor beta variable 29-1 [Source:HGNC Symbol;Acc:HGNC:12210]                             | chr7  | 142740206 | 142740894 | 402   |
| CCL8       | 1.730409518 | 2.42847E-56 | 1.27996E-54 | UP     | C-C motif chemokine ligand 8 [Source:HGNC Symbol;Acc:HGNC:10635]                                   | chr17 | 34319036  | 34321402  | 1261  |
| P2RX7      | 1.078968276 | 2.56354E-56 | 1.34723E-54 | UP     | purinergic receptor P2X 7 [Source:HGNC Symbol;Acc:HGNC:8537]                                       | chr12 | 121132828 | 121188032 | 5161  |
| AOAH       | 1.116761422 | 5.68488E-56 | 2.97898E-54 | UP     | acyloxacyl hydrolase [Source:HGNC Symbol;Acc:HGNC:548]                                             | chr7  | 36512949  | 36724549  | 2551  |
| TRBV2      | 1.647366885 | 6.10363E-56 | 3.18919E-54 | UP     | T-cell receptor beta variable 2 [Source:HGNC Symbol;Acc:HGNC:12195]                                | chr7  | 142300924 | 142301432 | 421   |
| IGHG3      | 2.559389665 | 7.59741E-56 | 3.95829E-54 | UP     | immunoglobulin heavy constant gamma 3 (G3m marker) [Source:HGNC Symbol;Acc:HGNC:5527]              | chr14 | 105764503 | 105771405 | 2751  |
| WIPF1      | 0.843143742 | 8.87733E-56 | 4.61189E-54 | UP     | WAS/WASL interacting protein family member 1 [Source:HGNC Symbol;Acc:HGNC:12736]                   | chr2  | 174559572 | 174682899 | 6635  |
| BCL2A1     | 1.523339685 | 9.05185E-56 | 4.68912E-54 | UP     | BCL2 related protein A1 [Source:HGNC Symbol;Acc:HGNC:991]                                          | chr15 | 79960889  | 79971446  | 1089  |
| CCR2       | 1.373907395 | 9.50768E-56 | 4.91122E-54 | UP     | C-C motif chemokine receptor 2 [Source:HGNC Symbol;Acc:HGNC:1603]                                  | chr3  | 46353734  | 46360928  | 3638  |
| PIK3AP1    | 1.043220149 | 1.02693E-55 | 5.28955E-54 | UP     | phosphoinositide-3-kinase adaptor protein 1 [Source:HGNC Symbol;Acc:HGNC:30034]                    | chr10 | 96593312  | 96720514  | 5238  |
| ANKRD36BP2 | 1.854248748 | 1.11209E-55 | 5.71198E-54 | UP     | ankyrin repeat domain 36B pseudogene 2 [Source:HGNC Symbol;Acc:HGNC:33607]                         | chr2  | 88765807  | 88806612  | 7032  |
| IGLL5      | 2.389089772 | 1.2514E-55  | 6.39641E-54 | UP     | immunoglobulin lambda like polypeptide 5 [Source:HGNC Symbol;Acc:HGNC:38476]                       | chr22 | 22887780  | 22896107  | 1335  |
| C3AR1      | 1.025371958 | 1.25407E-55 | 6.39641E-54 | UP     | complement C3a receptor 1 [Source:HGNC Symbol;Acc:HGNC:1319]                                       | chr12 | 8058302   | 8066471   | 2088  |
| CLECTA     | 1.169021455 | 1.25593E-55 | 6.39641E-54 | UP     | C-type lectin domain containing 7A [Source:HGNC Symbol;Acc:HGNC:14558]                             | chr12 | 10116777  | 10130257  | 3017  |
| IGKV2-28   | 2.659511882 | 1.58203E-55 | 8.03467E-54 | UP     | immunoglobulin kappa variable 2-28 [Source:HGNC Symbol;Acc:HGNC:5783]                              | chr2  | 89221698  | 89222461  | 390   |
| TRAV13-2   | 1.542301091 | 2.33769E-55 | 1.18393E-53 | UP     | T-cell receptor alpha variable 13-2 [Source:HGNC Symbol;Acc:HGNC:12109]                            | chr14 | 21918188  | 21918756  | 410   |
| NCF1B      | 1.475174403 | 2.42099E-55 | 1.2227E-53  | UP     | neutrophil cytosolic factor 1B pseudogene [Source:HGNC Symbol;Acc:HGNC:32522]                      | chr7  | 73220624  | 73235945  | 1902  |
| GIMAP5     | 1.210922032 | 3.12876E-55 | 1.57576E-53 | UP     | GTPase, IMAP family member 5 [Source:HGNC Symbol;Acc:HGNC:18005]                                   | chr7  | 150722253 | 150744063 | 2409  |
| CCR8       | 1.515368529 | 3.662E-55   | 1.83922E-53 | UP     | C-C motif chemokine receptor 8 [Source:HGNC Symbol;Acc:HGNC:1609]                                  | chr3  | 39329706  | 39333511  | 1318  |
| IGHV4-34   | 2.632469224 | 4.78211E-55 | 2.39515E-53 | UP     | immunoglobulin heavy variable 4-34 [Source:HGNC Symbol;Acc:HGNC:5650]                              | chr14 | 106373663 | 106374145 | 400   |
| TLR1       | 0.91361413  | 5.101E-55   | 2.54783E-53 | UP     | toll like receptor 1 [Source:HGNC Symbol;Acc:HGNC:11847]                                           | chr4  | 38796257  | 38804791  | 2849  |
| TRAV2      | 1.716418032 | 7.53153E-55 | 3.75149E-53 | UP     | T-cell receptor alpha variable 2 [Source:HGNC Symbol;Acc:HGNC:12116]                               | chr14 | 21712321  | 21712843  | 348   |
| ST8SIA4    | 0.88026312  | 1.05007E-54 | 5.21611E-53 | UP     | ST8 alpha-N-acetyl-neuraminidase alpha-2,8-sialyltransferase 4 [Source:HGNC Symbol;Acc:HGNC:10871] | chr5  | 100806935 | 100903266 | 7335  |
| THEMIS2    | 0.965637362 | 1.36872E-54 | 6.78038E-53 | UP     | thymocyte selection associated family member 2 [Source:HGNC Symbol;Acc:HGNC:16839]                 | chr1  | 27872543  | 27886685  | 2724  |
| IFIT2      | 1.02857344  | 1.76627E-54 | 8.72596E-53 | UP     | interferon induced protein with tetratricopeptide repeats 2 [Source:HGNC Symbol;Acc:HGNC:5409]     | chr10 | 89283694  | 89309276  | 4101  |
| MYO1F      | 0.926151649 | 2.19755E-54 | 1.08271E-52 | UP     | myosin IF [Source:HGNC Symbol;Acc:HGNC:7600]                                                       | chr19 | 8520790   | 8577577   | 4309  |
| IGLV1-47   | 2.717275431 | 2.22196E-54 | 1.09177E-52 | UP     | immunoglobulin lambda variable 1-47 [Source:HGNC Symbol;Acc:HGNC:5880]                             | chr22 | 22357739  | 22358260  | 407   |
| TRAV9-2    | 1.699717488 | 2.96075E-54 | 1.45085E-52 | UP     | T-cell receptor alpha variable 9-2 [Source:HGNC Symbol;Acc:HGNC:12154]                             | chr14 | 21941128  | 21941657  | 394   |
| IGLV1-44   | 2.622275788 | 3.19006E-54 | 1.559E-52   | UP     | immunoglobulin lambda variable 1-44 [Source:HGNC Symbol;Acc:HGNC:5879]                             | chr22 | 22380766  | 22381347  | 467   |
| IGLV3-19   | 2.756169506 | 3.58957E-54 | 1.74953E-52 | UP     | immunoglobulin lambda variable 3-19 [Source:HGNC Symbol;Acc:HGNC:5903]                             | chr22 | 22720623  | 22721145  | 377   |
| CD37       | 1.14702091  | 5.71615E-54 | 2.77854E-52 | UP     | CD37 molecule [Source:HGNC Symbol;Acc:HGNC:1666]                                                   | chr19 | 49335396  | 49340606  | 2061  |
| IGLV2-23   | 2.620445866 | 7.6762E-54  | 3.72132E-52 | UP     | immunoglobulin lambda variable 2-23 [Source:HGNC Symbol;Acc:HGNC:5890]                             | chr22 | 22697789  | 22698407  | 502   |
| IGKV1D-39  | 2.553962604 | 8.97134E-54 | 4.33758E-52 | UP     | immunoglobulin kappa variable 1D-39 [Source:HGNC Symbol;Acc:HGNC:5756]                             | chr2  | 89862482  | 89862981  | 376   |
| TRAV8-4    | 1.786557971 | 1.3792E-53  | 6.65058E-52 | UP     | T-cell receptor alpha variable 8-4 [Source:HGNC Symbol;Acc:HGNC:12149]                             | chr14 | 21894433  | 21895030  | 469   |
| RNF213     | 0.632728932 | 1.66868E-53 | 8.02516E-52 | UP     | ring finger protein 213 [Source:HGNC Symbol;Acc:HGNC:14539]                                        | chr17 | 80260866  | 80398786  | 23355 |
| SLC7A7     | 1.018753536 | 1.80517E-53 | 8.65861E-52 | UP     | solute carrier family 7 member 7 [Source:HGNC Symbol;Acc:HGNC:11065]                               | chr14 | 22773222  | 22819811  | 2698  |
| GOLGA5P1   | 1.354809791 | 2.05751E-53 | 9.84295E-52 | UP     | golgin A5 pseudogene 1 [Source:HGNC Symbol;Acc:HGNC:43925]                                         | chr5  | 39169210  | 39170335  | 980   |
| TRGV2      | 1.905876316 | 2.78747E-53 | 1.32999E-51 | UP     | T-cell receptor gamma variable 2 [Source:HGNC Symbol;Acc:HGNC:12287]                               | chr7  | 38362864  | 38363518  | 544   |
| CD72       | 1.095398196 | 3.21811E-53 | 1.53143E-51 | UP     | CD72 molecule [Source:HGNC Symbol;Acc:HGNC:1696]                                                   | chr9  | 35609533  | 35619542  | 2675  |
| TIFA8      | 1.580138905 | 3.25529E-53 | 1.54507E-51 | UP     | TIFA inhibitor [Source:HGNC Symbol;Acc:HGNC:34024]                                                 | chr5  | 135444218 | 135452399 | 5923  |
| DDX58      | 0.764924558 | 3.31231E-53 | 1.56803E-51 | UP     | DEXD/H-box helicase 58 [Source:HGNC Symbol;Acc:HGNC:19102]                                         | chr9  | 32455705  | 32526324  | 4353  |
| IGHGP      | 2.677113295 | 3.65814E-53 | 1.72723E-51 | UP     | immunoglobulin heavy constant gamma P (non-functional) [Source:HGNC Symbol;Acc:HGNC:5529]          | chr14 | 105664633 | 105669843 | 1178  |
| TRAV6      | 1.549961771 | 3.94853E-53 | 1.8595E-51  | UP     | T-cell receptor alpha variable 6 [Source:HGNC Symbol;Acc:HGNC:12144]                               | chr14 | 21768489  | 21769080  | 404   |
| BTLA       | 1.52895171  | 3.96499E-53 | 1.86241E-51 | UP     | B and T lymphocyte associated [Source:HGNC Symbol;Acc:HGNC:21087]                                  | chr3  | 112463968 | 112499561 | 3213  |
| IRF8       | 1.072628713 | 4.1366E-53  | 1.938E-51   | UP     | interferon regulatory factor 8 [Source:HGNC Symbol;Acc:HGNC:5358]                                  | chr16 | 85898803  | 85922609  | 5194  |
| IFI44L     | 1.485399323 | 5.2654E-53  | 2.46049E-51 | UP     | interferon induced protein 44 like [Source:HGNC Symbol;Acc:HGNC:17817]                             | chr1  | 78620403  | 78646145  | 4874  |
| IGHV6-1    | 2.409402554 | 5.99243E-53 | 2.79303E-51 | UP     | immunoglobulin heavy variable 6-1 [Source:HGNC Symbol;Acc:HGNC:5662]                               | chr14 | 105939756 | 105940253 | 415   |
| CLECT1     | 1.472364047 | 8.42758E-53 | 3.91796E-51 | UP     | C-type lectin like 1 [Source:HGNC Symbol;Acc:HGNC:24462]                                           | chr12 | 9718685   | 9733299   | 760   |
| GPR18      | 1.62820402  | 1.02045E-52 | 4.73193E-51 | UP     | G protein-coupled receptor 18 [Source:HGNC Symbol;Acc:HGNC:4472]                                   | chr13 | 99254714  | 99261744  | 1908  |
| TRBV4-2    | 1.668458012 | 1.14267E-52 | 5.28514E-51 | UP     | T-cell receptor beta variable 4-2 [Source:HGNC Symbol;Acc:HGNC:12216]                              | chr7  | 142345421 | 142345985 | 455   |
| MB21D1     | 0.808850043 | 1.29688E-52 | 5.98314E-51 | UP     | Mab-21 domain containing 1 [Source:HGNC Symbol;Acc:HGNC:21367]                                     | chr6  | 73413515  | 73452276  | 3689  |
| FCRL5      | 2.199743913 | 1.66032E-52 | 7.64044E-51 | UP     | Fc receptor like 5 [Source:HGNC Symbol;Acc:HGNC:18508]                                             | chr1  | 157513377 | 157552520 | 8508  |
| IGLV3-10   | 2.908408147 | 1.67746E-52 | 7.69977E-51 | UP     | immunoglobulin lambda variable 3-10 [Source:HGNC Symbol;Acc:HGNC:5897]                             | chr22 | 22811747  | 22812281  | 382   |
| IGLV2-11   | 2.568517198 | 1.73836E-52 | 7.95913E-51 | UP     | immunoglobulin lambda variable 2-11 [Source:HGNC Symbol;Acc:HGNC:5887]                             | chr22 | 22792491  | 22793007  | 400   |

| PARAM      | logFC       | pval        | pval.adj    | UPDOWN | desc                                                                                                                      | chr        | start     | end       | size |
|------------|-------------|-------------|-------------|--------|---------------------------------------------------------------------------------------------------------------------------|------------|-----------|-----------|------|
| FAM78A     | 1.045820986 | 1.76176E-52 | 8.04598E-51 | UP     | family with sequence similarity 78 member A [Source:HGNC Symbol;Acc:HGNC:25465]                                           | chr9       | 131258076 | 131276547 | 4350 |
| AC23755.1  | 2.575702286 | 2.40743E-52 | 1.09671E-50 | UP     | immunoglobulin heavy variable 4-38-2 [Source:UniProtKB/Swiss-Prot;Acc:P0DP08]                                             | K1270726.1 | 41444     | 41876     | 351  |
| IGHV3-7    | 2.477608596 | 2.66896E-52 | 1.2128E-50  | UP     | immunoglobulin heavy variable 3-7 [Source:HGNC Symbol;Acc:HGNC:5620]                                                      | chr14      | 106062151 | 106062683 | 430  |
| TRAV8-2    | 1.636903992 | 3.28871E-52 | 1.49069E-50 | UP     | T-cell receptor alpha variable 8-2 [Source:HGNC Symbol;Acc:HGNC:12147]                                                    | chr14      | 21846537  | 21847221  | 566  |
| IFI35      | 0.768060137 | 3.34261E-52 | 1.51134E-50 | UP     | interferon induced protein 35 [Source:HGNC Symbol;Acc:HGNC:5399]                                                          | chr17      | 43006725  | 43014456  | 1247 |
| ARHGAP15   | 0.991900037 | 3.45709E-52 | 1.55922E-50 | UP     | Rho GTPase activating protein 15 [Source:HGNC Symbol;Acc:HGNC:21030]                                                      | chr2       | 143091362 | 143768352 | 4345 |
| PARP12     | 0.593232313 | 4.61834E-52 | 2.0778E-50  | UP     | poly(ADP-ribose) polymerase family member 12 [Source:HGNC Symbol;Acc:HGNC:21919]                                          | chr7       | 140023744 | 140063721 | 3796 |
| APBB1IP    | 1.044305589 | 5.07475E-52 | 2.27748E-50 | UP     | amyloid beta precursor protein binding family B member 1 interacting protein [Source:HGNC Symbol;Acc:HGNC:17379]          | chr10      | 26438203  | 26567803  | 3598 |
| TMC8       | 1.026061968 | 5.09375E-52 | 2.28037E-50 | UP     | transmembrane channel like 8 [Source:HGNC Symbol;Acc:HGNC:20474]                                                          | chr17      | 78130786  | 78142968  | 4411 |
| IGLV1-51   | 1.912754999 | 6.83489E-52 | 3.03734E-50 | UP     | immunoglobulin lambda variable 1-51 [Source:HGNC Symbol;Acc:HGNC:5882]                                                    | chr22      | 22322472  | 22322969  | 389  |
| IGLV1-40   | 2.558473833 | 8.39537E-52 | 3.72167E-50 | UP     | immunoglobulin lambda variable 1-40 [Source:HGNC Symbol;Acc:HGNC:5877]                                                    | chr22      | 22409766  | 22410282  | 407  |
| TLR6       | 0.96331234  | 1.08791E-51 | 4.81096E-50 | UP     | toll like receptor 6 [Source:HGNC Symbol;Acc:HGNC:16711]                                                                  | chr4       | 38823715  | 38856817  | 5882 |
| TNFRSF17   | 1.959295395 | 1.12874E-51 | 4.97935E-50 | UP     | TNF receptor superfamily member 17 [Source:HGNC Symbol;Acc:HGNC:11913]                                                    | chr16      | 11965107  | 11968068  | 994  |
| IGHV4-39   | 2.727798649 | 1.57298E-51 | 6.92227E-50 | UP     | immunoglobulin heavy variable 4-39 [Source:HGNC Symbol;Acc:HGNC:5651]                                                     | chr14      | 106421711 | 106422218 | 425  |
| CLEC4E     | 1.548108988 | 1.66965E-51 | 7.32988E-50 | UP     | C-type lectin domain family 4 member E [Source:HGNC Symbol;Acc:HGNC:14555]                                                | chr12      | 8533305   | 8540963   | 2234 |
| TNFRSF1B   | 0.786426177 | 1.74473E-51 | 7.641E-50   | UP     | TNF receptor superfamily member 1B [Source:HGNC Symbol;Acc:HGNC:11917]                                                    | chr1       | 12167003  | 12209228  | 3694 |
| HCPS5      | 1.210444806 | 2.30287E-51 | 1.0061E-49  | UP     | HLA complex P5 (non-protein coding) [Source:HGNC Symbol;Acc:HGNC:21659]                                                   | chr6       | 31400702  | 31465809  | 2658 |
| KLHL6      | 1.109326085 | 2.60485E-51 | 1.1353E-49  | UP     | kelch like family member 6 [Source:HGNC Symbol;Acc:HGNC:18653]                                                            | chr3       | 183487531 | 183555689 | 6298 |
| CCR1       | 0.992293816 | 2.65022E-51 | 1.1523E-49  | UP     | C-C motif chemokine receptor 1 [Source:HGNC Symbol;Acc:HGNC:1602]                                                         | chr3       | 46201709  | 46208396  | 2731 |
| IGKV1-16   | 2.803479748 | 2.75613E-51 | 1.19549E-49 | UP     | immunoglobulin kappa variable 1-16 [Source:HGNC Symbol;Acc:HGNC:5732]                                                     | chr2       | 89099859  | 89100361  | 378  |
| IGHV3-49   | 2.730413867 | 3.65587E-51 | 1.58197E-49 | UP     | immunoglobulin heavy variable 3-49 [Source:HGNC Symbol;Acc:HGNC:5607]                                                     | chr14      | 106556936 | 106557477 | 439  |
| KCNA3      | 1.367439328 | 4.54101E-51 | 1.96031E-49 | UP     | potassium voltage-gated channel subfamily A member 3 [Source:HGNC Symbol;Acc:HGNC:6221]                                   | chr1       | 110672465 | 110675033 | 2569 |
| SFMBT2     | 0.858215868 | 4.72801E-51 | 2.03619E-49 | UP     | Scm-like with four mbt domains 2 [Source:HGNC Symbol;Acc:HGNC:20256]                                                      | chr10      | 7158624   | 7411486   | 9953 |
| KLHDC7B    | 1.948134777 | 6.79436E-51 | 2.91916E-49 | UP     | kelch domain containing 7B [Source:HGNC Symbol;Acc:HGNC:25145]                                                            | chr22      | 50548033  | 50551023  | 2991 |
| CSorf56    | 0.707988239 | 8.12882E-51 | 3.48425E-49 | UP     | chromosome 5 open reading frame 56 [Source:HGNC Symbol;Acc:HGNC:33838]                                                    | chr5       | 132410636 | 132488702 | 8411 |
| IGHV3-53   | 2.716596617 | 8.17702E-51 | 3.49664E-49 | UP     | immunoglobulin heavy variable 3-53 [Source:HGNC Symbol;Acc:HGNC:5610]                                                     | chr14      | 106592676 | 106593347 | 571  |
| HLA-DOB    | 1.398704757 | 1.05126E-50 | 4.48481E-49 | UP     | major histocompatibility complex, class II, DO beta [Source:HGNC Symbol;Acc:HGNC:4937]                                    | chr6       | 32812763  | 32817048  | 1372 |
| IL32       | 1.120999253 | 1.1274E-50  | 4.79834E-49 | UP     | interleukin 32 [Source:HGNC Symbol;Acc:HGNC:16830]                                                                        | chr16      | 3065297   | 3069819   | 1684 |
| SIGLEC1    | 1.101229351 | 1.50468E-50 | 6.3891E-49  | UP     | sialic acid binding Ig like lectin 1 [Source:HGNC Symbol;Acc:HGNC:11127]                                                  | chr20      | 3686970   | 3707128   | 6720 |
| OASL       | 1.225499313 | 1.51292E-50 | 6.40907E-49 | UP     | 2'-5'-oligoadenylate synthetase like [Source:HGNC Symbol;Acc:HGNC:8090]                                                   | chr12      | 121019111 | 121039242 | 3266 |
| IFI16      | 0.882800319 | 2.74328E-50 | 1.1594E-48  | UP     | interferon gamma inducible protein 16 [Source:HGNC Symbol;Acc:HGNC:5395]                                                  | chr1       | 159009892 | 159051555 | 2933 |
| IGHV4-28   | 2.413233979 | 2.85885E-50 | 1.20544E-48 | UP     | immunoglobulin heavy variable 4-28 [Source:HGNC Symbol;Acc:HGNC:5645]                                                     | chr14      | 106324254 | 106324760 | 425  |
| CD244      | 1.277991458 | 4.00384E-50 | 1.68431E-48 | UP     | CD244 molecule [Source:HGNC Symbol;Acc:HGNC:18171]                                                                        | chr1       | 160830160 | 160862855 | 2478 |
| SERPINB9   | 0.902273374 | 4.72914E-50 | 1.98481E-48 | UP     | serpin family B member 9 [Source:HGNC Symbol;Acc:HGNC:8955]                                                               | chr6       | 2887266   | 2903280   | 4118 |
| AC245369.7 | 2.242467037 | 7.25311E-50 | 3.03709E-48 | UP     |                                                                                                                           | chr14      | 106728163 | 106728615 | 350  |
| IL27RA     | 0.944187847 | 8.88465E-50 | 3.71169E-48 | UP     | interleukin 27 receptor subunit alpha [Source:HGNC Symbol;Acc:HGNC:17290]                                                 | chr19      | 14031748  | 14053216  | 2962 |
| FAM30A     | 1.932983285 | 1.32665E-49 | 5.52954E-48 | UP     | family with sequence similarity 30 member A [Source:HGNC Symbol;Acc:HGNC:19955]                                           | chr14      | 105917979 | 105932642 | 9612 |
| IGLC3      | 2.33019851  | 2.56916E-49 | 1.06838E-47 | UP     | immunoglobulin lambda constant 3 (Kern-Oz+ marker) [Source:HGNC Symbol;Acc:HGNC:5857]                                     | chr22      | 22906342  | 22906803  | 462  |
| VAV1       | 0.917411411 | 4.64446E-49 | 1.92697E-47 | UP     | vav guanine nucleotide exchange factor 1 [Source:HGNC Symbol;Acc:HGNC:12657]                                              | chr19      | 6772714   | 6857366   | 3051 |
| KLRB1      | 1.374817598 | 4.70551E-49 | 1.94785E-47 | UP     | killer cell lectin like receptor B1 [Source:HGNC Symbol;Acc:HGNC:6373]                                                    | chr12      | 9594551   | 9607886   | 1448 |
| FGD2       | 0.894289725 | 5.11233E-49 | 2.11143E-47 | UP     | FYVE, RhoGEF and PH domain containing 2 [Source:HGNC Symbol;Acc:HGNC:3664]                                                | chr6       | 37005647  | 37029070  | 3046 |
| IFI44      | 1.09670895  | 5.62675E-49 | 2.3186E-47  | UP     | interferon induced protein 44 [Source:HGNC Symbol;Acc:HGNC:16938]                                                         | chr1       | 78649831  | 78664078  | 1687 |
| IGLV2-8    | 2.517171982 | 7.62886E-49 | 3.13648E-47 | UP     | immunoglobulin lambda variable 2-8 [Source:HGNC Symbol;Acc:HGNC:5895]                                                     | chr22      | 22822658  | 22823289  | 517  |
| KIR3DL2    | 1.820813425 | 8.26807E-49 | 3.39159E-47 | UP     | killer cell immunoglobulin like receptor, three Ig domains and long cytoplasmic tail 2 [Source:HGNC Symbol;Acc:HGNC:6339] | chr19      | 54850443  | 54867207  | 1877 |
| IGHV2-70   | 2.430149417 | 8.70607E-49 | 3.5632E-47  | UP     | immunoglobulin heavy variable 2-70 [Source:HGNC Symbol;Acc:HGNC:5577]                                                     | chr14      | 106770577 | 106771020 | 358  |
| CCR4       | 1.362380157 | 9.61239E-49 | 3.92527E-47 | UP     | C-C motif chemokine receptor 4 [Source:HGNC Symbol;Acc:HGNC:1605]                                                         | chr3       | 32951574  | 32956349  | 3095 |
| CD79A      | 1.886046604 | 1.1503E-48  | 4.68678E-47 | UP     | CD79a molecule [Source:HGNC Symbol;Acc:HGNC:1698]                                                                         | chr19      | 41877120  | 41881372  | 1258 |
| GAB3       | 0.852893849 | 1.25679E-48 | 5.10918E-47 | UP     | GRB2 associated binding protein 3 [Source:HGNC Symbol;Acc:HGNC:17515]                                                     | chrX       | 154675253 | 154751077 | 4741 |
| IGHV3-11   | 2.560225527 | 1.51065E-48 | 6.11376E-47 | UP     | immunoglobulin heavy variable 3-11 (gene/pseudogene) [Source:HGNC Symbol;Acc:HGNC:5580]                                   | chr14      | 106116635 | 106117204 | 473  |
| PRDM1      | 0.871971085 | 1.89392E-48 | 7.64781E-47 | UP     | PR/SET domain 1 [Source:HGNC Symbol;Acc:HGNC:9346]                                                                        | chr6       | 106086320 | 106109939 | 5320 |
| ARRDC5     | 1.377809901 | 2.13031E-48 | 8.58324E-47 | UP     | arrestin domain containing 5 [Source:HGNC Symbol;Acc:HGNC:31407]                                                          | chr19      | 4890437   | 4902867   | 1638 |
| IGLV4-69   | 2.418064427 | 2.19703E-48 | 8.83247E-47 | UP     | immunoglobulin lambda variable 4-69 [Source:HGNC Symbol;Acc:HGNC:5921]                                                    | chr22      | 22030934  | 22031472  | 419  |
| LPXN       | 0.713953364 | 2.49066E-48 | 9.99074E-47 | UP     | leupaxin [Source:HGNC Symbol;Acc:HGNC:14061]                                                                              | chr11      | 58526871  | 58578220  | 2068 |
| IGHV2-5    | 2.62689915  | 2.49948E-48 | 1.0004E-46  | UP     | immunoglobulin heavy variable 2-5 [Source:HGNC Symbol;Acc:HGNC:5576]                                                      | chr14      | 106037902 | 106038365 | 378  |
| TRIM14     | 0.585362685 | 2.7585E-48  | 1.10164E-46 | UP     | tripartite motif containing 14 [Source:HGNC Symbol;Acc:HGNC:16283]                                                        | chr9       | 98069275  | 98119210  | 4879 |
| AC245088.3 | 1.656094552 | 3.1512E-48  | 1.2557E-46  | UP     |                                                                                                                           | chr7       | 142349152 | 142349664 | 424  |
| NFAM1      | 1.037078866 | 3.61486E-48 | 1.4373E-46  | UP     | NFAT activating protein with ITAM motif 1 [Source:HGNC Symbol;Acc:HGNC:29872]                                             | chr22      | 42380410  | 42432395  | 5602 |

| PARAM    | logFC        | pval        | pval.adj    | UPDOWN | desc                                                                                          | chr   | start     | end       | size |
|----------|--------------|-------------|-------------|--------|-----------------------------------------------------------------------------------------------|-------|-----------|-----------|------|
| RSAD2    | 1.19728661   | 4.67675E-48 | 1.85545E-46 | UP     | radical S-adenosyl methionine domain containing 2 [Source:HGNC Symbol;Acc:HGNC:30908]         | chr2  | 6877665   | 6898239   | 3519 |
| IGLV5-45 | 2.481158087  | 5.40746E-48 | 2.14067E-46 | UP     | immunoglobulin lambda variable 5-45 [Source:HGNC Symbol;Acc:HGNC:5924]                        | chr22 | 22375986  | 22376505  | 397  |
| PARVG    | 0.919474065  | 7.95987E-48 | 3.1374E-46  | UP     | parvin gamma [Source:HGNC Symbol;Acc:HGNC:14654]                                              | chr22 | 44172956  | 44208469  | 4459 |
| ZNF80    | 1.47132705   | 8.01654E-48 | 3.15288E-46 | UP     | zinc finger protein 80 [Source:HGNC Symbol;Acc:HGNC:13155]                                    | chr3  | 114234631 | 114237578 | 2948 |
| IGLV3-21 | 2.591015132  | 9.29323E-48 | 3.64709E-46 | UP     | immunoglobulin lambda variable 3-21 [Source:HGNC Symbol;Acc:HGNC:5905]                        | chr22 | 22711689  | 22713203  | 602  |
| MNDA     | 1.012407399  | 9.64651E-48 | 3.77756E-46 | UP     | myeloid cell nuclear differentiation antigen [Source:HGNC Symbol;Acc:HGNC:7183]               | chr1  | 158831317 | 158849504 | 1752 |
| IGKV1-27 | 2.659558914  | 1.05117E-47 | 4.10751E-46 | UP     | immunoglobulin kappa variable 1-27 [Source:HGNC Symbol;Acc:HGNC:5735]                         | chr2  | 89213423  | 89213928  | 382  |
| IGKV1-9  | 2.670815051  | 1.05411E-47 | 4.11013E-46 | UP     | immunoglobulin kappa variable 1-9 [Source:HGNC Symbol;Acc:HGNC:5744]                          | chr2  | 89009982  | 89010515  | 409  |
| PIK3R5   | 0.894120928  | 1.05832E-47 | 4.1177E-46  | UP     | phosphoinositide-3-kinase regulatory subunit 5 [Source:HGNC Symbol;Acc:HGNC:30035]            | chr17 | 8878917   | 8965712   | 4549 |
| IGLV3-9  | 2.681550799  | 1.13021E-47 | 4.38795E-46 | UP     | immunoglobulin lambda variable 3-9 (gene/pseudogene) [Source:HGNC Symbol;Acc:HGNC:5918]       | chr22 | 22819010  | 22819756  | 461  |
| TRGC1    | 1.644984362  | 1.23355E-47 | 4.77895E-46 | UP     | T-cell receptor gamma constant 1 [Source:HGNC Symbol;Acc:HGNC:12275]                          | chr7  | 38257879  | 38265678  | 2730 |
| IGKV1-12 | 2.448774605  | 1.25944E-47 | 4.86886E-46 | UP     | immunoglobulin kappa variable 1-12 [Source:HGNC Symbol;Acc:HGNC:5730]                         | chr2  | 89040224  | 89040745  | 398  |
| IGHV2-26 | 2.571664603  | 1.41489E-47 | 5.44659E-46 | UP     | immunoglobulin heavy variable 2-26 [Source:HGNC Symbol;Acc:HGNC:5575]                         | chr14 | 106301396 | 106301862 | 381  |
| FBXO6    | 0.651452591  | 2.16653E-47 | 8.32233E-46 | UP     | F-box protein 6 [Source:HGNC Symbol;Acc:HGNC:13585]                                           | chr1  | 11664124  | 11674354  | 1520 |
| GIMAP2   | 0.84551116   | 2.58211E-47 | 9.89773E-46 | UP     | GTPase, IMAP family member 2 [Source:HGNC Symbol;Acc:HGNC:21789]                              | chr7  | 150685700 | 150693641 | 1663 |
| CD69     | 1.336611058  | 2.63146E-47 | 1.00656E-45 | UP     | CD69 molecule [Source:HGNC Symbol;Acc:HGNC:1694]                                              | chr12 | 9752486   | 9760901   | 2124 |
| IGKV1-39 | 2.442845945  | 2.71518E-47 | 1.0364E-45  | UP     | immunoglobulin kappa variable 1-39 (gene/pseudogene) [Source:HGNC Symbol;Acc:HGNC:5740]       | chr2  | 89319625  | 89320146  | 398  |
| GBP2     | 0.738836434  | 2.83446E-47 | 1.07966E-45 | UP     | guanylate binding protein 2 [Source:HGNC Symbol;Acc:HGNC:4183]                                | chr1  | 89108000  | 89126114  | 2220 |
| MICB     | 0.946159385  | 3.09969E-47 | 1.17821E-45 | UP     | MHC class I polypeptide-related sequence B [Source:HGNC Symbol;Acc:HGNC:7091]                 | chr6  | 31494881  | 31511124  | 2590 |
| GIMAP8   | 0.790936995  | 3.27011E-47 | 1.24038E-45 | UP     | GTPase, IMAP family member 8 [Source:HGNC Symbol;Acc:HGNC:21792]                              | chr7  | 150450630 | 150479392 | 4184 |
| IGHV1-2  | 2.671954204  | 3.94269E-47 | 1.49238E-45 | UP     | immunoglobulin heavy variable 1-2 [Source:HGNC Symbol;Acc:HGNC:5550]                          | chr14 | 105985682 | 105987083 | 417  |
| ODF3B    | 1.022438782  | 5.35706E-47 | 2.02352E-45 | UP     | outer dense fiber of sperm tails 3B [Source:HGNC Symbol;Acc:HGNC:34388]                       | chr22 | 50530409  | 50532579  | 1089 |
| TRBV6-1  | 1.521612798  | 6.70396E-47 | 2.52702E-45 | UP     | T-cell receptor beta variable 6-1 [Source:HGNC Symbol;Acc:HGNC:12226]                         | chr7  | 142328297 | 142328786 | 401  |
| ZBTB32   | 1.355992817  | 8.40664E-47 | 3.16226E-45 | UP     | zinc finger and BTB domain containing 32 [Source:HGNC Symbol;Acc:HGNC:16763]                  | chr19 | 35704527  | 35717038  | 2068 |
| GNB4     | 0.786645343  | 1.00194E-46 | 3.76113E-45 | UP     | G protein subunit beta 4 [Source:HGNC Symbol;Acc:HGNC:20731]                                  | chr3  | 179396089 | 179451590 | 6603 |
| RUFY4    | 1.495092163  | 1.40096E-46 | 5.24147E-45 | UP     | RUN and FYVE domain containing 4 [Source:HGNC Symbol;Acc:HGNC:24804]                          | chr2  | 218069255 | 218090580 | 2981 |
| PTPRJ    | 0.697312798  | 1.42183E-46 | 5.30436E-45 | UP     | protein tyrosine phosphatase, receptor type J [Source:HGNC Symbol;Acc:HGNC:9673]              | chr11 | 47980558  | 48170841  | 9084 |
| MARCH1   | 0.869223469  | 1.55941E-46 | 5.80568E-45 | UP     | membrane associated ring-CH-type finger 1 [Source:HGNC Symbol;Acc:HGNC:26077]                 | chr4  | 163524298 | 164384050 | 7424 |
| FPR3     | 1.017840383  | 1.76933E-46 | 6.5737E-45  | UP     | formyl peptide receptor 3 [Source:HGNC Symbol;Acc:HGNC:3828]                                  | chr19 | 51795163  | 51826189  | 2772 |
| LST1     | 0.989629918  | 1.8374E-46  | 6.81267E-45 | UP     | lycocyte specific transcript 1 [Source:HGNC Symbol;Acc:HGNC:14189]                            | chr6  | 31586124  | 31588909  | 1219 |
| IGKV2-30 | 2.336012435  | 2.64967E-46 | 9.80432E-45 | UP     | immunoglobulin kappa variable 2-30 [Source:HGNC Symbol;Acc:HGNC:5785]                         | chr2  | 89244781  | 89245596  | 390  |
| IGHV1-24 | 2.756426293  | 3.34333E-46 | 1.23458E-44 | UP     | immunoglobulin heavy variable 1-24 [Source:HGNC Symbol;Acc:HGNC:5551]                         | chr14 | 106276548 | 106277043 | 411  |
| ICAM1    | 1.094606441  | 3.45925E-46 | 1.27479E-44 | UP     | intercellular adhesion molecule 1 [Source:HGNC Symbol;Acc:HGNC:5344]                          | chr19 | 10270835  | 10286615  | 3252 |
| IGHV4-61 | 2.391434391  | 3.63643E-46 | 1.33737E-44 | UP     | immunoglobulin heavy variable 4-61 [Source:HGNC Symbol;Acc:HGNC:5655]                         | chr14 | 106639119 | 106639657 | 457  |
| CCDC141  | 1.252836509  | 3.69104E-46 | 1.3547E-44  | UP     | coiled-coil domain containing 141 [Source:HGNC Symbol;Acc:HGNC:26821]                         | chr2  | 178873021 | 179050059 | 6960 |
| PLA2G7   | 1.063876065  | 4.01422E-46 | 1.47034E-44 | UP     | phospholipase A2 group VII [Source:HGNC Symbol;Acc:HGNC:9040]                                 | chr6  | 46704201  | 46735693  | 2026 |
| PDE4B    | 1.001164945  | 4.44503E-46 | 1.62485E-44 | UP     | phosphodiesterase 4B [Source:HGNC Symbol;Acc:HGNC:8781]                                       | chr1  | 65792514  | 66374579  | 6037 |
| TSHR     | 1.681032436  | 4.82964E-46 | 1.76189E-44 | UP     | thyroid stimulating hormone receptor [Source:HGNC Symbol;Acc:HGNC:12373]                      | chr14 | 80955043  | 81146302  | 5158 |
| IGKV1-17 | 2.574832368  | 8.92265E-46 | 3.24853E-44 | UP     | immunoglobulin kappa variable 1-17 [Source:HGNC Symbol;Acc:HGNC:5733]                         | chr2  | 89117342  | 89117844  | 378  |
| IGHV3-20 | 2.75258103   | 9.06168E-46 | 3.29253E-44 | UP     | immunoglobulin heavy variable 3-20 [Source:HGNC Symbol;Acc:HGNC:5585]                         | chr14 | 106210936 | 106211453 | 415  |
| IFITM1   | 1.021471182  | 9.86888E-46 | 3.57865E-44 | UP     | interferon induced transmembrane protein 1 [Source:HGNC Symbol;Acc:HGNC:5412]                 | chr11 | 313506    | 315272    | 1041 |
| ZC3H12D  | 1.16316383   | 1.15047E-45 | 4.16351E-44 | UP     | zinc finger CCCH-type containing 12D [Source:HGNC Symbol;Acc:HGNC:21175]                      | chr6  | 149446795 | 149485061 | 6029 |
| TESPA1   | 1.165857107  | 1.23444E-45 | 4.45849E-44 | UP     | thymocyte expressed, positive selection associated 1 [Source:HGNC Symbol;Acc:HGNC:29109]      | chr12 | 54948018  | 54984672  | 4670 |
| C1orf162 | 0.93419798   | 1.28892E-45 | 4.64601E-44 | UP     | chromosome 1 open reading frame 162 [Source:HGNC Symbol;Acc:HGNC:28344]                       | chr1  | 111473792 | 111478512 | 1107 |
| RTP4     | 1.028006542  | 1.34245E-45 | 4.82938E-44 | UP     | receptor transporter protein 4 [Source:HGNC Symbol;Acc:HGNC:23992]                            | chr3  | 187368332 | 187372076 | 1554 |
| RCS1     | 0.845894811  | 1.36176E-45 | 4.88913E-44 | UP     | RCS1 domain containing 1 [Source:HGNC Symbol;Acc:HGNC:28310]                                  | chr1  | 167630093 | 167706249 | 3135 |
| CMPK2    | 0.961246553  | 1.53952E-45 | 5.5164E-44  | UP     | cytidine/uridine monophosphate kinase 2 [Source:HGNC Symbol;Acc:HGNC:27015]                   | chr2  | 6840570   | 6865819   | 3916 |
| APOBEC3H | 1.162490078  | 1.63353E-45 | 5.84173E-44 | UP     | apolipoprotein B mRNA editing enzyme catalytic subunit 3H [Source:HGNC Symbol;Acc:HGNC:24100] | chr22 | 39097224  | 39104067  | 1143 |
| LGALS9   | 0.823720018  | 1.7664E-45  | 6.30446E-44 | UP     | galectin 9 [Source:HGNC Symbol;Acc:HGNC:6570]                                                 | chr17 | 27629798  | 27649560  | 3114 |
| ARHGAP45 | 0.883412619  | 1.94023E-45 | 6.91128E-44 | UP     | Rho GTPase activating protein 45 [Source:HGNC Symbol;Acc:HGNC:17102]                          | chr19 | 1065923   | 1086628   | 5280 |
| RG51     | 1.388288604  | 2.32906E-45 | 8.28005E-44 | UP     | regulator of G protein signaling 1 [Source:HGNC Symbol;Acc:HGNC:9991]                         | chr1  | 192575727 | 192580031 | 1975 |
| DHRS2    | -2.509764565 | 2.4207E-45  | 8.58898E-44 | DOWN   | dehydrogenase/reductase 2 [Source:HGNC Symbol;Acc:HGNC:18349]                                 | chr14 | 23636335  | 23645639  | 1727 |
| ADGRG5   | 1.337047948  | 2.43116E-45 | 8.60925E-44 | UP     | adhesion G protein-coupled receptor G5 [Source:HGNC Symbol;Acc:HGNC:19010]                    | chr16 | 57542421  | 57577195  | 4198 |
| IGHV4-31 | 2.55601304   | 2.49552E-45 | 8.81993E-44 | UP     | immunoglobulin heavy variable 4-31 [Source:HGNC Symbol;Acc:HGNC:5649]                         | chr14 | 106349283 | 106349792 | 428  |
| POU2AF1  | 1.788745346  | 2.72655E-45 | 9.61773E-44 | UP     | POU class 2 associating factor 1 [Source:HGNC Symbol;Acc:HGNC:9211]                           | chr11 | 111352252 | 111379692 | 3295 |
| CCL3     | 1.30806015   | 3.36379E-45 | 1.18196E-43 | UP     | C-C motif chemokine ligand 3 [Source:HGNC Symbol;Acc:HGNC:10627]                              | chr17 | 36088256  | 36090141  | 778  |
| IGLV6-57 | 2.42855671   | 3.93402E-45 | 1.37965E-43 | UP     | immunoglobulin lambda variable 6-57 [Source:HGNC Symbol;Acc:HGNC:5927]                        | chr22 | 22195799  | 22196276  | 353  |



| PARAM      | logFC        | pval        | pval.adj    | UPDOWN | desc                                                                                                         | chr        | start     | end       | size  |
|------------|--------------|-------------|-------------|--------|--------------------------------------------------------------------------------------------------------------|------------|-----------|-----------|-------|
| IGKV2-24   | 2.318725187  | 4.00794E-45 | 1.40286E-43 | UP     | immunoglobulin kappa variable 2-24 [Source:HGNC Symbol;Acc:HGNC:5781]                                        | chr2       | 89176328  | 89177160  | 390   |
| WDFY4      | 0.984517611  | 5.06499E-45 | 1.76943E-43 | UP     | WDFY family member 4 [Source:HGNC Symbol;Acc:HGNC:29323]                                                     | chr10      | 48684876  | 48982956  | 10251 |
| TRAV1-2    | 1.560802631  | 5.73491E-45 | 1.99961E-43 | UP     | T-cell receptor alpha variable 1-2 [Source:HGNC Symbol;Acc:HGNC:12102]                                       | chr14      | 21642889  | 21643578  | 402   |
| TRAV23DV6  | 1.420678609  | 6.65088E-45 | 2.31453E-43 | UP     | T-cell receptor alpha variable 23/delta variable 6 [Source:HGNC Symbol;Acc:HGNC:12120]                       | chr14      | 22086407  | 22086961  | 409   |
| CD70       | 1.695579225  | 9.24921E-45 | 3.21259E-43 | UP     | CD70 molecule [Source:HGNC Symbol;Acc:HGNC:11937]                                                            | chr19      | 6583183   | 6591152   | 1209  |
| NRR0S      | 0.780991972  | 1.1648E-44  | 4.02381E-43 | UP     | negative regulator of reactive oxygen species [Source:HGNC Symbol;Acc:HGNC:24613]                            | chr3       | 196639686 | 196662004 | 2564  |
| CD300A     | 0.827677928  | 1.16513E-44 | 4.02381E-43 | UP     | CD300A molecule [Source:HGNC Symbol;Acc:HGNC:19319]                                                          | chr17      | 74466416  | 74484796  | 2287  |
| CD180      | 1.056634723  | 1.27922E-44 | 4.40943E-43 | UP     | CD180 molecule [Source:HGNC Symbol;Acc:HGNC:6726]                                                            | chr5       | 67179613  | 67196799  | 5388  |
| CMKLR1     | 1.003241773  | 1.56898E-44 | 5.39794E-43 | UP     | chemerin chemokine-like receptor 1 [Source:HGNC Symbol;Acc:HGNC:2121]                                        | chr12      | 108288044 | 108339341 | 5638  |
| GIMAP1     | 0.948142391  | 1.81374E-44 | 6.22267E-43 | UP     | GTPase, IMAP family member 1 [Source:HGNC Symbol;Acc:HGNC:23237]                                             | chr7       | 150716557 | 150724284 | 4420  |
| CD163      | 1.021091269  | 1.81556E-44 | 6.22267E-43 | UP     | CD163 molecule [Source:HGNC Symbol;Acc:HGNC:1631]                                                            | chr12      | 7470813   | 7503893   | 4388  |
| TRPV2      | 0.738371251  | 1.84079E-44 | 6.29724E-43 | UP     | transient receptor potential cation channel subfamily V member 2 [Source:HGNC Symbol;Acc:HGNC:18082]         | chr17      | 16415542  | 16437003  | 2808  |
| IGHV3-43   | 2.470775275  | 2.05392E-44 | 7.01311E-43 | UP     | immunoglobulin heavy variable 3-43 [Source:HGNC Symbol;Acc:HGNC:5604]                                        | chr14      | 106470264 | 106470800 | 434   |
| AKNA       | 0.680245147  | 2.22202E-44 | 7.57281E-43 | UP     | AT-hook transcription factor [Source:HGNC Symbol;Acc:HGNC:24108]                                             | chr9       | 114334156 | 114394405 | 8372  |
| CSF2RA     | 0.893989289  | 2.35599E-44 | 8.01436E-43 | UP     | colony stimulating factor 2 receptor alpha subunit [Source:HGNC Symbol;Acc:HGNC:2435]                        | chrX       | 1268800   | 1310381   | 2892  |
| P2RY13     | 1.092285598  | 3.27057E-44 | 1.11046E-42 | UP     | purinergic receptor P2Y13 [Source:HGNC Symbol;Acc:HGNC:4537]                                                 | chr3       | 151326312 | 151329548 | 2764  |
| AC245369.3 | 2.475245826  | 3.81836E-44 | 1.29403E-42 | UP     | Immunoglobulin heavy variable 1-69D [Source:UniProtKB/Swiss-Prot;Acc:AA04B4J2H0]                             | chr14      | 106762092 | 106762588 | 411   |
| CD28       | 1.052288959  | 4.25888E-44 | 1.44063E-42 | UP     | CD28 molecule [Source:HGNC Symbol;Acc:HGNC:1653]                                                             | chr2       | 203706475 | 203738912 | 4885  |
| PREX1      | 0.665023879  | 4.61958E-44 | 1.55741E-42 | UP     | phosphatidylinositol-3,4,5-trisphosphate dependent Rac exchange factor 1 [Source:HGNC Symbol;Acc:HGNC:32594] | chr20      | 48624252  | 48827883  | 6636  |
| ZFX3       | -0.603731942 | 4.62129E-44 | 1.55741E-42 | DOWN   | zinc finger homeobox 3 [Source:HGNC Symbol;Acc:HGNC:777]                                                     | chr16      | 72782885  | 73131094  | 17724 |
| SUSD3      | 1.141455617  | 7.29626E-44 | 2.45433E-42 | UP     | sushi domain containing 3 [Source:HGNC Symbol;Acc:HGNC:28391]                                                | chr9       | 93058688  | 93085138  | 1263  |
| AC233755.2 | 2.410017212  | 7.31306E-44 | 2.45543E-42 | UP     |                                                                                                              | KI270726.1 | 26241     | 26534     | 294   |
| LTB        | 1.300117841  | 7.76645E-44 | 2.60284E-42 | UP     | lymphotoxin beta [Source:HGNC Symbol;Acc:HGNC:6711]                                                          | chr6       | 31580555  | 31582427  | 899   |
| MX1        | 1.063884001  | 9.1398E-44  | 3.05745E-42 | UP     | MX dynamin like GTPase 1 [Source:HGNC Symbol;Acc:HGNC:7532]                                                  | chr21      | 41420515  | 41459214  | 4039  |
| CAMK4      | 0.999792445  | 9.17979E-44 | 3.06517E-42 | UP     | calcium/calmodulin dependent protein kinase IV [Source:HGNC Symbol;Acc:HGNC:1464]                            | chr5       | 111223950 | 111494886 | 12262 |
| PARP15     | 1.096601298  | 1.41291E-43 | 4.70909E-42 | UP     | poly(ADP-ribose) polymerase family member 15 [Source:HGNC Symbol;Acc:HGNC:26876]                             | chr3       | 122577602 | 122639047 | 5214  |
| ADGRE1     | 1.209829744  | 1.42994E-43 | 4.7571E-42  | UP     | adhesion G protein-coupled receptor E1 [Source:HGNC Symbol;Acc:HGNC:3336]                                    | chr19      | 6887569   | 6940599   | 3233  |
| EMILIN2    | 0.763591526  | 1.48207E-43 | 4.9215E-42  | UP     | elastin microfibril interfacer 2 [Source:HGNC Symbol;Acc:HGNC:19881]                                         | chr18      | 2847030   | 2915993   | 5910  |
| ICAM3      | 0.752062988  | 1.86447E-43 | 6.18001E-42 | UP     | intercellular adhesion molecule 3 [Source:HGNC Symbol;Acc:HGNC:5346]                                         | chr19      | 10333776  | 10339823  | 2231  |
| NCF1C      | 1.395379861  | 1.96036E-43 | 6.48601E-42 | UP     | neutrophil cytosolic factor 1C pseudogene [Source:HGNC Symbol;Acc:HGNC:32523]                                | chr7       | 75156639  | 75172044  | 1427  |
| CLEC2B     | 1.008165577  | 2.8903E-43  | 9.54536E-42 | UP     | C-type lectin domain family 2 member B [Source:HGNC Symbol;Acc:HGNC:2053]                                    | chr12      | 9852984   | 9870136   | 2065  |
| PLXNC1     | 0.863692618  | 2.9123E-43  | 9.60052E-42 | UP     | plexin C1 [Source:HGNC Symbol;Acc:HGNC:9106]                                                                 | chr12      | 94148723  | 94307675  | 7848  |
| SLC2A5     | 1.181397457  | 2.95249E-43 | 9.71537E-42 | UP     | solute carrier family 2 member 5 [Source:HGNC Symbol;Acc:HGNC:11010]                                         | chr1       | 9035107   | 9069716   | 5760  |
| CD300LF    | 1.077234948  | 3.08846E-43 | 1.01444E-41 | UP     | CD300 molecule like family member f [Source:HGNC Symbol;Acc:HGNC:29883]                                      | chr17      | 74694311  | 74712978  | 2035  |
| IL7R       | 1.201283206  | 3.60845E-43 | 1.18309E-41 | UP     | major histocompatibility complex, class II, DR beta 5 [Source:HGNC Symbol;Acc:HGNC:6024]                     | chr5       | 35856849  | 35879603  | 4908  |
| CD200R1    | 1.044387527  | 3.80383E-43 | 1.24489E-41 | UP     | CD200 receptor 1 [Source:HGNC Symbol;Acc:HGNC:24235]                                                         | chr3       | 112921209 | 112975122 | 3905  |
| IGHV3-74   | 2.083751307  | 4.26134E-43 | 1.39211E-41 | UP     | immunoglobulin heavy variable 3-74 [Source:HGNC Symbol;Acc:HGNC:5624]                                        | chr14      | 106810442 | 106811131 | 587   |
| FCGR1B     | 1.425940675  | 4.68579E-43 | 1.52802E-41 | UP     | Fc fragment of IgG receptor 1b [Source:HGNC Symbol;Acc:HGNC:3614]                                            | chr1       | 121087345 | 121096310 | 2023  |
| FCRL6      | 1.371169962  | 6.34812E-43 | 2.06269E-41 | UP     | Fc receptor like 6 [Source:HGNC Symbol;Acc:HGNC:31910]                                                       | chr1       | 159800512 | 159816251 | 2005  |
| IGKV1-6    | 2.510418621  | 6.45932E-43 | 2.09506E-41 | UP     | immunoglobulin kappa variable 1-6 [Source:HGNC Symbol;Acc:HGNC:5742]                                         | chr2       | 88966262  | 88966767  | 380   |
| MEI1       | 1.282509903  | 6.71874E-43 | 2.17531E-41 | UP     | meiotic double-stranded break formation protein 1 [Source:HGNC Symbol;Acc:HGNC:28613]                        | chr22      | 41699499  | 41799454  | 4053  |
| CSF1R      | 0.823788413  | 6.96589E-43 | 2.25131E-41 | UP     | colony stimulating factor 1 receptor [Source:HGNC Symbol;Acc:HGNC:2433]                                      | chr5       | 150053291 | 150113372 | 3989  |
| IGKV1D-16  | 2.199747267  | 8.87077E-43 | 2.86185E-41 | UP     | immunoglobulin kappa variable 1D-16 [Source:HGNC Symbol;Acc:HGNC:5748]                                       | chr2       | 90100236  | 90100338  | 378   |
| PTAFR      | 0.804940915  | 1.04779E-42 | 3.37433E-41 | UP     | platelet activating factor receptor [Source:HGNC Symbol;Acc:HGNC:9582]                                       | chr1       | 28147166  | 28193936  | 4706  |
| SEPT6      | 0.674357771  | 1.65754E-42 | 5.32851E-41 | UP     | septin 6 [Source:HGNC Symbol;Acc:HGNC:15848]                                                                 | chrX       | 119615724 | 119693370 | 5716  |
| HLA-DRB5   | 1.295992378  | 1.90567E-42 | 6.11533E-41 | UP     | major histocompatibility complex, class II, DR beta 5 [Source:HGNC Symbol;Acc:HGNC:4953]                     | chr6       | 32517343  | 32530287  | 1260  |
| CTSC       | 0.768265649  | 1.92734E-42 | 6.17397E-41 | UP     | cathepsin C [Source:HGNC Symbol;Acc:HGNC:2528]                                                               | chr11      | 88293592  | 88337787  | 7639  |
| IGKV1D-12  | 2.181789799  | 2.07269E-42 | 6.62786E-41 | UP     | immunoglobulin kappa variable 1D-12 [Source:HGNC Symbol;Acc:HGNC:5746]                                       | chr2       | 90199840  | 90160335  | 371   |
| CLEC2D     | 0.634050171  | 2.97634E-42 | 9.50072E-41 | UP     | C-type lectin domain family 2 member D [Source:HGNC Symbol;Acc:HGNC:14351]                                   | chr12      | 96995613  | 96995555  | 5361  |
| PRKQ       | 1.124773939  | 3.71103E-42 | 1.18251E-40 | UP     | protein kinase C theta [Source:HGNC Symbol;Acc:HGNC:9410]                                                    | chr10      | 6427143   | 6580301   | 3295  |
| IGHG2      | 2.089648297  | 3.74404E-42 | 1.19093E-40 | UP     | immunoglobulin heavy constant gamma 2 (G2m marker) [Source:HGNC Symbol;Acc:HGNC:5526]                        | chr14      | 105639559 | 105644790 | 2594  |
| C2         | 0.929470547  | 7.88261E-42 | 2.50297E-40 | UP     | complement C2 [Source:HGNC Symbol;Acc:HGNC:1248]                                                             | chr6       | 31897785  | 31945672  | 3908  |
| AKAP5      | 0.833936602  | 8.87621E-42 | 2.81354E-40 | UP     | A-kinase anchoring protein 5 [Source:HGNC Symbol;Acc:HGNC:375]                                               | chr14      | 64465499  | 64474503  | 7512  |
| GNGT2      | 1.078595972  | 9.47765E-42 | 2.99894E-40 | UP     | G protein subunit gamma transducin 2 [Source:HGNC Symbol;Acc:HGNC:4412]                                      | chr17      | 49202791  | 49210574  | 1689  |
| IGKV3D-15  | 2.113411181  | 1.22478E-41 | 3.86872E-40 | UP     | immunoglobulin kappa variable 3D-15 (gene/pseudogene) [Source:HGNC Symbol;Acc:HGNC:5824]                     | chr2       | 90114838  | 90115402  | 396   |
| IGHV1-69   | 2.214578831  | 1.42376E-41 | 4.48943E-40 | UP     | immunoglobulin heavy variable 1-69 [Source:HGNC Symbol;Acc:HGNC:5558]                                        | chr14      | 106714684 | 106715181 | 412   |
| IGKV1D-8   | 2.136625347  | 1.52559E-41 | 4.80218E-40 | UP     | immunoglobulin kappa variable 1D-8 [Source:HGNC Symbol;Acc:HGNC:5759]                                        | chr2       | 90220727  | 90221384  | 534   |

| PARAM      | logFC        | pval        | pval.adj    | UPDOWN | desc                                                                                                           | chr        | start     | end       | size |
|------------|--------------|-------------|-------------|--------|----------------------------------------------------------------------------------------------------------------|------------|-----------|-----------|------|
| LAMP3      | 1.174592807  | 1.91455E-41 | 6.01605E-40 | UP     | lysosomal associated membrane protein 3 [Source:HGNC Symbol;Acc:HGNC:14582]                                    | chr3       | 183122213 | 183162911 | 3470 |
| TRPM2      | 0.683500525  | 1.97696E-41 | 6.20042E-40 | UP     | transient receptor potential cation channel subfamily M member 2 [Source:HGNC Symbol;Acc:HGNC:12339]           | chr21      | 443501663 | 44443081  | 6484 |
| GIMAP6     | 0.860470497  | 1.98006E-41 | 6.20042E-40 | UP     | GTPase, IMAP family member 6 [Source:HGNC Symbol;Acc:HGNC:21918]                                               | chr7       | 150625375 | 150632648 | 3913 |
| IGKV1D-33  | 2.197068653  | 2.10714E-41 | 6.58699E-40 | UP     | immunoglobulin kappa variable 1D-33 [Source:HGNC Symbol;Acc:HGNC:5753]                                         | chr2       | 89914261  | 89916052  | 324  |
| LYN        | 0.660132588  | 2.13715E-41 | 6.6693E-40  | UP     | LYN proto-oncogene, Src family tyrosine kinase [Source:HGNC Symbol;Acc:HGNC:6735]                              | chr8       | 55879813  | 56014168  | 5893 |
| PSME2P2    | 0.777410368  | 2.31301E-41 | 7.2057E-40  | UP     | proteasome activator subunit 2 pseudogene 2 [Source:HGNC Symbol;Acc:HGNC:30160]                                | chr13      | 48771128  | 48771827  | 700  |
| TMEM156    | 1.326810638  | 2.33525E-41 | 7.26251E-40 | UP     | transmembrane protein 156 [Source:HGNC Symbol;Acc:HGNC:26260]                                                  | chr4       | 38966744  | 39032421  | 1935 |
| RGL4       | 1.283606191  | 2.75768E-41 | 8.56157E-40 | UP     | ral guanine nucleotide dissociation stimulator like 4 [Source:HGNC Symbol;Acc:HGNC:31911]                      | chr22      | 23688142  | 23699176  | 3913 |
| CASP5      | 1.367927883  | 2.83801E-41 | 8.79589E-40 | UP     | caspase 5 [Source:HGNC Symbol;Acc:HGNC:1506]                                                                   | chr11      | 104994240 | 105023168 | 1488 |
| IGKV3D-11  | 2.108236565  | 4.63936E-41 | 1.43543E-39 | UP     | immunoglobulin kappa variable 3D-11 [Source:HGNC Symbol;Acc:HGNC:5823]                                         | chr2       | 90172802  | 90173414  | 444  |
| ANKRD44    | 0.707332332  | 4.65924E-41 | 1.43913E-39 | UP     | ankyrin repeat domain 44 [Source:HGNC Symbol;Acc:HGNC:25259]                                                   | chr2       | 196987488 | 197310787 | 7380 |
| ANTXR1P1   | 1.427297247  | 5.00648E-41 | 1.54375E-39 | UP     | anthrax toxin receptor-like pseudogene 1 [Source:HGNC Symbol;Acc:HGNC:45004]                                   | chr10      | 46233885  | 46273557  | 1829 |
| ARHGAP30   | 0.768869248  | 5.11273E-41 | 1.57384E-39 | UP     | Rho GTPase activating protein 30 [Source:HGNC Symbol;Acc:HGNC:27414]                                           | chr1       | 161046948 | 161069970 | 4419 |
| P2RY8      | 1.085369573  | 5.64198E-41 | 1.73381E-39 | UP     | purinergic receptor P2Y8 [Source:HGNC Symbol;Acc:HGNC:15524]                                                   | chrX       | 1462572   | 1537107   | 4198 |
| TLR7       | 0.982289031  | 6.69189E-41 | 2.05297E-39 | UP     | toll like receptor 7 [Source:HGNC Symbol;Acc:HGNC:15631]                                                       | chrX       | 12867083  | 12890380  | 5011 |
| AC141272.1 | 1.891954853  | 8.05035E-41 | 2.46555E-39 | UP     |                                                                                                                | KI270728.1 | 1270984   | 1271271   | 288  |
| FAM174B    | -1.147923641 | 1.01739E-40 | 3.11066E-39 | DOWN   | family with sequence similarity 174 member B [Source:HGNC Symbol;Acc:HGNC:34339]                               | chr15      | 92617443  | 92655958  | 3224 |
| JAML       | 0.959963329  | 1.11279E-40 | 3.39662E-39 | UP     | junction adhesion molecule like [Source:HGNC Symbol;Acc:HGNC:19084]                                            | chr11      | 118193740 | 118225094 | 2409 |
| HERC6      | 0.799273234  | 1.49903E-40 | 4.5679E-39  | UP     | HECT and RLD domain containing E3 ubiquitin protein ligase family member 6 [Source:HGNC Symbol;Acc:HGNC:26072] | chr4       | 88378739  | 88443111  | 3903 |
| FAS        | 0.7369595    | 1.57722E-40 | 4.79808E-39 | UP     | Fas cell surface death receptor [Source:HGNC Symbol;Acc:HGNC:11920]                                            | chr10      | 88990657  | 89015785  | 2582 |
| P2RY6      | 1.090284326  | 1.67533E-40 | 5.088E-39   | UP     | pyrimidineric receptor P2Y6 [Source:HGNC Symbol;Acc:HGNC:8543]                                                 | chr11      | 73264505  | 73298617  | 3940 |
| IGHV3-13   | 2.414161893  | 1.68671E-40 | 5.11402E-39 | UP     | immunoglobulin heavy variable 3-13 [Source:HGNC Symbol;Acc:HGNC:5581]                                          | chr14      | 106129540 | 106130072 | 430  |
| DOCK8      | 0.701539855  | 1.72467E-40 | 5.22037E-39 | UP     | dedicator of cytokinesis 8 [Source:HGNC Symbol;Acc:HGNC:19191]                                                 | chr9       | 214865    | 465259    | 8020 |
| IGLC6      | 2.013180391  | 1.86368E-40 | 5.63172E-39 | UP     | immunoglobulin lambda constant 6 [gene/pseudogene] [Source:HGNC Symbol;Acc:HGNC:5860]                          | chr22      | 22919535  | 22919851  | 317  |
| IGKV5-2    | 2.282743476  | 2.23744E-40 | 6.74992E-39 | UP     | immunoglobulin kappa variable 5-2 [Source:HGNC Symbol;Acc:HGNC:5835]                                           | chr2       | 88897232  | 88897784  | 408  |
| NUGC       | 1.527659273  | 2.68247E-40 | 8.07906E-39 | UP     | nuclear GTPase, germinal center associated [Source:HGNC Symbol;Acc:HGNC:33550]                                 | chr8       | 28021964  | 28083871  | 3887 |
| TMEM140    | 0.771127188  | 3.41316E-40 | 1.02457E-38 | UP     | transmembrane protein 140 [Source:HGNC Symbol;Acc:HGNC:21870]                                                  | chr7       | 135148072 | 135166215 | 1997 |
| V5IG2      | -1.918338053 | 3.77677E-40 | 1.13185E-38 | DOWN   | V-set and immunoglobulin domain containing 2 [Source:HGNC Symbol;Acc:HGNC:17149]                               | chr11      | 124747472 | 124752238 | 1432 |
| CHST11     | 0.797760354  | 4.10183E-40 | 1.22723E-38 | UP     | carbohydrate sulfotransferase 11 [Source:HGNC Symbol;Acc:HGNC:17422]                                           | chr12      | 104456968 | 104762014 | 6002 |
| ACPS       | 0.830244097  | 4.19533E-40 | 1.25314E-38 | UP     | acid phosphatase 5, tartrate resistant [Source:HGNC Symbol;Acc:HGNC:124]                                       | chr19      | 11574660  | 11578986  | 1800 |
| LILRB3     | 1.005301765  | 5.31318E-40 | 1.58443E-38 | UP     | leukocyte immunoglobulin like receptor B3 [Source:HGNC Symbol;Acc:HGNC:6607]                                   | chr19      | 54216278  | 54223506  | 2950 |
| HLA-DQA1   | 1.496214922  | 5.55483E-40 | 1.65377E-38 | UP     | major histocompatibility complex, class II, DQ alpha 1 [Source:HGNC Symbol;Acc:HGNC:4942]                      | chr6       | 32637357  | 32643652  | 1758 |
| DPYD       | 0.786487402  | 6.65613E-40 | 1.9784E-38  | UP     | dihydropyrimidine dehydrogenase [Source:HGNC Symbol;Acc:HGNC:3012]                                             | chr1       | 97077743  | 97921049  | 5607 |
| TRGV8      | 1.427236082  | 7.8467E-40  | 2.32845E-38 | UP     | T-cell receptor gamma variable 8 [Source:HGNC Symbol;Acc:HGNC:12294]                                           | chr7       | 38330343  | 38330935  | 468  |
| CARD17     | 1.511578876  | 8.88493E-40 | 2.63223E-38 | UP     | caspase recruitment domain family member 17 [Source:HGNC Symbol;Acc:HGNC:33827]                                | chr11      | 105092469 | 105101431 | 466  |
| Xorf21     | 0.987507277  | 1.03815E-39 | 3.0656E-38  | UP     | chromosome X open reading frame 21 [Source:HGNC Symbol;Acc:HGNC:25667]                                         | chrX       | 30558824  | 30577844  | 1855 |
| SPOCK2     | 1.035891283  | 1.09165E-39 | 3.21832E-38 | UP     | SPARC/osteonectin, cwcv and kazal like domains proteoglycan 2 [Source:HGNC Symbol;Acc:HGNC:13564]              | chr10      | 72059035  | 72089032  | 6260 |
| C4orf50    | 1.345688051  | 1.12423E-39 | 3.30899E-38 | UP     | chromosome 4 open reading frame 50 [Source:HGNC Symbol;Acc:HGNC:33766]                                         | chr4       | 5897591   | 6018507   | 7675 |
| EVI2A      | 1.064224235  | 1.28124E-39 | 3.76501E-38 | UP     | ecotropic viral integration site 2A [Source:HGNC Symbol;Acc:HGNC:3499]                                         | chr17      | 31317560  | 31321884  | 2071 |
| CSF1       | 0.709861623  | 1.32921E-39 | 3.89967E-38 | UP     | colony stimulating factor 1 [Source:HGNC Symbol;Acc:HGNC:2432]                                                 | chr1       | 109910633 | 109930992 | 4891 |
| IGKV2D-29  | 2.257760103  | 1.41296E-39 | 4.13867E-38 | UP     | immunoglobulin kappa variable 2D-29 [Source:HGNC Symbol;Acc:HGNC:5800]                                         | chr2       | 89947970  | 89948279  | 310  |
| MCUB       | 0.68358825   | 1.45405E-39 | 4.25216E-38 | UP     | mitochondrial calcium uniporter dominant negative beta subunit [Source:HGNC Symbol;Acc:HGNC:26076]             | chr4       | 109560205 | 109688726 | 2278 |
| AADAT      | -0.779515824 | 1.59729E-39 | 4.66352E-38 | DOWN   | aminoadipate aminotransferase [Source:HGNC Symbol;Acc:HGNC:17929]                                              | chr4       | 170060222 | 170090387 | 2514 |
| TRBV24-1   | 1.43619969   | 1.84363E-39 | 5.3741E-38  | UP     | T-cell receptor beta variable 24-1 [Source:HGNC Symbol;Acc:HGNC:12203]                                         | chr7       | 142656701 | 142657213 | 381  |
| LRRC25     | 0.909923724  | 1.8792E-39  | 5.46899E-38 | UP     | leucine rich repeat containing 25 [Source:HGNC Symbol;Acc:HGNC:29806]                                          | chr19      | 18391144  | 18397617  | 2415 |
| TNFAIP8    | 0.600328476  | 2.02679E-39 | 5.88905E-38 | UP     | TNF alpha induced protein 8 [Source:HGNC Symbol;Acc:HGNC:17260]                                                | chr5       | 119268692 | 119399688 | 9473 |
| TLR10      | 1.385566987  | 2.04176E-39 | 5.92306E-38 | UP     | toll like receptor 10 [Source:HGNC Symbol;Acc:HGNC:15634]                                                      | chr4       | 38772239  | 38782990  | 4136 |
| SCML4      | 1.513937637  | 2.14782E-39 | 6.22078E-38 | UP     | sex comb on midleg like 4 (Drosophila) [Source:HGNC Symbol;Acc:HGNC:21397]                                     | chr6       | 107704104 | 107824317 | 4173 |
| IGKV3D-20  | 2.212860339  | 2.2459E-39  | 6.49448E-38 | UP     | immunoglobulin kappa variable 3D-20 [Source:HGNC Symbol;Acc:HGNC:5825]                                         | chr2       | 90038848  | 90039479  | 445  |
| BTBD16     | -1.986845068 | 2.58969E-39 | 7.47671E-38 | DOWN   | BTB domain containing 16 [Source:HGNC Symbol;Acc:HGNC:26340]                                                   | chr10      | 122271306 | 122338162 | 1849 |
| LAT2       | 0.808784584  | 2.93812E-39 | 8.46915E-38 | UP     | linker for activation of T-cells family member 2 [Source:HGNC Symbol;Acc:HGNC:12749]                           | chr7       | 74209396  | 74229834  | 4118 |
| HLA-DQA2   | 1.784807313  | 2.9878E-39  | 8.59871E-38 | UP     | major histocompatibility complex, class II, DQ alpha 2 [Source:HGNC Symbol;Acc:HGNC:4943]                      | chr6       | 32741342  | 32747215  | 1524 |
| HK3        | 1.057692106  | 3.29451E-39 | 9.46637E-38 | UP     | hexokinase 3 [Source:HGNC Symbol;Acc:HGNC:4925]                                                                | chr5       | 176880871 | 176899332 | 3066 |
| TNFRSF18   | 1.245281015  | 4.32446E-39 | 1.24062E-37 | UP     | TNF receptor superfamily member 18 [Source:HGNC Symbol;Acc:HGNC:11914]                                         | chr1       | 1203508   | 1206691   | 1370 |
| IGLV7-43   | 1.928636321  | 5.20645E-39 | 1.49128E-37 | UP     | immunoglobulin lambda variable 7-43 [Source:HGNC Symbol;Acc:HGNC:5929]                                         | chr22      | 22395018  | 22395489  | 385  |
| TCN2       | 0.681669734  | 8.83175E-39 | 2.51774E-37 | UP     | transcobalamin 2 [Source:HGNC Symbol;Acc:HGNC:11653]                                                           | chr22      | 30606838  | 30627278  | 2636 |
| MEFV       | 1.125249141  | 9.08784E-39 | 2.58668E-37 | UP     | MEFV, pyrin innate immunity regulator [Source:HGNC Symbol;Acc:HGNC:6998]                                       | chr16      | 3242028   | 3256627   | 3767 |



| PARAM      | logFC        | pval        | pval.adj    | UPDOWN | desc                                                                                                     | chr   | start     | end       | size  |
|------------|--------------|-------------|-------------|--------|----------------------------------------------------------------------------------------------------------|-------|-----------|-----------|-------|
| MS4AA4     | 0.922004801  | 1.05011E-38 | 2.98424E-37 | UP     | membrane spanning 4-domains A4A [Source:HGNC Symbol;Acc:HGNC:13371]                                      | chr11 | 60280541  | 60308972  | 1649  |
| ITGAX      | 0.874960855  | 1.22275E-38 | 3.46942E-37 | UP     | integrin subunit alpha X [Source:HGNC Symbol;Acc:HGNC:6152]                                              | chr16 | 31355134  | 31382997  | 5794  |
| ADA        | 0.737856869  | 1.45378E-38 | 4.1185E-37  | UP     | adenosine deaminase [Source:HGNC Symbol;Acc:HGNC:186]                                                    | chr20 | 44619522  | 44651742  | 1539  |
| IGKV2D-28  | 2.032098361  | 1.69086E-38 | 4.78269E-37 | UP     | immunoglobulin kappa variable 2D-28 [Source:HGNC Symbol;Acc:HGNC:5799]                                   | chr2  | 89960449  | 89960754  | 306   |
| IGHV3-73   | 2.324880055  | 2.51005E-38 | 7.08874E-37 | UP     | immunoglobulin heavy variable 3-73 [Source:HGNC Symbol;Acc:HGNC:5623]                                    | chr14 | 106802694 | 106803233 | 437   |
| SIGLEC7    | 0.950236051  | 2.71588E-38 | 7.65811E-37 | UP     | sialic acid binding Ig like lectin 7 [Source:HGNC Symbol;Acc:HGNC:10876]                                 | chr19 | 51142301  | 51153526  | 1754  |
| RGS10      | 0.647050414  | 3.80607E-38 | 1.07155E-36 | UP     | regulator of G protein signaling 10 [Source:HGNC Symbol;Acc:HGNC:9992]                                   | chr10 | 119499828 | 119542708 | 1024  |
| SAMD9      | 0.853242643  | 4.90929E-38 | 1.38E-36    | UP     | sterile alpha motif domain containing 9 [Source:HGNC Symbol;Acc:HGNC:1348]                               | chr7  | 93099513  | 93118023  | 6855  |
| NOD2       | 0.911374046  | 5.42158E-38 | 1.52165E-36 | UP     | nucleotide binding oligomerization domain containing 2 [Source:HGNC Symbol;Acc:HGNC:5331]                | chr16 | 50697139  | 50733077  | 4486  |
| DOK3       | 0.764639298  | 7.99451E-38 | 2.24032E-36 | UP     | docking protein 3 [Source:HGNC Symbol;Acc:HGNC:24583]                                                    | chr5  | 177501907 | 177510385 | 3451  |
| IGLV2-5    | 1.709712583  | 9.24867E-38 | 2.58777E-36 | UP     | immunoglobulin lambda variable 2-5 (pseudogene) [Source:HGNC Symbol;Acc:HGNC:5894]                       | chr22 | 22856762  | 22857038  | 277   |
| BST2       | 0.962501312  | 1.04978E-37 | 2.93276E-36 | UP     | bone marrow stromal cell antigen 2 [Source:HGNC Symbol;Acc:HGNC:1119]                                    | chr19 | 17402939  | 17405648  | 1019  |
| LAP3P2     | 0.837500106  | 1.0874E-37  | 3.03317E-36 | UP     | leucine aminopeptidase 3 pseudogene 2 [Source:HGNC Symbol;Acc:HGNC:42365]                                | chr6  | 36673817  | 36675270  | 1454  |
| RNASE6     | 0.851086463  | 1.0985E-37  | 3.05942E-36 | UP     | ribonuclease A family member k6 [Source:HGNC Symbol;Acc:HGNC:10048]                                      | chr14 | 20781051  | 20782467  | 1061  |
| IGLV7-46   | 2.139137446  | 1.12076E-37 | 3.11665E-36 | UP     | immunoglobulin lambda variable 7-46 (gene/pseudogene) [Source:HGNC Symbol;Acc:HGNC:5930]                 | chr22 | 22369614  | 22370087  | 385   |
| SLC31A2    | 0.757860509  | 1.49916E-37 | 4.14981E-36 | UP     | solute carrier family 31 member 2 [Source:HGNC Symbol;Acc:HGNC:11017]                                    | chr9  | 113150942 | 113164137 | 1785  |
| IGLV9-49   | 1.843806294  | 1.96468E-37 | 5.43013E-36 | UP     | immunoglobulin lambda variable 9-49 [Source:HGNC Symbol;Acc:HGNC:5933]                                   | chr22 | 22343187  | 22343732  | 409   |
| IGLV3-27   | 2.265787184  | 2.07211E-37 | 5.71832E-36 | UP     | immunoglobulin lambda variable 3-27 [Source:HGNC Symbol;Acc:HGNC:5910]                                   | chr22 | 22668288  | 22668806  | 377   |
| TOX3       | -2.427702294 | 2.30652E-37 | 6.35555E-36 | DOWN   | TOX high mobility group box family member 3 [Source:HGNC Symbol;Acc:HGNC:11972]                          | chr16 | 52438005  | 52547802  | 3499  |
| CTSW       | 1.056759923  | 2.84099E-37 | 7.81639E-36 | UP     | cathepsin W [Source:HGNC Symbol;Acc:HGNC:2546]                                                           | chr11 | 65879809  | 65883741  | 1383  |
| SLFN11     | 0.732370652  | 3.30258E-37 | 9.07259E-36 | UP     | schlafen family member 11 [Source:HGNC Symbol;Acc:HGNC:26633]                                            | chr17 | 35350305  | 35373620  | 5138  |
| VIPR1      | -1.30115995  | 3.39271E-37 | 9.30608E-36 | DOWN   | vasoactive intestinal peptide receptor 1 [Source:HGNC Symbol;Acc:HGNC:12694]                             | chr3  | 42489299  | 42537573  | 3369  |
| VNN2       | 1.082335786  | 3.41042E-37 | 9.33637E-36 | UP     | vanin 2 [Source:HGNC Symbol;Acc:HGNC:12706]                                                              | chr6  | 132743870 | 132763447 | 2183  |
| FCRL2      | 1.75112625   | 3.41405E-37 | 9.33637E-36 | UP     | Fc receptor like 2 [Source:HGNC Symbol;Acc:HGNC:14875]                                                   | chr1  | 157745733 | 157771322 | 3095  |
| IGKV1-33   | 2.11822108   | 3.46841E-37 | 9.47074E-36 | UP     | immunoglobulin kappa variable 1-33 [Source:HGNC Symbol;Acc:HGNC:5737]                                    | chr2  | 89266494  | 89268285  | 324   |
| MAML3      | -0.606812009 | 4.31427E-37 | 1.17627E-35 | DOWN   | mastermind like transcriptional coactivator 3 [Source:HGNC Symbol;Acc:HGNC:16272]                        | chr4  | 139716753 | 140154184 | 7012  |
| STAP1      | 1.434664358  | 4.33921E-37 | 1.18129E-35 | UP     | signal transducing adaptor family member 1 [Source:HGNC Symbol;Acc:HGNC:24133]                           | chr4  | 67558728  | 67607337  | 1655  |
| AC247036.4 | 2.168772635  | 6.01042E-37 | 1.63381E-35 | UP     |                                                                                                          | chr14 | 106088122 | 106088573 | 353   |
| IGHV1-58   | 2.207542448  | 6.01991E-37 | 1.63394E-35 | UP     | immunoglobulin heavy variable 1-58 [Source:HGNC Symbol;Acc:HGNC:5555]                                    | chr14 | 106622357 | 106622855 | 414   |
| KCNAB2     | 0.649937611  | 6.39171E-37 | 1.73226E-35 | UP     | potassium voltage-gated channel subfamily A regulatory beta subunit 2 [Source:HGNC Symbol;Acc:HGNC:6229] | chr1  | 59914466  | 6101193   | 6916  |
| HNRNPA1P70 | 1.367242023  | 1.04532E-36 | 2.82876E-35 | UP     | heterogeneous nuclear ribonucleoprotein A1 pseudogene 70 [Source:HGNC Symbol;Acc:HGNC:48800]             | chr12 | 68035767  | 68036853  | 1087  |
| GMFG       | 0.686919425  | 1.05079E-36 | 2.83932E-35 | UP     | glia maturation factor gamma [Source:HGNC Symbol;Acc:HGNC:4374]                                          | chr19 | 39328353  | 39342372  | 1317  |
| UPK1A      | -2.337473836 | 1.06793E-36 | 2.88134E-35 | DOWN   | uroplakin 1A [Source:HGNC Symbol;Acc:HGNC:12577]                                                         | chr19 | 35666516  | 35678483  | 1366  |
| CCL4L2     | 1.451373756  | 1.09057E-36 | 2.93805E-35 | UP     | C-C motif chemokine ligand 4 like 2 [Source:HGNC Symbol;Acc:HGNC:24066]                                  | chr17 | 36210924  | 36212878  | 1397  |
| TRGV3      | 1.400456309  | 1.10206E-36 | 2.96462E-35 | UP     | T-cell receptor gamma variable 3 [Source:HGNC Symbol;Acc:HGNC:12288]                                     | chr7  | 38358512  | 38359162  | 537   |
| HLA-DRB6   | 1.238179621  | 1.14418E-36 | 3.07334E-35 | UP     | major histocompatibility complex, class II, DR beta 6 (pseudogene) [Source:HGNC Symbol;Acc:HGNC:4954]    | chr6  | 32552713  | 32560022  | 1326  |
| DNAJC5B    | 1.447143471  | 1.68215E-36 | 4.5117E-35  | UP     | Dnaj heat shock protein family (Hsp40) member C5 beta [Source:HGNC Symbol;Acc:HGNC:24138]                | chr8  | 66021560  | 66100526  | 1382  |
| NAIP       | 0.863043201  | 1.69927E-36 | 4.55089E-35 | UP     | NLR family apoptosis inhibitory protein [Source:HGNC Symbol;Acc:HGNC:7634]                               | chr5  | 70968483  | 71025114  | 6677  |
| CD40       | 0.736652503  | 2.08536E-36 | 5.56844E-35 | UP     | CD40 molecule [Source:HGNC Symbol;Acc:HGNC:11919]                                                        | chr20 | 46118272  | 46129863  | 1888  |
| ACER2      | -1.400999083 | 2.15204E-36 | 5.73804E-35 | DOWN   | alkaline ceramidase 2 [Source:HGNC Symbol;Acc:HGNC:23675]                                                | chr9  | 19409059  | 19452020  | 2238  |
| IGHA1      | 1.808920047  | 2.24037E-36 | 5.96479E-35 | UP     | immunoglobulin heavy constant alpha 1 [Source:HGNC Symbol;Acc:HGNC:5478]                                 | chr14 | 105703995 | 105708665 | 1310  |
| TLE2       | -0.914909836 | 2.43282E-36 | 6.46767E-35 | DOWN   | transducin like enhancer of split 2 [Source:HGNC Symbol;Acc:HGNC:11838]                                  | chr19 | 2997638   | 3047635   | 2929  |
| TRAK1      | -0.602105035 | 2.93623E-36 | 7.78317E-35 | DOWN   | trafficking kinesin protein 1 [Source:HGNC Symbol;Acc:HGNC:29947]                                        | chr3  | 42013802  | 42225889  | 10772 |
| HPSE       | 0.813875142  | 2.98111E-36 | 7.89059E-35 | UP     | heparanase [Source:HGNC Symbol;Acc:HGNC:5164]                                                            | chr4  | 83292461  | 83335153  | 4721  |
| IL18R1     | 0.794721783  | 3.59013E-36 | 9.47491E-35 | UP     | interleukin 18 receptor 1 [Source:HGNC Symbol;Acc:HGNC:5988]                                             | chr2  | 102355929 | 102398775 | 3916  |
| TRAF1      | 0.711924564  | 4.02004E-36 | 1.05941E-34 | UP     | TNF receptor associated factor 1 [Source:HGNC Symbol;Acc:HGNC:12031]                                     | chr9  | 120902393 | 120929173 | 6449  |
| FCGR2A     | 0.83107366   | 4.3027E-36  | 1.13225E-34 | UP     | Fc fragment of IgG receptor IIa [Source:HGNC Symbol;Acc:HGNC:3616]                                       | chr1  | 161505430 | 161519568 | 2412  |
| CACNA1D    | -1.390483724 | 4.89593E-36 | 1.28649E-34 | DOWN   | calcium voltage-gated channel subunit alpha1 D [Source:HGNC Symbol;Acc:HGNC:1391]                        | chr3  | 53328963  | 53813733  | 11489 |
| GPRIN3     | 0.767635246  | 5.28576E-36 | 1.38692E-34 | UP     | GPRIN family member 3 [Source:HGNC Symbol;Acc:HGNC:27733]                                                | chr4  | 89236386  | 89308010  | 15205 |
| CD40LG     | 1.287478187  | 5.60883E-36 | 1.46956E-34 | UP     | CD40 ligand [Source:HGNC Symbol;Acc:HGNC:11935]                                                          | chrX  | 136648193 | 136660390 | 1817  |
| TNFAIP8L2  | 0.988116872  | 5.76288E-36 | 1.50774E-34 | UP     | TNF alpha induced protein 8 like 2 [Source:HGNC Symbol;Acc:HGNC:26277]                                   | chr1  | 151156629 | 151159749 | 1178  |
| EMP3       | 0.758356736  | 6.00616E-36 | 1.56913E-34 | UP     | epithelial membrane protein 3 [Source:HGNC Symbol;Acc:HGNC:3335]                                         | chr19 | 48325325  | 48330553  | 939   |
| NCF4       | 0.717224402  | 7.16899E-36 | 1.87023E-34 | UP     | neutrophil cytosolic factor 4 [Source:HGNC Symbol;Acc:HGNC:7662]                                         | chr22 | 36860988  | 36878015  | 1641  |
| RAB15      | -0.905271795 | 7.22621E-36 | 1.88245E-34 | DOWN   | RAB15, member RAS oncogene family [Source:HGNC Symbol;Acc:HGNC:20150]                                    | chr14 | 64945814  | 64972414  | 3697  |
| IGLV3-16   | 1.675512765  | 7.35622E-36 | 1.91357E-34 | UP     | immunoglobulin lambda variable 3-16 [Source:HGNC Symbol;Acc:HGNC:5901]                                   | chr22 | 22747383  | 22747921  | 385   |
| SNX31      | -2.199054629 | 8.7219E-36  | 2.26557E-34 | DOWN   | sorting nexin 31 [Source:HGNC Symbol;Acc:HGNC:28605]                                                     | chr8  | 100572882 | 100649665 | 2520  |
| RAB39A     | 1.053355601  | 9.23378E-36 | 2.3951E-34  | UP     | RAB39A, member RAS oncogene family [Source:HGNC Symbol;Acc:HGNC:16521]                                   | chr11 | 107928503 | 107963482 | 1830  |

| PARAM       | logFC        | pval        | pval.adj    | UPDOWN | desc                                                                                                                      | chr   | start     | end       | size |
|-------------|--------------|-------------|-------------|--------|---------------------------------------------------------------------------------------------------------------------------|-------|-----------|-----------|------|
| NCF2        | 0.835655762  | 9.5709E-36  | 2.479E-34   | UP     | neutrophil cytosolic factor 2 [Source:HGNC Symbol;Acc:HGNC:7661]                                                          | chr1  | 183555563 | 183590876 | 2448 |
| EBI3        | 1.081215043  | 1.00668E-35 | 2.60002E-34 | UP     | Einstein-Barr virus induced 3 [Source:HGNC Symbol;Acc:HGNC:3129]                                                          | chr19 | 4229498   | 4237531   | 1186 |
| FCGR2C      | 1.033451713  | 1.3886E-35  | 3.58133E-34 | UP     | Fc fragment of IgG receptor IIc (gene/pseudogene) [Source:HGNC Symbol;Acc:HGNC:15626]                                     | chr1  | 161581339 | 161600242 | 1510 |
| TNFSF8      | 1.020427064  | 1.52424E-35 | 3.92556E-34 | UP     | TNF superfamily member 8 [Source:HGNC Symbol;Acc:HGNC:11938]                                                              | chr9  | 114893343 | 114930595 | 2906 |
| IGLV2-18    | 2.204379181  | 1.9443E-35  | 5.00031E-34 | UP     | immunoglobulin lambda variable 2-18 [Source:HGNC Symbol;Acc:HGNC:5889]                                                    | chr22 | 22734607  | 22735089  | 367  |
| AC079316.1  | 0.890205101  | 2.36385E-35 | 6.07067E-34 | UP     |                                                                                                                           | chr12 | 104514029 | 104514439 | 411  |
| MAGI1       | -0.591767571 | 2.4939E-35  | 6.3956E-34  | DOWN   | membrane associated guanylate kinase, WW and PDZ domain containing 1 [Source:HGNC Symbol;Acc:HGNC:946]                    | chr3  | 65353525  | 66038550  | 8490 |
| IL16        | 0.806551819  | 2.57808E-35 | 6.60215E-34 | UP     | interleukin 16 [Source:HGNC Symbol;Acc:HGNC:5980]                                                                         | chr15 | 81196879  | 81314058  | 9634 |
| GPR183      | 1.053705446  | 3.97112E-35 | 1.01266E-33 | UP     | G protein-coupled receptor 183 [Source:HGNC Symbol;Acc:HGNC:3128]                                                         | chr13 | 99294530  | 99307405  | 1700 |
| SPINK1      | -2.564330767 | 4.0832E-35  | 1.03978E-33 | DOWN   | serine peptidase inhibitor, Kazal type 1 [Source:HGNC Symbol;Acc:HGNC:11244]                                              | chr5  | 147824568 | 147831786 | 1478 |
| HLA-DQB1    | 1.234054784  | 4.18635E-35 | 1.06455E-33 | UP     | major histocompatibility complex, class II, DQ beta 1 [Source:HGNC Symbol;Acc:HGNC:4944]                                  | chr6  | 32659467  | 32668383  | 1782 |
| IGHV3-66    | 2.23416034   | 4.70903E-35 | 1.19579E-33 | UP     | immunoglobulin heavy variable 3-66 [Source:HGNC Symbol;Acc:HGNC:5619]                                                     | chr14 | 106675017 | 106675544 | 427  |
| TNFAIP3     | 0.806163771  | 5.09132E-35 | 1.29106E-33 | UP     | TNF alpha induced protein 3 [Source:HGNC Symbol;Acc:HGNC:11896]                                                           | chr6  | 137867188 | 137883312 | 4738 |
| FAM46C      | 0.988994684  | 5.55781E-35 | 1.40542E-33 | UP     | family with sequence similarity 46 member C [Source:HGNC Symbol;Acc:HGNC:24712]                                           | chr1  | 117605934 | 117628372 | 5751 |
| HVCN1       | 0.734643379  | 6.31148E-35 | 1.59378E-33 | UP     | hydrogen voltage gated channel 1 [Source:HGNC Symbol;Acc:HGNC:28240]                                                      | chr12 | 110627841 | 110689778 | 2876 |
| ZBTB7C      | -1.323713978 | 9.37867E-35 | 2.35846E-33 | DOWN   | zinc finger and BTB domain containing 7C [Source:HGNC Symbol;Acc:HGNC:31700]                                              | chr18 | 48026673  | 48409422  | 5788 |
| ABAT        | -0.915447301 | 1.01524E-34 | 2.54597E-33 | DOWN   | 4-aminobutyrate aminotransferase [Source:HGNC Symbol;Acc:HGNC:23]                                                         | chr16 | 8674565   | 8784575   | 6025 |
| LNX1        | -0.915993141 | 1.03968E-34 | 2.60366E-33 | DOWN   | ligand of numb-protein X 1 [Source:HGNC Symbol;Acc:HGNC:6657]                                                             | chr4  | 53459301  | 53591616  | 4452 |
| CLIC2       | 0.717029728  | 1.15138E-34 | 2.8794E-33  | UP     | chloride intracellular channel 2 [Source:HGNC Symbol;Acc:HGNC:2063]                                                       | chrX  | 155276211 | 155334646 | 2655 |
| VAMP5       | 0.642662862  | 1.20665E-34 | 3.01348E-33 | UP     | vesicle associated membrane protein 5 [Source:HGNC Symbol;Acc:HGNC:12646]                                                 | chr2  | 85584408  | 85593412  | 689  |
| IGKV1-8     | 2.135612944  | 1.38701E-34 | 3.45912E-33 | UP     | immunoglobulin kappa variable 1-8 [Source:HGNC Symbol;Acc:HGNC:5743]                                                      | chr2  | 88992409  | 88992931  | 398  |
| IFI27       | 1.233679993  | 1.51361E-34 | 3.76969E-33 | UP     | interferon alpha inducible protein 27 [Source:HGNC Symbol;Acc:HGNC:5397]                                                  | chr14 | 94110733  | 94116698  | 827  |
| CD33        | 0.803154611  | 1.88537E-34 | 4.68913E-33 | UP     | CD33 molecule [Source:HGNC Symbol;Acc:HGNC:1659]                                                                          | chr19 | 51225064  | 51240016  | 2374 |
| IGHV1OR15-2 | 1.570162481  | 2.13635E-34 | 5.30604E-33 | UP     | immunoglobulin heavy variable 1/OR15-2 (pseudogene) [Source:HGNC Symbol;Acc:HGNC:5564]                                    | chr15 | 19972782  | 19973218  | 353  |
| PRKCB       | 0.87382707   | 2.9204E-34  | 7.23358E-33 | UP     | protein kinase C beta [Source:HGNC Symbol;Acc:HGNC:9395]                                                                  | chr16 | 23836001  | 24220611  | 8205 |
| TRGV5       | 1.460810046  | 3.1511E-34  | 7.78372E-33 | UP     | T-cell receptor gamma variable 5 [Source:HGNC Symbol;Acc:HGNC:12290]                                                      | chr7  | 38349355  | 38350022  | 552  |
| TNFRSF8     | 1.139536767  | 3.62128E-34 | 8.92086E-33 | UP     | TNF receptor superfamily member 8 [Source:HGNC Symbol;Acc:HGNC:11923]                                                     | chr1  | 12063377  | 12144207  | 3738 |
| IGKV1D-13   | 2.133915397  | 3.67506E-34 | 9.04103E-33 | UP     | immunoglobulin kappa variable 1D-13 [Source:HGNC Symbol;Acc:HGNC:5747]                                                    | chr2  | 90154073  | 90154574  | 376  |
| KIR3DL1     | 1.436746268  | 4.99309E-34 | 1.22337E-32 | UP     | killer cell immunoglobulin like receptor, three Ig domains and long cytoplasmic tail 1 [Source:HGNC Symbol;Acc:HGNC:6338] | chr19 | 54816468  | 54830778  | 1871 |
| ATP9A       | -0.596903082 | 5.21032E-34 | 1.27488E-32 | DOWN   | ATPase phospholipid transporting 9A (putative) [Source:HGNC Symbol;Acc:HGNC:13540]                                        | chr20 | 51596514  | 51768634  | 8106 |
| CARMIL2     | 0.987751786  | 8.0447E-34  | 1.96575E-32 | UP     | capping protein regulator and myosin 1 linker 2 [Source:HGNC Symbol;Acc:HGNC:27089]                                       | chr16 | 67644919  | 67657569  | 4687 |
| IGHV1-3     | 2.51708176   | 8.42243E-34 | 2.05251E-32 | UP     | immunoglobulin heavy variable 1-3 [Source:HGNC Symbol;Acc:HGNC:5552]                                                      | chr14 | 106005095 | 106005574 | 395  |
| CD14        | 0.761922189  | 1.20817E-33 | 2.93638E-32 | UP     | CD14 molecule [Source:HGNC Symbol;Acc:HGNC:1628]                                                                          | chr5  | 140631728 | 140633701 | 1886 |
| FPR2        | 1.292041508  | 1.30398E-33 | 3.16499E-32 | UP     | formyl peptide receptor 2 [Source:HGNC Symbol;Acc:HGNC:3827]                                                              | chr19 | 51760851  | 51770526  | 3020 |
| CD79B       | 1.214791806  | 1.84566E-33 | 4.46778E-32 | UP     | CD79b molecule [Source:HGNC Symbol;Acc:HGNC:1699]                                                                         | chr17 | 63928740  | 63932354  | 1272 |
| HRH2        | 0.877092013  | 2.18143E-33 | 5.27354E-32 | UP     | histamine receptor H2 [Source:HGNC Symbol;Acc:HGNC:5183]                                                                  | chr5  | 175658030 | 175710756 | 5543 |
| UPK2        | -2.17994685  | 2.22626E-33 | 5.37212E-32 | DOWN   | uroplakin 2 [Source:HGNC Symbol;Acc:HGNC:12579]                                                                           | chr11 | 118956316 | 118958559 | 916  |
| GLI1        | 0.694887029  | 2.22814E-33 | 5.37212E-32 | UP     | GLI pathogenesis related 2 [Source:HGNC Symbol;Acc:HGNC:18007]                                                            | chr9  | 36136536  | 36163913  | 2185 |
| FLI1        | 0.638515614  | 2.3031E-33  | 5.54549E-32 | UP     | Fli-1 proto-oncogene, ETS transcription factor [Source:HGNC Symbol;Acc:HGNC:3749]                                         | chr11 | 128686535 | 128813267 | 4519 |
| DERL3       | 1.140923163  | 2.67984E-33 | 6.42702E-32 | UP     | derlin 3 [Source:HGNC Symbol;Acc:HGNC:14236]                                                                              | chr22 | 23834503  | 23839012  | 3336 |
| SUCNR1      | 1.087403833  | 3.00467E-33 | 7.19652E-32 | UP     | succinate receptor 1 [Source:HGNC Symbol;Acc:HGNC:4542]                                                                   | chr3  | 151873643 | 151884619 | 4181 |
| Cxorf65     | 1.189372138  | 3.04097E-33 | 7.27385E-32 | UP     | chromosome X open reading frame 65 [Source:HGNC Symbol;Acc:HGNC:33713]                                                    | chrX  | 71103987  | 71106605  | 601  |
| CYSLTR2     | 1.03696385   | 3.10637E-33 | 7.42049E-32 | UP     | cysteinyl leukotriene receptor 2 [Source:HGNC Symbol;Acc:HGNC:18274]                                                      | chr13 | 48653711  | 48711226  | 5220 |
| LARGE1      | -0.65740851  | 3.58555E-33 | 8.55389E-32 | DOWN   | LARGE xylosyl- and glucuronyltransferase 1 [Source:HGNC Symbol;Acc:HGNC:6511]                                             | chr22 | 33272861  | 33920428  | 4416 |
| ITGAM       | 0.787196557  | 4.31012E-33 | 1.02555E-31 | UP     | integrin subunit alpha M [Source:HGNC Symbol;Acc:HGNC:6149]                                                               | chr16 | 31259990  | 31332892  | 4722 |
| GPR141      | 0.987626298  | 4.42868E-33 | 1.05238E-31 | UP     | G protein-coupled receptor 141 [Source:HGNC Symbol;Acc:HGNC:19997]                                                        | chr7  | 37683872  | 37741374  | 1270 |
| HLA-DQB2    | 1.298662711  | 4.73512E-33 | 1.12372E-31 | UP     | major histocompatibility complex, class II, DQ beta 2 [Source:HGNC Symbol;Acc:HGNC:4945]                                  | chr6  | 32756098  | 32763534  | 2028 |
| FPR1        | 0.93779886   | 4.86801E-33 | 1.15375E-31 | UP     | formyl peptide receptor 1 [Source:HGNC Symbol;Acc:HGNC:3826]                                                              | chr19 | 51745172  | 51751909  | 1981 |
| APOE        | 1.023176916  | 4.92674E-33 | 1.16614E-31 | UP     | apolipoprotein E [Source:HGNC Symbol;Acc:HGNC:613]                                                                        | chr19 | 44905754  | 44909393  | 1208 |
| TNFSF10     | 0.92455333   | 4.98908E-33 | 1.17936E-31 | UP     | TNF superfamily member 10 [Source:HGNC Symbol;Acc:HGNC:11925]                                                             | chr3  | 172505508 | 172523507 | 1953 |
| GCSAM       | 1.159164966  | 5.37676E-33 | 1.2677E-31  | UP     | germinal center associated signaling and motility [Source:HGNC Symbol;Acc:HGNC:20253]                                     | chr3  | 112120841 | 112133305 | 3342 |
| CYSLTR1     | 0.859979272  | 6.08339E-33 | 1.43244E-31 | UP     | cysteinyl leukotriene receptor 1 [Source:HGNC Symbol;Acc:HGNC:17451]                                                      | chrX  | 78271464  | 78327691  | 2784 |
| IGKV6-21    | 1.842786304  | 6.10096E-33 | 1.43471E-31 | UP     | immunoglobulin kappa variable 6-21 (non-functional) [Source:HGNC Symbol;Acc:HGNC:5836]                                    | chr2  | 89159751  | 89160366  | 406  |
| LINC01341   | -1.022570427 | 6.56413E-33 | 1.54164E-31 | DOWN   | long intergenic non-protein coding RNA 1341 [Source:HGNC Symbol;Acc:HGNC:49457]                                           | chr1  | 246776013 | 246792385 | 2693 |
| USP18       | 0.725657462  | 6.64696E-33 | 1.55907E-31 | UP     | ubiquitin specific peptidase 18 [Source:HGNC Symbol;Acc:HGNC:12616]                                                       | chr22 | 18149899  | 18177397  | 2129 |
| IGKV2D-30   | 1.73112413   | 7.675E-33   | 1.79555E-31 | UP     | immunoglobulin kappa variable 2D-30 [Source:HGNC Symbol;Acc:HGNC:5801]                                                    | chr2  | 89936859  | 89937679  | 395  |
| IGHV3OR16-8 | 1.604213507  | 7.72342E-33 | 1.80455E-31 | UP     | immunoglobulin heavy variable 3/OR16-8 (non-functional) [Source:HGNC Symbol;Acc:HGNC:5643]                                | chr16 | 33009175  | 33009620  | 349  |

| PARAM      | logFC        | pval        | pval.adj    | UPDOWN | desc                                                                                               | chr   | start     | end       | size  |
|------------|--------------|-------------|-------------|--------|----------------------------------------------------------------------------------------------------|-------|-----------|-----------|-------|
| IGLV3-12   | 1.735610218  | 8.02125E-33 | 1.87173E-31 | UP     | immunoglobulin lambda variable 3-12 [Source:HGNC Symbol;Acc:HGNC:5898]                             | chr22 | 22771824  | 22772582  | 356   |
| PLA2G2F    | -2.104372153 | 8.47318E-33 | 1.97464E-31 | DOWN   | phospholipase A2 group IIF [Source:HGNC Symbol;Acc:HGNC:30040]                                     | chr1  | 20139326  | 20150386  | 2723  |
| NLRCA      | 0.844538056  | 8.78585E-33 | 2.04488E-31 | UP     | NLR family CARD domain containing 4 [Source:HGNC Symbol;Acc:HGNC:16412]                            | chr2  | 32224453  | 32265854  | 3624  |
| ADGRE2     | 0.722171847  | 9.24187E-33 | 2.14826E-31 | UP     | adhesion G protein-coupled receptor E2 [Source:HGNC Symbol;Acc:HGNC:3337]                          | chr19 | 14732393  | 14778537  | 7379  |
| MATK       | 0.94990146   | 9.27736E-33 | 2.15375E-31 | UP     | megakaryocyte-associated tyrosine kinase [Source:HGNC Symbol;Acc:HGNC:6906]                        | chr19 | 3777970   | 3801812   | 2549  |
| IGLV8-61   | 2.163355167  | 1.05788E-32 | 2.44647E-31 | UP     | immunoglobulin lambda variable 8-61 [Source:HGNC Symbol;Acc:HGNC:5931]                             | chr22 | 22098700  | 22099212  | 414   |
| LY86       | 0.888933608  | 1.22707E-32 | 2.83414E-31 | UP     | lymphocyte antigen 86 [Source:HGNC Symbol;Acc:HGNC:16837]                                          | chr6  | 6588108   | 6654983   | 1254  |
| PILRA      | 0.696420303  | 1.24754E-32 | 2.87496E-31 | UP     | paired immunoglobulin like type 2 receptor alpha [Source:HGNC Symbol;Acc:HGNC:20396]               | chr7  | 100373445 | 100400099 | 1316  |
| FLT3       | 1.123244818  | 1.24791E-32 | 2.87496E-31 | UP     | fms related tyrosine kinase 3 [Source:HGNC Symbol;Acc:HGNC:3765]                                   | chr13 | 28003274  | 28100592  | 3842  |
| CCL18      | 1.525810986  | 1.44497E-32 | 3.31629E-31 | UP     | C-C motif chemokine ligand 18 [Source:HGNC Symbol;Acc:HGNC:10616]                                  | chr17 | 36064280  | 36072032  | 1324  |
| OGFRL1     | 0.704846058  | 1.70607E-32 | 3.91059E-31 | UP     | opioid growth factor receptor like 1 [Source:HGNC Symbol;Acc:HGNC:21378]                           | chr6  | 71288803  | 71308950  | 8391  |
| ATP8B4     | 0.636176965  | 2.73925E-32 | 6.25509E-31 | UP     | ATPase phospholipid transporting 8B4 (putative) [Source:HGNC Symbol;Acc:HGNC:13536]                | chr15 | 49858239  | 50119222  | 5755  |
| FCMR       | 1.087064036  | 3.30165E-32 | 7.52985E-31 | UP     | Fc fragment of IgM receptor [Source:HGNC Symbol;Acc:HGNC:14315]                                    | chr1  | 206904386 | 206921998 | 1950  |
| KSR2       | -1.561667908 | 3.34623E-32 | 7.62193E-31 | DOWN   | kinase suppressor of ras 2 [Source:HGNC Symbol;Acc:HGNC:18610]                                     | chr12 | 117453012 | 117968983 | 17768 |
| GPR84      | 0.992060464  | 4.14344E-32 | 9.42594E-31 | UP     | G protein-coupled receptor 84 [Source:HGNC Symbol;Acc:HGNC:4535]                                   | chr12 | 54362445  | 54364487  | 2043  |
| AC116347.1 | 0.735882292  | 4.35675E-32 | 9.89877E-31 | UP     |                                                                                                    | chr5  | 98213402  | 98214121  | 720   |
| CXCR5      | 1.379945438  | 5.62902E-32 | 1.27734E-30 | UP     | C-X-C motif chemokine receptor 5 [Source:HGNC Symbol;Acc:HGNC:1060]                                | chr11 | 118883766 | 118897799 | 4431  |
| SIGLEC8    | 1.141551697  | 6.07377E-32 | 1.37654E-30 | UP     | sialic acid binding Ig like lectin 8 [Source:HGNC Symbol;Acc:HGNC:10877]                           | chr19 | 51450847  | 51458456  | 3101  |
| PLCB2      | 0.691790708  | 6.64177E-32 | 1.5034E-30  | UP     | phospholipase C beta 2 [Source:HGNC Symbol;Acc:HGNC:9055]                                          | chr15 | 40287907  | 40307922  | 5559  |
| LGALS2     | 1.52600916   | 7.82117E-32 | 1.76595E-30 | UP     | galectin 2 [Source:HGNC Symbol;Acc:HGNC:6562]                                                      | chr22 | 37570246  | 37580080  | 591   |
| ARVCF      | -0.643560607 | 8.86699E-32 | 1.99959E-30 | DOWN   | armadillo repeat gene deleted in velocardiofacial syndrome [Source:HGNC Symbol;Acc:HGNC:728]       | chr22 | 19969896  | 20016808  | 4062  |
| VCAM1      | 0.958267968  | 9.02713E-32 | 2.03318E-30 | UP     | vascular cell adhesion molecule 1 [Source:HGNC Symbol;Acc:HGNC:12663]                              | chr1  | 100719742 | 100739045 | 3101  |
| SOCS1      | 0.940962185  | 9.51124E-32 | 2.13956E-30 | UP     | suppressor of cytokine signaling 1 [Source:HGNC Symbol;Acc:HGNC:19383]                             | chr16 | 11254405  | 11256179  | 1225  |
| SIRPA      | 0.711191547  | 1.04323E-31 | 2.34385E-30 | UP     | signal regulatory protein alpha [Source:HGNC Symbol;Acc:HGNC:9662]                                 | chr20 | 1894167   | 1940592   | 5068  |
| IGLV1-36   | 2.086995932  | 1.07393E-31 | 2.40984E-30 | UP     | immunoglobulin lambda variable 1-36 [Source:HGNC Symbol;Acc:HGNC:5876]                             | chr22 | 22431958  | 22432465  | 393   |
| IGLC7      | 2.37005755   | 1.13664E-31 | 2.5474E-30  | UP     | immunoglobulin lambda constant 7 [Source:HGNC Symbol;Acc:HGNC:5861]                                | chr22 | 22922594  | 22923034  | 441   |
| CEACAM21   | 0.971949369  | 1.23237E-31 | 2.75853E-30 | UP     | carcinoembryonic antigen related cell adhesion molecule 21 [Source:HGNC Symbol;Acc:HGNC:28834]     | chr19 | 41549518  | 41586844  | 1796  |
| PIK3R6     | 0.745752069  | 1.491E-31   | 3.33333E-30 | UP     | phosphoinositide-3-kinase regulatory subunit 6 [Source:HGNC Symbol;Acc:HGNC:27101]                 | chr17 | 8802737   | 8867677   | 3041  |
| HIVEP3     | 0.718859606  | 1.75678E-31 | 3.92269E-30 | UP     | human immunodeficiency virus type 1 enhancer binding protein 3 [Source:HGNC Symbol;Acc:HGNC:13561] | chr1  | 41506365  | 41918707  | 12402 |
| TM7C       | -0.988741801 | 2.19988E-31 | 4.90602E-30 | DOWN   | transmembrane channel like 7 [Source:HGNC Symbol;Acc:HGNC:23000]                                   | chr16 | 18983934  | 19063942  | 5198  |
| KMO        | 1.052815281  | 2.26275E-31 | 5.04004E-30 | UP     | kynurenine 3-monoxygenase [Source:HGNC Symbol;Acc:HGNC:6381]                                       | chr1  | 241532134 | 241595642 | 5261  |
| CLECA4     | 0.962396104  | 2.42499E-31 | 5.39478E-30 | UP     | C-type lectin domain family 4 member A [Source:HGNC Symbol;Acc:HGNC:13257]                         | chr12 | 8123632   | 8138607   | 1281  |
| MFAP3L     | -0.999027807 | 2.45699E-31 | 5.45927E-30 | DOWN   | microfibril associated protein 3 like [Source:HGNC Symbol;Acc:HGNC:29083]                          | chr4  | 16986597  | 170032212 | 7658  |
| SYTL3      | 0.651343379  | 3.36523E-31 | 7.44085E-30 | UP     | synaptotagmin like 3 [Source:HGNC Symbol;Acc:HGNC:15587]                                           | chr6  | 158550014 | 158764876 | 2896  |
| IGKV3-7    | 1.76166976   | 3.4918E-31  | 7.7113E-30  | UP     | immunoglobulin kappa variable 3-7 (non-functional) [Source:HGNC Symbol;Acc:HGNC:5821]              | chr2  | 88978468  | 88979081  | 445   |
| STK17B     | 0.584990896  | 3.73789E-31 | 8.23468E-30 | UP     | serine/threonine kinase 17b [Source:HGNC Symbol;Acc:HGNC:11396]                                    | chr2  | 196133566 | 196176503 | 5565  |
| OMG        | 1.193167198  | 3.74242E-31 | 8.23468E-30 | UP     | oligodendrocyte myelin glycoprotein [Source:HGNC Symbol;Acc:HGNC:8135]                             | chr17 | 31294647  | 31297411  | 1947  |
| CTSB       | 0.593590432  | 4.06686E-31 | 8.9269E-30  | UP     | cathepsin B [Source:HGNC Symbol;Acc:HGNC:2527]                                                     | chr8  | 11842524  | 11868229  | 4165  |
| IGHV4-4    | 2.361667795  | 4.22363E-31 | 9.25981E-30 | UP     | immunoglobulin heavy variable 4-4 [Source:HGNC Symbol;Acc:HGNC:5652]                               | chr14 | 106011922 | 106012420 | 417   |
| FGR        | 0.679470377  | 4.27373E-31 | 9.35834E-30 | UP     | FGR proto-oncogene, Src family tyrosine kinase [Source:HGNC Symbol;Acc:HGNC:3697]                  | chr1  | 27612064  | 27635277  | 3057  |
| IGKV1D-43  | 1.698868307  | 5.17622E-31 | 1.13209E-29 | UP     | immunoglobulin kappa variable 1D-43 [Source:HGNC Symbol;Acc:HGNC:5758]                             | chr2  | 90209873  | 90210529  | 532   |
| MSR1       | 0.802261031  | 6.18141E-31 | 1.34868E-29 | UP     | macrophage scavenger receptor 1 [Source:HGNC Symbol;Acc:HGNC:7376]                                 | chr8  | 16107878  | 16192791  | 5602  |
| LY96       | 0.81315842   | 7.07897E-31 | 1.5408E-29  | UP     | lymphocyte antigen 96 [Source:HGNC Symbol;Acc:HGNC:17156]                                          | chr8  | 73991352  | 74029087  | 607   |
| TNFRSF13B  | 1.462931655  | 7.85564E-31 | 1.7078E-29  | UP     | TNF receptor superfamily member 13B [Source:HGNC Symbol;Acc:HGNC:18153]                            | chr17 | 16933065  | 16972118  | 1499  |
| NAPS5      | 1.083780504  | 8.45346E-31 | 1.83337E-29 | UP     | napsin B aspartic peptidase, pseudogene [Source:HGNC Symbol;Acc:HGNC:13396]                        | chr19 | 50333796  | 50344767  | 1707  |
| IGHV3-72   | 1.912937283  | 8.47081E-31 | 1.83494E-29 | UP     | immunoglobulin heavy variable 3-72 [Source:HGNC Symbol;Acc:HGNC:5622]                              | chr14 | 106790691 | 106790993 | 303   |
| SGK1       | 0.74182251   | 8.98453E-31 | 1.9439E-29  | UP     | serum/glucocorticoid regulated kinase 1 [Source:HGNC Symbol;Acc:HGNC:10810]                        | chr6  | 134169246 | 134318058 | 6342  |
| DRAM1      | 0.652683847  | 9.47452E-31 | 2.04747E-29 | UP     | DNA damage regulated autophagy modulator 1 [Source:HGNC Symbol;Acc:HGNC:25645]                     | chr12 | 101877351 | 101923623 | 3519  |
| SIGLEC9    | 0.755781604  | 1.0887E-30  | 2.33877E-29 | UP     | sialic acid binding Ig like lectin 9 [Source:HGNC Symbol;Acc:HGNC:10878]                           | chr19 | 51124908  | 51136651  | 2380  |
| HMGCS2     | -2.376981785 | 1.18972E-30 | 2.55276E-29 | DOWN   | 3-hydroxy-3-methylglutaryl-CoA synthase 2 [Source:HGNC Symbol;Acc:HGNC:5008]                       | chr1  | 119747996 | 119768905 | 2439  |
| CD19       | 1.627691088  | 1.31739E-30 | 2.82336E-29 | UP     | CD19 molecule [Source:HGNC Symbol;Acc:HGNC:1633]                                                   | chr16 | 28931939  | 28939346  | 1957  |
| FCGR1CP    | 1.286144773  | 1.48322E-30 | 3.16752E-29 | UP     | Fc fragment of IgG receptor 1c, pseudogene [Source:HGNC Symbol;Acc:HGNC:3615]                      | chr1  | 143874793 | 143883575 | 1127  |
| APOBEC3D   | 0.809430786  | 1.69442E-30 | 3.6143E-29  | UP     | apolipoprotein B mRNA editing enzyme catalytic subunit 3D [Source:HGNC Symbol;Acc:HGNC:17354]      | chr22 | 39021113  | 39033276  | 2528  |
| FUT7       | 1.164458692  | 2.03655E-30 | 4.33899E-29 | UP     | fucosyltransferase 7 [Source:HGNC Symbol;Acc:HGNC:4018]                                            | chr9  | 137030174 | 137033010 | 2584  |
| MS4A1      | 1.75037456   | 2.58637E-30 | 5.49747E-29 | UP     | membrane spanning 4-domains A1 [Source:HGNC Symbol;Acc:HGNC:7315]                                  | chr11 | 60455809  | 60470760  | 3517  |
| GGTA1P     | 0.871818019  | 3.65113E-30 | 7.74254E-29 | UP     | glycoprotein, alpha-galactosyltransferase 1 pseudogene [Source:HGNC Symbol;Acc:HGNC:4253]          | chr9  | 121444991 | 121500027 | 4501  |
| GPR82      | 1.08201841   | 3.90108E-30 | 8.2629E-29  | UP     | G protein-coupled receptor 82 [Source:HGNC Symbol;Acc:HGNC:4533]                                   | chrX  | 41724155  | 41730135  | 3349  |

| PARAM      | logFC        | pval        | pval.adj    | UPDOWN | desc                                                                                                                     | chr   | start     | end       | size  |
|------------|--------------|-------------|-------------|--------|--------------------------------------------------------------------------------------------------------------------------|-------|-----------|-----------|-------|
| SELL       | 0.993919567  | 4.29766E-30 | 9.09228E-29 | UP     | selectin L [Source:HGNC Symbol;Acc:HGNC:10720]                                                                           | chr1  | 169960667 | 169711698 | 2436  |
| CELF2      | 0.73282587   | 4.46355E-30 | 9.43223E-29 | UP     | CUGBP Elav-like family member 2 [Source:HGNC Symbol;Acc:HGNC:2550]                                                       | chr10 | 10798397  | 11336675  | 10459 |
| CPVL       | 0.745875458  | 4.58833E-30 | 9.68464E-29 | UP     | carboxypeptidase, vitellogenin like [Source:HGNC Symbol;Acc:HGNC:14399]                                                  | chr7  | 28995231  | 29195276  | 2816  |
| NLRP3      | 0.783480672  | 4.94799E-30 | 1.04316E-28 | UP     | NLR family pyrin domain containing 3 [Source:HGNC Symbol;Acc:HGNC:16400]                                                 | chr1  | 247416156 | 247449108 | 4499  |
| IKZF3      | 0.832884182  | 5.21459E-30 | 1.09691E-28 | UP     | IKAROS family zinc finger 3 [Source:HGNC Symbol;Acc:HGNC:13178]                                                          | chr17 | 39757715  | 39864188  | 10008 |
| ADCY7      | 0.622487507  | 5.21502E-30 | 1.09691E-28 | UP     | adenylate cyclase 7 [Source:HGNC Symbol;Acc:HGNC:238]                                                                    | chr16 | 50266516  | 50318135  | 6284  |
| GAREM1     | -0.775882424 | 5.62265E-30 | 1.18128E-28 | DOWN   | GRB2 associated regulator of MAPK1 subtype 1 [Source:HGNC Symbol;Acc:HGNC:26136]                                         | chr18 | 32263522  | 32470484  | 7036  |
| PTPRR      | -1.897941958 | 5.76297E-30 | 1.20936E-28 | DOWN   | protein tyrosine phosphatase, receptor type R [Source:HGNC Symbol;Acc:HGNC:9680]                                         | chr12 | 70638073  | 70920843  | 4163  |
| MILR1      | 0.799249803  | 6.08437E-30 | 1.27533E-28 | UP     | mast cell immunoglobulin like receptor 1 [Source:HGNC Symbol;Acc:HGNC:27570]                                             | chr17 | 64449037  | 64468642  | 1529  |
| CXCR4      | 0.787256297  | 6.12912E-30 | 1.28322E-28 | UP     | C-X-C motif chemokine receptor 4 [Source:HGNC Symbol;Acc:HGNC:2561]                                                      | chr2  | 136114349 | 136118165 | 2015  |
| CAB39L     | -0.760300649 | 7.29038E-30 | 1.52459E-28 | DOWN   | calcium binding protein 39 like [Source:HGNC Symbol;Acc:HGNC:20290]                                                      | chr13 | 49308650  | 49444126  | 4295  |
| MSX2       | -1.223317936 | 7.67256E-30 | 1.60266E-28 | DOWN   | msh homeobox 2 [Source:HGNC Symbol;Acc:HGNC:7392]                                                                        | chr5  | 174724533 | 174730893 | 2270  |
| POU2F2     | 0.756129319  | 8.15335E-30 | 1.69918E-28 | UP     | POU class 2 homeobox 2 [Source:HGNC Symbol;Acc:HGNC:9213]                                                                | chr19 | 42086110  | 42132478  | 7320  |
| KLRG1      | 0.889804817  | 8.29055E-30 | 1.72579E-28 | UP     | killer cell lectin like receptor G1 [Source:HGNC Symbol;Acc:HGNC:6380]                                                   | chr12 | 8989541   | 9010760   | 1888  |
| MPP1       | 0.611890987  | 8.36676E-30 | 1.73965E-28 | UP     | membrane palmitoylated protein 1 [Source:HGNC Symbol;Acc:HGNC:7219]                                                      | chrX  | 154778684 | 154805527 | 2197  |
| CTSL       | 0.634205297  | 9.68221E-30 | 2.01086E-28 | UP     | cathepsin L [Source:HGNC Symbol;Acc:HGNC:2537]                                                                           | chr9  | 87725519  | 87731392  | 2365  |
| CLEC10A    | 1.109354119  | 9.85564E-30 | 2.04454E-28 | UP     | C-type lectin domain containing 10A [Source:HGNC Symbol;Acc:HGNC:16916]                                                  | chr17 | 7074537   | 7080307   | 2207  |
| CLEC12A    | 1.070695809  | 1.08532E-29 | 2.24891E-28 | UP     | C-type lectin domain family 12 member A [Source:HGNC Symbol;Acc:HGNC:31713]                                              | chr12 | 9951316   | 9985595   | 2302  |
| IGHV4-55   | 1.505981759  | 1.1134E-29  | 2.30446E-28 | UP     | immunoglobulin heavy variable 4-55 (pseudogene) [Source:HGNC Symbol;Acc:HGNC:5653]                                       | chr14 | 106606101 | 106606551 | 368   |
| CLNK       | 1.103826461  | 1.24349E-29 | 2.57078E-28 | UP     | cytokine dependent hematopoietic cell linker [Source:HGNC Symbol;Acc:HGNC:17438]                                         | chr4  | 10486395  | 10684865  | 6206  |
| CLEC4D     | 1.121989177  | 1.32415E-29 | 2.73442E-28 | UP     | C-type lectin domain family 4 member D [Source:HGNC Symbol;Acc:HGNC:14554]                                               | chr12 | 8513540   | 8522366   | 1936  |
| IGKV1D-17  | 1.853817831  | 1.47245E-29 | 3.0372E-28  | UP     | immunoglobulin kappa variable 1D-17 [Source:HGNC Symbol;Acc:HGNC:15549]                                                  | chr2  | 90082635  | 90083291  | 532   |
| OAS3       | 0.650405649  | 1.50869E-29 | 3.10842E-28 | UP     | 2'-5'-oligoadenylate synthetase 3 [Source:HGNC Symbol;Acc:HGNC:8088]                                                     | chr12 | 112938352 | 112973249 | 7855  |
| KRTAP5-9   | -1.460718045 | 1.59198E-29 | 3.27258E-28 | DOWN   | keratin associated protein 5-9 [Source:HGNC Symbol;Acc:HGNC:23604]                                                       | chr11 | 71548418  | 71549553  | 1136  |
| AC061975.7 | -1.313373692 | 1.79713E-29 | 3.69012E-28 | DOWN   |                                                                                                                          | chr17 | 28232590  | 28235281  | 2692  |
| RG518      | 0.815316091  | 2.041E-29   | 4.1814E-28  | UP     | regulator of G protein signaling 18 [Source:HGNC Symbol;Acc:HGNC:14261]                                                  | chr1  | 192158457 | 192185815 | 2150  |
| LILRA5     | 1.051480276  | 2.06496E-29 | 4.2257E-28  | UP     | leukocyte immunoglobulin like receptor A5 [Source:HGNC Symbol;Acc:HGNC:16309]                                            | chr19 | 54307070  | 54313139  | 1363  |
| VSIG4      | 0.891312223  | 2.35725E-29 | 4.80756E-28 | UP     | V-set and immunoglobulin domain containing 4 [Source:HGNC Symbol;Acc:HGNC:17032]                                         | chrX  | 66021738  | 66040125  | 2192  |
| KIR2DS4    | 1.454088833  | 2.50079E-29 | 5.09458E-28 | UP     | killer cell immunoglobulin like receptor, two Ig domains and short cytoplasmic tail 4 [Source:HGNC Symbol;Acc:HGNC:6336] | chr19 | 54832776  | 54848569  | 1608  |
| IGHV3-64   | 1.982497131  | 2.89329E-29 | 5.88756E-28 | UP     | immunoglobulin heavy variable 3-64 [Source:HGNC Symbol;Acc:HGNC:5617]                                                    | chr14 | 106652675 | 106658258 | 431   |
| RNF128     | -1.45379637  | 3.15317E-29 | 6.4092E-28  | DOWN   | ring finger protein 128, E3 ubiquitin protein ligase [Source:HGNC Symbol;Acc:HGNC:21153]                                 | chrX  | 106693838 | 106796993 | 3388  |
| SLC8A1     | 0.6620371    | 3.18796E-29 | 6.47267E-28 | UP     | solute carrier family 8 member A1 [Source:HGNC Symbol;Acc:HGNC:11068]                                                    | chr2  | 40097270  | 40611053  | 21410 |
| HCLS1      | 0.678968056  | 3.61007E-29 | 7.3215E-28  | UP     | hematopoietic cell-specific Lyn substrate 1 [Source:HGNC Symbol;Acc:HGNC:4844]                                           | chr3  | 121631399 | 121660911 | 2000  |
| TM6SF1     | 0.642111991  | 4.32763E-29 | 8.74742E-28 | UP     | transmembrane 6 superfamily member 1 [Source:HGNC Symbol;Acc:HGNC:11860]                                                 | chr15 | 83107407  | 83137408  | 2123  |
| UPK3A      | -1.894800288 | 1.10349E-28 | 2.22057E-27 | DOWN   | uroplakin 3A [Source:HGNC Symbol;Acc:HGNC:12580]                                                                         | chr22 | 45284982  | 45295874  | 1051  |
| TM7SF2     | -0.716100155 | 1.1667E-28  | 2.34517E-27 | DOWN   | transmembrane 7 superfamily member 2 [Source:HGNC Symbol;Acc:HGNC:11863]                                                 | chr11 | 65111854  | 65116356  | 1722  |
| TNF        | 1.04352146   | 1.17854E-28 | 2.36635E-27 | UP     | tumor necrosis factor [Source:HGNC Symbol;Acc:HGNC:11892]                                                                | chr6  | 31575567  | 31578336  | 1676  |
| DACH2      | -1.487225381 | 1.20633E-28 | 2.41946E-27 | DOWN   | dachshund family transcription factor 2 [Source:HGNC Symbol;Acc:HGNC:16814]                                              | chrX  | 86148458  | 86832602  | 2512  |
| ERAP2      | 0.857114187  | 1.45453E-28 | 2.91404E-27 | UP     | endoplasmic reticulum aminopeptidase 2 [Source:HGNC Symbol;Acc:HGNC:29499]                                               | chr5  | 96875939  | 96919716  | 5888  |
| ENTPD3     | -1.372702786 | 1.47799E-28 | 2.95777E-27 | DOWN   | ectonucleoside triphosphate diphosphohydrolase 3 [Source:HGNC Symbol;Acc:HGNC:3365]                                      | chr3  | 40387156  | 40428619  | 3242  |
| ARNTL2     | 0.849143988  | 1.71069E-28 | 3.41215E-27 | UP     | aryl hydrocarbon receptor nuclear translocator like 2 [Source:HGNC Symbol;Acc:HGNC:18984]                                | chr12 | 27332854  | 27425289  | 6920  |
| OR7E91P    | -1.216669293 | 1.961E-28   | 3.90284E-27 | DOWN   | olfactory receptor family 7 subfamily E member 91 pseudogene [Source:HGNC Symbol;Acc:HGNC:14747]                         | chr2  | 71024127  | 71029893  | 1198  |
| AL671883.3 | 1.237928846  | 2.23107E-28 | 4.43061E-27 | UP     |                                                                                                                          | chr6  | 31356647  | 31357637  | 991   |
| SMAD6      | -0.824665826 | 2.24226E-28 | 4.44796E-27 | DOWN   | SMAD family member 6 [Source:HGNC Symbol;Acc:HGNC:6772]                                                                  | chr15 | 66702228  | 66782848  | 3835  |
| SAMD13     | -1.07320715  | 2.34414E-28 | 4.64498E-27 | DOWN   | sterile alpha motif domain containing 13 [Source:HGNC Symbol;Acc:HGNC:24582]                                             | chr1  | 84298366  | 84350798  | 2171  |
| TLR3       | 0.7493501    | 2.51105E-28 | 4.97028E-27 | UP     | toll like receptor 3 [Source:HGNC Symbol;Acc:HGNC:11849]                                                                 | chr4  | 186069152 | 18608069  | 6227  |
| ARHGAP4    | 0.663551134  | 2.5467E-28  | 5.03535E-27 | UP     | Rho GTPase activating protein 4 [Source:HGNC Symbol;Acc:HGNC:674]                                                        | chrX  | 153907367 | 153926260 | 3381  |
| RIPOR2     | 0.848722222  | 2.82933E-28 | 5.58809E-27 | UP     | RHO family interacting cell polarization regulator 2 [Source:HGNC Symbol;Acc:HGNC:13872]                                 | chr6  | 24804282  | 25042018  | 7689  |
| FAM84A     | -1.162476461 | 2.96725E-28 | 5.85411E-27 | DOWN   | family with sequence similarity 84 member A [Source:HGNC Symbol;Acc:HGNC:20743]                                          | chr2  | 14632686  | 14640046  | 6598  |
| FKBP5      | 0.778423889  | 3.13901E-28 | 6.18625E-27 | UP     | FK506 binding protein 5 [Source:HGNC Symbol;Acc:HGNC:3721]                                                               | chr6  | 35753585  | 35728583  | 10628 |
| FRY        | -0.693134939 | 3.72049E-28 | 7.30836E-27 | DOWN   | FRY microtubule binding protein [Source:HGNC Symbol;Acc:HGNC:20367]                                                      | chr13 | 32031300  | 32299122  | 13209 |
| IPCEF1     | 0.770384776  | 4.50862E-28 | 8.82783E-27 | UP     | interaction protein for cytohesin exchange factors 1 [Source:HGNC Symbol;Acc:HGNC:21204]                                 | chr6  | 154154609 | 154356766 | 7021  |
| APOBEC3A   | 1.261569831  | 4.58239E-28 | 8.9626E-27  | UP     | apolipoprotein B mRNA editing enzyme catalytic subunit 3A [Source:HGNC Symbol;Acc:HGNC:17343]                            | chr22 | 38952751  | 38992778  | 1892  |
| MSN        | 0.593607631  | 4.92631E-28 | 9.62488E-27 | UP     | moesin [Source:HGNC Symbol;Acc:HGNC:7373]                                                                                | chrX  | 65667670  | 65741931  | 3944  |
| NELL2      | 1.102495063  | 6.12312E-28 | 1.19503E-26 | UP     | neural EGFL like 2 [Source:HGNC Symbol;Acc:HGNC:7751]                                                                    | chr12 | 44508275  | 44913928  | 4461  |
| SOD2       | 0.67072743   | 6.61644E-28 | 1.28992E-26 | UP     | superoxide dismutase 2 [Source:HGNC Symbol;Acc:HGNC:11180]                                                               | chr6  | 159669057 | 159762529 | 17721 |
| SLC9A9     | 0.634074314  | 6.85279E-28 | 1.33313E-26 | UP     | solute carrier family 9 member A9 [Source:HGNC Symbol;Acc:HGNC:20653]                                                    | chr3  | 143265222 | 143848531 | 3627  |

| PARAM      | logFC        | pval        | pval.adj    | UPDOWN | desc                                                                                                 | chr   | start     | end       | size   |
|------------|--------------|-------------|-------------|--------|------------------------------------------------------------------------------------------------------|-------|-----------|-----------|--------|
| AP1S2      | 0.61514179   | 7.32682E-28 | 1.42382E-26 | UP     | adaptor related protein complex 1 sigma 2 subunit [Source:HGNC Symbol;Acc:HGNC:560]                  | chrX  | 15825806  | 15854931  | 5195   |
| HTRA4      | 0.978303825  | 7.35441E-28 | 1.42765E-26 | UP     | HtraA serine peptidase 4 [Source:HGNC Symbol;Acc:HGNC:26909]                                         | chr8  | 38974164  | 38988662  | 2095   |
| TOX        | 0.934118925  | 7.70556E-28 | 1.49262E-26 | UP     | thymocyte selection associated high mobility group box [Source:HGNC Symbol;Acc:HGNC:18988]           | chr8  | 58805418  | 59119208  | 4131   |
| MAFB       | 0.621614244  | 7.73463E-28 | 1.49665E-26 | UP     | MAF bZIP transcription factor B [Source:HGNC Symbol;Acc:HGNC:6408]                                   | chr20 | 40685848  | 40689240  | 3393   |
| BCAS1      | -1.729778909 | 8.04408E-28 | 1.55488E-26 | DOWN   | breast carcinoma amplified sequence 1 [Source:HGNC Symbol;Acc:HGNC:974]                              | chr20 | 53943541  | 54070594  | 3303   |
| HLA-H      | 0.740361798  | 8.40777E-28 | 1.62344E-26 | UP     | major histocompatibility complex, class I, H (pseudogene) [Source:HGNC Symbol;Acc:HGNC:4965]         | chr6  | 29887752  | 29890482  | 1096   |
| SPATC1     | 1.027586084  | 1.16173E-27 | 2.23865E-26 | UP     | spermatogenesis and centriole associated 1 [Source:HGNC Symbol;Acc:HGNC:30510]                       | chr8  | 144012414 | 144047085 | 2007   |
| MS4A7      | 0.676482685  | 1.16186E-27 | 2.23865E-26 | UP     | membrane spanning 4-domains A7 [Source:HGNC Symbol;Acc:HGNC:13378]                                   | chr11 | 60378482  | 60395951  | 3009   |
| PSCA       | -1.862311868 | 1.22036E-27 | 2.34888E-26 | DOWN   | prostate stem cell antigen [Source:HGNC Symbol;Acc:HGNC:9500]                                        | chr8  | 142680456 | 142682724 | 1356   |
| MYZAP      | -1.029922452 | 1.2464E-27  | 2.39644E-26 | DOWN   | myocardial zonula adherens protein [Source:HGNC Symbol;Acc:HGNC:43444]                               | chr15 | 57591941  | 57685364  | 2361   |
| IL10       | 1.017448605  | 1.25294E-27 | 2.40647E-26 | UP     | interleukin 10 [Source:HGNC Symbol;Acc:HGNC:5962]                                                    | chr1  | 206767602 | 206772494 | 1630   |
| LILRA6     | 1.004013226  | 2.21778E-27 | 4.25059E-26 | UP     | leukocyte immunoglobulin like receptor A6 [Source:HGNC Symbol;Acc:HGNC:15495]                        | chr19 | 54238549  | 54242791  | 1890   |
| AC245369.1 | 1.696852269  | 2.36262E-27 | 4.52341E-26 | UP     |                                                                                                      | chr14 | 106723574 | 106724093 | 434    |
| DNAH8      | 1.188492332  | 2.37495E-27 | 4.54221E-26 | UP     | dynein axonemal heavy chain 8 [Source:HGNC Symbol;Acc:HGNC:2952]                                     | chr6  | 38715341  | 39030529  | 14785  |
| SLCO2B1    | 0.650543207  | 2.77184E-27 | 5.29013E-26 | UP     | solute carrier organic anion transporter family member 2B1 [Source:HGNC Symbol;Acc:HGNC:10962]       | chr11 | 75150987  | 75206549  | 4611   |
| ALG45931.1 | 0.995662324  | 2.82425E-27 | 5.38449E-26 | UP     |                                                                                                      | chr6  | 33079451  | 33079860  | 410    |
| SUTRK6     | -1.6741301   | 3.00194E-27 | 5.71725E-26 | DOWN   | SLIT and NTRK like family member 6 [Source:HGNC Symbol;Acc:HGNC:23503]                               | chr13 | 85792790  | 85799488  | 4318   |
| AC004687.1 | 1.077339094  | 3.17272E-27 | 6.03616E-26 | UP     |                                                                                                      | chr17 | 58330884  | 58332508  | 1625   |
| BAIAP3     | -1.014004688 | 3.51582E-27 | 6.68189E-26 | DOWN   | BAI1 associated protein 3 [Source:HGNC Symbol;Acc:HGNC:948]                                          | chr16 | 1333601   | 1349441   | 5084   |
| EPB41L1    | -0.595659496 | 4.54325E-27 | 8.62552E-26 | DOWN   | erythrocyte membrane protein band 4.1 like 1 [Source:HGNC Symbol;Acc:HGNC:3378]                      | chr20 | 36091504  | 36232799  | 6903   |
| SERPING1   | 0.763030504  | 5.45011E-27 | 1.03256E-25 | UP     | serpin family G member 1 [Source:HGNC Symbol;Acc:HGNC:1228]                                          | chr11 | 57597518  | 57614853  | 2490   |
| HS3ST5     | -1.546054489 | 5.57781E-27 | 1.05565E-25 | DOWN   | heparan sulfate-glucosamine 3-sulfotransferase 5 [Source:HGNC Symbol;Acc:HGNC:19419]                 | chr6  | 114055586 | 114343045 | 3901   |
| ATP8B1     | -0.695979327 | 5.92861E-27 | 1.1197E-25  | DOWN   | ATPase phospholipid transporting 8B1 [Source:HGNC Symbol;Acc:HGNC:3706]                              | chr18 | 57646426  | 57731807  | 5818   |
| CAPN5      | -0.882643831 | 7.66519E-27 | 1.44168E-25 | DOWN   | calpain 5 [Source:HGNC Symbol;Acc:HGNC:1482]                                                         | chr11 | 77066932  | 77126155  | 4599   |
| AC012236.1 | 1.303085381  | 7.97056E-27 | 1.49756E-25 | UP     |                                                                                                      | chr15 | 31221999  | 31230838  | 1537   |
| KRTAP5-10  | -1.32868919  | 8.50303E-27 | 1.59595E-25 | DOWN   | keratin associated protein 5-10 [Source:HGNC Symbol;Acc:HGNC:23605]                                  | chr11 | 71565567  | 71566738  | 1176   |
| ASS1P1     | 0.953972015  | 8.7398E-27  | 1.63869E-25 | UP     | argininosuccinate synthetase 1 pseudogene 1 [Source:HGNC Symbol;Acc:HGNC:759]                        | chr6  | 25023247  | 25024483  | 1237   |
| AC091492.1 | -1.14912379  | 8.82455E-27 | 1.65287E-25 | DOWN   |                                                                                                      | chr3  | 12328003  | 12328274  | 272    |
| S100A8     | 1.633880121  | 1.06942E-26 | 1.99893E-25 | UP     | S100 calcium binding protein A8 [Source:HGNC Symbol;Acc:HGNC:10498]                                  | chr1  | 153390032 | 153391188 | 643    |
| SLC14A1    | -1.543043184 | 1.1053E-26  | 2.06387E-25 | DOWN   | solute carrier family 14 member 1 (Kid blood group) [Source:HGNC Symbol;Acc:HGNC:10918]              | chr18 | 45724127  | 45752520  | 5936   |
| C10orf99   | -1.990816715 | 1.12399E-26 | 2.09445E-25 | DOWN   | chromosome 10 open reading frame 99 [Source:HGNC Symbol;Acc:HGNC:31428]                              | chr10 | 84173738  | 84185294  | 888    |
| CD209      | 0.821386534  | 1.27103E-26 | 2.36602E-25 | UP     | CD209 molecule [Source:HGNC Symbol;Acc:HGNC:1641]                                                    | chr19 | 7739994   | 7747564   | 4413   |
| FCGR2B     | 0.910729868  | 1.32247E-26 | 2.45925E-25 | UP     | Fc fragment of IgG receptor IIb [Source:HGNC Symbol;Acc:HGNC:3618]                                   | chr1  | 161663147 | 161678654 | 2129   |
| MCF2L      | -0.647982515 | 1.3375E-26  | 2.48466E-25 | DOWN   | MCF.2 cell line derived transforming sequence like [Source:HGNC Symbol;Acc:HGNC:14576]               | chr13 | 112894378 | 113099739 | 10127  |
| IGF2       | -1.691434716 | 1.61543E-26 | 2.99789E-25 | DOWN   | insulin like growth factor 2 [Source:HGNC Symbol;Acc:HGNC:5466]                                      | chr11 | 2129112   | 2141238   | 6259   |
| SLC2A10    | -0.743282581 | 1.78006E-26 | 3.30002E-25 | DOWN   | solute carrier family 2 member 10 [Source:HGNC Symbol;Acc:HGNC:13444]                                | chr20 | 46709487  | 46736347  | 4844   |
| OR5B21     | 0.968990106  | 2.89013E-26 | 5.33072E-25 | UP     | olfactory receptor family 5 subfamily B member 21 [Source:HGNC Symbol;Acc:HGNC:19616]                | chr11 | 58507175  | 58508105  | 931    |
| TTN        | 1.122436276  | 3.32851E-26 | 6.13305E-25 | UP     | titin [Source:HGNC Symbol;Acc:HGNC:12403]                                                            | chr2  | 178525989 | 178807423 | 116859 |
| IGHV1-45   | 1.686289356  | 3.73628E-26 | 6.87741E-25 | UP     | immunoglobulin heavy variable 1-45 [Source:HGNC Symbol;Acc:HGNC:5553]                                | chr14 | 106506996 | 106507491 | 411    |
| PLCE1      | -0.818514275 | 3.93739E-26 | 7.24024E-25 | DOWN   | phospholipase C epsilon 1 [Source:HGNC Symbol;Acc:HGNC:17175]                                        | chr10 | 94030812  | 94332823  | 12880  |
| TLR2       | 0.728222662  | 8.04034E-26 | 1.46955E-24 | UP     | toll like receptor 2 [Source:HGNC Symbol;Acc:HGNC:11848]                                             | chr4  | 153701500 | 153705699 | 4200   |
| GRIN3A     | 1.271300058  | 8.51042E-26 | 1.55234E-24 | UP     | glutamate ionotropic receptor NMDA type subunit 3A [Source:HGNC Symbol;Acc:HGNC:16767]               | chr9  | 101569353 | 101738580 | 7770   |
| IGKV2D-24  | 1.359194211  | 8.67331E-26 | 1.58046E-24 | UP     | immunoglobulin kappa variable 2D-24 (non-functional) [Source:HGNC Symbol;Acc:HGNC:5797]              | chr2  | 90004797  | 90005629  | 390    |
| ISG15      | 0.78579031   | 9.76816E-26 | 1.77818E-24 | UP     | ISG15 ubiquitin-like modifier [Source:HGNC Symbol;Acc:HGNC:4053]                                     | chr1  | 1001138   | 1014541   | 942    |
| GOLT1A     | -1.335547533 | 9.92925E-26 | 1.80569E-24 | DOWN   | golgi transport 1A [Source:HGNC Symbol;Acc:HGNC:24766]                                               | chr1  | 204198160 | 204214092 | 883    |
| ARFGEF3    | -0.916002539 | 1.01778E-25 | 1.84904E-24 | DOWN   | ARFGEF family member 3 [Source:HGNC Symbol;Acc:HGNC:21213]                                           | chr6  | 138161921 | 138344663 | 14877  |
| ITPR1P1    | 0.792187456  | 1.039E-25   | 1.8857E-24  | UP     | inositol 1,4,5-trisphosphate receptor interacting protein-like 1 [Source:HGNC Symbol;Acc:HGNC:29371] | chr2  | 96325331  | 96330517  | 4633   |
| HSD17B2    | -1.468217369 | 1.16996E-25 | 2.11913E-24 | DOWN   | hydroxysteroid 17-beta dehydrogenase 2 [Source:HGNC Symbol;Acc:HGNC:5211]                            | chr16 | 82035232  | 82098534  | 1455   |
| AC247036.6 | 2.277639895  | 1.28158E-25 | 2.31676E-24 | UP     | Immunoglobulin heavy variable 5-10-1 [Source:UniProtKB/Swiss-Prot;Acc:A0A0J9YXX1]                    | chr14 | 106107972 | 106108464 | 410    |
| IGKV2-29   | 1.816079838  | 1.28162E-25 | 2.31676E-24 | UP     | immunoglobulin kappa variable 2-29 (gene/pseudogene) [Source:HGNC Symbol;Acc:HGNC:5784]              | chr2  | 89234174  | 89234912  | 372    |
| ZNF321P    | -0.807238906 | 1.41727E-25 | 2.55942E-24 | DOWN   | zinc finger protein 321, pseudogene [Source:HGNC Symbol;Acc:HGNC:13827]                              | chr19 | 52927135  | 52942601  | 2341   |
| HSPA7      | 0.889114203  | 1.51736E-25 | 2.73471E-24 | UP     | heat shock protein family A (Hsp70) member 7 [Source:HGNC Symbol;Acc:HGNC:5240]                      | chr1  | 161608291 | 161608217 | 1927   |
| SORL1      | -0.728465798 | 1.59434E-25 | 2.87061E-24 | DOWN   | sortilin related receptor 1 [Source:HGNC Symbol;Acc:HGNC:11185]                                      | chr11 | 121452203 | 121633693 | 11881  |
| CLEC4C     | 1.21615843   | 1.62436E-25 | 2.92176E-24 | UP     | C-type lectin domain family 4 member C [Source:HGNC Symbol;Acc:HGNC:13258]                           | chr12 | 7729415   | 7751605   | 1534   |
| KRTAP5-7   | -1.308650876 | 1.70164E-25 | 3.0547E-24  | DOWN   | keratin associated protein 5-7 [Source:HGNC Symbol;Acc:HGNC:23602]                                   | chr11 | 71527267  | 71528674  | 1408   |
| SYTL5      | -1.406765244 | 1.70649E-25 | 3.06037E-24 | DOWN   | synaptotagmin like 5 [Source:HGNC Symbol;Acc:HGNC:15589]                                             | chrX  | 38006582  | 38128819  | 4791   |
| ITM2A      | 0.803013597  | 1.73068E-25 | 3.10069E-24 | UP     | integral membrane protein 2A [Source:HGNC Symbol;Acc:HGNC:6173]                                      | chrX  | 79360384  | 79367552  | 1834   |



| PARAM     | logFC        | pval        | pval.adj    | UPDOWN | desc                                                                                               | chr   | start     | end       | size  |
|-----------|--------------|-------------|-------------|--------|----------------------------------------------------------------------------------------------------|-------|-----------|-----------|-------|
| IL7       | 0.773460259  | 1.81951E-25 | 3.25662E-24 | UP     | interleukin 7 [Source:HGNC Symbol;Acc:HGNC:6023]                                                   | chr8  | 78732772  | 78805523  | 2142  |
| ALOX5AP   | 0.78640654   | 1.96085E-25 | 3.50267E-24 | UP     | arachidonate 5-lipoxygenase activating protein [Source:HGNC Symbol;Acc:HGNC:436]                   | chr13 | 30713478  | 30764426  | 1268  |
| SCUBE2    | -1.144106414 | 2.31189E-25 | 4.12161E-24 | DOWN   | signal peptide, CUB domain and EGF like domain containing 2 [Source:HGNC Symbol;Acc:HGNC:30425]    | chr11 | 9020391   | 9091601   | 3814  |
| RBBPNL    | -1.182320343 | 2.32446E-25 | 4.13996E-24 | DOWN   | RBBPN N-terminal like [Source:HGNC Symbol;Acc:HGNC:16144]                                          | chr20 | 62410237  | 62427533  | 2793  |
| TMEM178A  | -0.889217146 | 2.39597E-25 | 4.26313E-24 | DOWN   | transmembrane protein 178A [Source:HGNC Symbol;Acc:HGNC:28517]                                     | chr2  | 39665919  | 39717963  | 1662  |
| CYP2J2    | -1.120888842 | 2.52617E-25 | 4.48599E-24 | DOWN   | cytochrome P450 family 2 subfamily J member 2 [Source:HGNC Symbol;Acc:HGNC:2634]                   | chr1  | 59893308  | 59926790  | 1896  |
| IGKV1D-27 | 1.354308933  | 2.78591E-25 | 4.9424E-24  | UP     | immunoglobulin kappa variable 1D-27 (pseudogene) [Source:HGNC Symbol;Acc:HGNC:5751]                | chr2  | 89968867  | 89969335  | 335   |
| GPRC5C    | -0.89967474  | 2.81907E-25 | 4.99634E-24 | DOWN   | G protein-coupled receptor class C group 5 member C [Source:HGNC Symbol;Acc:HGNC:13309]            | chr17 | 74430913  | 74447429  | 3049  |
| C11orf21  | 1.030187407  | 2.92918E-25 | 5.18642E-24 | UP     | chromosome 11 open reading frame 21 [Source:HGNC Symbol;Acc:HGNC:13231]                            | chr11 | 2295645   | 2302060   | 2956  |
| GPSM3     | 0.619757178  | 3.20292E-25 | 5.66558E-24 | UP     | G protein signaling modulator 3 [Source:HGNC Symbol;Acc:HGNC:13945]                                | chr6  | 32190766  | 32195523  | 1854  |
| TNFRSF4   | 0.810978139  | 3.20801E-25 | 5.66904E-24 | UP     | TNF receptor superfamily member 4 [Source:HGNC Symbol;Acc:HGNC:11918]                              | chr1  | 1211326   | 1214132   | 1068  |
| IQGAP2    | 0.658676837  | 3.71428E-25 | 6.55093E-24 | UP     | IQ motif containing GTPase activating protein 2 [Source:HGNC Symbol;Acc:HGNC:6111]                 | chr5  | 76403249  | 76708132  | 6023  |
| PLCL2     | 0.599759791  | 3.74984E-25 | 6.60723E-24 | UP     | phospholipase C like 2 [Source:HGNC Symbol;Acc:HGNC:9064]                                          | chr3  | 16884599  | 17090594  | 4349  |
| ANAPC1P1  | 1.017547764  | 4.43683E-25 | 7.80253E-24 | UP     | anaphase promoting complex subunit 1 pseudogene 1 [Source:HGNC Symbol;Acc:HGNC:44150]              | chr2  | 86861825  | 86912978  | 2553  |
| LY8E      | 0.720904098  | 4.92285E-25 | 8.64048E-24 | UP     | lymphocyte antigen 6 family member E [Source:HGNC Symbol;Acc:HGNC:6727]                            | chr8  | 143017982 | 143023832 | 2146  |
| IFITM3    | 0.60723855   | 5.37036E-25 | 9.40773E-24 | UP     | interferon induced transmembrane protein 3 [Source:HGNC Symbol;Acc:HGNC:5414]                      | chr11 | 319669    | 327537    | 1212  |
| TMEM184A  | -1.113297074 | 5.55218E-25 | 9.71685E-24 | DOWN   | transmembrane protein 184A [Source:HGNC Symbol;Acc:HGNC:28797]                                     | chr7  | 1542235   | 1556430   | 6276  |
| ADIRF     | -1.185247669 | 5.61563E-25 | 9.81841E-24 | DOWN   | adipogenesis regulatory factor [Source:HGNC Symbol;Acc:HGNC:24043]                                 | chr10 | 86968192  | 86970915  | 917   |
| CASS4     | 0.670864149  | 6.19869E-25 | 1.08066E-23 | UP     | Cas scaffolding protein family member 4 [Source:HGNC Symbol;Acc:HGNC:15878]                        | chr20 | 56412112  | 56460387  | 4302  |
| ACSM6     | -1.674702395 | 6.36841E-25 | 1.10918E-23 | DOWN   | acyl-CoA synthetase medium chain family member 6 [Source:HGNC Symbol;Acc:HGNC:31665]               | chr10 | 95194200  | 95228928  | 1712  |
| LILRA4    | 1.20302406   | 6.8136E-25  | 1.18444E-23 | UP     | leukocyte immunoglobulin like receptor A4 [Source:HGNC Symbol;Acc:HGNC:15503]                      | chr19 | 54333185  | 54339150  | 1944  |
| SIRPB1    | 0.95954225   | 7.2257E-25  | 1.25488E-23 | UP     | signal regulatory protein beta 1 [Source:HGNC Symbol;Acc:HGNC:15928]                               | chr20 | 1563521   | 1620009   | 5380  |
| THRβ      | -0.808748165 | 7.38754E-25 | 1.28176E-23 | DOWN   | thyroid hormone receptor beta [Source:HGNC Symbol;Acc:HGNC:11799]                                  | chr3  | 24117160  | 24494822  | 8247  |
| ZBED2     | 1.178193039  | 8.3731E-25  | 1.45136E-23 | UP     | zinc finger BED-type containing 2 [Source:HGNC Symbol;Acc:HGNC:20710]                              | chr3  | 111592900 | 111595443 | 2311  |
| EPB41L3   | 0.618532702  | 9.38539E-25 | 1.62373E-23 | UP     | erythrocyte membrane protein band 4.1 like 3 [Source:HGNC Symbol;Acc:HGNC:3380]                    | chr18 | 5392381   | 5628991   | 6090  |
| TBXAS1    | 0.613813032  | 1.04081E-24 | 1.79894E-23 | UP     | thromboxane A synthase 1 [Source:HGNC Symbol;Acc:HGNC:11609]                                       | chr7  | 139778248 | 140020325 | 3560  |
| IL22RA2   | 1.22650399   | 1.12063E-24 | 1.93506E-23 | UP     | interleukin 22 receptor subunit alpha 2 [Source:HGNC Symbol;Acc:HGNC:14901]                        | chr6  | 137143820 | 137173648 | 2897  |
| HMSD      | 1.171549955  | 1.32393E-24 | 2.2796E-23  | UP     | histocompatibility minor serpin domain containing [Source:HGNC Symbol;Acc:HGNC:23037]              | chr18 | 63949301  | 63961834  | 2101  |
| CCDC88B   | 0.654545757  | 1.35716E-24 | 2.33461E-23 | UP     | coiled-coil domain containing 88B [Source:HGNC Symbol;Acc:HGNC:26757]                              | chr11 | 64340223  | 64357534  | 5137  |
| ZNF704    | -0.658964245 | 1.70756E-24 | 2.92626E-23 | DOWN   | zinc finger protein 704 [Source:HGNC Symbol;Acc:HGNC:32291]                                        | chr8  | 80628451  | 80874781  | 14386 |
| WDR64     | 1.04994268   | 1.70976E-24 | 2.92726E-23 | UP     | WD repeat domain 64 [Source:HGNC Symbol;Acc:HGNC:26570]                                            | chr1  | 241652278 | 241802133 | 4375  |
| LIMD2     | 0.586553288  | 1.99637E-24 | 3.41474E-23 | UP     | LIM domain containing 2 [Source:HGNC Symbol;Acc:HGNC:28142]                                        | chr17 | 63695902  | 63700685  | 3709  |
| PLA2G4F   | -1.379410072 | 2.08785E-24 | 3.56448E-23 | DOWN   | phospholipase A2 group IVF [Source:HGNC Symbol;Acc:HGNC:27396]                                     | chr15 | 42139034  | 42156636  | 5587  |
| TMEM150B  | 0.95216968   | 2.16012E-24 | 3.6844E-23  | UP     | transmembrane protein 150B [Source:HGNC Symbol;Acc:HGNC:34415]                                     | chr19 | 55312801  | 55325301  | 943   |
| CHI3L1    | 1.256332165  | 2.57626E-24 | 4.38593E-23 | UP     | chitinase 3 like 1 [Source:HGNC Symbol;Acc:HGNC:1932]                                              | chr1  | 203178931 | 203186749 | 1792  |
| CYP4F22   | -1.603258348 | 2.61214E-24 | 4.44284E-23 | DOWN   | cytochrome P450 family 4 subfamily F member 22 [Source:HGNC Symbol;Acc:HGNC:26820]                 | chr19 | 15508493  | 15552317  | 2644  |
| TRGV4     | 1.360527976  | 2.76438E-24 | 4.69298E-23 | UP     | T-cell receptor gamma variable 4 [Source:HGNC Symbol;Acc:HGNC:12289]                               | chr7  | 38353715  | 38354517  | 688   |
| MMP15     | -0.65550265  | 2.77663E-24 | 4.70937E-23 | DOWN   | matrix metalloproteinase 15 [Source:HGNC Symbol;Acc:HGNC:7161]                                     | chr16 | 58025566  | 58046901  | 4250  |
| AMPD1     | 1.374115042  | 2.887E-24   | 4.89198E-23 | UP     | adenosine monophosphate deaminase 1 [Source:HGNC Symbol;Acc:HGNC:468]                              | chr1  | 114673098 | 114695618 | 2407  |
| JSRP1     | 1.221529971  | 2.97034E-24 | 5.02849E-23 | UP     | junctional sarcoplasmic reticulum protein 1 [Source:HGNC Symbol;Acc:HGNC:24963]                    | chr19 | 2252252   | 2256417   | 1138  |
| IGHD      | 2.006385885  | 3.13882E-24 | 5.30876E-23 | UP     | immunoglobulin heavy constant delta [Source:HGNC Symbol;Acc:HGNC:5480]                             | chr14 | 105838401 | 105845678 | 1155  |
| GPR68     | 0.892529802  | 3.27545E-24 | 5.53468E-23 | UP     | G protein-coupled receptor 68 [Source:HGNC Symbol;Acc:HGNC:4519]                                   | chr14 | 91232302  | 91253925  | 3071  |
| PPP1R3C   | -0.979382652 | 3.53429E-24 | 5.9665E-23  | DOWN   | protein phosphatase 1 regulatory subunit 3C [Source:HGNC Symbol;Acc:HGNC:9293]                     | chr10 | 91628442  | 91633054  | 2524  |
| IGKV6D-21 | 1.386751781  | 3.93218E-24 | 6.62588E-23 | UP     | immunoglobulin kappa variable 6D-21 (non-functional) [Source:HGNC Symbol;Acc:HGNC:5837]            | chr2  | 90021567  | 90022185  | 409   |
| C10orf128 | 0.659210025  | 4.0245E-24  | 6.77513E-23 | UP     | chromosome 10 open reading frame 128 [Source:HGNC Symbol;Acc:HGNC:27274]                           | chr10 | 49154725  | 49188400  | 3300  |
| ADGRE4P   | 0.819736161  | 4.09282E-24 | 6.87737E-23 | UP     | adhesion G protein-coupled receptor E4, pseudogene [Source:HGNC Symbol;Acc:HGNC:19240]             | chr19 | 69525000  | 6997872   | 2810  |
| ST8SIA1   | 0.844017292  | 4.11752E-24 | 6.91169E-23 | UP     | ST8 alpha-N-acetyl-neuraminidase alpha-2,8-sialyltransferase 1 [Source:HGNC Symbol;Acc:HGNC:10869] | chr12 | 22193391  | 22334714  | 10930 |
| IL20RA    | -1.181121607 | 4.12086E-24 | 6.91169E-23 | DOWN   | interleukin 20 receptor subunit alpha [Source:HGNC Symbol;Acc:HGNC:6003]                           | chr6  | 136999971 | 137045180 | 4351  |
| HID1      | -0.873227806 | 4.13821E-24 | 6.93437E-23 | DOWN   | HID1 domain containing [Source:HGNC Symbol;Acc:HGNC:15736]                                         | chr17 | 74950744  | 74972734  | 3271  |
| CHIT1     | 1.610742006  | 4.25084E-24 | 7.10997E-23 | UP     | chitinase 1 [Source:HGNC Symbol;Acc:HGNC:1936]                                                     | chr1  | 203216079 | 203229671 | 2246  |
| IGLV4-60  | 1.524051861  | 4.83315E-24 | 8.07648E-23 | UP     | immunoglobulin lambda variable 4-60 [Source:HGNC Symbol;Acc:HGNC:5920]                             | chr22 | 22162199  | 22162681  | 362   |
| RAP1GAP   | -1.01200431  | 6.32927E-24 | 1.05571E-22 | DOWN   | RAP1 GTPase activating protein [Source:HGNC Symbol;Acc:HGNC:9858]                                  | chr1  | 21596215  | 21669363  | 3984  |
| IRF7      | 0.62871916   | 7.01945E-24 | 1.16868E-22 | UP     | interferon regulatory factor 7 [Source:HGNC Symbol;Acc:HGNC:6122]                                  | chr11 | 612553    | 615999    | 2140  |
| CLL19     | 1.43943413   | 7.49742E-24 | 1.24712E-22 | UP     | C-C motif chemokine ligand 19 [Source:HGNC Symbol;Acc:HGNC:10617]                                  | chr9  | 34689567  | 34691277  | 760   |
| GNG2      | 0.623374756  | 8.1156E-24  | 1.34871E-22 | UP     | G protein subunit gamma 2 [Source:HGNC Symbol;Acc:HGNC:4404]                                       | chr14 | 51826195  | 51969800  | 5185  |
| RHEBL1    | 0.726137123  | 9.05693E-24 | 1.50239E-22 | UP     | Ras homolog enriched in brain like 1 [Source:HGNC Symbol;Acc:HGNC:21166]                           | chr12 | 49064685  | 49070025  | 1210  |
| SH3BGRLL2 | -0.699453775 | 9.68651E-24 | 1.60536E-22 | DOWN   | SH3 domain binding glutamate rich protein like 2 [Source:HGNC Symbol;Acc:HGNC:15567]               | chr6  | 79631283  | 79703659  | 4653  |

| PARAM      | logFC        | pval        | pval.adj    | UPDOWN | desc                                                                                            | chr   | start     | end       | size  |
|------------|--------------|-------------|-------------|--------|-------------------------------------------------------------------------------------------------|-------|-----------|-----------|-------|
| AC098934.1 | -1.035708053 | 1.11503E-23 | 1.84458E-22 | DOWN   |                                                                                                 | chr1  | 202851828 | 202861620 | 2838  |
| SHANK2     | -0.980937118 | 1.1257E-23  | 1.86053E-22 | DOWN   | SH3 and multiple ankyrin repeat domains 2 [Source:HGNC Symbol;Acc:HGNC:14295]                   | chr11 | 70467856  | 71224762  | 12411 |
| IFI6       | 0.887983873  | 1.16046E-23 | 1.91624E-22 | UP     | interferon alpha inducible protein 6 [Source:HGNC Symbol;Acc:HGNC:4054]                         | chr1  | 27666061  | 27672218  | 865   |
| HNRNPA1P7  | -0.826093419 | 1.16977E-23 | 1.92985E-22 | DOWN   | heterogeneous nuclear ribonucleoprotein A1 pseudogene 7 [Source:HGNC Symbol;Acc:HGNC:31015]     | chr18 | 32412214  | 32413176  | 963   |
| SLC9A2     | -1.480582775 | 1.52005E-23 | 2.50546E-22 | DOWN   | solute carrier family 9 member A2 [Source:HGNC Symbol;Acc:HGNC:11072]                           | chr2  | 102619707 | 102711318 | 5410  |
| MYBL1      | 0.625312921  | 1.65882E-23 | 2.72676E-22 | UP     | MYB proto-oncogene like 1 [Source:HGNC Symbol;Acc:HGNC:7547]                                    | chr8  | 66562175  | 66613294  | 5237  |
| ITGAD      | 1.145349321  | 1.8997E-23  | 3.11423E-22 | UP     | integrin subunit alpha D [Source:HGNC Symbol;Acc:HGNC:6146]                                     | chr16 | 31393312  | 31426505  | 3912  |
| BLK        | 1.385460334  | 1.99626E-23 | 3.26662E-22 | UP     | BLK proto-oncogene, Src family tyrosine kinase [Source:HGNC Symbol;Acc:HGNC:1057]               | chr8  | 11494001  | 11564604  | 2606  |
| PLCD1      | -0.610623037 | 2.04647E-23 | 3.34576E-22 | DOWN   | phospholipase C delta 1 [Source:HGNC Symbol;Acc:HGNC:9060]                                      | chr3  | 38007498  | 38029762  | 3220  |
| ZMYND15    | 0.609348504  | 2.05254E-23 | 3.35267E-22 | UP     | zinc finger MYND-type containing 15 [Source:HGNC Symbol;Acc:HGNC:20997]                         | chr17 | 4740015   | 4746119   | 2448  |
| SIRPB2     | 0.749932435  | 2.11209E-23 | 3.44373E-22 | UP     | signal regulatory protein beta 2 [Source:HGNC Symbol;Acc:HGNC:16247]                            | chr20 | 1474591   | 1491481   | 2727  |
| SLC16A6    | 0.674937584  | 2.31758E-23 | 3.76524E-22 | UP     | solute carrier family 16 member 6 [Source:HGNC Symbol;Acc:HGNC:10927]                           | chr17 | 68267026  | 68291266  | 3962  |
| OR56B1     | 1.063461743  | 2.41527E-23 | 3.92044E-22 | UP     | olfactory receptor family 56 subfamily B member 1 [Source:HGNC Symbol;Acc:HGNC:15245]           | chr11 | 5736448   | 5738522   | 2075  |
| NYNRIN     | -0.626459864 | 2.44669E-23 | 3.96788E-22 | DOWN   | NYN domain and retroviral integrase containing [Source:HGNC Symbol;Acc:HGNC:20165]              | chr14 | 24398786  | 24419288  | 7857  |
| TOGARAM2   | 0.850546227  | 2.50129E-23 | 4.04972E-22 | UP     | TOG array regulator of axonemal microtubules 2 [Source:HGNC Symbol;Acc:HGNC:33715]              | chr2  | 28981298  | 29061373  | 12691 |
| ADAM19     | 0.65438426   | 2.5645E-23  | 4.1478E-22  | UP     | ADAM metalloproteinase domain 19 [Source:HGNC Symbol;Acc:HGNC:197]                              | chr5  | 157477304 | 157575775 | 7045  |
| TEX45      | -1.094297746 | 2.58575E-23 | 4.17473E-22 | DOWN   | testis expressed 45 [Source:HGNC Symbol;Acc:HGNC:24745]                                         | chr19 | 7497559   | 7508450   | 1679  |
| SLC4A3     | -0.78643782  | 2.61546E-23 | 4.21894E-22 | DOWN   | solute carrier family 44 member 3 [Source:HGNC Symbol;Acc:HGNC:28689]                           | chr1  | 94820342  | 94895246  | 2499  |
| OMP        | -1.018279162 | 2.64501E-23 | 4.26282E-22 | DOWN   | olfactory marker protein [Source:HGNC Symbol;Acc:HGNC:8136]                                     | chr11 | 77102840  | 77103331  | 492   |
| P2RY12     | 1.006692649  | 2.68959E-23 | 4.32697E-22 | UP     | purinergic receptor P2Y12 [Source:HGNC Symbol;Acc:HGNC:18124]                                   | chr3  | 151337380 | 151384812 | 1766  |
| SOWAHB     | -0.989548227 | 2.74711E-23 | 4.41559E-22 | DOWN   | sonosodwah ankyrin repeat domain family member B [Source:HGNC Symbol;Acc:HGNC:32958]            | chr4  | 76894928  | 76898147  | 3220  |
| IGLV5-37   | 1.533932997  | 2.89079E-23 | 4.64241E-22 | UP     | immunoglobulin lambda variable 5-37 [Source:HGNC Symbol;Acc:HGNC:5922]                          | chr22 | 22427540  | 22428035  | 374   |
| EMB        | 0.599793765  | 2.90334E-23 | 4.65845E-22 | UP     | embigin [Source:HGNC Symbol;Acc:HGNC:30465]                                                     | chr5  | 50396192  | 50441367  | 4550  |
| GLIPR1     | 0.588340721  | 3.11485E-23 | 4.98119E-22 | UP     | GLI pathogenesis related 1 [Source:HGNC Symbol;Acc:HGNC:17001]                                  | chr12 | 75480680  | 75503853  | 5877  |
| CLEC9A     | 1.020840396  | 3.22948E-23 | 5.15438E-22 | UP     | C-type lectin domain containing 9A [Source:HGNC Symbol;Acc:HGNC:26705]                          | chr12 | 10030677  | 10066027  | 1734  |
| ZNF804A    | 0.818633684  | 3.25008E-23 | 5.18269E-22 | UP     | zinc finger protein 804A [Source:HGNC Symbol;Acc:HGNC:21711]                                    | chr2  | 184598366 | 184939492 | 4694  |
| GRHL3      | -1.443801116 | 3.58476E-23 | 5.70134E-22 | DOWN   | zinc finger protein 3 [Source:HGNC Symbol;Acc:HGNC:25839]                                       | chr1  | 24319322  | 24364482  | 3424  |
| MMP25      | 0.872173801  | 3.82271E-23 | 6.07445E-22 | UP     | matrix metalloproteinase 25 [Source:HGNC Symbol;Acc:HGNC:14246]                                 | chr16 | 3046681   | 3060726   | 3674  |
| SCN5A      | -1.140673317 | 4.07075E-23 | 6.45729E-22 | DOWN   | sodium voltage-gated channel alpha subunit 5 [Source:HGNC Symbol;Acc:HGNC:10593]                | chr3  | 38548057  | 38649673  | 8667  |
| UPK1B      | -1.986440391 | 4.52816E-23 | 7.15158E-22 | DOWN   | uroplakin 1B [Source:HGNC Symbol;Acc:HGNC:12578]                                                | chr3  | 119173517 | 119205153 | 2119  |
| TBX2       | -0.811339897 | 4.65901E-23 | 7.34543E-22 | DOWN   | T-box 2 [Source:HGNC Symbol;Acc:HGNC:11597]                                                     | chr17 | 61399896  | 61409425  | 3339  |
| SMIM25     | 0.953786007  | 5.55548E-23 | 8.7209E-22  | UP     | small integral membrane protein 25 [Source:HGNC Symbol;Acc:HGNC:50328]                          | chr20 | 50267486  | 50279795  | 2010  |
| SLCSA7     | -1.261426891 | 5.94006E-23 | 9.31655E-22 | DOWN   | solute carrier family 5 member 7 [Source:HGNC Symbol;Acc:HGNC:14025]                            | chr2  | 107986523 | 108013994 | 5168  |
| SLC1A3     | 0.71061467   | 6.14879E-23 | 9.63559E-22 | UP     | solute carrier family 1 member 3 [Source:HGNC Symbol;Acc:HGNC:10941]                            | chr5  | 36606355  | 36688334  | 4170  |
| TTC16      | 1.044223668  | 6.20957E-23 | 9.72242E-22 | UP     | tetratricopeptide repeat domain 16 [Source:HGNC Symbol;Acc:HGNC:26536]                          | chr9  | 127716066 | 127731600 | 2897  |
| GPR19      | 0.78837358   | 6.39259E-23 | 1.00003E-21 | UP     | G protein-coupled receptor 19 [Source:HGNC Symbol;Acc:HGNC:4473]                                | chr12 | 12660891  | 12696187  | 1927  |
| NME8       | 0.870288316  | 6.81654E-23 | 1.06544E-21 | UP     | NME/NM23 family member 8 [Source:HGNC Symbol;Acc:HGNC:16473]                                    | chr7  | 37848597  | 37900401  | 2379  |
| HS3ST3B1   | 0.859332575  | 8.4954E-23  | 1.32556E-21 | UP     | heparan sulfate-glucosamine 3-sulfotransferase 3B1 [Source:HGNC Symbol;Acc:HGNC:5198]           | chr17 | 14301083  | 14349404  | 5367  |
| GGT6       | -1.406711254 | 9.25919E-23 | 1.44349E-21 | DOWN   | gamma-glutamyltransferase 6 [Source:HGNC Symbol;Acc:HGNC:26891]                                 | chr17 | 4556927   | 4560818   | 3060  |
| CCL11      | 1.151800151  | 9.52108E-23 | 1.48305E-21 | UP     | C-C motif chemokine ligand 11 [Source:HGNC Symbol;Acc:HGNC:10610]                               | chr17 | 34285668  | 34288334  | 1079  |
| TREM2      | 0.823882775  | 9.7079E-23  | 1.51085E-21 | UP     | triggering receptor expressed on myeloid cells 2 [Source:HGNC Symbol;Acc:HGNC:17761]            | chr6  | 41158506  | 41163186  | 1095  |
| TSPAN32    | 0.91195327   | 1.03372E-22 | 1.6074E-21  | UP     | tetraspanin 32 [Source:HGNC Symbol;Acc:HGNC:13410]                                              | chr11 | 2302013   | 2318200   | 1497  |
| LILRB5     | 0.730592153  | 1.10567E-22 | 1.71488E-21 | UP     | leukocyte immunoglobulin like receptor B5 [Source:HGNC Symbol;Acc:HGNC:6609]                    | chr19 | 54249431  | 54257301  | 3239  |
| AC015688.5 | 0.880295566  | 1.1836E-22  | 1.83105E-21 | UP     |                                                                                                 | chr17 | 27623364  | 27640777  | 603   |
| MFNG       | 0.618722286  | 1.55807E-22 | 2.40421E-21 | UP     | MFNG O-fucosylpeptide 3-beta-N-acetylglucosaminyltransferase [Source:HGNC Symbol;Acc:HGNC:7038] | chr22 | 37469063  | 37486401  | 2097  |
| EPN3       | -1.13061957  | 1.56781E-22 | 2.41718E-21 | DOWN   | epsin 3 [Source:HGNC Symbol;Acc:HGNC:18235]                                                     | chr17 | 50532543  | 50543750  | 4114  |
| CDH23      | -0.942965454 | 1.61802E-22 | 2.49247E-21 | DOWN   | cadherin related 23 [Source:HGNC Symbol;Acc:HGNC:13733]                                         | chr10 | 71396934  | 71815947  | 12433 |
| Z82206.1   | 0.90175167   | 1.71441E-22 | 2.63423E-21 | UP     |                                                                                                 | chr22 | 39960397  | 39964718  | 1322  |
| PIGZ       | -0.741194209 | 1.71951E-22 | 2.63983E-21 | DOWN   | phosphatidylinositol glycan anchor biosynthesis class Z [Source:HGNC Symbol;Acc:HGNC:30596]     | chr3  | 196946343 | 196968871 | 2739  |
| CBR3-AS1   | -0.690739594 | 1.8057E-22  | 2.76981E-21 | DOWN   | CBR3 antisense RNA 1 [Source:HGNC Symbol;Acc:HGNC:43664]                                        | chr21 | 36131767  | 36175815  | 4958  |
| P2RX5      | 1.075048291  | 1.88113E-22 | 2.88307E-21 | UP     | purinergic receptor P2X 5 [Source:HGNC Symbol;Acc:HGNC:8536]                                    | chr17 | 3672199   | 3696404   | 2812  |
| EVX1       | -1.222121799 | 2.2781E-22  | 3.47972E-21 | DOWN   | even-skipped homeobox 1 [Source:HGNC Symbol;Acc:HGNC:3506]                                      | chr7  | 27242700  | 27247825  | 2955  |
| PPARG      | -1.027385378 | 2.61365E-22 | 3.9822E-21  | DOWN   | peroxisome proliferator activated receptor gamma [Source:HGNC Symbol;Acc:HGNC:9236]             | chr3  | 12287368  | 12434356  | 2951  |
| PAX5       | 1.356100766  | 3.04278E-22 | 4.61662E-21 | UP     | paired box 5 [Source:HGNC Symbol;Acc:HGNC:8619]                                                 | chr9  | 36833275  | 37034185  | 8615  |
| AC092329.4 | -0.693107945 | 3.50504E-22 | 5.31354E-21 | DOWN   |                                                                                                 | chr19 | 23259906  | 23274251  | 3720  |
| GPR34      | 0.643528117  | 3.86753E-22 | 5.84838E-21 | UP     | G protein-coupled receptor 34 [Source:HGNC Symbol;Acc:HGNC:4490]                                | chrX  | 41688973  | 41697277  | 1928  |
| MAPK10     | -0.792745087 | 3.93783E-22 | 5.94973E-21 | DOWN   | mitogen-activated protein kinase 10 [Source:HGNC Symbol;Acc:HGNC:6872]                          | chr4  | 85990007  | 86594625  | 22619 |



| PARAM      | logFC        | pval        | pval.adj    | UPDOWN | desc                                                                                              | chr   | start     | end       | size  |
|------------|--------------|-------------|-------------|--------|---------------------------------------------------------------------------------------------------|-------|-----------|-----------|-------|
| SLC45A3    | -0.67698285  | 4.11495E-22 | 6.21217E-21 | DOWN   | solute carrier family 45 member 3 [Source:HGNC Symbol;Acc:HGNC:8642]                              | chr1  | 205657851 | 205680459 | 3341  |
| IL131RA    | 1.420216552  | 4.67278E-22 | 7.03672E-21 | UP     | interleukin 31 receptor A [Source:HGNC Symbol;Acc:HGNC:18969]                                     | chr5  | 55851379  | 55922853  | 4576  |
| IGHA2      | 1.443208133  | 4.71859E-22 | 7.09982E-21 | UP     | immunoglobulin heavy constant alpha 2 (A2m marker) [Source:HGNC Symbol;Acc:HGNC:5479]             | chr14 | 105583731 | 105588395 | 1320  |
| S1PR4      | 0.860953076  | 4.99679E-22 | 7.50595E-21 | UP     | sphingosine-1-phosphate receptor 4 [Source:HGNC Symbol;Acc:HGNC:3170]                             | chr19 | 3178768   | 3180332   | 1565  |
| EEF1DP3    | -0.946148822 | 5.12145E-22 | 7.68684E-21 | DOWN   | eukaryotic translation elongation factor 1 delta pseudogene 3 [Source:HGNC Symbol;Acc:HGNC:30486] | chr13 | 31846841  | 31953472  | 1309  |
| CD300C     | 0.759001385  | 5.16622E-22 | 7.74762E-21 | UP     | CD300c molecule [Source:HGNC Symbol;Acc:HGNC:19320]                                               | chr17 | 74541108  | 74546143  | 1517  |
| AP002004.1 | 0.773761637  | 5.29002E-22 | 7.92018E-21 | UP     |                                                                                                   | chr11 | 104901549 | 104919073 | 4002  |
| CPNE8      | 0.608984677  | 5.6985E-22  | 8.51768E-21 | UP     | copine 8 [Source:HGNC Symbol;Acc:HGNC:23498]                                                      | chr12 | 38652185  | 38907430  | 4171  |
| GDF15      | -1.070297323 | 5.95524E-22 | 8.87948E-21 | DOWN   | growth differentiation factor 15 [Source:HGNC Symbol;Acc:HGNC:30142]                              | chr19 | 18386158  | 18389176  | 1200  |
| TVP23A     | 0.92572847   | 6.04627E-22 | 9.00781E-21 | UP     | trans-golgi network vesicle protein 23 homolog A [Source:HGNC Symbol;Acc:HGNC:20398]              | chr16 | 10761226  | 10818785  | 3909  |
| RGS9       | 0.725474917  | 6.158E-22   | 9.16672E-21 | UP     | regulator of G protein signaling 9 [Source:HGNC Symbol;Acc:HGNC:10004]                            | chr17 | 65100986  | 65227703  | 2573  |
| CRAC1      | -1.687749643 | 6.22636E-22 | 9.26088E-21 | DOWN   | cartilage acidic protein 1 [Source:HGNC Symbol;Acc:HGNC:14882]                                    | chr10 | 97865000  | 98030828  | 3063  |
| TSPAN12    | -0.778225226 | 6.44439E-22 | 9.57732E-21 | DOWN   | tetraspanin 12 [Source:HGNC Symbol;Acc:HGNC:21641]                                                | chr7  | 120787320 | 120858357 | 2798  |
| RASGEF1B   | 0.591547963  | 6.47367E-22 | 9.61295E-21 | UP     | RasGEF domain family member 1B [Source:HGNC Symbol;Acc:HGNC:24881]                                | chr4  | 81426393  | 82044244  | 9604  |
| LRP4       | -0.846331869 | 6.75779E-22 | 1.00266E-20 | DOWN   | LDL receptor related protein 4 [Source:HGNC Symbol;Acc:HGNC:6696]                                 | chr11 | 46856868  | 46918622  | 8076  |
| SLC12A3    | 1.290477016  | 7.03975E-22 | 1.04279E-20 | UP     | solute carrier family 12 member 3 [Source:HGNC Symbol;Acc:HGNC:10912]                             | chr16 | 56865207  | 56915850  | 5567  |
| FSTL4      | -1.424387206 | 7.34845E-22 | 1.08674E-20 | DOWN   | follistatin like 4 [Source:HGNC Symbol;Acc:HGNC:21389]                                            | chr5  | 133196455 | 133612564 | 5420  |
| FAM159A    | 0.916748951  | 7.82771E-22 | 1.15386E-20 | UP     | family with sequence similarity 159 member A [Source:HGNC Symbol;Acc:HGNC:28757]                  | chr1  | 52633344  | 52657065  | 748   |
| CNGA1      | -1.20099174  | 7.96988E-22 | 1.17386E-20 | DOWN   | cyclic nucleotide gated channel alpha 1 [Source:HGNC Symbol;Acc:HGNC:2148]                        | chr4  | 47935977  | 48016592  | 3133  |
| RPS10P2    | -0.836954332 | 8.12808E-22 | 1.19619E-20 | DOWN   | ribosomal protein S10 pseudogene 2 [Source:HGNC Symbol;Acc:HGNC:16594]                            | chr20 | 14757563  | 14758056  | 494   |
| SLC25A53   | 0.791200417  | 8.96899E-22 | 1.31567E-20 | UP     | solute carrier family 25 member 53 [Source:HGNC Symbol;Acc:HGNC:31894]                            | chrX  | 104009214 | 104157027 | 6225  |
| RHOU       | -0.712447012 | 9.58714E-22 | 1.40407E-20 | DOWN   | ras homolog family member U [Source:HGNC Symbol;Acc:HGNC:17794]                                   | chr1  | 228735077 | 228746669 | 4372  |
| GPX2       | -1.819750461 | 9.80033E-22 | 1.43414E-20 | DOWN   | glutathione peroxidase 2 [Source:HGNC Symbol;Acc:HGNC:4554]                                       | chr14 | 64939153  | 64942905  | 1087  |
| RAB37      | 0.850922093  | 9.95325E-22 | 1.45534E-20 | UP     | RAB37, member RAS oncogene family [Source:HGNC Symbol;Acc:HGNC:30268]                             | chr17 | 74705078  | 74747335  | 4497  |
| BMP3       | -1.48602982  | 1.04769E-21 | 1.53067E-20 | DOWN   | bone morphogenetic protein 3 [Source:HGNC Symbol;Acc:HGNC:1070]                                   | chr4  | 81030965  | 81057531  | 5734  |
| SCNN1G     | -1.480695515 | 1.07306E-21 | 1.56647E-20 | DOWN   | sodium channel epithelial 1 gamma subunit [Source:HGNC Symbol;Acc:HGNC:10602]                     | chr16 | 23182715  | 23216883  | 3507  |
| FMOP9      | -1.657773634 | 1.09833E-21 | 1.60207E-20 | DOWN   | flavin containing monooxygenase 9 pseudogene [Source:HGNC Symbol;Acc:HGNC:32210]                  | chr1  | 166603916 | 166631400 | 2270  |
| KCNA2      | 1.078694053  | 1.1476E-21  | 1.66991E-20 | UP     | potassium voltage-gated channel subfamily A member 2 [Source:HGNC Symbol;Acc:HGNC:6220]           | chr1  | 110593580 | 110631474 | 13238 |
| BICD1      | -1.026547851 | 1.17078E-21 | 1.70228E-20 | DOWN   | BICD family like cargo adaptor 2 [Source:HGNC Symbol;Acc:HGNC:33584]                              | chr16 | 3027684   | 3036926   | 3879  |
| CCL7       | 1.259694723  | 1.22446E-21 | 1.77748E-20 | UP     | C-C motif chemokine ligand 7 [Source:HGNC Symbol;Acc:HGNC:10634]                                  | chr17 | 34270221  | 34272242  | 863   |
| DEG52      | -1.141860355 | 1.25005E-21 | 1.81318E-20 | DOWN   | delta 4-desaturase, sphingolipid 2 [Source:HGNC Symbol;Acc:HGNC:20113]                            | chr14 | 100143957 | 100161063 | 4352  |
| ATP2C2     | -1.358403977 | 1.33464E-21 | 1.93432E-20 | DOWN   | ATPase secretory pathway Ca <sup>2+</sup> transporting 2 [Source:HGNC Symbol;Acc:HGNC:29103]      | chr16 | 84368527  | 84464187  | 3472  |
| IFIT1      | 0.892492346  | 1.33721E-21 | 1.93649E-20 | UP     | interferon induced protein with tetratricopeptide repeats 1 [Source:HGNC Symbol;Acc:HGNC:5407]    | chr10 | 89392546  | 89406486  | 4613  |
| RGL3       | -1.043775396 | 1.38576E-21 | 2.00521E-20 | DOWN   | ral guanine nucleotide dissociation stimulator like 3 [Source:HGNC Symbol;Acc:HGNC:30282]         | chr19 | 11394057  | 11419342  | 2560  |
| CCRL2      | 0.613596745  | 1.53876E-21 | 2.22482E-20 | UP     | C-C motif chemokine receptor like 2 [Source:HGNC Symbol;Acc:HGNC:1612]                            | chr3  | 46407163  | 46409523  | 2120  |
| KRTAP5-8   | -1.298108375 | 1.63107E-21 | 2.35641E-20 | DOWN   | keratin associated protein 5-8 [Source:HGNC Symbol;Acc:HGNC:23603]                                | chr11 | 71538025  | 71539207  | 1183  |
| SSTR2      | 0.835460236  | 1.63488E-21 | 2.35927E-20 | UP     | somatostatin receptor 2 [Source:HGNC Symbol;Acc:HGNC:11331]                                       | chr17 | 73165012  | 73176633  | 7683  |
| DGAT2      | -0.877218149 | 1.63565E-21 | 2.35927E-20 | DOWN   | diacylglycerol O-acyltransferase 2 [Source:HGNC Symbol;Acc:HGNC:16940]                            | chr11 | 75768732  | 75801535  | 2454  |
| KYNU       | 0.835480529  | 1.72206E-21 | 2.47996E-20 | UP     | kynureninase [Source:HGNC Symbol;Acc:HGNC:6469]                                                   | chr2  | 142877498 | 143055832 | 16486 |
| SSH3       | -0.592879825 | 1.73656E-21 | 2.49886E-20 | DOWN   | slingshot protein phosphatase 3 [Source:HGNC Symbol;Acc:HGNC:30581]                               | chr11 | 67303448  | 67312605  | 3024  |
| OSR1       | -0.936591376 | 2.10116E-21 | 3.01631E-20 | DOWN   | odd-skipped related transcription factor 1 [Source:HGNC Symbol;Acc:HGNC:8111]                     | chr2  | 19351485  | 19358653  | 1936  |
| RHBG       | -1.350565985 | 2.23553E-21 | 3.20668E-20 | DOWN   | Rh family B glycoprotein (gene/pseudogene) [Source:HGNC Symbol;Acc:HGNC:14572]                    | chr1  | 156369212 | 156385219 | 1789  |
| NAALADL2   | -0.761832082 | 2.27339E-21 | 3.25583E-20 | DOWN   | N-acetylated alpha-linked acidic dipeptidase like 2 [Source:HGNC Symbol;Acc:HGNC:23219]           | chr3  | 174859280 | 175810552 | 9865  |
| L3MBTL4    | 0.802623766  | 2.3722E-21  | 3.39199E-20 | UP     | L3MBTL4, histone methyl-lysine binding protein [Source:HGNC Symbol;Acc:HGNC:26677]                | chr18 | 5954706   | 6414911   | 6546  |
| IPO5P1     | -0.735420986 | 2.37633E-21 | 3.39521E-20 | DOWN   | importin 5 pseudogene 1 [Source:HGNC Symbol;Acc:HGNC:49687]                                       | chr19 | 23255053  | 23257939  | 2887  |
| ANKRD22    | 0.88342004   | 2.43765E-21 | 3.48009E-20 | UP     | ankyrin repeat domain 22 [Source:HGNC Symbol;Acc:HGNC:28321]                                      | chr10 | 88822132  | 88851818  | 1596  |
| AL671277.1 | 0.845309803  | 2.50209E-21 | 3.56927E-20 | UP     |                                                                                                   | chr6  | 29942075  | 29943067  | 993   |
| MMP9       | 1.069739585  | 2.59116E-21 | 3.69341E-20 | UP     | matrix metalloproteinase 9 [Source:HGNC Symbol;Acc:HGNC:7176]                                     | chr20 | 46008908  | 46016561  | 2336  |
| WSCD2      | -1.250973427 | 2.5972E-21  | 3.69913E-20 | DOWN   | WSC domain containing 2 [Source:HGNC Symbol;Acc:HGNC:29117]                                       | chr12 | 108129471 | 108250537 | 5226  |
| ADAMTS19   | -1.223779571 | 3.02766E-21 | 4.29871E-20 | DOWN   | ADAM metalloproteinase with thrombospondin type 1 motif 19 [Source:HGNC Symbol;Acc:HGNC:17111]    | chr5  | 129460265 | 129738683 | 5234  |
| MSNP1      | 0.65239548   | 3.05186E-21 | 4.32967E-20 | UP     | moesin pseudogene 1 [Source:HGNC Symbol;Acc:HGNC:7374]                                            | chr5  | 25909503  | 25911234  | 1732  |
| NEIL3      | 0.610163545  | 3.10318E-21 | 4.39905E-20 | UP     | nei like DNA glycosylase 3 [Source:HGNC Symbol;Acc:HGNC:24573]                                    | chr4  | 177309836 | 177362943 | 2408  |
| THEM6      | -0.657184994 | 3.41292E-21 | 4.83435E-20 | DOWN   | thioesterase superfamily member 6 [Source:HGNC Symbol;Acc:HGNC:29656]                             | chr8  | 142727203 | 142736927 | 2259  |
| GPDI1      | -0.599478269 | 3.48508E-21 | 4.9327E-20  | DOWN   | glycerol-3-phosphate dehydrogenase 1 like [Source:HGNC Symbol;Acc:HGNC:28956]                     | chr3  | 32106511  | 32168713  | 4060  |
| AC244226.1 | 2.185063824  | 3.58191E-21 | 5.0658E-20  | UP     | immunoglobulin heavy variable 7-4-1 [Source:UniProtKB/Swiss-Prot;Acc:A0A019YVY3]                  | chr14 | 106025145 | 106025630 | 402   |
| RTN1       | 0.704071213  | 3.58821E-21 | 5.07076E-20 | UP     | reticulin 1 [Source:HGNC Symbol;Acc:HGNC:10467]                                                   | chr14 | 59595977  | 59870966  | 3915  |
| ST6GAL1    | 0.676060121  | 3.69309E-21 | 5.21491E-20 | UP     | ST6 beta-galactoside alpha-2,6-sialyltransferase 1 [Source:HGNC Symbol;Acc:HGNC:10860]            | chr3  | 186930485 | 187078553 | 4794  |

| PARAM      | logFC        | pval        | pval.adj    | UPDOWN | desc                                                                                                  | chr   | start     | end       | size  |
|------------|--------------|-------------|-------------|--------|-------------------------------------------------------------------------------------------------------|-------|-----------|-----------|-------|
| TMEM45B    | -1.278145226 | 3.69861E-21 | 5.21864E-20 | DOWN   | transmembrane protein 45B [Source:HGNC Symbol;Acc:HGNC:25194]                                         | chr11 | 129815819 | 129860003 | 2507  |
| ERMN       | 0.885822102  | 4.05825E-21 | 5.71718E-20 | UP     | ermin [Source:HGNC Symbol;Acc:HGNC:29208]                                                             | chr2  | 157318625 | 157327713 | 4186  |
| MROH2A     | -1.454273    | 4.10832E-21 | 5.77873E-20 | DOWN   | maestro heat like repeat family member 2A [Source:HGNC Symbol;Acc:HGNC:27936]                         | chr2  | 233775679 | 233833423 | 5502  |
| PHGR1      | -1.824455723 | 4.13641E-21 | 5.81374E-20 | DOWN   | proline, histidine and glycine rich 1 [Source:HGNC Symbol;Acc:HGNC:37226]                             | chr15 | 40351033  | 40356434  | 436   |
| AC139495.3 | 0.87895201   | 4.28849E-21 | 6.02282E-20 | UP     |                                                                                                       | chr5  | 69631963  | 69636399  | 4437  |
| SRCIN1     | -0.95744669  | 4.40939E-21 | 6.18783E-20 | DOWN   | SRC kinase signaling inhibitor 1 [Source:HGNC Symbol;Acc:HGNC:29506]                                  | chr17 | 38530016  | 38605930  | 7160  |
| C16orf54   | 1.034484969  | 4.52059E-21 | 6.33896E-20 | UP     | chromosome 16 open reading frame 54 [Source:HGNC Symbol;Acc:HGNC:26649]                               | chr16 | 29742463  | 29746006  | 2585  |
| PLCD3      | -0.706504341 | 4.54143E-21 | 6.36327E-20 | DOWN   | phospholipase C delta 3 [Source:HGNC Symbol;Acc:HGNC:9061]                                            | chr17 | 45108967  | 45132498  | 6107  |
| ANKRD33B   | 0.841291032  | 4.90372E-21 | 6.85859E-20 | UP     | ankyrin repeat domain 33B [Source:HGNC Symbol;Acc:HGNC:35240]                                         | chr5  | 10564468  | 10657816  | 9188  |
| CPNE5      | 0.602026905  | 5.13851E-21 | 7.17216E-20 | UP     | sapone 5 [Source:HGNC Symbol;Acc:HGNC:2318]                                                           | chr6  | 36740778  | 36840002  | 4022  |
| SCCPDH     | -0.595630131 | 5.27981E-21 | 7.35805E-20 | DOWN   | saccharopine dehydrogenase (putative) [Source:HGNC Symbol;Acc:HGNC:24275]                             | chr1  | 246724047 | 246768137 | 2503  |
| CGN        | -0.995489398 | 5.68356E-21 | 7.91464E-20 | DOWN   | cingulin [Source:HGNC Symbol;Acc:HGNC:17429]                                                          | chr1  | 151511397 | 151538692 | 5091  |
| CCL13      | 1.083904341  | 6.5918E-21  | 9.15831E-20 | UP     | C-C motif chemokine ligand 13 [Source:HGNC Symbol;Acc:HGNC:10611]                                     | chr17 | 34356452  | 34358610  | 851   |
| HLA-DPB2   | 0.885492559  | 7.07905E-21 | 9.82773E-20 | UP     | major histocompatibility complex, class II, DP beta 2 (pseudogene) [Source:HGNC Symbol;Acc:HGNC:4941] | chr6  | 33112451  | 33129084  | 1600  |
| PLEKH6A    | -0.820322864 | 7.40952E-21 | 1.02787E-19 | DOWN   | pleckstrin homology domain containing A6 [Source:HGNC Symbol;Acc:HGNC:17053]                          | chr1  | 204218851 | 204359916 | 7892  |
| OVOL1      | -1.138647773 | 7.78721E-21 | 1.07943E-19 | DOWN   | ovo like transcriptional repressor 1 [Source:HGNC Symbol;Acc:HGNC:8525]                               | chr11 | 65787022  | 65797219  | 3356  |
| BAMBI      | -0.942928477 | 9.09271E-21 | 1.2556E-19  | DOWN   | BMP and activin membrane bound inhibitor [Source:HGNC Symbol;Acc:HGNC:30251]                          | chr10 | 28677342  | 28682939  | 1877  |
| RHOF       | 0.803624996  | 9.90252E-21 | 1.36534E-19 | UP     | ras homolog family member F, filopodia associated [Source:HGNC Symbol;Acc:HGNC:15703]                 | chr12 | 121777754 | 121794262 | 3515  |
| LSP1       | 0.5923796    | 1.13893E-20 | 1.56439E-19 | UP     | lymphocyte-specific protein 1 [Source:HGNC Symbol;Acc:HGNC:6707]                                      | chr11 | 1852970   | 1892263   | 3727  |
| SNTG1      | -1.581899287 | 1.17152E-20 | 1.60793E-19 | DOWN   | syntrophin gamma 1 [Source:HGNC Symbol;Acc:HGNC:13740]                                                | chr8  | 49909789  | 50794118  | 3773  |
| CR1        | 0.785915245  | 1.21884E-20 | 1.67162E-19 | UP     | complement C3b/C4b receptor 1 (Knops blood group) [Source:HGNC Symbol;Acc:HGNC:2334]                  | chr1  | 207496157 | 207640647 | 8819  |
| PHEX       | 0.729352003  | 1.28366E-20 | 1.75786E-19 | UP     | phosphate regulating endopeptidase homolog X-linked [Source:HGNC Symbol;Acc:HGNC:8918]                | chrX  | 22032441  | 22251310  | 6172  |
| S100P      | -1.460070526 | 1.32E-20    | 1.80626E-19 | DOWN   | S100 calcium binding protein P [Source:HGNC Symbol;Acc:HGNC:10504]                                    | chr4  | 6693069   | 6697169   | 1279  |
| AC107959.1 | 0.651328252  | 1.34079E-20 | 1.83332E-19 | UP     |                                                                                                       | chr8  | 23006381  | 23019335  | 1945  |
| SLFN13     | 0.774625022  | 1.42831E-20 | 1.95152E-19 | UP     | schlafen family member 13 [Source:HGNC Symbol;Acc:HGNC:26481]                                         | chr17 | 35435096  | 35448837  | 8823  |
| KRT20      | -2.203556361 | 1.7212E-20  | 2.34463E-19 | DOWN   | keratin 20 [Source:HGNC Symbol;Acc:HGNC:20412]                                                        | chr17 | 40875941  | 40885227  | 1737  |
| CYP4F23P   | -1.151808805 | 1.73234E-20 | 2.35804E-19 | DOWN   | cytochrome P450 family 4 subfamily F member 23, pseudogene [Source:HGNC Symbol;Acc:HGNC:39944]        | chr19 | 15564074  | 15584709  | 1579  |
| IL18       | 0.650312177  | 1.75777E-20 | 2.39086E-19 | UP     | interleukin 18 [Source:HGNC Symbol;Acc:HGNC:5986]                                                     | chr11 | 112143251 | 112164117 | 1168  |
| UPK3B      | -1.309480395 | 2.03008E-20 | 2.75711E-19 | DOWN   | uroplakin 3B [Source:HGNC Symbol;Acc:HGNC:21444]                                                      | chr7  | 76510428  | 76516521  | 2538  |
| AC010329.1 | -1.096013918 | 2.17293E-20 | 2.9489E-19  | DOWN   |                                                                                                       | chr19 | 20746923  | 20755250  | 8328  |
| ENPP2      | 0.61600725   | 2.49364E-20 | 3.37909E-19 | UP     | ectonucleotide pyrophosphatase/phosphodiesterase 2 [Source:HGNC Symbol;Acc:HGNC:3357]                 | chr8  | 119557086 | 119673453 | 3603  |
| MAP7       | -0.590560947 | 2.7963E-20  | 3.77511E-19 | DOWN   | microtubule associated protein 7 [Source:HGNC Symbol;Acc:HGNC:6869]                                   | chr6  | 136342281 | 136550819 | 5447  |
| FCRL1      | 1.346974647  | 3.47417E-20 | 4.67633E-19 | UP     | Fc receptor like 1 [Source:HGNC Symbol;Acc:HGNC:18509]                                                | chr1  | 157794536 | 157820105 | 2983  |
| FAAH       | -0.589254452 | 3.67294E-20 | 4.94021E-19 | DOWN   | fatty acid amide hydrolase [Source:HGNC Symbol;Acc:HGNC:3553]                                         | chr1  | 46394265  | 46413845  | 2094  |
| ICA1       | -0.662147999 | 3.81132E-20 | 5.12254E-19 | DOWN   | islet cell autoantigen 1 [Source:HGNC Symbol;Acc:HGNC:5343]                                           | chr7  | 8113184   | 8262612   | 3419  |
| XIRP1      | 1.238451978  | 4.34091E-20 | 5.82568E-19 | UP     | xin actin binding repeat containing 1 [Source:HGNC Symbol;Acc:HGNC:14301]                             | chr3  | 39183210  | 39192596  | 6467  |
| IGHG4      | 1.753736388  | 4.81315E-20 | 6.44514E-19 | UP     | immunoglobulin heavy constant gamma 4 (G4m marker) [Source:HGNC Symbol;Acc:HGNC:5528]                 | chr14 | 105620506 | 105626066 | 2597  |
| TMC4       | -0.795247025 | 5.07566E-20 | 6.79164E-19 | DOWN   | transmembrane channel like 4 [Source:HGNC Symbol;Acc:HGNC:22998]                                      | chr19 | 54160108  | 54173250  | 2470  |
| NOS1AP     | -0.69122222  | 6.60134E-20 | 8.80713E-19 | DOWN   | nitric oxide synthase 1 adaptor protein [Source:HGNC Symbol;Acc:HGNC:16859]                           | chr1  | 162069774 | 162370475 | 7354  |
| CCSER1     | -0.857656649 | 6.76485E-20 | 9.01864E-19 | DOWN   | coiled-coil serine rich protein 1 [Source:HGNC Symbol;Acc:HGNC:29349]                                 | chr4  | 90127585  | 91601913  | 7723  |
| IYD        | -1.537710028 | 6.98244E-20 | 9.30188E-19 | DOWN   | iodotyrosine deiodinase [Source:HGNC Symbol;Acc:HGNC:21071]                                           | chr6  | 150368892 | 150405969 | 10275 |
| SKAP1      | 0.65434628   | 7.00685E-20 | 9.32755E-19 | UP     | src kinase associated phosphoprotein 1 [Source:HGNC Symbol;Acc:HGNC:15605]                            | chr17 | 48133440  | 48430219  | 1854  |
| GDPD2      | -1.451215215 | 7.01485E-20 | 9.33135E-19 | DOWN   | glycerophosphodiester phosphodiesterase domain containing 2 [Source:HGNC Symbol;Acc:HGNC:25974]       | chrX  | 70423031  | 70433390  | 2438  |
| ZNF703     | -0.669788062 | 7.29576E-20 | 9.6837E-19  | DOWN   | zinc finger protein 703 [Source:HGNC Symbol;Acc:HGNC:25883]                                           | chr8  | 37695751  | 37700021  | 3349  |
| MCF2L2     | 0.632039552  | 8.29483E-20 | 1.09856E-18 | UP     | MCF.2 cell line derived transforming sequence-like 2 [Source:HGNC Symbol;Acc:HGNC:30319]              | chr3  | 183178043 | 183428275 | 6269  |
| C1orf116   | -1.123946882 | 8.47248E-20 | 1.12023E-18 | DOWN   | chromosome 1 open reading frame 116 [Source:HGNC Symbol;Acc:HGNC:28667]                               | chr1  | 207018521 | 207032756 | 5502  |
| SMAD9      | -0.667511384 | 8.47697E-20 | 1.12023E-18 | DOWN   | SMAD family member 9 [Source:HGNC Symbol;Acc:HGNC:6774]                                               | chr13 | 36844831  | 36920272  | 5592  |
| FDSCP      | 1.716285621  | 8.62596E-20 | 1.13909E-18 | UP     | follicular dendritic cell secreted protein [Source:HGNC Symbol;Acc:HGNC:19215]                        | chr4  | 70226071  | 70235252  | 566   |
| PTGDR      | 0.852966872  | 1.02437E-19 | 1.35173E-18 | UP     | prostaglandin D2 receptor [Source:HGNC Symbol;Acc:HGNC:9591]                                          | chr14 | 52267713  | 52276724  | 3033  |
| SPTA1      | 0.998369936  | 1.07458E-19 | 1.41659E-18 | UP     | spectrin alpha, erythrocytic 1 [Source:HGNC Symbol;Acc:HGNC:11272]                                    | chr1  | 158610706 | 158686698 | 7999  |
| EXOC3L4    | 1.013208699  | 1.12841E-19 | 1.48578E-18 | UP     | exocyst complex component 3 like 4 [Source:HGNC Symbol;Acc:HGNC:20120]                                | chr14 | 103100144 | 103110271 | 2293  |
| ID4        | -0.825678669 | 1.18064E-19 | 1.5523E-18  | DOWN   | inhibitor of DNA binding 4, HLH protein [Source:HGNC Symbol;Acc:HGNC:5363]                            | chr6  | 19837386  | 19840684  | 2344  |
| COL9A1     | -1.388905736 | 1.26498E-19 | 1.66078E-18 | DOWN   | collagen type IX alpha 1 chain [Source:HGNC Symbol;Acc:HGNC:2217]                                     | chr6  | 70215061  | 70303083  | 5241  |
| CHI3L2     | 1.023437017  | 1.30249E-19 | 1.70755E-18 | UP     | chitinase 3 like 2 [Source:HGNC Symbol;Acc:HGNC:1933]                                                 | chr1  | 111200771 | 111243440 | 2647  |
| NPAS2      | -0.611895725 | 1.40005E-19 | 1.83148E-18 | DOWN   | neuronal PAS domain protein 2 [Source:HGNC Symbol;Acc:HGNC:7895]                                      | chr2  | 100820152 | 100996829 | 4007  |
| S100B      | 0.993748664  | 1.4665E-19  | 1.91703E-18 | UP     | S100 calcium binding protein B [Source:HGNC Symbol;Acc:HGNC:10500]                                    | chr21 | 46598962  | 46605208  | 1448  |
| NLRP14     | 0.856155339  | 1.58293E-19 | 2.06624E-18 | UP     | NLR family pyrin domain containing 14 [Source:HGNC Symbol;Acc:HGNC:22939]                             | chr11 | 7020446   | 7071308   | 3628  |

| PARAM      | logFC        | pval        | pval.adj    | UPDOWN | desc                                                                                                    | chr   | start     | end       | size  |
|------------|--------------|-------------|-------------|--------|---------------------------------------------------------------------------------------------------------|-------|-----------|-----------|-------|
| NDRG2      | -0.643491658 | 1.61946E-19 | 2.11089E-18 | DOWN   | NDRG family member 2 [Source:HGNC Symbol;Acc:HGNC:14460]                                                | chr14 | 21016763  | 21070872  | 3873  |
| SLC9A4     | -1.566607234 | 1.83693E-19 | 2.3892E-18  | DOWN   | solute carrier family 9 member A4 [Source:HGNC Symbol;Acc:HGNC:11077]                                   | chr2  | 102473303 | 102533972 | 4138  |
| SYT17      | -0.651094279 | 1.91768E-19 | 2.49243E-18 | DOWN   | synaptotagmin 17 [Source:HGNC Symbol;Acc:HGNC:24119]                                                    | chr16 | 19168249  | 19268334  | 7145  |
| WNT10B     | 0.883750259  | 2.02739E-19 | 2.63125E-18 | UP     | Wnt family member 10B [Source:HGNC Symbol;Acc:HGNC:12775]                                               | chr12 | 48965340  | 48971763  | 2274  |
| TMEM176B   | 0.628696963  | 2.25538E-19 | 2.92506E-18 | UP     | transmembrane protein 176B [Source:HGNC Symbol;Acc:HGNC:29596]                                          | chr7  | 150791285 | 150801360 | 1979  |
| IL12A      | 0.808489052  | 2.38988E-19 | 3.09728E-18 | UP     | interleukin 12A [Source:HGNC Symbol;Acc:HGNC:5969]                                                      | chr3  | 159988750 | 159996019 | 1529  |
| MT2A       | 0.805781976  | 3.02039E-19 | 3.8977E-18  | UP     | metallothionein 2A [Source:HGNC Symbol;Acc:HGNC:7406]                                                   | chr16 | 56608199  | 56609497  | 991   |
| SPIC       | 1.232372341  | 3.14808E-19 | 4.05671E-18 | UP     | Spi-C transcription factor [Source:HGNC Symbol;Acc:HGNC:29549]                                          | chr12 | 101475421 | 101486997 | 1132  |
| CDC42BPG   | -0.644122049 | 3.20105E-19 | 4.12203E-18 | DOWN   | CDC42 binding protein kinase gamma [Source:HGNC Symbol;Acc:HGNC:29829]                                  | chr11 | 64823387  | 64844569  | 5742  |
| DTX4       | -0.666695619 | 3.68292E-19 | 4.73582E-18 | DOWN   | deltex E3 ubiquitin ligase 4 [Source:HGNC Symbol;Acc:HGNC:29151]                                        | chr11 | 59171430  | 59208587  | 5701  |
| AC124319.2 | -0.589569552 | 3.94549E-19 | 5.06627E-18 | DOWN   |                                                                                                         | chr17 | 80351828  | 80415118  | 3651  |
| FAM20A     | 0.702695699  | 4.16905E-19 | 5.34955E-18 | UP     | FAM20A, golgi associated secretory pathway pseudokinase [Source:HGNC Symbol;Acc:HGNC:23015]             | chr17 | 68535117  | 68601389  | 4740  |
| CHST15     | 0.617977877  | 4.28675E-19 | 5.49279E-18 | UP     | carbohydrate sulfotransferase 15 [Source:HGNC Symbol;Acc:HGNC:18137]                                    | chr10 | 124007666 | 124093607 | 6554  |
| CD1D       | 0.68067895   | 4.29146E-19 | 5.49495E-18 | UP     | CD1d molecule [Source:HGNC Symbol;Acc:HGNC:1637]                                                        | chr1  | 158179947 | 158184896 | 2253  |
| AC243829.1 | 0.989302697  | 4.43944E-19 | 5.68042E-18 | UP     |                                                                                                         | chr17 | 36183235  | 36196456  | 1386  |
| UGT1A1     | -1.403846016 | 4.75729E-19 | 6.07854E-18 | DOWN   | UDP glucuronosyltransferase family 1 member A1 [Source:HGNC Symbol;Acc:HGNC:12530]                      | chr2  | 23760248  | 23773299  | 4467  |
| BATF3      | 0.650623575  | 6.05828E-19 | 7.70285E-18 | UP     | basic leucine zipper ATF-like transcription factor 3 [Source:HGNC Symbol;Acc:HGNC:28915]                | chr1  | 212686418 | 212699985 | 980   |
| APOC1      | 0.857306651  | 7.07332E-19 | 8.95576E-18 | UP     | apolipoprotein C1 [Source:HGNC Symbol;Acc:HGNC:607]                                                     | chr19 | 44914247  | 44919346  | 841   |
| SMIM22     | -1.23002547  | 7.17682E-19 | 9.08045E-18 | DOWN   | small integral membrane protein 22 [Source:HGNC Symbol;Acc:HGNC:48329]                                  | chr16 | 4788397   | 4796491   | 1295  |
| LRK2       | 0.727790687  | 7.75279E-19 | 9.7751E-18  | UP     | leucine rich repeat kinase 2 [Source:HGNC Symbol;Acc:HGNC:18618]                                        | chr12 | 40225011  | 40369281  | 10063 |
| HIST1H4F   | 0.801420203  | 7.78392E-19 | 9.80752E-18 | UP     | histone cluster 1 H4 family member f [Source:HGNC Symbol;Acc:HGNC:4783]                                 | chr6  | 26240426  | 26240737  | 312   |
| MUC16      | 2.030668814  | 7.94037E-19 | 9.9977E-18  | UP     | mucin 16, cell surface associated [Source:HGNC Symbol;Acc:HGNC:15582]                                   | chr19 | 8848844   | 8891342   | 43816 |
| AL135818.1 | 0.717830104  | 8.74091E-19 | 1.0998E-17  | UP     |                                                                                                         | chr14 | 91242935  | 91252211  | 1740  |
| TNFSF14    | 0.836738469  | 8.75827E-19 | 1.10122E-17 | UP     | TNF superfamily member 14 [Source:HGNC Symbol;Acc:HGNC:11930]                                           | chr19 | 6661253   | 6670588   | 4778  |
| FBXO39     | 0.87030176   | 8.91609E-19 | 1.11951E-17 | UP     | F-box protein 39 [Source:HGNC Symbol;Acc:HGNC:28565]                                                    | chr17 | 6776223   | 6787646   | 1677  |
| SPIRE2     | -0.759159316 | 1.03275E-18 | 1.29315E-17 | DOWN   | spire type actin nucleation factor 2 [Source:HGNC Symbol;Acc:HGNC:30623]                                | chr16 | 89828499  | 89871319  | 4775  |
| SHH        | -1.512861651 | 1.12943E-18 | 1.41323E-17 | DOWN   | sonic hedgehog [Source:HGNC Symbol;Acc:HGNC:10848]                                                      | chr7  | 155799986 | 155812273 | 4454  |
| AC124319.4 | 0.630672449  | 1.16807E-18 | 1.46058E-17 | UP     |                                                                                                         | chr17 | 80339898  | 80342058  | 2161  |
| AMIGO2     | -0.764030498 | 1.32448E-18 | 1.65045E-17 | DOWN   | adhesion molecule with Ig like domain 2 [Source:HGNC Symbol;Acc:HGNC:24073]                             | chr12 | 47075707  | 47079951  | 3956  |
| UGT1A3     | -1.317405354 | 1.49237E-18 | 1.85584E-17 | DOWN   | UDP glucuronosyltransferase family 1 member A3 [Source:HGNC Symbol;Acc:HGNC:12535]                      | chr2  | 233729108 | 233773299 | 2364  |
| RAB33A     | 0.671625001  | 1.53971E-18 | 1.91078E-17 | UP     | RAB33A, member RAS oncogene family [Source:HGNC Symbol;Acc:HGNC:9773]                                   | chrX  | 130171649 | 130184700 | 1258  |
| CFAP54     | 0.80297873   | 1.55007E-18 | 1.92101E-17 | UP     | cilia and flagella associated protein 54 [Source:HGNC Symbol;Acc:HGNC:26456]                            | chr12 | 96489587  | 96875555  | 9766  |
| GPR15      | 1.096103844  | 1.79095E-18 | 2.21498E-17 | UP     | G protein-coupled receptor 15 [Source:HGNC Symbol;Acc:HGNC:4469]                                        | chr3  | 98531899  | 98533150  | 1252  |
| LINC00173  | 0.9458662    | 1.9857E-18  | 2.45084E-17 | UP     | long intergenic non-protein coding RNA 173 [Source:HGNC Symbol;Acc:HGNC:33791]                          | chr12 | 116533422 | 116536513 | 2004  |
| ZBTB88     | -1.108562165 | 2.06353E-18 | 2.54343E-17 | DOWN   | zinc finger and BTB domain containing 88 [Source:HGNC Symbol;Acc:HGNC:37057]                            | chr1  | 32465069  | 32496686  | 12834 |
| NLRP6      | 0.908381845  | 2.23825E-18 | 2.75691E-17 | UP     | NLR family pyrin domain containing 6 [Source:HGNC Symbol;Acc:HGNC:22944]                                | chr11 | 278365    | 285359    | 2939  |
| SGK2       | -0.994965629 | 2.25535E-18 | 2.77609E-17 | DOWN   | SGK2, serine/threonine kinase 2 [Source:HGNC Symbol;Acc:HGNC:13900]                                     | chr20 | 43558968  | 43585677  | 2935  |
| ASB2       | 0.758949158  | 2.45632E-18 | 3.01527E-17 | UP     | ankyrin repeat and SOCS box containing 2 [Source:HGNC Symbol;Acc:HGNC:16012]                            | chr14 | 93934153  | 93976791  | 3393  |
| ALKAL1     | -1.090485932 | 2.47769E-18 | 3.03944E-17 | DOWN   | ALK and LTK ligand 1 [Source:HGNC Symbol;Acc:HGNC:33775]                                                | chr8  | 52534037  | 52565507  | 1217  |
| UGT1A4     | -1.338352031 | 2.53439E-18 | 3.10689E-17 | DOWN   | UDP glucuronosyltransferase family 1 member A4 [Source:HGNC Symbol;Acc:HGNC:12536]                      | chr2  | 233718778 | 233773299 | 2388  |
| OSMR       | 0.59998741   | 2.59536E-18 | 3.17949E-17 | UP     | oncostatin M receptor [Source:HGNC Symbol;Acc:HGNC:8507]                                                | chr5  | 38845858  | 38935641  | 6147  |
| HLA-G      | 0.953743239  | 2.65583E-18 | 3.24699E-17 | UP     | major histocompatibility complex, class I, G [Source:HGNC Symbol;Acc:HGNC:4964]                         | chr6  | 29826967  | 29831125  | 1593  |
| TMPRSS2    | -1.276113043 | 3.24862E-18 | 3.95572E-17 | DOWN   | transmembrane protease, serine 2 [Source:HGNC Symbol;Acc:HGNC:11876]                                    | chr21 | 41464551  | 41508159  | 3321  |
| PLEKHG6    | -0.906541501 | 3.43167E-18 | 4.17021E-17 | DOWN   | pleckstrin homology and RhoGEF domain containing G6 [Source:HGNC Symbol;Acc:HGNC:25562]                 | chr12 | 6310436   | 6328506   | 4001  |
| MPP7       | -0.631550486 | 3.50039E-18 | 4.24804E-17 | DOWN   | membrane palmitoylated protein 7 [Source:HGNC Symbol;Acc:HGNC:26542]                                    | chr10 | 28050993  | 28282138  | 5209  |
| MAOA       | -0.864238494 | 3.53672E-18 | 4.28638E-17 | DOWN   | monoamine oxidase A [Source:HGNC Symbol;Acc:HGNC:6833]                                                  | chrX  | 43654907  | 43746824  | 5438  |
| CLEC17A    | 1.10067907   | 3.5697E-18  | 4.31999E-17 | UP     | C-type lectin domain containing 17A [Source:HGNC Symbol;Acc:HGNC:34520]                                 | chr19 | 14583084  | 14611157  | 2175  |
| OR52N4     | 1.02008915   | 3.57159E-18 | 4.31999E-17 | UP     | olfactory receptor family 52 subfamily N member 4 (gene/pseudogene) [Source:HGNC Symbol;Acc:HGNC:15230] | chr11 | 5754243   | 5755905   | 1276  |
| CHRNA6     | 0.879909247  | 4.11118E-18 | 4.9627E-17  | UP     | cholinergic receptor nicotinic alpha 6 subunit [Source:HGNC Symbol;Acc:HGNC:15963]                      | chr8  | 42752620  | 42768786  | 2400  |
| CYP3A5     | -1.294210753 | 4.88194E-18 | 5.87356E-17 | DOWN   | cytochrome P450 family 3 subfamily A member 5 [Source:HGNC Symbol;Acc:HGNC:2638]                        | chr7  | 99648194  | 99679998  | 3983  |
| FGFR3      | -1.134045322 | 5.76781E-18 | 6.89816E-17 | DOWN   | fibroblast growth factor receptor 3 [Source:HGNC Symbol;Acc:HGNC:3690]                                  | chr4  | 1793307   | 1808872   | 4446  |
| SCNN1B     | -1.275827387 | 6.19663E-18 | 7.40614E-17 | DOWN   | sodium channel epithelial 1 beta subunit [Source:HGNC Symbol;Acc:HGNC:10600]                            | chr16 | 23302270  | 23381299  | 2751  |
| P2RY14     | 0.732212183  | 7.28423E-18 | 8.68312E-17 | UP     | purinergic receptor P2Y14 [Source:HGNC Symbol;Acc:HGNC:16442]                                           | chr3  | 151212117 | 151278467 | 2763  |
| CCDC183    | -1.103307348 | 7.73738E-18 | 9.20515E-17 | DOWN   | coiled-coil domain containing 183 [Source:HGNC Symbol;Acc:HGNC:28236]                                   | chr9  | 136796363 | 136807721 | 1671  |
| GP1BA      | 1.215705263  | 7.91615E-18 | 9.41165E-17 | UP     | glycoprotein Ib platelet alpha subunit [Source:HGNC Symbol;Acc:HGNC:4439]                               | chr17 | 4932297   | 4935030   | 2501  |
| COL6A4P1   | -0.966410627 | 7.96445E-18 | 9.45668E-17 | DOWN   | collagen type VI alpha 4 pseudogene 1 [Source:HGNC Symbol;Acc:HGNC:33484]                               | chr3  | 15151833  | 15205959  | 4566  |
| IGKV2-40   | 1.18450862   | 9.33693E-18 | 1.10646E-16 | UP     | immunoglobulin kappa variable 2-40 [Source:HGNC Symbol;Acc:HGNC:5789]                                   | chr2  | 89330110  | 89330421  | 312   |

| PARAM      | logFC        | pval        | pval.adj    | UPDOWN | desc                                                                                                         | chr   | start     | end       | size  |
|------------|--------------|-------------|-------------|--------|--------------------------------------------------------------------------------------------------------------|-------|-----------|-----------|-------|
| CD44       | 0.628617344  | 9.53155E-18 | 1.12805E-16 | UP     | CD44 molecule (Indian blood group) [Source:HGNC Symbol;Acc:HGNC:1681]                                        | chr11 | 35138870  | 35232402  | 6129  |
| TMEM30B    | -0.748318194 | 9.9395E-18  | 1.1725E-16  | DOWN   | transmembrane protein 30B [Source:HGNC Symbol;Acc:HGNC:27254]                                                | chr14 | 61277730  | 61281840  | 4471  |
| SLCO5A1    | 0.847598127  | 1.0337E-17  | 1.21781E-16 | UP     | solute carrier organic anion transporter family member 5A1 [Source:HGNC Symbol;Acc:HGNC:19046]               | chr8  | 69667047  | 69835064  | 9297  |
| VIM-AS1    | 0.729352824  | 1.05139E-17 | 1.23784E-16 | UP     | VIM antisense RNA 1 [Source:HGNC Symbol;Acc:HGNC:44879]                                                      | chr10 | 17214239  | 17229985  | 1992  |
| C19orf38   | 0.597541567  | 1.05847E-17 | 1.24456E-16 | UP     | chromosome 19 open reading frame 38 [Source:HGNC Symbol;Acc:HGNC:34073]                                      | chr19 | 10836575  | 10869790  | 1419  |
| TBX3       | -0.852737388 | 1.07741E-17 | 1.26519E-16 | DOWN   | T-box 3 [Source:HGNC Symbol;Acc:HGNC:11602]                                                                  | chr12 | 114670254 | 114684164 | 4783  |
| GSTM2      | -0.845000658 | 1.0932E-17  | 1.2829E-16  | DOWN   | glutathione S-transferase mu 2 [Source:HGNC Symbol;Acc:HGNC:4634]                                            | chr1  | 109668022 | 109709549 | 4201  |
| CAMK2N1    | -0.722822246 | 1.17656E-17 | 1.37894E-16 | DOWN   | calcium/calmodulin dependent protein kinase II inhibitor 1 [Source:HGNC Symbol;Acc:HGNC:24190]               | chr1  | 20482391  | 20486220  | 2336  |
| LILRA1     | 0.740558691  | 1.31518E-17 | 1.53446E-16 | UP     | leukocyte immunoglobulin like receptor A1 [Source:HGNC Symbol;Acc:HGNC:6602]                                 | chr19 | 54593648  | 54602090  | 2925  |
| ZNF888     | -0.590607466 | 1.31819E-17 | 1.53698E-16 | DOWN   | zinc finger protein 888 [Source:HGNC Symbol;Acc:HGNC:38695]                                                  | chr19 | 52904417  | 52923481  | 4195  |
| MMP12      | 1.27521314   | 1.44937E-17 | 1.68669E-16 | UP     | matrix metalloproteinase 12 [Source:HGNC Symbol;Acc:HGNC:7158]                                               | chr11 | 102862736 | 102875034 | 1874  |
| MIAT       | 0.831256357  | 1.46489E-17 | 1.70365E-16 | UP     | myocardial infarction associated transcript (non-protein coding) [Source:HGNC Symbol;Acc:HGNC:33425]         | chr22 | 26657520  | 26676475  | 10143 |
| ID1        | -0.749100926 | 1.48211E-17 | 1.72037E-16 | DOWN   | inhibitor of DNA binding 1, HLH protein [Source:HGNC Symbol;Acc:HGNC:5360]                                   | chr20 | 31605283  | 31606515  | 1233  |
| CAMSAP3    | -0.676618491 | 1.5572E-17  | 1.80522E-16 | DOWN   | calmodulin regulated spectrin associated protein family member 3 [Source:HGNC Symbol;Acc:HGNC:29307]         | chr19 | 7595902   | 7618304   | 4179  |
| CCL2       | 0.709813843  | 1.66257E-17 | 1.92614E-16 | UP     | C-C motif chemokine ligand 2 [Source:HGNC Symbol;Acc:HGNC:10618]                                             | chr17 | 34255285  | 34257203  | 1123  |
| GCNT2      | 0.690387418  | 1.71808E-17 | 1.98791E-16 | UP     | glucosaminyl (N-acetyl) transferase 2, I-branching enzyme (I blood group) [Source:HGNC Symbol;Acc:HGNC:4204] | chr6  | 10492223  | 10629368  | 7661  |
| SEMA4G     | -0.811988407 | 1.80082E-17 | 2.08099E-16 | DOWN   | semaphorin 4G [Source:HGNC Symbol;Acc:HGNC:10735]                                                            | chr10 | 100972540 | 100985615 | 4389  |
| AL136982.1 | -0.917477507 | 1.96556E-17 | 2.26702E-16 | DOWN   |                                                                                                              | chr10 | 86992406  | 87010203  | 4560  |
| CCL23      | 0.944088379  | 2.02105E-17 | 2.32954E-16 | UP     | C-C motif chemokine ligand 23 [Source:HGNC Symbol;Acc:HGNC:10622]                                            | chr17 | 36013056  | 36017968  | 626   |
| AC245369.4 | 1.484072575  | 2.05533E-17 | 2.36605E-16 | UP     | immunoglobulin heavy variable 1-69-2 [Source:UniProtKB/Swiss-Prot;Acc:A0A0G2JMI3]                            | chr14 | 106737110 | 106737547 | 353   |
| ATP1A4     | -1.108950197 | 2.08002E-17 | 2.38991E-16 | DOWN   | ATPase Na <sup>+</sup> /K <sup>+</sup> transporting subunit alpha 4 [Source:HGNC Symbol;Acc:HGNC:14073]      | chr1  | 160151570 | 160186977 | 3947  |
| ATOH8      | -0.924680764 | 2.20206E-17 | 2.52694E-16 | DOWN   | atonal bHLH transcription factor 8 [Source:HGNC Symbol;Acc:HGNC:24126]                                       | chr2  | 85753894  | 85788066  | 2438  |
| C15orf48   | 0.97203841   | 2.35704E-17 | 2.70136E-16 | UP     | chromosome 15 open reading frame 48 [Source:HGNC Symbol;Acc:HGNC:29898]                                      | chr15 | 45430529  | 45433449  | 953   |
| AL355987.4 | -0.812346849 | 2.44926E-17 | 2.80351E-16 | DOWN   |                                                                                                              | chr9  | 136799223 | 136810035 | 4244  |
| FAM3B      | -1.249921958 | 2.89647E-17 | 3.30497E-16 | DOWN   | family with sequence similarity 3 member B [Source:HGNC Symbol;Acc:HGNC:1253]                                | chr21 | 41316734  | 41357431  | 1308  |
| PACRG      | -0.97096673  | 2.91164E-17 | 3.3199E-16  | DOWN   | parkin coregulated [Source:HGNC Symbol;Acc:HGNC:19152]                                                       | chr6  | 162727132 | 163315492 | 1858  |
| UGT1A5     | -1.265194003 | 2.91322E-17 | 3.3199E-16  | DOWN   | UDP glucuronosyltransferase family 1 member A5 [Source:HGNC Symbol;Acc:HGNC:12537]                           | chr2  | 233712992 | 233773299 | 2345  |
| TMEM97     | -0.731258976 | 2.96775E-17 | 3.37779E-16 | DOWN   | transmembrane protein 97 [Source:HGNC Symbol;Acc:HGNC:28106]                                                 | chr17 | 28319095  | 28328685  | 3034  |
| CKS1BP7    | -0.783633757 | 3.01154E-17 | 3.42549E-16 | DOWN   | CDC28 protein kinase regulatory subunit 1B pseudogene 7 [Source:HGNC Symbol;Acc:HGNC:1999]                   | chr8  | 80644939  | 80645173  | 235   |
| RP56KA6    | -0.89551229  | 3.01397E-17 | 3.4261E-16  | DOWN   | ribosomal protein S6 kinase A6 [Source:HGNC Symbol;Acc:HGNC:10435]                                           | chrX  | 84058346  | 84187907  | 8258  |
| CR2        | 1.3880374    | 3.0843E-17  | 3.50385E-16 | UP     | complement C3d receptor 2 [Source:HGNC Symbol;Acc:HGNC:2336]                                                 | chr1  | 207454230 | 207489895 | 4240  |
| PLEKHA3P1  | 0.621472834  | 3.21466E-17 | 3.64737E-16 | UP     | pleckstrin homology domain containing A3 pseudogene 1 [Source:HGNC Symbol;Acc:HGNC:19648]                    | chr19 | 41521043  | 41521989  | 894   |
| GAPT       | 0.796815021  | 3.47521E-17 | 3.93315E-16 | UP     | GRB2 binding adaptor protein, transmembrane [Source:HGNC Symbol;Acc:HGNC:26588]                              | chr5  | 58491435  | 58497090  | 3023  |
| SALL2      | -0.590263196 | 3.68616E-17 | 4.16669E-16 | DOWN   | spalt like transcription factor 2 [Source:HGNC Symbol;Acc:HGNC:10526]                                        | chr14 | 21521081  | 21537216  | 5382  |
| DCC        | 1.145236339  | 3.69326E-17 | 4.17212E-16 | UP     | DCC netrin 1 receptor [Source:HGNC Symbol;Acc:HGNC:2701]                                                     | chr18 | 52340172  | 53535903  | 10517 |
| HCAR1      | -1.11569534  | 3.8196E-17  | 4.30947E-16 | DOWN   | hydroxycarboxylic acid receptor 1 [Source:HGNC Symbol;Acc:HGNC:4532]                                         | chr12 | 122726076 | 122730843 | 4768  |
| ADAM28     | 0.615418692  | 4.03726E-17 | 4.54939E-16 | UP     | ADAM metalloproteinase domain 28 [Source:HGNC Symbol;Acc:HGNC:206]                                           | chr8  | 24294040  | 24359018  | 7531  |
| AXIN2      | -0.677428712 | 4.20308E-17 | 4.7333E-16  | DOWN   | axin 2 [Source:HGNC Symbol;Acc:HGNC:904]                                                                     | chr17 | 65528563  | 65561647  | 4632  |
| CNR2       | 0.918718526  | 5.35846E-17 | 6.00459E-16 | UP     | cannabinoid receptor 2 [Source:HGNC Symbol;Acc:HGNC:2160]                                                    | chr1  | 23870526  | 23913362  | 5254  |
| TTTC6      | -1.071325618 | 5.58296E-17 | 6.24843E-16 | DOWN   | tetratricopeptide repeat domain 6 [Source:HGNC Symbol;Acc:HGNC:19739]                                        | chr14 | 37622065  | 37842694  | 6252  |
| VMO1       | 0.717812919  | 5.71152E-17 | 6.38443E-16 | UP     | vitelline membrane outer layer 1 homolog [Source:HGNC Symbol;Acc:HGNC:30387]                                 | chr17 | 47852285  | 4786433   | 803   |
| SPSSB      | -1.254967046 | 5.87345E-17 | 6.5493E-16  | DOWN   | serine palmitoyltransferase small subunit B [Source:HGNC Symbol;Acc:HGNC:24045]                              | chr3  | 161344792 | 161372880 | 3242  |
| LINC01550  | 0.909515344  | 7.09607E-17 | 7.87868E-16 | UP     | long intergenic non-protein coding RNA 1550 [Source:HGNC Symbol;Acc:HGNC:20111]                              | chr14 | 97933662  | 97978110  | 4275  |
| NKD1       | -0.832416032 | 7.3007E-17  | 8.09596E-16 | DOWN   | naked cuticle homolog 1 [Source:HGNC Symbol;Acc:HGNC:17045]                                                  | chr16 | 50548330  | 50649249  | 17105 |
| GDF7       | -0.984682403 | 8.41942E-17 | 9.30808E-16 | DOWN   | growth differentiation factor 7 [Source:HGNC Symbol;Acc:HGNC:4222]                                           | chr2  | 20666664  | 20679245  | 9749  |
| CCL20      | 1.254602114  | 9.05823E-17 | 1.00021E-15 | UP     | C-C motif chemokine ligand 20 [Source:HGNC Symbol;Acc:HGNC:10619]                                            | chr2  | 227813842 | 227817564 | 842   |
| AC008040.2 | -0.871179765 | 9.57245E-17 | 1.05506E-15 | DOWN   |                                                                                                              | chr3  | 170062244 | 170062951 | 708   |
| C22orf34   | 0.74241736   | 1.02237E-16 | 1.12479E-15 | UP     | chromosome 22 open reading frame 34 [Source:HGNC Symbol;Acc:HGNC:28010]                                      | chr22 | 49414524  | 49657504  | 6015  |
| KIF19      | 0.86725057   | 1.03691E-16 | 1.13872E-15 | UP     | kinesin family member 19 [Source:HGNC Symbol;Acc:HGNC:26735]                                                 | chr17 | 74326212  | 74355820  | 3643  |
| UGT1A2P    | -1.243656773 | 1.06115E-16 | 1.16392E-15 | DOWN   | UDP glucuronosyltransferase family 1 member A2, pseudogene [Source:HGNC Symbol;Acc:HGNC:12534]               | chr2  | 233747214 | 233748079 | 866   |
| AKR1C2     | -1.432261976 | 1.13713E-16 | 1.24501E-15 | DOWN   | aldo-keto reductase family 1 member C2 [Source:HGNC Symbol;Acc:HGNC:385]                                     | chr10 | 4987400   | 5004023   | 4306  |
| PALM3      | -1.157777942 | 1.20962E-16 | 1.32198E-15 | DOWN   | paralemmin 3 [Source:HGNC Symbol;Acc:HGNC:33274]                                                             | chr19 | 14053365  | 14059159  | 2262  |
| CLDN4      | -0.849238141 | 1.24882E-16 | 1.36318E-15 | DOWN   | claudin 4 [Source:HGNC Symbol;Acc:HGNC:2046]                                                                 | chr7  | 73827744  | 73832693  | 4196  |
| INA        | -1.279154395 | 1.40228E-16 | 1.52702E-15 | DOWN   | intexin neuronal intermediate filament protein alpha [Source:HGNC Symbol;Acc:HGNC:6057]                      | chr10 | 103277163 | 103290351 | 3231  |
| NIPAL1     | -0.807701989 | 1.69438E-16 | 1.83627E-15 | DOWN   | NIPA like domain containing 1 [Source:HGNC Symbol;Acc:HGNC:27194]                                            | chr4  | 48016774  | 48040173  | 5300  |
| KLHDC7A    | -1.20148076  | 1.70319E-16 | 1.84472E-15 | DOWN   | kelch domain containing 7A [Source:HGNC Symbol;Acc:HGNC:26791]                                               | chr1  | 18480982  | 18486126  | 5145  |
| CD22       | 0.883322492  | 1.84712E-16 | 1.99583E-15 | UP     | CD22 molecule [Source:HGNC Symbol;Acc:HGNC:1643]                                                             | chr19 | 35329169  | 35347355  | 3289  |

| PARAM        | logFC        | pval        | pval.adj    | UPDOWN | desc                                                                                         | chr   | start     | end       | size  |
|--------------|--------------|-------------|-------------|--------|----------------------------------------------------------------------------------------------|-------|-----------|-----------|-------|
| TGM2         | 0.683767545  | 1.94331E-16 | 2.09602E-15 | UP     | transglutaminase 2 [Source:HGNC Symbol;Acc:HGNC:11778]                                       | chr20 | 38127387  | 38165372  | 5070  |
| HAS3         | -0.975649564 | 1.98299E-16 | 2.13628E-15 | DOWN   | hyaluronan synthase 3 [Source:HGNC Symbol;Acc:HGNC:4820]                                     | chr16 | 69105564  | 69118719  | 4869  |
| IGKV1OR2-108 | 1.070744603  | 1.99012E-16 | 2.14269E-15 | UP     | immunoglobulin kappa variable 1/OR2-108 (non-functional) [Source:HGNC Symbol;Acc:HGNC:5767]  | chr2  | 113406396 | 113406872 | 353   |
| TMPRSS3      | 1.039472404  | 1.99511E-16 | 2.14679E-15 | UP     | transmembrane protease, serine 3 [Source:HGNC Symbol;Acc:HGNC:11877]                         | chr21 | 42371890  | 42396846  | 3855  |
| PTPRU        | -0.617238491 | 2.0644E-16  | 2.21871E-15 | DOWN   | protein tyrosine phosphatase, receptor type U [Source:HGNC Symbol;Acc:HGNC:9683]             | chr1  | 29236516  | 29326813  | 5640  |
| BHLHA15      | 0.934496878  | 2.26962E-16 | 2.43494E-15 | UP     | basic helix-loop-helix family member a15 [Source:HGNC Symbol;Acc:HGNC:22265]                 | chr7  | 98211427  | 98212979  | 798   |
| PRR36        | -1.175415586 | 2.32085E-16 | 2.48696E-15 | DOWN   | proline rich 36 [Source:HGNC Symbol;Acc:HGNC:26172]                                          | chr19 | 7868719   | 7874379   | 4456  |
| SLC15A1      | -1.222371669 | 2.33909E-16 | 2.50354E-15 | DOWN   | solute carrier family 15 member 1 [Source:HGNC Symbol;Acc:HGNC:10920]                        | chr13 | 98683801  | 98752654  | 3106  |
| DAB1         | -1.111452641 | 2.36123E-16 | 2.52575E-15 | DOWN   | DAB1, reelin adaptor protein [Source:HGNC Symbol;Acc:HGNC:2661]                              | chr1  | 56994778  | 57424057  | 5688  |
| TNNC1        | -1.089755854 | 2.41686E-16 | 2.58373E-15 | DOWN   | troponin C1, slow skeletal and cardiac type [Source:HGNC Symbol;Acc:HGNC:11943]              | chr3  | 52451102  | 52454070  | 714   |
| ADORA3       | 0.614388192  | 2.4314E-16  | 2.59774E-15 | UP     | adenosine A3 receptor [Source:HGNC Symbol;Acc:HGNC:268]                                      | chr1  | 111499429 | 111503760 | 1948  |
| STK32A       | -1.227204348 | 2.49532E-16 | 2.66447E-15 | DOWN   | serine/threonine kinase 32A [Source:HGNC Symbol;Acc:HGNC:28317]                              | chr5  | 147234963 | 147387852 | 5529  |
| MSC          | 0.662775655  | 2.54682E-16 | 2.71626E-15 | UP     | musculin [Source:HGNC Symbol;Acc:HGNC:7321]                                                  | chr8  | 71841549  | 71844468  | 2023  |
| PTCHD1       | -1.17075092  | 2.66829E-16 | 2.84247E-15 | DOWN   | patched domain containing 1 [Source:HGNC Symbol;Acc:HGNC:26392]                              | chrX  | 23334016  | 23404372  | 13714 |
| SULT1A2      | -1.046192085 | 3.09615E-16 | 3.28667E-15 | DOWN   | sulfotransferase family 1A member 2 [Source:HGNC Symbol;Acc:HGNC:11454]                      | chr16 | 28591943  | 28597109  | 2275  |
| KRT86        | 1.026405563  | 3.13477E-16 | 3.32571E-15 | UP     | keratin 86 [Source:HGNC Symbol;Acc:HGNC:6463]                                                | chr12 | 52274675  | 52309163  | 2265  |
| AC011816.1   | 0.585277386  | 3.2029E-16  | 3.39204E-15 | UP     |                                                                                              | chr3  | 36880184  | 36880729  | 546   |
| SEMA5A       | -0.681906036 | 3.30251E-16 | 3.49142E-15 | DOWN   | semaphorin 5A [Source:HGNC Symbol;Acc:HGNC:10736]                                            | chr5  | 9035026   | 9546075   | 11762 |
| TNFSF4       | 0.64261012   | 3.57085E-16 | 3.76413E-15 | UP     | TNF superfamily member 4 [Source:HGNC Symbol;Acc:HGNC:11934]                                 | chr1  | 173183734 | 173207313 | 3719  |
| PDE9A        | -0.621372691 | 3.98121E-16 | 4.18696E-15 | DOWN   | phosphodiesterase 9A [Source:HGNC Symbol;Acc:HGNC:8795]                                      | chr21 | 42653750  | 42775509  | 2139  |
| SIGLEC12     | 0.936218603  | 4.08042E-16 | 4.28137E-15 | UP     | sialic acid binding Ig like lectin 12 (gene/pseudogene) [Source:HGNC Symbol;Acc:HGNC:15482]  | chr19 | 51491364  | 51501789  | 2194  |
| CDH26        | -0.882813592 | 4.18852E-16 | 4.38971E-15 | DOWN   | cadherin 26 [Source:HGNC Symbol;Acc:HGNC:15902]                                              | chr20 | 59958427  | 60014529  | 4823  |
| OSCAR        | 0.716663817  | 4.56389E-16 | 4.77208E-15 | UP     | osteoclast associated, immunoglobulin-like receptor [Source:HGNC Symbol;Acc:HGNC:29960]      | chr19 | 54094668  | 54102692  | 2084  |
| MYCL         | -0.847042117 | 4.74304E-16 | 4.95369E-15 | DOWN   | MYCL proto-oncogene, bHLH transcription factor [Source:HGNC Symbol;Acc:HGNC:7555]            | chr1  | 39895426  | 39902013  | 4947  |
| SMCO2        | 0.755021942  | 5.15015E-16 | 5.36652E-15 | UP     | single-pass membrane protein with coiled-coil domains 2 [Source:HGNC Symbol;Acc:HGNC:34448]  | chr12 | 27466810  | 27502185  | 1272  |
| LYPD6B       | -0.995348152 | 5.1975E-16  | 5.40964E-15 | DOWN   | LY6/PLAUR domain containing 6B [Source:HGNC Symbol;Acc:HGNC:27018]                           | chr2  | 149038467 | 149215262 | 1998  |
| VGLL1        | -1.238789949 | 5.20144E-16 | 5.41063E-15 | DOWN   | vestigial like family member 1 [Source:HGNC Symbol;Acc:HGNC:20985]                           | chrX  | 136532152 | 136568007 | 1215  |
| XCR1         | 0.862101003  | 5.21253E-16 | 5.41906E-15 | UP     | X-C motif chemokine receptor 1 [Source:HGNC Symbol;Acc:HGNC:1625]                            | chr3  | 46017024  | 46027742  | 5281  |
| ANKRD55      | 0.878047964  | 5.31743E-16 | 5.52495E-15 | UP     | ankyrin repeat domain 55 [Source:HGNC Symbol;Acc:HGNC:25681]                                 | chr5  | 56099678  | 56233359  | 2689  |
| FCN1         | 0.712089818  | 5.95883E-16 | 6.17016E-15 | UP     | ficolin 1 [Source:HGNC Symbol;Acc:HGNC:3623]                                                 | chr9  | 134905890 | 134917963 | 4981  |
| ELF5         | -1.239890829 | 6.02221E-16 | 6.23223E-15 | DOWN   | E74 like ETS transcription factor 5 [Source:HGNC Symbol;Acc:HGNC:3320]                       | chr11 | 34478793  | 34513805  | 4464  |
| OXGR1        | -1.040599345 | 6.23641E-16 | 6.43553E-15 | DOWN   | oxoglutarate receptor 1 [Source:HGNC Symbol;Acc:HGNC:4531]                                   | chr13 | 96985719  | 96994369  | 2390  |
| AL365436.1   | -0.682902307 | 7.03847E-16 | 7.23439E-15 | DOWN   |                                                                                              | chr1  | 151557446 | 151557940 | 495   |
| GLS2         | -0.869542504 | 7.37754E-16 | 7.5743E-15  | DOWN   | glutaminase 2 [Source:HGNC Symbol;Acc:HGNC:29570]                                            | chr12 | 56470944  | 56488414  | 2719  |
| FREM2        | -1.425463664 | 7.6199E-16  | 7.8187E-15  | DOWN   | FRAS1 related extracellular matrix protein 2 [Source:HGNC Symbol;Acc:HGNC:25396]             | chr13 | 38687129  | 38887131  | 16070 |
| UNC13C       | -1.471669192 | 7.65782E-16 | 7.85317E-15 | DOWN   | unc-13 homolog C [Source:HGNC Symbol;Acc:HGNC:23149]                                         | chr15 | 54012904  | 54633414  | 13049 |
| AC010487.1   | -0.671688909 | 8.49796E-16 | 8.69998E-15 | DOWN   |                                                                                              | chr19 | 52861807  | 52864151  | 1172  |
| CEACAM4      | 0.765874806  | 8.58395E-16 | 8.77809E-15 | UP     | carcinoembryonic antigen related cell adhesion molecule 4 [Source:HGNC Symbol;Acc:HGNC:1816] | chr19 | 41618971  | 41627074  | 1330  |
| ZNF737       | -0.683638027 | 8.59057E-16 | 8.77991E-15 | DOWN   | zinc finger protein 737 [Source:HGNC Symbol;Acc:HGNC:32468]                                  | chr19 | 20543431  | 20565809  | 3115  |
| SERPINA1     | 1.027009814  | 9.2699E-16  | 9.44759E-15 | UP     | serpin family A member 1 [Source:HGNC Symbol;Acc:HGNC:8941]                                  | chr14 | 94376747  | 94390693  | 4039  |
| MRC1         | 0.626053313  | 9.29822E-16 | 9.47113E-15 | UP     | mannose receptor C-type 1 [Source:HGNC Symbol;Acc:HGNC:7228]                                 | chr10 | 17809344  | 17911170  | 5198  |
| CAPN9        | -1.387610879 | 1.06693E-15 | 1.08433E-14 | DOWN   | calpain 9 [Source:HGNC Symbol;Acc:HGNC:1486]                                                 | chr1  | 230747384 | 230802003 | 2593  |
| OLR1         | 0.88696662   | 1.08625E-15 | 1.10273E-14 | UP     | oxidized low density lipoprotein receptor 1 [Source:HGNC Symbol;Acc:HGNC:8133]               | chr12 | 10158301  | 10172138  | 2484  |
| SNCG         | -0.947867083 | 1.25721E-15 | 1.27343E-14 | DOWN   | synuclein gamma [Source:HGNC Symbol;Acc:HGNC:11141]                                          | chr10 | 86958630  | 86963260  | 779   |
| AL691482.3   | -0.878009471 | 1.36778E-15 | 1.38157E-14 | DOWN   |                                                                                              | chr1  | 202011370 | 202015657 | 987   |
| HDAC1P2      | -0.686351103 | 1.48541E-15 | 1.49539E-14 | DOWN   | histone deacetylase 1 pseudogene 2 [Source:HGNC Symbol;Acc:HGNC:45191]                       | chr1  | 220625740 | 220628056 | 2006  |
| ACSBG1       | -1.136799351 | 1.55075E-15 | 1.55771E-14 | DOWN   | acyl-CoA synthetase bubblegum family member 1 [Source:HGNC Symbol;Acc:HGNC:29567]            | chr15 | 78167468  | 78245688  | 6777  |
| RG520        | 1.025116438  | 1.66628E-15 | 1.67191E-14 | UP     | regulator of G protein signaling 20 [Source:HGNC Symbol;Acc:HGNC:14600]                      | chr8  | 53851808  | 53959303  | 2317  |
| BEND4        | 0.948908442  | 1.78765E-15 | 1.78676E-14 | UP     | BEN domain containing 4 [Source:HGNC Symbol;Acc:HGNC:23815]                                  | chr4  | 42110938  | 42152878  | 8765  |
| LUZP2        | -1.089742573 | 2.06574E-15 | 2.05126E-14 | DOWN   | leucine zipper protein 2 [Source:HGNC Symbol;Acc:HGNC:23206]                                 | chr11 | 24497178  | 25082631  | 5109  |
| A2M-AS1      | 0.624632152  | 2.12995E-15 | 2.11143E-14 | UP     | A2M antisense RNA 1 (head to head) [Source:HGNC Symbol;Acc:HGNC:27057]                       | chr12 | 9065177   | 9068060   | 2192  |
| CMYA5        | -0.710586078 | 2.1458E-15  | 2.12598E-14 | DOWN   | cardiomyopathy associated 5 [Source:HGNC Symbol;Acc:HGNC:14305]                              | chr5  | 79689877  | 79800222  | 12847 |
| PIFO         | -0.859299152 | 2.20769E-15 | 2.18373E-14 | DOWN   | primary cilia formation [Source:HGNC Symbol;Acc:HGNC:27009]                                  | chr1  | 111346288 | 111353013 | 2627  |
| MAGIX        | -0.605193644 | 2.63469E-15 | 2.59617E-14 | DOWN   | MAGI family member, X-linked [Source:HGNC Symbol;Acc:HGNC:30006]                             | chrX  | 49162564  | 49168343  | 4166  |
| CXXC4        | -0.899046115 | 2.69398E-15 | 2.65315E-14 | DOWN   | CXXC finger protein 4 [Source:HGNC Symbol;Acc:HGNC:24593]                                    | chr4  | 104468312 | 104494894 | 5565  |
| OCLN         | -0.760267515 | 2.8309E-15  | 2.77894E-14 | DOWN   | occludin [Source:HGNC Symbol;Acc:HGNC:8104]                                                  | chr5  | 69492292  | 69558104  | 6549  |
| FBXO43       | 0.644655727  | 2.93321E-15 | 2.87626E-14 | UP     | F-box protein 43 [Source:HGNC Symbol;Acc:HGNC:28521]                                         | chr8  | 100133360 | 100145452 | 2886  |



| PARAM      | logFC        | pval        | pval.adj    | UPDOWN | desc                                                                                            | chr   | start     | end       | size  |
|------------|--------------|-------------|-------------|--------|-------------------------------------------------------------------------------------------------|-------|-----------|-----------|-------|
| PLEKHH1    | -0.622296384 | 2.95173E-15 | 2.89285E-14 | DOWN   | plekstrin homology, MyTH4 and FERM domain containing H1 [Source:HGNC Symbol;Acc:HGNC:17738]     | chr14 | 67533301  | 67589612  | 6604  |
| ELF3       | -0.863529039 | 2.9544E-15  | 2.8939E-14  | DOWN   | ET4 like ETS transcription factor 3 [Source:HGNC Symbol;Acc:HGNC:3318]                          | chr1  | 202007945 | 202017188 | 6173  |
| IL6        | 0.999796981  | 2.98556E-15 | 2.92285E-14 | UP     | interleukin 6 [Source:HGNC Symbol;Acc:HGNC:6018]                                                | chr7  | 22725884  | 22732002  | 1714  |
| UGT1A6     | -1.255064898 | 3.02599E-15 | 2.96083E-14 | DOWN   | UDP glucuronosyltransferase family 1 member A6 [Source:HGNC Symbol;Acc:HGNC:12538]              | chr2  | 233691607 | 233773300 | 2864  |
| RAB39B     | 0.741319226  | 3.09052E-15 | 3.02234E-14 | UP     | RAB39B, member RAS oncogene family [Source:HGNC Symbol;Acc:HGNC:16499]                          | chrX  | 155258241 | 155264589 | 3505  |
| ALDH1L1    | -1.083757427 | 3.8919E-15  | 3.77954E-14 | DOWN   | aldehyde dehydrogenase 1 family member L1 [Source:HGNC Symbol;Acc:HGNC:3978]                    | chr3  | 126103562 | 126181186 | 3718  |
| OVOL2      | -0.770749689 | 3.98638E-15 | 3.86095E-14 | DOWN   | ovo like zinc finger 2 [Source:HGNC Symbol;Acc:HGNC:15804]                                      | chr20 | 18024152  | 18057877  | 1555  |
| CNTN3      | -0.933752261 | 3.99749E-15 | 3.86965E-14 | DOWN   | contactin 3 [Source:HGNC Symbol;Acc:HGNC:2173]                                                  | chr3  | 74262568  | 74521140  | 4948  |
| GSTM3      | -0.833348398 | 4.01927E-15 | 3.88865E-14 | DOWN   | glutathione S-transferase mu 3 [Source:HGNC Symbol;Acc:HGNC:4635]                               | chr1  | 109733932 | 109741038 | 4216  |
| ANXA10     | -1.672554676 | 4.16288E-15 | 4.0233E-14  | DOWN   | annexin A10 [Source:HGNC Symbol;Acc:HGNC:534]                                                   | chr4  | 168092515 | 168187690 | 1417  |
| RNASE2     | 0.861677103  | 4.24137E-15 | 4.09698E-14 | UP     | ribonuclease A family member 2 [Source:HGNC Symbol;Acc:HGNC:10045]                              | chr14 | 20955452  | 20956436  | 755   |
| PNCK       | -1.112782921 | 4.39391E-15 | 4.23981E-14 | DOWN   | pregnancy up-regulated nonubiquitous CaM kinase [Source:HGNC Symbol;Acc:HGNC:13415]             | chrX  | 153669730 | 153674361 | 2258  |
| BCL11B     | 0.622665126  | 4.4065E-15  | 4.24969E-14 | UP     | B-cell CLL/lymphoma 11B [Source:HGNC Symbol;Acc:HGNC:13222]                                     | chr14 | 99169287  | 99271524  | 7855  |
| PDE10A     | -0.720975158 | 5.07613E-15 | 4.87475E-14 | DOWN   | phosphodiesterase 10A [Source:HGNC Symbol;Acc:HGNC:8772]                                        | chr6  | 165327287 | 165662554 | 10197 |
| LYPD5      | 0.657101231  | 5.26456E-15 | 5.05303E-14 | UP     | LY6/PLAUR domain containing 5 [Source:HGNC Symbol;Acc:HGNC:26397]                               | chr19 | 43795929  | 43820634  | 2789  |
| EVPL       | -0.862305906 | 5.27065E-15 | 5.0562E-14  | DOWN   | envoplakin [Source:HGNC Symbol;Acc:HGNC:3503]                                                   | chr17 | 76006845  | 76027452  | 6680  |
| GBP6       | 1.246117056  | 5.46365E-15 | 5.2358E-14  | UP     | guanylate binding protein family member 6 [Source:HGNC Symbol;Acc:HGNC:25395]                   | chr1  | 89364058  | 89386461  | 2987  |
| ERICH5     | -0.982503618 | 6.0906E-15  | 5.82737E-14 | DOWN   | glutamate rich 5 [Source:HGNC Symbol;Acc:HGNC:26823]                                            | chr8  | 98064311  | 98093610  | 1761  |
| MACROD2    | -0.677872796 | 6.86514E-15 | 6.56151E-14 | DOWN   | MACRO domain containing 2 [Source:HGNC Symbol;Acc:HGNC:16126]                                   | chr20 | 13995369  | 16053197  | 5415  |
| MUC2       | -1.554376584 | 7.69337E-15 | 7.34537E-14 | DOWN   | mucin 2, oligomeric mucus/gel-forming [Source:HGNC Symbol;Acc:HGNC:7512]                        | chr11 | 1094474   | 1099340   | 4845  |
| HIST3H2BA  | 0.855023677  | 7.88138E-15 | 7.513E-14   | UP     | histone cluster 3 H2B family member a (pseudogene) [Source:HGNC Symbol;Acc:HGNC:20515]          | chr1  | 228464103 | 228464626 | 524   |
| FM05       | -0.814630941 | 8.10741E-15 | 7.7244E-14  | DOWN   | flavin containing monooxygenase 5 [Source:HGNC Symbol;Acc:HGNC:3773]                            | chr1  | 147184305 | 147225638 | 3178  |
| CCL22      | 0.802684865  | 8.35246E-15 | 7.94821E-14 | UP     | C-C motif chemokine ligand 22 [Source:HGNC Symbol;Acc:HGNC:10621]                               | chr16 | 57358772  | 57366190  | 2929  |
| AC139769.1 | -0.825652725 | 8.68934E-15 | 8.24419E-14 | DOWN   |                                                                                                 | chr19 | 23762944  | 23833314  | 2122  |
| AP002026.1 | -0.73012782  | 9.1103E-15  | 8.62552E-14 | DOWN   |                                                                                                 | chr4  | 99088857  | 99301356  | 6562  |
| POF1B      | -1.125774002 | 9.24022E-15 | 8.73941E-14 | DOWN   | premature ovarian failure, 1B [Source:HGNC Symbol;Acc:HGNC:13711]                               | chrX  | 85277396  | 85379743  | 4029  |
| NIPAL4     | -1.038388405 | 9.3772E-15  | 8.86434E-14 | DOWN   | NIPA like domain containing 4 [Source:HGNC Symbol;Acc:HGNC:28018]                               | chr5  | 157460019 | 157474717 | 3274  |
| FUT9       | -1.132668625 | 9.39511E-15 | 8.87664E-14 | DOWN   | fucosyltransferase 9 [Source:HGNC Symbol;Acc:HGNC:4020]                                         | chr6  | 96015984  | 96215612  | 12783 |
| S100A9     | 1.033744643  | 1.15934E-14 | 1.08968E-13 | UP     | S100 calcium binding protein A9 [Source:HGNC Symbol;Acc:HGNC:10499]                             | chr1  | 153357854 | 153361027 | 577   |
| ALS92114.1 | -0.778435495 | 1.2132E-14  | 1.13854E-13 | DOWN   |                                                                                                 | chr1  | 204346776 | 204347258 | 483   |
| SPHK1      | 0.605205103  | 1.24272E-14 | 1.16503E-13 | UP     | sphingosine kinase 1 [Source:HGNC Symbol;Acc:HGNC:11240]                                        | chr17 | 76376661  | 76387860  | 3000  |
| C1orf226   | -0.673719843 | 1.2505E-14  | 1.17172E-13 | DOWN   | chromosome 1 open reading frame 226 [Source:HGNC Symbol;Acc:HGNC:34351]                         | chr1  | 162378841 | 162386818 | 4317  |
| TMEM171    | 0.923288661  | 1.38753E-14 | 1.2961E-13  | UP     | transmembrane protein 171 [Source:HGNC Symbol;Acc:HGNC:27031]                                   | chr5  | 73120292  | 73131817  | 1535  |
| PRR15      | -0.916111185 | 1.40516E-14 | 1.31122E-13 | DOWN   | proline rich 15 [Source:HGNC Symbol;Acc:HGNC:22310]                                             | chr7  | 29563811  | 29567295  | 1678  |
| CXCL1      | 0.909347569  | 1.43903E-14 | 1.34144E-13 | UP     | C-X-C motif chemokine ligand 1 [Source:HGNC Symbol;Acc:HGNC:4602]                               | chr4  | 73869404  | 73871242  | 1097  |
| ITGA9-AS1  | -0.586454967 | 1.63162E-14 | 1.51475E-13 | DOWN   | ITGA9 antisense RNA 1 [Source:HGNC Symbol;Acc:HGNC:49668]                                       | chr3  | 37745432  | 37861780  | 3560  |
| DUOX1      | -0.921584296 | 1.63581E-14 | 1.51785E-13 | DOWN   | dual oxidase maturation factor 1 [Source:HGNC Symbol;Acc:HGNC:26507]                            | chr15 | 45117367  | 45129877  | 3288  |
| CFB        | 0.793621385  | 1.76153E-14 | 1.63283E-13 | UP     | complement factor B [Source:HGNC Symbol;Acc:HGNC:1037]                                          | chr6  | 31945709  | 31952084  | 2862  |
| MUM1L1     | -0.969242751 | 1.78688E-14 | 1.65464E-13 | DOWN   | MUM1 like 1 [Source:HGNC Symbol;Acc:HGNC:26583]                                                 | chrX  | 106168305 | 106208956 | 4343  |
| RAB25      | -0.935395623 | 1.83548E-14 | 1.69843E-13 | DOWN   | RAB25, member RAS oncogene family [Source:HGNC Symbol;Acc:HGNC:18238]                           | chr1  | 156061160 | 156070514 | 1110  |
| CHP2       | -1.276950056 | 1.88696E-14 | 1.74287E-13 | DOWN   | calcineurin like EF-hand protein 2 [Source:HGNC Symbol;Acc:HGNC:24927]                          | chr16 | 23754627  | 23758951  | 2382  |
| VWASB1     | -1.22830674  | 2.09768E-14 | 1.93159E-13 | DOWN   | von Willebrand factor A domain containing 5B1 [Source:HGNC Symbol;Acc:HGNC:26538]               | chr1  | 20290919  | 20354894  | 4493  |
| GRAMD1B    | 0.602049562  | 2.19826E-14 | 2.01806E-13 | UP     | GRAM domain containing 1B [Source:HGNC Symbol;Acc:HGNC:29214]                                   | chr11 | 123358428 | 123627774 | 11027 |
| FM01       | 0.985812542  | 2.29433E-14 | 2.102E-13   | UP     | flavin containing monooxygenase 1 [Source:HGNC Symbol;Acc:HGNC:3769]                            | chr1  | 171248471 | 171285978 | 2317  |
| DRD1       | -0.985638197 | 2.30199E-14 | 2.10795E-13 | DOWN   | dopamine receptor D1 [Source:HGNC Symbol;Acc:HGNC:3020]                                         | chr5  | 175440039 | 175444208 | 4054  |
| BHMT       | -1.519904678 | 2.37181E-14 | 2.16641E-13 | DOWN   | betaine-homocysteine S-methyltransferase [Source:HGNC Symbol;Acc:HGNC:1047]                     | chr5  | 79111779  | 79132290  | 2502  |
| SYT16      | -0.997287086 | 2.50579E-14 | 2.28304E-13 | DOWN   | synaptotagmin 16 [Source:HGNC Symbol;Acc:HGNC:23142]                                            | chr14 | 61995823  | 62112550  | 14060 |
| CXorf57    | -0.76537321  | 2.55098E-14 | 2.31955E-13 | DOWN   | chromosome X open reading frame 57 [Source:HGNC Symbol;Acc:HGNC:25486]                          | chrX  | 106611930 | 106679442 | 3903  |
| OR7E14P    | -0.741193996 | 2.55739E-14 | 2.32421E-13 | DOWN   | olfactory receptor family 7 subfamily E member 14 pseudogene [Source:HGNC Symbol;Acc:HGNC:8385] | chr11 | 17013998  | 17053024  | 1370  |
| IGLV1-41   | 1.130706395  | 2.6379E-14  | 2.39618E-13 | UP     | immunoglobulin lambda variable 1-41 (pseudogene) [Source:HGNC Symbol;Acc:HGNC:5878]             | chr22 | 22404207  | 22404721  | 406   |
| CYP4F12    | -0.983994527 | 2.66557E-14 | 2.41889E-13 | DOWN   | cytochrome P450 family 4 subfamily F member 12 [Source:HGNC Symbol;Acc:HGNC:18857]              | chr19 | 15672757  | 15697174  | 2095  |
| R1MKLA     | -0.888221702 | 2.72611E-14 | 2.47259E-13 | DOWN   | ribosomal modification protein rimK like family member A [Source:HGNC Symbol;Acc:HGNC:28725]    | chr1  | 42380806  | 42422578  | 8909  |
| SRPK3      | -0.779980753 | 2.76292E-14 | 2.50473E-13 | DOWN   | SRSF protein kinase 3 [Source:HGNC Symbol;Acc:HGNC:11402]                                       | chrX  | 153776412 | 153785732 | 4628  |
| SHC2       | -0.587513813 | 2.85359E-14 | 2.58434E-13 | DOWN   | SHC adaptor protein 2 [Source:HGNC Symbol;Acc:HGNC:29869]                                       | chr19 | 416583    | 460996    | 2494  |
| RAPGEFL1   | -0.684235458 | 2.89304E-14 | 2.61435E-13 | DOWN   | Rap guanine nucleotide exchange factor like 1 [Source:HGNC Symbol;Acc:HGNC:17428]               | chr17 | 40177010  | 40195656  | 4132  |
| ACY3       | 1.017597024  | 2.97311E-14 | 2.68186E-13 | UP     | aminoacylase 3 [Source:HGNC Symbol;Acc:HGNC:24104]                                              | chr11 | 67642555  | 67650659  | 1300  |
| GPC3       | -0.842168123 | 3.06877E-14 | 2.76677E-13 | DOWN   | glypican 3 [Source:HGNC Symbol;Acc:HGNC:4451]                                                   | chrX  | 133535745 | 133985895 | 2637  |

| PARAM     | logFC        | pval        | pval.adj    | UPDOWN | desc                                                                                         | chr   | start     | end       | size  |
|-----------|--------------|-------------|-------------|--------|----------------------------------------------------------------------------------------------|-------|-----------|-----------|-------|
| GATA2     | -0.654623114 | 3.10024E-14 | 2.79376E-13 | DOWN   | GATA binding protein 2 [Source:HGNC Symbol;Acc:HGNC:4171]                                    | chr3  | 128479427 | 128493185 | 3757  |
| BTBD6P1   | 0.853520205  | 3.15245E-14 | 2.8394E-13  | UP     | BTB domain containing 6 pseudogene 1 [Source:HGNC Symbol;Acc:HGNC:51542]                     | chr1  | 23901471  | 23902737  | 1267  |
| PLD4      | 0.784852967  | 3.17525E-14 | 2.85852E-13 | UP     | phospholipase D family member 4 [Source:HGNC Symbol;Acc:HGNC:23792]                          | chr14 | 104924816 | 104937790 | 6641  |
| IGF2BP3   | 1.299766003  | 3.31948E-14 | 2.98095E-13 | UP     | insulin like growth factor 2 mRNA binding protein 3 [Source:HGNC Symbol;Acc:HGNC:28868]      | chr7  | 23310209  | 23470467  | 4250  |
| NLRP7     | 1.10749353   | 3.36881E-14 | 3.02226E-13 | UP     | NLR family pyrin domain containing 7 [Source:HGNC Symbol;Acc:HGNC:22947]                     | chr19 | 54923509  | 54966243  | 3834  |
| PADI3     | -1.300854663 | 3.8282E-14  | 3.42254E-13 | DOWN   | peptidyl arginine deiminase 3 [Source:HGNC Symbol;Acc:HGNC:18337]                            | chr1  | 17249098  | 17284233  | 3189  |
| MYH6      | 0.98419504   | 3.86461E-14 | 3.45168E-13 | UP     | myosin heavy chain 6 [Source:HGNC Symbol;Acc:HGNC:7576]                                      | chr14 | 23381990  | 23408277  | 5941  |
| DAZL      | 0.933128156  | 4.55207E-14 | 4.04775E-13 | UP     | deleted in azoospermia like [Source:HGNC Symbol;Acc:HGNC:2685]                               | chr3  | 16586792  | 16605499  | 3401  |
| PLA1A     | 0.759790554  | 4.59822E-14 | 4.08678E-13 | UP     | phospholipase A1 member A [Source:HGNC Symbol;Acc:HGNC:17661]                                | chr3  | 119597842 | 119629811 | 1920  |
| HLA-J     | 0.633203888  | 4.63696E-14 | 4.11717E-13 | UP     | major histocompatibility complex, class I, J (pseudogene) [Source:HGNC Symbol;Acc:HGNC:4967] | chr6  | 30005971  | 30009956  | 1946  |
| EEF1A2    | -1.345843349 | 4.66425E-14 | 4.13735E-13 | DOWN   | eukaryotic translation elongation factor 1 alpha 2 [Source:HGNC Symbol;Acc:HGNC:3192]        | chr20 | 63488013  | 63499315  | 2006  |
| TESC      | -0.972192941 | 4.75343E-14 | 4.21028E-13 | DOWN   | tescalcin [Source:HGNC Symbol;Acc:HGNC:26065]                                                | chr12 | 117038924 | 117099469 | 1041  |
| SLC74A    | -1.018391283 | 4.8054E-14  | 4.25008E-13 | DOWN   | solute carrier family 7 member 4 [Source:HGNC Symbol;Acc:HGNC:11062]                         | chr22 | 21028718  | 21032558  | 2316  |
| TH        | -1.14315903  | 4.91005E-14 | 4.33629E-13 | DOWN   | tyrosine hydroxylase [Source:HGNC Symbol;Acc:HGNC:11782]                                     | chr11 | 2163929   | 2171877   | 1982  |
| MTUS2     | -0.9734363   | 5.02502E-14 | 4.43135E-13 | DOWN   | microtubule associated scaffold protein 2 [Source:HGNC Symbol;Acc:HGNC:20595]                | chr13 | 28820348  | 29505947  | 7700  |
| ZNF662    | -0.597835573 | 5.10073E-14 | 4.49594E-13 | DOWN   | zinc finger protein 662 [Source:HGNC Symbol;Acc:HGNC:31930]                                  | chr3  | 42905731  | 42917641  | 4372  |
| SYT7      | -0.814205365 | 5.11265E-14 | 4.50206E-13 | DOWN   | synaptotagmin 7 [Source:HGNC Symbol;Acc:HGNC:11514]                                          | chr11 | 61515313  | 61581148  | 5703  |
| TICAM2    | 0.605685914  | 5.36703E-14 | 4.72148E-13 | UP     | toll like receptor adaptor molecule 2 [Source:HGNC Symbol;Acc:HGNC:21354]                    | chr5  | 115578650 | 115602479 | 3049  |
| FCLA      | 0.90368493   | 5.49066E-14 | 4.82789E-13 | UP     | Fc receptor like A [Source:HGNC Symbol;Acc:HGNC:18504]                                       | chr1  | 161706972 | 161714351 | 2362  |
| FAM129C   | 0.909975257  | 5.62322E-14 | 4.94205E-13 | UP     | family with sequence similarity 129 member C [Source:HGNC Symbol;Acc:HGNC:24130]             | chr19 | 17523301  | 17553839  | 3068  |
| VPREB3    | 0.919101493  | 5.72979E-14 | 5.03327E-13 | UP     | V-set pre-B cell surrogate light chain 3 [Source:HGNC Symbol;Acc:HGNC:12710]                 | chr22 | 23752243  | 23754468  | 610   |
| AMZ1      | 0.833695182  | 5.7854E-14  | 5.07721E-13 | UP     | archaelysin family metallopeptidase 1 [Source:HGNC Symbol;Acc:HGNC:22231]                    | chr7  | 26795277  | 2716529   | 5611  |
| RP15P9    | -0.769753777 | 5.95712E-14 | 5.21781E-13 | DOWN   | ribosomal protein L5 pseudogene 9 [Source:HGNC Symbol;Acc:HGNC:36557]                        | chr2  | 110967834 | 110968719 | 886   |
| CACNA1H   | -0.617379764 | 6.33335E-14 | 5.54198E-13 | DOWN   | calcium voltage-gated channel subunit alpha1 H [Source:HGNC Symbol;Acc:HGNC:1395]            | chr16 | 1153121   | 1221772   | 8209  |
| RCOR2     | -0.687980227 | 6.98573E-14 | 6.0952E-13  | DOWN   | REST corepressor 2 [Source:HGNC Symbol;Acc:HGNC:27455]                                       | chr11 | 63911221  | 63916844  | 2604  |
| C2orf15   | -0.628772808 | 7.37849E-14 | 6.41628E-13 | DOWN   | chromosome 2 open reading frame 15 [Source:HGNC Symbol;Acc:HGNC:28436]                       | chr2  | 99141485  | 99151487  | 1763  |
| SLC30A2   | -1.216198803 | 7.4758E-14  | 6.49778E-13 | DOWN   | solute carrier family 30 member 2 [Source:HGNC Symbol;Acc:HGNC:11013]                        | chr1  | 26037252  | 26046133  | 3264  |
| NKAIN2    | -1.039796039 | 7.78655E-14 | 6.75493E-13 | DOWN   | sodium/potassium transporting ATPase interacting 2 [Source:HGNC Symbol;Acc:HGNC:16443]       | chr6  | 123804141 | 124825657 | 3796  |
| REEP6     | -0.766580707 | 8.16071E-14 | 7.06599E-13 | DOWN   | receptor accessory protein 6 [Source:HGNC Symbol;Acc:HGNC:30078]                             | chr19 | 1490747   | 1497927   | 1794  |
| NPAP1     | -1.149015888 | 8.18435E-14 | 7.08308E-13 | DOWN   | nuclear pore associated protein 1 [Source:HGNC Symbol;Acc:HGNC:1190]                         | chr15 | 24675868  | 24683393  | 7526  |
| AP1M2     | -0.743815279 | 9.0722E-14  | 7.82531E-13 | DOWN   | adaptor related protein complex 1 mu 2 subunit [Source:HGNC Symbol;Acc:HGNC:558]             | chr19 | 10572671  | 10587315  | 1757  |
| GTSF1     | 1.113957977  | 9.11945E-14 | 7.86233E-13 | UP     | gametocyte specific factor 1 [Source:HGNC Symbol;Acc:HGNC:26565]                             | chr12 | 54455954  | 54473599  | 1675  |
| Z97634.1  | -0.633103405 | 9.6807E-14  | 8.32641E-13 | DOWN   |                                                                                              | chr16 | 382097    | 392960    | 2186  |
| PRELID1P4 | -0.596623544 | 9.70375E-14 | 8.34228E-13 | DOWN   | PREL domain containing 1 pseudogene 4 [Source:HGNC Symbol;Acc:HGNC:43889]                    | chr15 | 35121573  | 35122084  | 512   |
| DISP2     | -0.781636974 | 1.17748E-13 | 1.00655E-12 | DOWN   | dispatched RND transporter family member 2 [Source:HGNC Symbol;Acc:HGNC:19712]               | chr15 | 40358235  | 40378639  | 12614 |
| EMBP1     | 0.753408509  | 1.23461E-13 | 1.05389E-12 | UP     | embigin pseudogene 1 [Source:HGNC Symbol;Acc:HGNC:38661]                                     | chr1  | 121519112 | 121571892 | 4235  |
| PDE6G     | 0.674262059  | 1.30447E-13 | 1.11196E-12 | UP     | phosphodiesterase 6G [Source:HGNC Symbol;Acc:HGNC:8789]                                      | chr17 | 81650459  | 81663112  | 1583  |
| HXB85     | -0.823263493 | 1.30574E-13 | 1.11252E-12 | DOWN   | homeobox B5 [Source:HGNC Symbol;Acc:HGNC:5116]                                               | chr17 | 48591257  | 48593961  | 2041  |
| TXLNB     | 0.615282562  | 1.36627E-13 | 1.163E-12   | UP     | taxilin beta [Source:HGNC Symbol;Acc:HGNC:21617]                                             | chr6  | 139240061 | 139292139 | 4753  |
| DUSP27    | -1.189055051 | 1.37312E-13 | 1.16828E-12 | DOWN   | dual specificity phosphatase 27 (putative) [Source:HGNC Symbol;Acc:HGNC:25034]               | chr1  | 167094045 | 167129165 | 4304  |
| CD1B      | 0.819594596  | 1.47136E-13 | 1.25127E-12 | UP     | CD1b molecule [Source:HGNC Symbol;Acc:HGNC:1635]                                             | chr1  | 158327951 | 158331531 | 1395  |
| FOXA1     | -1.086090681 | 1.49354E-13 | 1.26836E-12 | DOWN   | forkhead box A1 [Source:HGNC Symbol;Acc:HGNC:5021]                                           | chr14 | 37589984  | 37595034  | 2862  |
| SLC24A4   | 0.68223087   | 1.53089E-13 | 1.29885E-12 | UP     | solute carrier family 24 member 4 [Source:HGNC Symbol;Acc:HGNC:10978]                        | chr14 | 92322581  | 92501483  | 10078 |
| FLRT3     | -0.870609726 | 1.54823E-13 | 1.31234E-12 | DOWN   | fibronectin leucine rich transmembrane protein 3 [Source:HGNC Symbol;Acc:HGNC:3762]          | chr20 | 14322988  | 14337616  | 4978  |
| MAB21L3   | -0.932197615 | 1.62645E-13 | 1.37415E-12 | DOWN   | mab-21 like 3 [Source:HGNC Symbol;Acc:HGNC:26787]                                            | chr1  | 116111755 | 116135240 | 3229  |
| CCDC73    | 0.731561754  | 1.64315E-13 | 1.38761E-12 | UP     | coiled-coil domain containing 73 [Source:HGNC Symbol;Acc:HGNC:23261]                         | chr11 | 32602246  | 32794641  | 7786  |
| MUC20     | -0.726079656 | 1.70785E-13 | 1.43957E-12 | DOWN   | mucin 20, cell surface associated [Source:HGNC Symbol;Acc:HGNC:23282]                        | chr3  | 195720882 | 195735033 | 3322  |
| BSN       | -0.60616951  | 1.72236E-13 | 1.45045E-12 | DOWN   | basoon presynaptic cytomatrix protein [Source:HGNC Symbol;Acc:HGNC:1117]                     | chr3  | 49554489  | 49671545  | 15955 |
| EPPK1     | -0.714551687 | 1.8546E-13  | 1.55964E-12 | DOWN   | epiplakin 1 [Source:HGNC Symbol;Acc:HGNC:15577]                                              | chr8  | 143857324 | 143878464 | 16002 |
| KLRF1     | 0.714634717  | 1.91269E-13 | 1.60551E-12 | UP     | killer cell lectin like receptor F1 [Source:HGNC Symbol;Acc:HGNC:13342]                      | chr12 | 9827481   | 9845007   | 1241  |
| IGDCC3    | -1.000309169 | 2.07024E-13 | 1.73374E-12 | DOWN   | immunoglobulin superfamily DCC subclass member 3 [Source:HGNC Symbol;Acc:HGNC:9700]          | chr15 | 65327127  | 65378040  | 4479  |
| L1CAM     | 1.021237144  | 2.14349E-13 | 1.7926E-12  | UP     | L1 cell adhesion molecule [Source:HGNC Symbol;Acc:HGNC:6470]                                 | chrX  | 153861514 | 153886154 | 5121  |
| LYPD6     | -0.780316489 | 2.18502E-13 | 1.82565E-12 | DOWN   | LY6/PLAUR domain containing 6 [Source:HGNC Symbol;Acc:HGNC:28751]                            | chr2  | 149329985 | 149474148 | 4289  |
| KRT12     | -1.057775904 | 2.24145E-13 | 1.87107E-12 | DOWN   | keratin 12 [Source:HGNC Symbol;Acc:HGNC:6414]                                                | chr17 | 408613003 | 40867210  | 1867  |
| MYT1      | -1.338577071 | 2.2604E-13  | 1.88602E-12 | DOWN   | myelin transcription factor 1 [Source:HGNC Symbol;Acc:HGNC:7622]                             | chr20 | 64151791  | 64242253  | 5867  |
| FCGR3B    | 0.888937742  | 2.46974E-13 | 2.05313E-12 | UP     | Fc fragment of IgG receptor IIIb [Source:HGNC Symbol;Acc:HGNC:3620]                          | chr1  | 161623196 | 161631963 | 2741  |
| PP14571   | -0.986806131 | 2.50238E-13 | 2.07931E-12 | DOWN   | uncharacterized LOC100130449 [Source:NCBI gene;Acc:100130449]                                | chr2  | 240449418 | 240456714 | 2032  |



| PARAM      | logFC        | pval        | pval.adj    | UPDOWN | desc                                                                                                  | chr   | start      | end       | size  |
|------------|--------------|-------------|-------------|--------|-------------------------------------------------------------------------------------------------------|-------|------------|-----------|-------|
| EPB41L4B   | -0.636981447 | 2.57988E-13 | 2.14273E-12 | DOWN   | erythrocyte membrane protein band 4.1 like 4B [Source:HGNC Symbol;Acc:HGNC:19818]                     | chr9  | 109171975  | 109320964 | 7879  |
| PCDHB19P   | -0.625797869 | 2.65778E-13 | 2.2044E-12  | DOWN   | protocadherin beta 19 pseudogene [Source:HGNC Symbol;Acc:HGNC:14549]                                  | chr5  | 1412339923 | 141243034 | 3112  |
| POU5F1B    | -0.761152979 | 2.76727E-13 | 2.29312E-12 | DOWN   | POU class 5 homeobox 1B [Source:HGNC Symbol;Acc:HGNC:9223]                                            | chr8  | 127414290  | 127420069 | 5360  |
| AL023284.2 | -0.61409331  | 2.78585E-13 | 2.30746E-12 | DOWN   |                                                                                                       | chr6  | 136419847  | 136420425 | 579   |
| MPPED2     | -0.756902402 | 2.83125E-13 | 2.34186E-12 | DOWN   | metallophosphoesterase domain containing 2 [Source:HGNC Symbol;Acc:HGNC:1180]                         | chr11 | 30384493   | 30586281  | 7109  |
| FER1L4     | -0.79894393  | 2.83792E-13 | 2.3463E-12  | DOWN   | fer-1 like family member 4, pseudogene [Source:HGNC Symbol;Acc:HGNC:15801]                            | chr20 | 35558737   | 35607562  | 7658  |
| BNC1       | 1.568905437  | 2.89809E-13 | 2.39495E-12 | UP     | basonuclin 1 [Source:HGNC Symbol;Acc:HGNC:1081]                                                       | chr15 | 83255903   | 83284714  | 4795  |
| HSD11B2    | -0.684702643 | 3.32598E-13 | 2.74106E-12 | DOWN   | hydroxysteroid 11-beta dehydrogenase 2 [Source:HGNC Symbol;Acc:HGNC:5209]                             | chr16 | 67431117   | 67437553  | 1900  |
| FCAR       | 0.81969568   | 3.41224E-13 | 2.80577E-12 | UP     | Fc fragment of IgA receptor [Source:HGNC Symbol;Acc:HGNC:3608]                                        | chr19 | 54874248   | 54890472  | 2288  |
| CD300E     | 0.738875506  | 3.53557E-13 | 2.90324E-12 | UP     | CD300e molecule [Source:HGNC Symbol;Acc:HGNC:28874]                                                   | chr17 | 74609887   | 74623738  | 3501  |
| POU5F1     | -0.91094921  | 3.8845E-13  | 3.18255E-12 | DOWN   | POU class 5 homeobox 1 [Source:HGNC Symbol;Acc:HGNC:9221]                                             | chr6  | 31164337   | 31180731  | 2896  |
| SAMD11     | -0.737597667 | 4.06818E-13 | 3.33003E-12 | DOWN   | sterile alpha motif domain containing 11 [Source:HGNC Symbol;Acc:HGNC:28706]                          | chr1  | 925738     | 944581    | 2560  |
| RAB42      | 0.61299828   | 4.36809E-13 | 3.56105E-12 | UP     | RAB42, member RAS oncogene family [Source:HGNC Symbol;Acc:HGNC:28702]                                 | chr1  | 28592200   | 28595443  | 2200  |
| ESRP2      | -0.684337761 | 4.37995E-13 | 3.56912E-12 | DOWN   | epithelial splicing regulatory protein 2 [Source:HGNC Symbol;Acc:HGNC:26152]                          | chr16 | 68229111   | 68236584  | 3838  |
| SULT2A1    | -1.561665993 | 4.48734E-13 | 3.6517E-12  | DOWN   | sulfotransferase family 2A member 1 [Source:HGNC Symbol;Acc:HGNC:11458]                               | chr19 | 47870466   | 47886397  | 1987  |
| CXADR      | -0.624793875 | 4.53222E-13 | 3.68329E-12 | DOWN   | CXADR, Ig-like cell adhesion molecule [Source:HGNC Symbol;Acc:HGNC:2559]                              | chr21 | 17512382   | 17593579  | 6682  |
| CKB        | -0.726208964 | 4.6613E-13  | 3.78308E-12 | DOWN   | creatine kinase B [Source:HGNC Symbol;Acc:HGNC:1991]                                                  | chr14 | 103519659  | 103523111 | 1709  |
| SLC2A3     | 0.58550257   | 4.70005E-13 | 3.80941E-12 | UP     | solute carrier family 2 member 3 [Source:HGNC Symbol;Acc:HGNC:11007]                                  | chr12 | 7919230    | 7936275   | 3915  |
| PLIN5      | -0.805516942 | 5.21783E-13 | 4.20839E-12 | DOWN   | perilipin 5 [Source:HGNC Symbol;Acc:HGNC:33196]                                                       | chr19 | 4522531    | 4535224   | 4292  |
| GLB1L2     | -0.787276875 | 5.3319E-13  | 4.29656E-12 | DOWN   | galactosidase beta 1 like 2 [Source:HGNC Symbol;Acc:HGNC:25129]                                       | chr11 | 134331874  | 134376324 | 3365  |
| MEX3A      | -0.622600512 | 5.36855E-13 | 4.32417E-12 | DOWN   | mex-3 RNA binding family member A [Source:HGNC Symbol;Acc:HGNC:33482]                                 | chr1  | 156072013  | 156081998 | 6124  |
| UGT1A10    | -1.457942751 | 5.4124E-13  | 4.35756E-12 | DOWN   | UDP glucuronosyltransferase family 1 member A10 [Source:HGNC Symbol;Acc:HGNC:12531]                   | chr2  | 233636454  | 233773305 | 3157  |
| C9orf84    | 1.099965631  | 6.45017E-13 | 5.16783E-12 | UP     | chromosome 9 open reading frame 84 [Source:HGNC Symbol;Acc:HGNC:26535]                                | chr9  | 111686173  | 111795008 | 6276  |
| DOCK3      | -0.754734855 | 7.05869E-13 | 5.64291E-12 | DOWN   | dedicator of cytokinesis 3 [Source:HGNC Symbol;Acc:HGNC:2989]                                         | chr3  | 50675241   | 51384198  | 8755  |
| SLC16A1    | 0.594351737  | 7.07274E-13 | 5.65164E-12 | UP     | solute carrier family 16 member 1 [Source:HGNC Symbol;Acc:HGNC:10922]                                 | chr1  | 112911847  | 112956353 | 4669  |
| KDF1       | -0.660556571 | 7.63519E-13 | 6.09035E-12 | DOWN   | keratinocyte differentiation factor 1 [Source:HGNC Symbol;Acc:HGNC:26624]                             | chr1  | 26949562   | 26960406  | 1793  |
| SLC6A4     | -1.080798492 | 7.92181E-13 | 6.30511E-12 | DOWN   | solute carrier family 6 member 4 [Source:HGNC Symbol;Acc:HGNC:11050]                                  | chr17 | 30194319   | 30236002  | 6640  |
| PPP1R3G    | -0.619804507 | 8.02498E-13 | 6.38442E-12 | DOWN   | protein phosphatase 1 regulatory subunit 3G [Source:HGNC Symbol;Acc:HGNC:14945]                       | chr6  | 5084581    | 5089487   | 4907  |
| FAM110C    | -0.742487474 | 8.19111E-13 | 6.51373E-12 | DOWN   | family with sequence similarity 110 member C [Source:HGNC Symbol;Acc:HGNC:33340]                      | chr2  | 38814      | 46385     | 3760  |
| FOXO6      | -0.771216607 | 8.25865E-13 | 6.56455E-12 | DOWN   | forkhead box O6 [Source:HGNC Symbol;Acc:HGNC:24814]                                                   | chr1  | 41361931   | 41382678  | 1476  |
| IL1R2      | 0.77839276   | 8.73237E-13 | 6.92592E-12 | UP     | interleukin 1 receptor type 2 [Source:HGNC Symbol;Acc:HGNC:5994]                                      | chr2  | 101991834  | 102028544 | 1858  |
| PKIA       | -0.683334145 | 8.92717E-13 | 7.07733E-12 | DOWN   | cAMP-dependent protein kinase inhibitor alpha [Source:HGNC Symbol;Acc:HGNC:9017]                      | chr8  | 78516139   | 78605267  | 4216  |
| HHIP       | -1.033665876 | 9.34531E-13 | 7.38622E-12 | DOWN   | hedgehog interacting protein [Source:HGNC Symbol;Acc:HGNC:14866]                                      | chr4  | 144646021  | 144745271 | 10507 |
| TMEM51-AS1 | -0.634750772 | 9.81795E-13 | 7.74627E-12 | DOWN   | TMEM51 antisense RNA 1 [Source:HGNC Symbol;Acc:HGNC:26301]                                            | chr1  | 15111815   | 15152464  | 7100  |
| HIST1H3J   | 0.701994539  | 1.05161E-12 | 8.28271E-12 | UP     | histone cluster 1 H3 family member j [Source:HGNC Symbol;Acc:HGNC:4774]                               | chr6  | 27890382   | 27890792  | 411   |
| AGR2       | -1.268331327 | 1.06295E-12 | 8.36835E-12 | DOWN   | anterior gradient 2, protein disulphide isomerase family member [Source:HGNC Symbol;Acc:HGNC:328]     | chr7  | 16791811   | 16805080  | 2040  |
| MDF1       | -0.605390523 | 1.07109E-12 | 8.42877E-12 | DOWN   | MyoD family inhibitor [Source:HGNC Symbol;Acc:HGNC:6967]                                              | chr6  | 41637068   | 41654239  | 1798  |
| IVL        | -1.310417534 | 1.09674E-12 | 8.62317E-12 | DOWN   | involucrin [Source:HGNC Symbol;Acc:HGNC:6187]                                                         | chr1  | 152908545  | 152911886 | 2153  |
| ZNF66      | -0.606026453 | 1.1117E-12  | 8.73323E-12 | DOWN   | zinc finger protein 66 [Source:HGNC Symbol;Acc:HGNC:13135]                                            | chr19 | 20776304   | 20807322  | 3009  |
| TPTE2      | 0.768432222  | 1.16067E-12 | 9.10999E-12 | UP     | transmembrane phosphoinositide 3-phosphatase and tensin homolog 2 [Source:HGNC Symbol;Acc:HGNC:17299] | chr13 | 19422877   | 19536762  | 2160  |
| MECOM      | -0.59110931  | 1.18167E-12 | 9.26682E-12 | DOWN   | MDS1 and EVI1 complex locus [Source:HGNC Symbol;Acc:HGNC:3498]                                        | chr3  | 169083499  | 169663470 | 6696  |
| CCL3L3     | 0.923199231  | 1.19468E-12 | 9.35667E-12 | UP     | C-C motif chemokine ligand 3 like 3 [Source:HGNC Symbol;Acc:HGNC:30554]                               | chr17 | 36194869   | 36196758  | 784   |
| PTK6       | -0.838027946 | 1.20813E-12 | 9.45691E-12 | DOWN   | protein tyrosine kinase 6 [Source:HGNC Symbol;Acc:HGNC:9617]                                          | chr20 | 63528001   | 63537370  | 2947  |
| CCDC152    | 0.664110751  | 1.22325E-12 | 9.55158E-12 | UP     | coiled-coil domain containing 152 [Source:HGNC Symbol;Acc:HGNC:34438]                                 | chr5  | 42756801   | 42802360  | 3431  |
| KLF15      | -0.767511469 | 1.22449E-12 | 9.55711E-12 | DOWN   | Kruppel like factor 15 [Source:HGNC Symbol;Acc:HGNC:14536]                                            | chr3  | 126342635  | 126357442 | 2574  |
| AIFM3      | -0.620934984 | 1.27148E-12 | 9.91112E-12 | DOWN   | apoptosis inducing factor, mitochondria associated 3 [Source:HGNC Symbol;Acc:HGNC:26398]              | chr22 | 20965108   | 20981360  | 2535  |
| EVPLL      | -1.036826862 | 1.29765E-12 | 1.01064E-11 | DOWN   | envoplakin like [Source:HGNC Symbol;Acc:HGNC:35236]                                                   | chr17 | 18377662   | 18389647  | 2095  |
| CEACAM3    | 0.761651054  | 1.33131E-12 | 1.03552E-11 | UP     | carcinoembryonic antigen related cell adhesion molecule 3 [Source:HGNC Symbol;Acc:HGNC:1815]          | chr19 | 41796437   | 41811553  | 1316  |
| AC010329.5 | -0.973680548 | 1.33961E-12 | 1.04153E-11 | DOWN   |                                                                                                       | chr19 | 20674923   | 20696533  | 2174  |
| GSDMC      | 0.980115735  | 1.60641E-12 | 1.24257E-11 | UP     | gasdermin C [Source:HGNC Symbol;Acc:HGNC:7151]                                                        | chr8  | 129748196  | 129786888 | 2714  |
| TFAP2A     | 0.823552067  | 1.6256E-12  | 1.25687E-11 | UP     | transcription factor AP-2 alpha [Source:HGNC Symbol;Acc:HGNC:11742]                                   | chr6  | 10396677   | 10419638  | 4612  |
| AL513217.1 | -0.672798215 | 1.652E-12   | 1.27511E-11 | DOWN   |                                                                                                       | chr1  | 201898100  | 201899978 | 600   |
| KCNJ5      | 0.610742228  | 1.80643E-12 | 1.39076E-11 | UP     | potassium voltage-gated channel subfamily J member 5 [Source:HGNC Symbol;Acc:HGNC:6266]               | chr11 | 128891356  | 128921035 | 6109  |
| LINC00243  | 0.662860946  | 1.88005E-12 | 1.44683E-11 | UP     | long intergenic non-protein coding RNA 243 [Source:HGNC Symbol;Acc:HGNC:30956]                        | chr6  | 30812866   | 30830659  | 2052  |
| IGSF5      | -0.813710762 | 1.96585E-12 | 1.50965E-11 | DOWN   | immunoglobulin superfamily member 5 [Source:HGNC Symbol;Acc:HGNC:5952]                                | chr21 | 39745407   | 39802096  | 2066  |
| CSF2       | 0.846102792  | 2.05256E-12 | 1.57291E-11 | UP     | colony stimulating factor 2 [Source:HGNC Symbol;Acc:HGNC:2434]                                        | chr5  | 132073790  | 132076170 | 787   |
| IQANK1     | -0.607749185 | 2.05972E-12 | 1.57706E-11 | DOWN   | IQ motif and ankyrin repeat containing 1 [Source:HGNC Symbol;Acc:HGNC:49576]                          | chr8  | 143734140  | 143790644 | 4281  |

| PARAM      | logFC        | pval        | pval.adj    | UPDOWN | desc                                                                                                  | chr   | start      | end       | size  |
|------------|--------------|-------------|-------------|--------|-------------------------------------------------------------------------------------------------------|-------|------------|-----------|-------|
| SLC26A5    | -1.043725861 | 2.14174E-12 | 1.6364E-11  | DOWN   | solute carrier family 26 member 5 [Source:HGNC Symbol;Acc:HGNC:9359]                                  | chr7  | 103352730  | 103446177 | 2892  |
| PRR15L     | -1.057499442 | 2.34395E-12 | 1.78639E-11 | DOWN   | proline rich 15 like [Source:HGNC Symbol;Acc:HGNC:28149]                                              | chr17 | 47951967   | 47957878  | 1519  |
| IL24       | 0.89155198   | 2.40046E-12 | 1.82562E-11 | UP     | interleukin 24 [Source:HGNC Symbol;Acc:HGNC:11346]                                                    | chr1  | 206897443  | 206904139 | 1979  |
| IL1B       | 0.6527425    | 2.42547E-12 | 1.84387E-11 | UP     | interleukin 1 beta [Source:HGNC Symbol;Acc:HGNC:5992]                                                 | chr2  | 1112829751 | 112836903 | 1631  |
| CLDN34     | -0.682271908 | 2.81848E-12 | 2.13102E-11 | DOWN   | claudin 34 [Source:HGNC Symbol;Acc:HGNC:51259]                                                        | chrX  | 9967358    | 9968352   | 995   |
| CD109      | 0.59200093   | 2.91918E-12 | 2.20348E-11 | UP     | CD109 molecule [Source:HGNC Symbol;Acc:HGNC:21685]                                                    | chr6  | 73695785   | 73828316  | 9452  |
| FAM83F     | -0.835832779 | 3.00578E-12 | 2.26414E-11 | DOWN   | family with sequence similarity 83 member F [Source:HGNC Symbol;Acc:HGNC:25148]                       | chr22 | 39994949   | 40043529  | 15998 |
| GRHL1      | -0.690009536 | 3.05001E-12 | 2.2965E-11  | DOWN   | grainyhead like transcription factor 1 [Source:HGNC Symbol;Acc:HGNC:17923]                            | chr2  | 9951698    | 10002277  | 3618  |
| AC098934.2 | -0.698348715 | 3.18754E-12 | 2.39508E-11 | DOWN   |                                                                                                       | chr1  | 202861754  | 202875241 | 2321  |
| SPERT      | -0.82737952  | 3.32261E-12 | 2.49038E-11 | DOWN   | spermatid associated [Source:HGNC Symbol;Acc:HGNC:30720]                                              | chr13 | 45702311   | 45714559  | 2125  |
| ADTRP      | 0.745306585  | 3.36373E-12 | 2.52015E-11 | UP     | androgen dependent TFPI regulating protein [Source:HGNC Symbol;Acc:HGNC:21214]                        | chr6  | 11713524   | 11779170  | 2112  |
| AL136982.6 | -0.755890679 | 3.58399E-12 | 2.67743E-11 | DOWN   |                                                                                                       | chr10 | 86993432   | 87024732  | 1238  |
| SCUBE3     | -0.769967578 | 3.61856E-12 | 2.70214E-11 | DOWN   | signal peptide, CUB domain and EGF like domain containing 3 [Source:HGNC Symbol;Acc:HGNC:13655]       | chr6  | 35214419   | 35253079  | 7356  |
| SLC44A4    | -1.076637615 | 3.71369E-12 | 2.76862E-11 | DOWN   | solute carrier family 44 member 4 [Source:HGNC Symbol;Acc:HGNC:13941]                                 | chr6  | 31863192   | 31879046  | 2743  |
| AKR1C3     | -0.883001514 | 4.62447E-12 | 3.4223E-11  | DOWN   | aldo-keto reductase family 1 member C3 [Source:HGNC Symbol;Acc:HGNC:386]                              | chr10 | 5048812    | 5107686   | 2231  |
| IL20RB     | 0.893375285  | 4.6391E-12  | 3.43032E-11 | UP     | interleukin 20 receptor subunit beta [Source:HGNC Symbol;Acc:HGNC:6004]                               | chr3  | 136957865  | 137011085 | 2047  |
| TMEM132E   | -0.721128302 | 4.76673E-12 | 3.52039E-11 | DOWN   | transmembrane protein 132E [Source:HGNC Symbol;Acc:HGNC:26991]                                        | chr17 | 34579487   | 34639318  | 5901  |
| KCTD16     | -0.810728966 | 4.79975E-12 | 3.54334E-11 | DOWN   | potassium channel tetramerization domain containing 16 [Source:HGNC Symbol;Acc:HGNC:29244]            | chr5  | 144170832  | 144485686 | 14294 |
| MYO3B      | -0.959064938 | 4.8782E-12  | 3.59979E-11 | DOWN   | myosin IIIB [Source:HGNC Symbol;Acc:HGNC:15576]                                                       | chr2  | 170178145  | 170654481 | 5529  |
| PLAC8      | 0.73689704   | 5.23964E-12 | 3.84771E-11 | UP     | placenta specific 8 [Source:HGNC Symbol;Acc:HGNC:19254]                                               | chr4  | 83090048   | 83137075  | 3853  |
| RASL11B    | -0.673626241 | 5.5312E-12  | 4.05197E-11 | DOWN   | RAS like family 11 member B [Source:HGNC Symbol;Acc:HGNC:23804]                                       | chr4  | 52862290   | 52866835  | 1995  |
| TINAGL1    | -0.589166868 | 5.69339E-12 | 4.16405E-11 | DOWN   | tubulointerstitial nephritis antigen like 1 [Source:HGNC Symbol;Acc:HGNC:19168]                       | chr1  | 31576485   | 31587686  | 2281  |
| PSD        | -0.590338748 | 5.80893E-12 | 4.24342E-11 | DOWN   | pleckstrin and Sec7 domain containing [Source:HGNC Symbol;Acc:HGNC:9507]                              | chr10 | 102402617  | 102419934 | 4318  |
| EPHB6      | -0.6749697   | 6.59886E-12 | 4.7992E-11  | DOWN   | EPH receptor B6 [Source:HGNC Symbol;Acc:HGNC:3396]                                                    | chr7  | 142855061  | 142871094 | 4015  |
| GFPT2      | 0.679754203  | 6.70216E-12 | 4.86651E-11 | UP     | glutamine-fructose-6-phosphate transaminase 2 [Source:HGNC Symbol;Acc:HGNC:4242]                      | chr5  | 180300690  | 180353387 | 3093  |
| XCL1       | 0.796710242  | 6.90917E-12 | 5.01281E-11 | UP     | X-C motif chemokine ligand 1 [Source:HGNC Symbol;Acc:HGNC:10645]                                      | chr1  | 168576473  | 168582077 | 1367  |
| CLCA4      | -1.264834593 | 7.06589E-12 | 5.12242E-11 | DOWN   | chloride channel accessory 4 [Source:HGNC Symbol;Acc:HGNC:2018]                                       | chr1  | 86547078   | 86580754  | 3211  |
| SDS        | 0.67199269   | 7.6006E-12  | 5.49467E-11 | UP     | serine dehydratase [Source:HGNC Symbol;Acc:HGNC:10691]                                                | chr12 | 113392445  | 113403888 | 1606  |
| SV2C       | -0.797102378 | 7.73319E-12 | 5.58385E-11 | DOWN   | synaptic vesicle glycoprotein 2C [Source:HGNC Symbol;Acc:HGNC:30670]                                  | chr5  | 76083172   | 76353939  | 11845 |
| PLS1       | -0.603809041 | 7.81215E-12 | 5.63862E-11 | DOWN   | plastin 1 [Source:HGNC Symbol;Acc:HGNC:9090]                                                          | chr3  | 142596387  | 142713664 | 4167  |
| AC025569.1 | 0.788147184  | 7.92346E-12 | 5.71668E-11 | UP     |                                                                                                       | chr12 | 70468085   | 70543040  | 5903  |
| CYP4B1     | -1.067659699 | 9.01903E-12 | 6.48133E-11 | DOWN   | cytochrome P450 family 4 subfamily B member 1 [Source:HGNC Symbol;Acc:HGNC:2644]                      | chr1  | 46798998   | 46819413  | 2729  |
| CYP4F8     | -1.297721564 | 9.81728E-12 | 7.03546E-11 | DOWN   | cytochrome P450 family 4 subfamily F member 8 [Source:HGNC Symbol;Acc:HGNC:2648]                      | chr19 | 15615221   | 15629623  | 1889  |
| MYH14      | -0.751030477 | 1.02783E-11 | 7.35714E-11 | DOWN   | myosin heavy chain 14 [Source:HGNC Symbol;Acc:HGNC:23212]                                             | chr19 | 50188186   | 50310545  | 7035  |
| RG56       | -0.854351327 | 1.04166E-11 | 7.4502E-11  | DOWN   | regulator of G protein signaling 6 [Source:HGNC Symbol;Acc:HGNC:10002]                                | chr14 | 71932439   | 72566529  | 7145  |
| DMBX1      | -0.925445376 | 1.11634E-11 | 7.95615E-11 | DOWN   | diencephalon/mesencephalon homeobox 1 [Source:HGNC Symbol;Acc:HGNC:19026]                             | chr1  | 46506996   | 46514226  | 2896  |
| DHRS9      | 0.828232392  | 1.13255E-11 | 8.05899E-11 | UP     | dehydrogenase/reductase 9 [Source:HGNC Symbol;Acc:HGNC:16888]                                         | chr2  | 169064789  | 169096167 | 3750  |
| PLIN4      | -0.730852951 | 1.18972E-11 | 8.44256E-11 | DOWN   | perilipin 4 [Source:HGNC Symbol;Acc:HGNC:29393]                                                       | chr19 | 4502180    | 4518465   | 6502  |
| TRPM5      | -0.870364326 | 1.27988E-11 | 9.04697E-11 | DOWN   | transient receptor potential cation channel subfamily M member 5 [Source:HGNC Symbol;Acc:HGNC:14323]  | chr11 | 2404515    | 2423045   | 3956  |
| ESRP1      | -0.826181396 | 1.28596E-11 | 9.08287E-11 | DOWN   | epithelial splicing regulatory protein 1 [Source:HGNC Symbol;Acc:HGNC:25966]                          | chr8  | 94641074   | 94707466  | 3868  |
| PRKCG      | 0.991390199  | 1.28971E-11 | 9.10578E-11 | UP     | protein kinase C gamma [Source:HGNC Symbol;Acc:HGNC:9402]                                             | chr19 | 53882213   | 53907652  | 3133  |
| ANKRD65    | -0.755140832 | 1.32347E-11 | 9.33687E-11 | DOWN   | ankyrin repeat domain 65 [Source:HGNC Symbol;Acc:HGNC:42950]                                          | chr1  | 1418420    | 1421769   | 2644  |
| SYNGR3     | 0.71201427   | 1.39768E-11 | 9.83751E-11 | UP     | synaptogyrin 3 [Source:HGNC Symbol;Acc:HGNC:11501]                                                    | chr16 | 1989945    | 1994275   | 2901  |
| CLEC12B    | 0.737028133  | 1.42216E-11 | 9.99813E-11 | UP     | C-type lectin domain family 12 member B [Source:HGNC Symbol;Acc:HGNC:31966]                           | chr12 | 10010632   | 10018619  | 3318  |
| SLC6A12    | 0.696783303  | 1.48858E-11 | 1.04327E-10 | UP     | solute carrier family 6 member 12 [Source:HGNC Symbol;Acc:HGNC:11045]                                 | chr12 | 190077     | 214120    | 3814  |
| ENTHD1     | 0.754167578  | 1.49786E-11 | 1.04937E-10 | UP     | ENTH domain containing 1 [Source:HGNC Symbol;Acc:HGNC:26352]                                          | chr22 | 39743044   | 39893790  | 2710  |
| MYBPC2     | 0.951572296  | 1.54316E-11 | 1.07985E-10 | UP     | myosin binding protein C, fast type [Source:HGNC Symbol;Acc:HGNC:7550]                                | chr19 | 50432903   | 50466321  | 3593  |
| AC010503.4 | -0.61310535  | 1.5525E-11  | 1.08597E-10 | DOWN   |                                                                                                       | chr19 | 6469465    | 6470152   | 688   |
| TAC3       | -1.199634168 | 1.57404E-11 | 1.10019E-10 | DOWN   | tachykinin 3 [Source:HGNC Symbol;Acc:HGNC:11521]                                                      | chr12 | 57010000   | 57028883  | 1265  |
| AQP7       | -0.90625528  | 1.59637E-11 | 1.11408E-10 | DOWN   | aquaporin 7 [Source:HGNC Symbol;Acc:HGNC:640]                                                         | chr9  | 33383179   | 33402586  | 3829  |
| CLC        | 0.801304446  | 1.62171E-11 | 1.13002E-10 | UP     | Charcot-Leyden crystal galectin [Source:HGNC Symbol;Acc:HGNC:2014]                                    | chr19 | 39731250   | 39738028  | 635   |
| FNDC5      | -0.696354082 | 1.6997E-11  | 1.18028E-10 | DOWN   | fibronectin type III domain containing 5 [Source:HGNC Symbol;Acc:HGNC:20240]                          | chr1  | 32862268   | 32872480  | 3034  |
| FNDC11     | -0.68044498  | 1.74236E-11 | 1.20944E-10 | DOWN   | fibronectin type III domain containing 11 [Source:HGNC Symbol;Acc:HGNC:28764]                         | chr20 | 63553020   | 63556708  | 3076  |
| SIGLEC15   | -0.715221737 | 1.75934E-11 | 1.2203E-10  | DOWN   | sialic acid binding Ig like lectin 15 [Source:HGNC Symbol;Acc:HGNC:27596]                             | chr18 | 45825512   | 45842556  | 1666  |
| CAPN8      | -1.283133023 | 1.80287E-11 | 1.24906E-10 | DOWN   | calpain 8 [Source:HGNC Symbol;Acc:HGNC:1485]                                                          | chr1  | 223541609  | 223665734 | 3811  |
| FAM157C    | 0.675862201  | 1.8637E-11  | 1.28874E-10 | UP     | family with sequence similarity 157 member C (non-protein coding) [Source:HGNC Symbol;Acc:HGNC:34081] | chr16 | 90102271   | 90178344  | 3990  |
| CKMT1B     | -0.837635303 | 1.86817E-11 | 1.29134E-10 | DOWN   | creatine kinase, mitochondrial 1B [Source:HGNC Symbol;Acc:HGNC:1995]                                  | chr15 | 43593054   | 43599406  | 1986  |

| PARAM      | logFC        | pval        | pval.adj    | UPDOWN | desc                                                                                                  | chr   | start     | end       | size  |
|------------|--------------|-------------|-------------|--------|-------------------------------------------------------------------------------------------------------|-------|-----------|-----------|-------|
| GSTM2P1    | -0.895708351 | 1.89347E-11 | 1.30783E-10 | DOWN   | glutathione S-transferase mu 2 pseudogene 1 [Source:HGNC Symbol;Acc:HGNC:38009]                       | chr6  | 111046868 | 111047521 | 654   |
| GRID2IP    | -0.607872117 | 1.938E-11   | 1.33706E-10 | DOWN   | Grid2 interacting protein [Source:HGNC Symbol;Acc:HGNC:18464]                                         | chr7  | 6497462   | 6551436   | 4134  |
| MARCO      | 1.012662444  | 1.95953E-11 | 1.3514E-10  | UP     | macrophage receptor with collagenous structure [Source:HGNC Symbol;Acc:HGNC:6895]                     | chr2  | 118942166 | 118994660 | 1838  |
| AC133065.2 | 0.699448995  | 2.05034E-11 | 1.41187E-10 | UP     |                                                                                                       | chr16 | 10940719  | 10943021  | 2147  |
| UGT1A13P   | -1.192237434 | 2.10388E-11 | 1.446E-10   | DOWN   | UDP glucuronosyltransferase family 1 member A13, pseudogene [Source:HGNC Symbol;Acc:HGNC:32191]       | chr2  | 233647926 | 233649026 | 762   |
| SMIM5      | -0.628676867 | 2.19012E-11 | 1.50299E-10 | DOWN   | small integral membrane protein 5 [Source:HGNC Symbol;Acc:HGNC:40030]                                 | chr17 | 75633434  | 75641404  | 5117  |
| B3GNT3     | -0.852237133 | 2.38731E-11 | 1.63522E-10 | DOWN   | UDP-GlcNAc:betaGal-beta-1,3-N-acetylglucosaminyltransferase 3 [Source:HGNC Symbol;Acc:HGNC:13528]     | chr19 | 17795110  | 17813082  | 2245  |
| KCNK13     | 0.601181401  | 2.64199E-11 | 1.80557E-10 | UP     | potassium two pore domain channel subfamily K member 13 [Source:HGNC Symbol;Acc:HGNC:6275]            | chr14 | 90061765  | 90185857  | 2522  |
| IL5RA      | 0.750868628  | 2.73049E-11 | 1.86395E-10 | UP     | interleukin 5 receptor subunit alpha [Source:HGNC Symbol;Acc:HGNC:6017]                               | chr3  | 3066326   | 3110374   | 6512  |
| ICAM4      | 0.733748151  | 3.16041E-11 | 2.14451E-10 | UP     | intercellular adhesion molecule 4 (Landsteiner-Wiener blood group) [Source:HGNC Symbol;Acc:HGNC:5347] | chr19 | 10286967  | 10288522  | 1427  |
| GABRP      | 1.343148098  | 3.39809E-11 | 2.30234E-10 | UP     | gamma-aminobutyric acid type A receptor pi subunit [Source:HGNC Symbol;Acc:HGNC:4089]                 | chr5  | 170782682 | 170814047 | 3670  |
| TEKT5      | -0.663217924 | 3.45089E-11 | 2.33637E-10 | DOWN   | tektin 5 [Source:HGNC Symbol;Acc:HGNC:26554]                                                          | chr16 | 10627501  | 10694945  | 1612  |
| ADGRG3     | 0.649564188  | 3.47246E-11 | 2.34922E-10 | UP     | adhesion G protein-coupled receptor G3 [Source:HGNC Symbol;Acc:HGNC:13728]                            | chr16 | 57668187  | 57689378  | 2728  |
| CASQ1      | -0.910835075 | 3.90643E-11 | 2.63103E-10 | DOWN   | calsequestrin 1 [Source:HGNC Symbol;Acc:HGNC:1512]                                                    | chr1  | 160190556 | 160201886 | 2012  |
| TUBB8      | -0.779553958 | 4.06134E-11 | 2.73233E-10 | DOWN   | tubulin beta 8 class VIII [Source:HGNC Symbol;Acc:HGNC:20773]                                         | chr10 | 46892     | 74163     | 2791  |
| PODXL2     | -0.622386537 | 4.08212E-11 | 2.74528E-10 | DOWN   | podocalyxin like 2 [Source:HGNC Symbol;Acc:HGNC:17936]                                                | chr3  | 127629181 | 127672809 | 2186  |
| CDH8       | -0.88171062  | 4.22822E-11 | 2.84038E-10 | DOWN   | cadherin 8 [Source:HGNC Symbol;Acc:HGNC:1767]                                                         | chr16 | 61647242  | 62036835  | 11649 |
| COL28A1    | -0.655838635 | 4.26891E-11 | 2.86559E-10 | DOWN   | collagen type XXVIII alpha 1 chain [Source:HGNC Symbol;Acc:HGNC:22442]                                | chr7  | 7357875   | 7535853   | 4277  |
| RAB3B      | -0.782469789 | 4.72712E-11 | 3.16263E-10 | DOWN   | RAB3B, member RAS oncogene family [Source:HGNC Symbol;Acc:HGNC:9778]                                  | chr1  | 51907956  | 51990764  | 12844 |
| IRS4       | -1.063509137 | 4.89105E-11 | 3.26388E-10 | DOWN   | insulin receptor substrate 4 [Source:HGNC Symbol;Acc:HGNC:6128]                                       | chrX  | 108732482 | 108736409 | 3928  |
| DUOX1      | -0.787032977 | 5.97197E-11 | 3.95031E-10 | DOWN   | dual oxidase 1 [Source:HGNC Symbol;Acc:HGNC:3062]                                                     | chr15 | 45129933  | 45165576  | 6062  |
| ERN2       | -1.317001294 | 6.24303E-11 | 4.11759E-10 | DOWN   | endoplasmic reticulum to nucleus signaling 2 [Source:HGNC Symbol;Acc:HGNC:16942]                      | chr16 | 23690326  | 23713500  | 3599  |
| EFNB3      | -0.658135033 | 6.25007E-11 | 4.12073E-10 | DOWN   | ephrin B3 [Source:HGNC Symbol;Acc:HGNC:3228]                                                          | chr17 | 7705202   | 7711378   | 3222  |
| TTYH1      | -0.744625514 | 6.42435E-11 | 4.22948E-10 | DOWN   | twoeety family member 1 [Source:HGNC Symbol;Acc:HGNC:13476]                                           | chr19 | 54415431  | 54436900  | 2088  |
| RNF186     | -0.967676407 | 6.9687E-11  | 4.56795E-10 | DOWN   | ring finger protein 186 [Source:HGNC Symbol;Acc:HGNC:25978]                                           | chr1  | 19814029  | 19815278  | 1250  |
| MMP3       | 0.970358946  | 7.49651E-11 | 4.90152E-10 | UP     | matrix metalloproteinase 3 [Source:HGNC Symbol;Acc:HGNC:7173]                                         | chr11 | 102835801 | 102843803 | 2016  |
| SNAP91     | -0.928206896 | 7.67158E-11 | 5.01418E-10 | DOWN   | synaptosome associated protein 91 [Source:HGNC Symbol;Acc:HGNC:14986]                                 | chr6  | 83552880  | 83709691  | 5017  |
| FOXQ1      | -0.837053238 | 7.71517E-11 | 5.04086E-10 | DOWN   | forkhead box Q1 [Source:HGNC Symbol;Acc:HGNC:20951]                                                   | chr6  | 1312440   | 1314748   | 2309  |
| HS6ST3     | -0.945590928 | 8.03882E-11 | 5.24155E-10 | DOWN   | heparan sulfate 6-O-sulfotransferase 3 [Source:HGNC Symbol;Acc:HGNC:19134]                            | chr13 | 96090839  | 96839562  | 7806  |
| CRLF2      | 0.705432003  | 8.16811E-11 | 5.32145E-10 | UP     | cytokine receptor like factor 2 [Source:HGNC Symbol;Acc:HGNC:14281]                                   | chrX  | 1187549   | 1212750   | 1665  |
| PI3        | 1.342014409  | 8.23555E-11 | 5.36346E-10 | UP     | peptidase inhibitor 3 [Source:HGNC Symbol;Acc:HGNC:8947]                                              | chr20 | 45174876  | 45176544  | 577   |
| ELAVL4     | 0.756617794  | 8.3093E-11  | 5.40567E-10 | UP     | ELAV like RNA binding protein 4 [Source:HGNC Symbol;Acc:HGNC:3315]                                    | chr1  | 50048014  | 50203786  | 4736  |
| RPSAP11    | -0.743354374 | 8.43018E-11 | 5.48037E-10 | DOWN   | ribosomal protein SA pseudogene 11 [Source:HGNC Symbol;Acc:HGNC:6503]                                 | chr3  | 32190747  | 32191627  | 881   |
| CACNA1E    | 0.794144705  | 8.73845E-11 | 5.67264E-10 | UP     | calcium voltage-gated channel subunit alpha1 E [Source:HGNC Symbol;Acc:HGNC:1392]                     | chr1  | 181483580 | 181808084 | 16370 |
| ETV4       | -0.715907552 | 9.3614E-11  | 6.06401E-10 | DOWN   | ETS variant 4 [Source:HGNC Symbol;Acc:HGNC:3493]                                                      | chr17 | 43527844  | 43546432  | 2804  |
| PHACTR3    | -0.818799992 | 9.99723E-11 | 6.46894E-10 | DOWN   | phosphatase and actin regulator 3 [Source:HGNC Symbol;Acc:HGNC:15833]                                 | chr20 | 59577509  | 59847711  | 3378  |
| TSPAN8     | -1.339136031 | 1.00035E-10 | 6.47069E-10 | DOWN   | tetraspanin 8 [Source:HGNC Symbol;Acc:HGNC:11855]                                                     | chr12 | 71125085  | 71441898  | 1798  |
| TMEM255A   | 0.697237229  | 1.03805E-10 | 6.70257E-10 | UP     | transmembrane protein 255A [Source:HGNC Symbol;Acc:HGNC:26086]                                        | chrX  | 120258650 | 120311536 | 3602  |
| DOK7       | -0.724309595 | 1.16046E-10 | 7.4823E-10  | DOWN   | docking protein 7 [Source:HGNC Symbol;Acc:HGNC:26594]                                                 | chr4  | 3463311   | 3494483   | 2862  |
| WDR49      | 0.717580998  | 1.16952E-10 | 7.53809E-10 | UP     | WD repeat domain 49 [Source:HGNC Symbol;Acc:HGNC:26587]                                               | chr3  | 167478684 | 167653983 | 3602  |
| ST6GAL2    | -0.71958167  | 1.2993E-10  | 8.34786E-10 | DOWN   | ST6 beta-galactoside alpha-2,6-sialyltransferase 2 [Source:HGNC Symbol;Acc:HGNC:10861]                | chr2  | 106801600 | 106887108 | 7561  |
| MISP3      | -0.597221723 | 1.30742E-10 | 8.39112E-10 | DOWN   | MISP family member 3 [Source:HGNC Symbol;Acc:HGNC:26963]                                              | chr19 | 14072536  | 14075062  | 1600  |
| LHX2       | 0.844631887  | 1.30802E-10 | 8.39194E-10 | UP     | LIM homeobox 2 [Source:HGNC Symbol;Acc:HGNC:6594]                                                     | chr9  | 124011610 | 124033001 | 2554  |
| KCNQ5      | 0.779823604  | 1.33092E-10 | 8.53589E-10 | UP     | potassium voltage-gated channel subfamily Q member 5 [Source:HGNC Symbol;Acc:HGNC:6299]               | chr6  | 72621792  | 73198851  | 6844  |
| TMEM52B    | 0.77389529   | 1.37799E-10 | 8.81903E-10 | UP     | transmembrane protein 52B [Source:HGNC Symbol;Acc:HGNC:26438]                                         | chr12 | 10170542  | 10191801  | 3085  |
| LPA        | -1.180274265 | 1.41719E-10 | 9.0572E-10  | DOWN   | lipoprotein(a) [Source:HGNC Symbol;Acc:HGNC:6667]                                                     | chr6  | 160531483 | 160664259 | 6419  |
| RGS13      | 0.723683366  | 1.42974E-10 | 9.13409E-10 | UP     | regulator of G protein signaling 13 [Source:HGNC Symbol;Acc:HGNC:9995]                                | chr1  | 192636138 | 192660306 | 1558  |
| AC124067.2 | -0.839862513 | 1.50301E-10 | 9.57857E-10 | DOWN   |                                                                                                       | chr8  | 37516410  | 37517021  | 510   |
| OVCH2      | -0.860253121 | 1.55878E-10 | 9.9131E-10  | DOWN   | ovochymase 2 (gene/pseudogene) [Source:HGNC Symbol;Acc:HGNC:29970]                                    | chr11 | 7689438   | 7706421   | 1922  |
| TRHD       | -0.855192782 | 1.62345E-10 | 1.03099E-09 | DOWN   | thyrotropin releasing hormone degrading enzyme [Source:HGNC Symbol;Acc:HGNC:30748]                    | chr12 | 72272683  | 72670757  | 10733 |
| OR5P1P     | -0.828409058 | 1.65255E-10 | 1.04837E-09 | DOWN   | olfactory receptor family 5 subfamily P member 1 pseudogene [Source:HGNC Symbol;Acc:HGNC:14779]       | chr11 | 7772890   | 7773814   | 925   |
| BNIPL      | -0.74835501  | 1.78845E-10 | 1.13181E-09 | DOWN   | BCL2 interacting protein like [Source:HGNC Symbol;Acc:HGNC:16976]                                     | chr1  | 151036570 | 151047600 | 2395  |
| OSM        | 0.646734611  | 1.78921E-10 | 1.1319E-09  | UP     | oncostatin M [Source:HGNC Symbol;Acc:HGNC:8506]                                                       | chr22 | 30262829  | 30266840  | 2114  |
| HOXA13     | -0.7775849   | 1.79548E-10 | 1.13547E-09 | DOWN   | homeobox A13 [Source:HGNC Symbol;Acc:HGNC:5102]                                                       | chr7  | 27194364  | 27200106  | 5030  |
| SLC38A4    | -1.033838354 | 1.83503E-10 | 1.15927E-09 | DOWN   | solute carrier family 38 member 4 [Source:HGNC Symbol;Acc:HGNC:14679]                                 | chr12 | 46764761  | 46825997  | 3983  |
| OR5P3      | -0.859617295 | 1.84141E-10 | 1.16249E-09 | DOWN   | olfactory receptor family 5 subfamily P member 3 [Source:HGNC Symbol;Acc:HGNC:14784]                  | chr11 | 7824818   | 7830840   | 1193  |
| SDCBP2     | -0.628542479 | 1.91956E-10 | 1.20972E-09 | DOWN   | syndecan binding protein 2 [Source:HGNC Symbol;Acc:HGNC:15756]                                        | chr20 | 1309909   | 1329239   | 1886  |

| PARAM      | logFC        | pval        | pval.adj    | UPDOWN | desc                                                                                                  | chr   | start     | end       | size  |
|------------|--------------|-------------|-------------|--------|-------------------------------------------------------------------------------------------------------|-------|-----------|-----------|-------|
| P2RX1      | 0.663994902  | 1.94896E-10 | 1.22739E-09 | UP     | purinergic receptor P2X 1 [Source:HGNC Symbol;Acc:HGNC:8533]                                          | chr17 | 3896592   | 3916500   | 2697  |
| PTGD5      | 0.716169071  | 1.98743E-10 | 1.25119E-09 | UP     | prostaglandin D2 synthase [Source:HGNC Symbol;Acc:HGNC:9592]                                          | chr9  | 136977505 | 136981738 | 807   |
| FAM3D      | -1.083015569 | 2.15901E-10 | 1.3545E-09  | DOWN   | family with sequence similarity 3 member D [Source:HGNC Symbol;Acc:HGNC:18665]                        | chr3  | 58633946  | 58666848  | 1319  |
| PLA2G10    | -0.766922317 | 2.16307E-10 | 1.35657E-09 | DOWN   | phospholipase A2 group X [Source:HGNC Symbol;Acc:HGNC:9029]                                           | chr16 | 14672545  | 14694669  | 1000  |
| KLHD8A     | -0.737687041 | 2.17379E-10 | 1.36236E-09 | DOWN   | kelch domain containing 8A [Source:HGNC Symbol;Acc:HGNC:25573]                                        | chr1  | 205336065 | 205357090 | 3598  |
| HS3ST3A1   | 0.696255075  | 2.18931E-10 | 1.37073E-09 | UP     | heparan sulfate-glucosamine 3-sulfotransferase 3A1 [Source:HGNC Symbol;Acc:HGNC:5196]                 | chr17 | 13495689  | 13601927  | 2628  |
| NDRG4      | -0.604693204 | 2.18942E-10 | 1.37073E-09 | DOWN   | NDRG family member 4 [Source:HGNC Symbol;Acc:HGNC:14466]                                              | chr16 | 58463665  | 58513628  | 4516  |
| PAX6       | 1.197156823  | 2.26544E-10 | 1.41539E-09 | UP     | paired box 6 [Source:HGNC Symbol;Acc:HGNC:8620]                                                       | chr11 | 31784779  | 31818062  | 11321 |
| NPTXR      | -0.612684951 | 2.31806E-10 | 1.44528E-09 | DOWN   | neuronal pentraxin receptor [Source:HGNC Symbol;Acc:HGNC:7954]                                        | chr22 | 38818452  | 38843982  | 5784  |
| CCR7       | 0.695955532  | 2.35406E-10 | 1.4652E-09  | UP     | C-C motif chemokine receptor 7 [Source:HGNC Symbol;Acc:HGNC:1608]                                     | chr17 | 40553769  | 40565472  | 2508  |
| SLC38A11   | -0.706183618 | 2.38143E-10 | 1.48072E-09 | DOWN   | solute carrier family 38 member 11 [Source:HGNC Symbol;Acc:HGNC:26836]                                | chr2  | 164896186 | 164955525 | 4009  |
| LARGE2     | -0.712522051 | 2.51543E-10 | 1.55976E-09 | DOWN   | LARGE xylosyl- and glucuronyltransferase 2 [Source:HGNC Symbol;Acc:HGNC:16522]                        | chr11 | 45921621  | 45929096  | 2632  |
| CYP4F2     | -1.081591288 | 2.59219E-10 | 1.60461E-09 | DOWN   | cytochrome P450 family 4 subfamily F member 2 [Source:HGNC Symbol;Acc:HGNC:2645]                      | chr19 | 15878023  | 15898120  | 2552  |
| CTNNA3     | -0.674438269 | 2.94578E-10 | 1.80928E-09 | DOWN   | catenin alpha 3 [Source:HGNC Symbol;Acc:HGNC:2511]                                                    | chr10 | 65912518  | 67696169  | 10762 |
| CASKIN1    | -0.754864589 | 3.12684E-10 | 1.91594E-09 | DOWN   | CASK interacting protein 1 [Source:HGNC Symbol;Acc:HGNC:20879]                                        | chr16 | 2177180   | 2196525   | 5759  |
| ZSCAN4     | -0.804187369 | 3.23829E-10 | 1.97955E-09 | DOWN   | zinc finger and SCAN domain containing 4 [Source:HGNC Symbol;Acc:HGNC:23709]                          | chr19 | 57668935  | 57679152  | 2249  |
| TEX11      | 0.629040478  | 3.42243E-10 | 2.08578E-09 | UP     | testis expressed 11 [Source:HGNC Symbol;Acc:HGNC:11733]                                               | chrX  | 70528940  | 70908731  | 3371  |
| CRYBG2     | -0.720625425 | 3.52334E-10 | 2.1444E-09  | DOWN   | crystallin beta-gamma domain containing 2 [Source:HGNC Symbol;Acc:HGNC:17295]                         | chr1  | 26321859  | 26354130  | 5245  |
| MOGAT2     | -0.895818838 | 3.5752E-10  | 2.1745E-09  | DOWN   | monoacylglycerol O-acyltransferase 2 [Source:HGNC Symbol;Acc:HGNC:23248]                              | chr11 | 75717819  | 75732958  | 3365  |
| ACOXL      | -0.858070574 | 3.63989E-10 | 2.21088E-09 | DOWN   | acyl-CoA oxidase like [Source:HGNC Symbol;Acc:HGNC:25621]                                             | chr2  | 110732573 | 111118222 | 4558  |
| LTFF       | 1.101974435  | 3.71265E-10 | 2.25281E-09 | UP     | lactotransferrin [Source:HGNC Symbol;Acc:HGNC:6720]                                                   | chr3  | 46435645  | 46465163  | 3207  |
| SSTR1      | -0.805931602 | 3.96328E-10 | 2.39847E-09 | DOWN   | smoothened receptor 1 [Source:HGNC Symbol;Acc:HGNC:11330]                                             | chr14 | 38207999  | 38213067  | 4295  |
| OR5P2      | -0.906499415 | 4.00696E-10 | 2.42329E-09 | DOWN   | olfactory receptor family 5 subfamily P member 2 [Source:HGNC Symbol;Acc:HGNC:14783]                  | chr11 | 7795905   | 7796973   | 1069  |
| NTRK1      | 0.60175089   | 4.19348E-10 | 2.53035E-09 | UP     | neurotrophic receptor tyrosine kinase 1 [Source:HGNC Symbol;Acc:HGNC:8031]                            | chr1  | 156815656 | 156881850 | 3024  |
| BCL2L14    | 0.700878405  | 4.32684E-10 | 2.60545E-09 | UP     | BCL2 like 14 [Source:HGNC Symbol;Acc:HGNC:16657]                                                      | chr12 | 12049844  | 12099695  | 2495  |
| SRRM3      | -0.725690619 | 4.48395E-10 | 2.69736E-09 | DOWN   | serine/arginine repetitive matrix 3 [Source:HGNC Symbol;Acc:HGNC:26729]                               | chr7  | 76201900  | 76287286  | 3612  |
| GAS2       | -0.760866182 | 4.74652E-10 | 2.84682E-09 | DOWN   | growth arrest specific 2 [Source:HGNC Symbol;Acc:HGNC:4167]                                           | chr11 | 22666615  | 22813055  | 2531  |
| SLC1A7     | -0.880862115 | 4.78923E-10 | 2.86863E-09 | DOWN   | solute carrier family 1 member 7 [Source:HGNC Symbol;Acc:HGNC:10945]                                  | chr1  | 53087179  | 53142632  | 4730  |
| LAMA1      | 0.647629035  | 4.9297E-10  | 2.94887E-09 | UP     | laminin subunit alpha 1 [Source:HGNC Symbol;Acc:HGNC:6481]                                            | chr18 | 6941744   | 7117814   | 9858  |
| MYBPC1     | -1.278002773 | 4.93279E-10 | 2.94975E-09 | DOWN   | myosin binding protein C, slow type [Source:HGNC Symbol;Acc:HGNC:7549]                                | chr12 | 101594889 | 101686018 | 4344  |
| TLE6       | -0.640106895 | 5.27533E-10 | 3.14421E-09 | DOWN   | transducin like enhancer of split 6 [Source:HGNC Symbol;Acc:HGNC:30788]                               | chr19 | 2977446   | 2995184   | 2334  |
| PDIA2      | -0.815283242 | 5.84555E-10 | 3.46585E-09 | DOWN   | protein disulfide isomerase family A member 2 [Source:HGNC Symbol;Acc:HGNC:14180]                     | chr16 | 283152    | 287215    | 1698  |
| C1orf210   | -0.666842194 | 6.29163E-10 | 3.7206E-09  | DOWN   | chromosome 1 open reading frame 210 [Source:HGNC Symbol;Acc:HGNC:28755]                               | chr1  | 43281883  | 43285617  | 1516  |
| LIPH       | -0.824823034 | 6.47629E-10 | 3.8273E-09  | DOWN   | lipase H [Source:HGNC Symbol;Acc:HGNC:18483]                                                          | chr3  | 185506262 | 185552613 | 4026  |
| EPCAM      | -0.762146706 | 6.49408E-10 | 3.83657E-09 | DOWN   | epithelial cell adhesion molecule [Source:HGNC Symbol;Acc:HGNC:11529]                                 | chr2  | 47345158  | 47387034  | 2010  |
| STMN2      | -0.971625172 | 6.76871E-10 | 3.99361E-09 | DOWN   | stathmin 2 [Source:HGNC Symbol;Acc:HGNC:10577]                                                        | chr8  | 79610814  | 79666175  | 2362  |
| COL4A6     | -0.76362861  | 6.84353E-10 | 4.03643E-09 | DOWN   | collagen type IV alpha 6 chain [Source:HGNC Symbol;Acc:HGNC:2208]                                     | chrX  | 108155607 | 108439472 | 6866  |
| UNGP3      | -0.602075921 | 6.96254E-10 | 4.10529E-09 | DOWN   | uracil-DNA glycosylase pseudogene 3 [Source:HGNC Symbol;Acc:HGNC:20036]                               | chr14 | 81259565  | 81260239  | 675   |
| MUC20P1    | -0.733224078 | 7.20706E-10 | 4.24533E-09 | DOWN   | mucin 20, cell surface associated pseudogene 1 [Source:HGNC Symbol;Acc:HGNC:51921]                    | chr3  | 195614947 | 195620233 | 1680  |
| AKR1C1     | -0.831721264 | 7.84433E-10 | 4.60277E-09 | DOWN   | aldo-keto reductase family 1 member C1 [Source:HGNC Symbol;Acc:HGNC:384]                              | chr10 | 4963253   | 4983283   | 7077  |
| ECEL1      | 0.831338505  | 7.96406E-10 | 4.67E-09    | UP     | endothelin converting enzyme like 1 [Source:HGNC Symbol;Acc:HGNC:3147]                                | chr2  | 232479827 | 232487828 | 2865  |
| B3GALT5    | -0.82765871  | 8.37645E-10 | 4.90072E-09 | DOWN   | beta-1,3-galactosyltransferase 5 [Source:HGNC Symbol;Acc:HGNC:920]                                    | chr21 | 39556442  | 39673137  | 13688 |
| MKRN2OS    | -0.733591774 | 8.76623E-10 | 5.11063E-09 | DOWN   | MKRN2 opposite strand [Source:HGNC Symbol;Acc:HGNC:40375]                                             | chr3  | 12539972  | 12545556  | 985   |
| UTS2       | 0.765540014  | 8.78033E-10 | 5.1172E-09  | UP     | urotensin 2 [Source:HGNC Symbol;Acc:HGNC:12636]                                                       | chr1  | 7843083   | 7853512   | 1791  |
| S100A7     | 1.387528967  | 8.81324E-10 | 5.13308E-09 | UP     | S100 calcium binding protein A7 [Source:HGNC Symbol;Acc:HGNC:10497]                                   | chr1  | 153457744 | 153460701 | 536   |
| TTC23L     | -0.595929645 | 9.43538E-10 | 5.48486E-09 | DOWN   | tetratricopeptide repeat domain 23 like [Source:HGNC Symbol;Acc:HGNC:26355]                           | chr5  | 348391664 | 34899456  | 1358  |
| WNT7B      | -0.689409086 | 9.54021E-10 | 5.54047E-09 | DOWN   | Wnt family member 7B [Source:HGNC Symbol;Acc:HGNC:12787]                                              | chr22 | 45920362  | 45977129  | 5051  |
| AC009123.1 | -0.769293679 | 9.67327E-10 | 5.61415E-09 | DOWN   |                                                                                                       | chr16 | 84192558  | 84197053  | 2551  |
| COLEC10    | -0.754273111 | 1.03063E-09 | 5.96246E-09 | DOWN   | collectin subfamily member 10 [Source:HGNC Symbol;Acc:HGNC:2220]                                      | chr8  | 119067241 | 119106582 | 1266  |
| ALG11      | -0.705513365 | 1.07448E-09 | 6.20032E-09 | DOWN   | ALG1, chitobiosyl/diphosphodolichol beta-mannosyltransferase like [Source:HGNC Symbol;Acc:HGNC:33721] | chr3  | 125929275 | 125937039 | 843   |
| FOXH1      | -0.679507198 | 1.08519E-09 | 6.25614E-09 | DOWN   | forkhead box H1 [Source:HGNC Symbol;Acc:HGNC:3814]                                                    | chr8  | 144473412 | 144476335 | 2503  |
| BNP7       | -0.931987584 | 1.19324E-09 | 6.85511E-09 | DOWN   | bone morphogenetic protein 7 [Source:HGNC Symbol;Acc:HGNC:1074]                                       | chr20 | 57168748  | 57266629  | 4218  |
| ALPK4      | 0.666817599  | 1.20014E-09 | 6.89036E-09 | UP     | alpha kinase 2 [Source:HGNC Symbol;Acc:HGNC:20565]                                                    | chr18 | 58481247  | 58628957  | 7303  |
| FXD2       | -1.028960536 | 1.21981E-09 | 6.99441E-09 | DOWN   | FXD domain containing ion transport regulator 4 [Source:HGNC Symbol;Acc:HGNC:4028]                    | chr10 | 43371642  | 43376335  | 826   |
| FSIP2      | -0.719049991 | 1.24632E-09 | 7.14417E-09 | DOWN   | fibrous sheath interacting protein 2 [Source:HGNC Symbol;Acc:HGNC:21675]                              | chr2  | 185738895 | 185833290 | 20788 |
| CILP2      | -0.592880096 | 1.26965E-09 | 7.26643E-09 | DOWN   | cartilage intermediate layer protein 2 [Source:HGNC Symbol;Acc:HGNC:24213]                            | chr19 | 19538248  | 19546659  | 4234  |
| NDNF       | -0.750672751 | 1.32539E-09 | 7.56634E-09 | DOWN   | neuron derived neurotrophic factor [Source:HGNC Symbol;Acc:HGNC:26256]                                | chr4  | 121035613 | 121072518 | 2885  |

| PARAM      | logFC        | pval        | pval.adj    | UPDOWN | desc                                                                                                  | chr   | start     | end       | size  |
|------------|--------------|-------------|-------------|--------|-------------------------------------------------------------------------------------------------------|-------|-----------|-----------|-------|
| CLECT5A    | 0.639801599  | 1.32766E-09 | 7.57454E-09 | UP     | C-type lectin domain containing 5A [Source:HGNC Symbol;Acc:HGNC:2054]                                 | chr7  | 141927357 | 141946983 | 3724  |
| CKMT1A     | -0.750496386 | 1.35022E-09 | 7.69594E-09 | DOWN   | creatine kinase, mitochondrial 1A [Source:HGNC Symbol;Acc:HGNC:31736]                                 | chr15 | 43692886  | 43699222  | 2150  |
| HNF1B      | -1.23393968  | 1.35111E-09 | 7.69859E-09 | DOWN   | HNF1 homeobox B [Source:HGNC Symbol;Acc:HGNC:11630]                                                   | chr17 | 37686432  | 37745247  | 2978  |
| AC112484.1 | -0.73743657  | 1.38566E-09 | 7.88062E-09 | DOWN   | Uncharacterized protein FLI43738 [Source:UniProtKB/Swiss-Prot;Acc:Q6ZUG5]                             | chr3  | 128909874 | 128971330 | 2291  |
| MYCN       | -0.793949641 | 1.49033E-09 | 8.44678E-09 | DOWN   | MYCN proto-oncogene, bHLH transcription factor [Source:HGNC Symbol;Acc:HGNC:7559]                     | chr2  | 15940564  | 15947007  | 2602  |
| BMP2       | -0.600816104 | 1.5407E-09  | 8.72403E-09 | DOWN   | bone morphogenetic protein 2 [Source:HGNC Symbol;Acc:HGNC:1069]                                       | chr20 | 6767664   | 6780280   | 3601  |
| TSSK1B     | -0.601066667 | 1.60135E-09 | 9.04488E-09 | DOWN   | testis specific serine kinase 1B [Source:HGNC Symbol;Acc:HGNC:14968]                                  | chr5  | 113432554 | 113435031 | 2478  |
| PEG3       | -0.615703178 | 1.63996E-09 | 9.2543E-09  | DOWN   | paternally expressed 3 [Source:HGNC Symbol;Acc:HGNC:8826]                                             | chr19 | 56810083  | 56840726  | 8759  |
| KRT6A      | 1.672656976  | 1.69535E-09 | 9.54312E-09 | UP     | keratin 6A [Source:HGNC Symbol;Acc:HGNC:6443]                                                         | chr12 | 52487174  | 52493257  | 2310  |
| IGFBP2     | -0.620728966 | 1.72498E-09 | 9.69487E-09 | DOWN   | insulin like growth factor binding protein 2 [Source:HGNC Symbol;Acc:HGNC:5471]                       | chr2  | 216633395 | 216664436 | 1568  |
| ZYG11A     | 0.823438586  | 1.76865E-09 | 9.92184E-09 | UP     | zyg-11 family member A, cell cycle regulator [Source:HGNC Symbol;Acc:HGNC:32058]                      | chr1  | 52842511  | 52894998  | 4694  |
| PDZD3      | -0.869437932 | 1.84031E-09 | 1.03047E-08 | DOWN   | PDZ domain containing 3 [Source:HGNC Symbol;Acc:HGNC:19891]                                           | chr11 | 119185475 | 119190223 | 2996  |
| SGSM1      | -0.596496776 | 1.86038E-09 | 1.04139E-08 | DOWN   | small G protein signaling modulator 1 [Source:HGNC Symbol;Acc:HGNC:29410]                             | chr22 | 24806169  | 24927578  | 6908  |
| AC011498.4 | -0.62214438  | 1.88036E-09 | 1.05192E-08 | DOWN   |                                                                                                       | chr19 | 4528427   | 4540067   | 1803  |
| RSPQ3      | 0.744001713  | 1.90848E-09 | 1.06732E-08 | UP     | R-spondin 3 [Source:HGNC Symbol;Acc:HGNC:20866]                                                       | chr6  | 127118604 | 127197765 | 3037  |
| LINC00482  | -0.701657198 | 1.92925E-09 | 1.07827E-08 | DOWN   | long intergenic non-protein coding RNA 482 [Source:HGNC Symbol;Acc:HGNC:26816]                        | chr17 | 81303771  | 81309248  | 2023  |
| SH3TC2     | -0.665733128 | 2.03354E-09 | 1.13203E-08 | DOWN   | SH3 domain and tetratricopeptide repeats 2 [Source:HGNC Symbol;Acc:HGNC:29427]                        | chr5  | 149003953 | 149063124 | 6261  |
| FSCB       | -0.74592277  | 2.06401E-09 | 1.14863E-08 | DOWN   | fibrous sheath CABYR binding protein [Source:HGNC Symbol;Acc:HGNC:20494]                              | chr14 | 44504342  | 44507279  | 2938  |
| FAM189A1   | -0.831272186 | 2.10038E-09 | 1.16673E-08 | DOWN   | family with sequence similarity 189 member A1 [Source:HGNC Symbol;Acc:HGNC:29075]                     | chr15 | 29120254  | 29570723  | 4705  |
| TRHDE-AS1  | -0.920556958 | 2.24908E-09 | 1.24551E-08 | DOWN   | TRHDE antisense RNA 1 [Source:HGNC Symbol;Acc:HGNC:27471]                                             | chr12 | 72253513  | 72274907  | 6310  |
| MAK        | 0.633653771  | 2.33012E-09 | 1.28725E-08 | UP     | male germ cell associated kinase [Source:HGNC Symbol;Acc:HGNC:6816]                                   | chr6  | 10762723  | 10838555  | 4226  |
| FREM1      | -0.640411059 | 2.35373E-09 | 1.29871E-08 | DOWN   | FRAS1 related extracellular matrix 1 [Source:HGNC Symbol;Acc:HGNC:23399]                              | chr9  | 14734666  | 14910995  | 10419 |
| LG5        | -1.046011962 | 2.41344E-09 | 1.33044E-08 | DOWN   | leucine rich repeat containing G protein-coupled receptor 5 [Source:HGNC Symbol;Acc:HGNC:4504]        | chr12 | 71439770  | 71586310  | 4611  |
| SIM2       | -0.834695991 | 2.53242E-09 | 1.39179E-08 | DOWN   | single-minded family bHLH transcription factor 2 [Source:HGNC Symbol;Acc:HGNC:10883]                  | chr21 | 36699134  | 36749917  | 4442  |
| AC099676.1 | -0.646409495 | 2.73435E-09 | 1.49868E-08 | DOWN   |                                                                                                       | chr1  | 201995696 | 201996352 | 657   |
| FSD1       | 0.64428352   | 2.84661E-09 | 1.55692E-08 | UP     | fibronectin type III and SPRY domain containing 1 [Source:HGNC Symbol;Acc:HGNC:13745]                 | chr19 | 4304600   | 4323836   | 1831  |
| CACNA15    | -0.815656741 | 2.93473E-09 | 1.60222E-08 | DOWN   | calcium voltage-gated channel subunit alpha1 5 [Source:HGNC Symbol;Acc:HGNC:1397]                     | chr1  | 201039512 | 201112566 | 6168  |
| PPP1R1B    | -1.089132435 | 3.14225E-09 | 1.71036E-08 | DOWN   | protein phosphatase 1 regulatory inhibitor subunit 1B [Source:HGNC Symbol;Acc:HGNC:9287]              | chr17 | 39626740  | 39636626  | 2238  |
| GRHL2      | -0.838495514 | 3.30277E-09 | 1.79235E-08 | DOWN   | grainyhead like transcription factor 2 [Source:HGNC Symbol;Acc:HGNC:2799]                             | chr8  | 101492432 | 101669726 | 5299  |
| CPAMD8     | -0.821530641 | 3.37723E-09 | 1.82893E-08 | DOWN   | C3 and PZP like, alpha-2-macroglobulin domain containing 8 [Source:HGNC Symbol;Acc:HGNC:23228]        | chr19 | 16892947  | 17026815  | 6002  |
| HOXB6      | -0.624508774 | 3.38062E-09 | 1.83022E-08 | DOWN   | homeobox B6 [Source:HGNC Symbol;Acc:HGNC:5117]                                                        | chr17 | 48595751  | 48604992  | 1960  |
| UGT1A9     | -1.123881626 | 3.38417E-09 | 1.8316E-08  | DOWN   | UDP glucuronosyltransferase family 1 member A9 [Source:HGNC Symbol;Acc:HGNC:12541]                    | chr2  | 233671853 | 233773300 | 2416  |
| NECTIN4    | -0.761377481 | 3.52115E-09 | 1.90006E-08 | DOWN   | nectin cell adhesion molecule 4 [Source:HGNC Symbol;Acc:HGNC:19688]                                   | chr1  | 161070995 | 161089599 | 3502  |
| DNASE1L3   | 0.738688901  | 3.75766E-09 | 2.02347E-08 | UP     | deoxyribonuclease 1 like 3 [Source:HGNC Symbol;Acc:HGNC:2959]                                         | chr3  | 58192257  | 58214697  | 2689  |
| DCSTAMP    | 0.771073874  | 3.77447E-09 | 2.03071E-08 | UP     | dendrocyte expressed seven transmembrane protein [Source:HGNC Symbol;Acc:HGNC:18549]                  | chr8  | 104339796 | 104356689 | 1983  |
| PDZK1IP1   | 1.072268532  | 3.81735E-09 | 2.05256E-08 | UP     | PDZK1 interacting protein 1 [Source:HGNC Symbol;Acc:HGNC:16887]                                       | chr1  | 47183593  | 47191044  | 1191  |
| ATP1A3     | 0.641390903  | 3.90825E-09 | 2.09833E-08 | UP     | ATPase Na <sup>+</sup> /K <sup>+</sup> transporting subunit alpha 3 [Source:HGNC Symbol;Acc:HGNC:801] | chr19 | 41966582  | 41994276  | 3771  |
| ZDHHC11B   | -0.739617416 | 3.95701E-09 | 2.12325E-08 | DOWN   | zinc finger DHHC-type containing 11B [Source:HGNC Symbol;Acc:HGNC:32962]                              | chr5  | 711808    | 766952    | 2682  |
| CAPNS2     | -0.700967101 | 3.99652E-09 | 2.14254E-08 | DOWN   | calpain small subunit 2 [Source:HGNC Symbol;Acc:HGNC:16371]                                           | chr16 | 55566672  | 55567687  | 1016  |
| DACH1      | -0.611530907 | 3.99817E-09 | 2.1428E-08  | DOWN   | dachshund family transcription factor 1 [Source:HGNC Symbol;Acc:HGNC:2663]                            | chr13 | 71437966  | 71867192  | 5389  |
| RIPPLY3    | -0.667851332 | 4.00895E-09 | 2.14794E-08 | DOWN   | rippy transcriptional repressor 3 [Source:HGNC Symbol;Acc:HGNC:3047]                                  | chr21 | 37006563  | 37019659  | 2235  |
| TBX1       | -0.66631439  | 4.10453E-09 | 2.19461E-08 | DOWN   | T-box 1 [Source:HGNC Symbol;Acc:HGNC:11592]                                                           | chr22 | 19756703  | 19783593  | 2811  |
| AC104117.3 | -0.591686049 | 4.21809E-09 | 2.25334E-08 | DOWN   |                                                                                                       | chr5  | 178969390 | 178990116 | 674   |
| ELN        | -0.600553765 | 4.38972E-09 | 2.34157E-08 | DOWN   | elastin [Source:HGNC Symbol;Acc:HGNC:3327]                                                            | chr7  | 74027789  | 74069907  | 4000  |
| AC093840.1 | -0.726973075 | 4.4749E-09  | 2.38518E-08 | DOWN   |                                                                                                       | chr4  | 181522666 | 181523001 | 336   |
| GRIN2C     | -0.758989733 | 4.88967E-09 | 2.59528E-08 | DOWN   | glutamate ionotropic receptor NMDA type subunit 2C [Source:HGNC Symbol;Acc:HGNC:4587]                 | chr17 | 74842023  | 74860535  | 4592  |
| UGT3A2     | 0.768529019  | 5.02693E-09 | 2.66345E-08 | UP     | UDP glycosyltransferase family 3 member A2 [Source:HGNC Symbol;Acc:HGNC:27266]                        | chr5  | 36035017  | 36066891  | 2355  |
| SLC28A3    | 0.776538264  | 5.05915E-09 | 2.67974E-08 | UP     | solute carrier family 28 member 3 [Source:HGNC Symbol;Acc:HGNC:16484]                                 | chr9  | 84275457  | 84340683  | 4887  |
| HS6ST2     | -0.752030404 | 5.47792E-09 | 2.88806E-08 | DOWN   | heparan sulfate 6-O-sulfotransferase 2 [Source:HGNC Symbol;Acc:HGNC:19133]                            | chrX  | 132962016 | 132961395 | 4615  |
| SERPINB4   | 1.286938721  | 5.76826E-09 | 3.03143E-08 | UP     | serpin family B member 4 [Source:HGNC Symbol;Acc:HGNC:10570]                                          | chr18 | 63637259  | 63644298  | 1749  |
| PM20D1     | -1.18142868  | 5.97387E-09 | 3.13676E-08 | DOWN   | peptidase M20 domain containing 1 [Source:HGNC Symbol;Acc:HGNC:26518]                                 | chr1  | 205828022 | 205850117 | 2152  |
| RARRES1    | 0.64875536   | 5.97747E-09 | 3.13774E-08 | UP     | retinoic acid receptor responder 1 [Source:HGNC Symbol;Acc:HGNC:9867]                                 | chr3  | 158696892 | 158732696 | 2092  |
| HLA-V      | 0.756022663  | 6.13528E-09 | 3.21313E-08 | UP     | major histocompatibility complex, class V, V [pseudogene] [Source:HGNC Symbol;Acc:HGNC:23482]         | chr6  | 29790954  | 29797811  | 5662  |
| DNAL1      | -0.593946249 | 6.49379E-09 | 3.39012E-08 | DOWN   | dynein axonemal light intermediate chain 1 [Source:HGNC Symbol;Acc:HGNC:14353]                        | chr1  | 37556919  | 37566857  | 2649  |
| ADRB1      | -0.691659581 | 6.60728E-09 | 3.44639E-08 | DOWN   | adrenoceptor beta 1 [Source:HGNC Symbol;Acc:HGNC:285]                                                 | chr10 | 114044056 | 114046908 | 2853  |
| SOWAHA     | -0.653197037 | 6.64771E-09 | 3.46648E-08 | DOWN   | so sondowah ankyrin repeat domain family member A [Source:HGNC Symbol;Acc:HGNC:27033]                 | chr5  | 132813587 | 132816797 | 3211  |
| NPC1L1     | -0.77877195  | 6.67463E-09 | 3.47852E-08 | DOWN   | NPC1 like intracellular cholesterol transporter 1 [Source:HGNC Symbol;Acc:HGNC:7898]                  | chr7  | 44512535  | 44541315  | 5252  |



| PARAM       | logFC        | pval        | pval.adj    | UPDOWN | desc                                                                                                                  | chr   | start     | end       | size  |
|-------------|--------------|-------------|-------------|--------|-----------------------------------------------------------------------------------------------------------------------|-------|-----------|-----------|-------|
| PRSS35      | -0.660072831 | 6.9093E-09  | 3.59668E-08 | DOWN   | protease, serine 35 [Source:HGNC Symbol;Acc:HGNC:21387]                                                               | chr6  | 83512538  | 83525704  | 2440  |
| B3GALT5-AS1 | -0.729982276 | 7.30093E-09 | 3.79217E-08 | DOWN   | B3GALT5 antisense RNA 1 [Source:HGNC Symbol;Acc:HGNC:16424]                                                           | chr21 | 39597147  | 39612821  | 2516  |
| C4orf19     | -0.66567637  | 7.44609E-09 | 3.85839E-08 | DOWN   | chromosome 4 open reading frame 19 [Source:HGNC Symbol;Acc:HGNC:25618]                                                | chr4  | 37453941  | 37623495  | 2770  |
| UCA1        | -0.818451246 | 7.4644E-09  | 3.86677E-08 | DOWN   | urothelial cancer associated 1 (non-protein coding) [Source:HGNC Symbol;Acc:HGNC:37126]                               | chr19 | 15828961  | 15836320  | 2299  |
| ABO         | -0.762398856 | 7.84165E-09 | 4.05409E-08 | DOWN   | ABO, alpha 1-3-N-acetylgalactosaminyltransferase and alpha 1-3-galactosyltransferase [Source:HGNC Symbol;Acc:HGNC:79] | chr9  | 133255176 | 133275214 | 1577  |
| LONRF2      | -0.772830938 | 8.18655E-09 | 4.22879E-08 | DOWN   | LON peptidase N-terminal domain and ring finger 2 [Source:HGNC Symbol;Acc:HGNC:24788]                                 | chr2  | 100273291 | 100322733 | 13933 |
| KRT7        | -0.940342868 | 8.28865E-09 | 4.27787E-08 | DOWN   | keratin 7 [Source:HGNC Symbol;Acc:HGNC:6445]                                                                          | chr12 | 52233114  | 52248921  | 1754  |
| SYNE4       | -0.599246013 | 8.298E-09   | 4.28148E-08 | DOWN   | spectrin repeat containing nuclear envelope family member 4 [Source:HGNC Symbol;Acc:HGNC:26703]                       | chr19 | 36003310  | 36008793  | 1354  |
| OR13A1      | -0.607098293 | 8.35281E-09 | 4.3073E-08  | DOWN   | olfactory receptor family 13 subfamily A member 1 [Source:HGNC Symbol;Acc:HGNC:14772]                                 | chr10 | 45302298  | 45315608  | 2689  |
| PRSS22      | -0.688549786 | 9.34224E-09 | 4.78351E-08 | DOWN   | protease, serine 22 [Source:HGNC Symbol;Acc:HGNC:14368]                                                               | chr16 | 2852727   | 2858170   | 1386  |
| PCP4L1      | -0.825657123 | 1.00993E-08 | 5.15803E-08 | DOWN   | Purkinje cell protein 4 like 1 [Source:HGNC Symbol;Acc:HGNC:20448]                                                    | chr1  | 161258727 | 161285450 | 1424  |
| GATA3       | -0.697814005 | 1.05956E-08 | 5.39633E-08 | DOWN   | GATA binding protein 3 [Source:HGNC Symbol;Acc:HGNC:4172]                                                             | chr10 | 8054693   | 8075198   | 3078  |
| FRRS11      | -0.739182605 | 1.08277E-08 | 5.50523E-08 | DOWN   | ferric chelate reductase 1 like [Source:HGNC Symbol;Acc:HGNC:1362]                                                    | chr9  | 109130293 | 109167291 | 8197  |
| FCER2       | 0.761594986  | 1.08721E-08 | 5.5247E-08  | UP     | Fc fragment of IgE receptor II [Source:HGNC Symbol;Acc:HGNC:3612]                                                     | chr19 | 7688758   | 7702146   | 1721  |
| UGT1A8      | -1.016261386 | 1.22772E-08 | 6.20224E-08 | DOWN   | UDP glucuronosyltransferase family 1 member A8 [Source:HGNC Symbol;Acc:HGNC:12540]                                    | chr2  | 233617645 | 233773310 | 2407  |
| ACO20659.1  | 0.614644579  | 1.26191E-08 | 6.3643E-08  | UP     |                                                                                                                       | chr15 | 41892793  | 41898575  | 3410  |
| RPL39L      | 0.623234828  | 1.2844E-08  | 6.47415E-08 | UP     | ribosomal protein L39 like [Source:HGNC Symbol;Acc:HGNC:17094]                                                        | chr3  | 187120948 | 187180908 | 1060  |
| TFPC2L1     | -0.618425594 | 1.29613E-08 | 6.52602E-08 | DOWN   | transcription factor CP2 like 1 [Source:HGNC Symbol;Acc:HGNC:17925]                                                   | chr2  | 121216587 | 121285207 | 9292  |
| SVOPL       | -0.684473336 | 1.32828E-08 | 6.68231E-08 | DOWN   | SVOPL like [Source:HGNC Symbol;Acc:HGNC:27034]                                                                        | chr7  | 138594285 | 138701352 | 2035  |
| ADGRF4      | -0.715287807 | 1.60715E-08 | 8.02512E-08 | DOWN   | adhesion G protein-coupled receptor F4 [Source:HGNC Symbol;Acc:HGNC:19011]                                            | chr6  | 47685864  | 47722201  | 3391  |
| UGT1A7      | -1.044257402 | 1.62527E-08 | 8.11112E-08 | DOWN   | UDP glucuronosyltransferase family 1 member A7 [Source:HGNC Symbol;Acc:HGNC:12539]                                    | chr2  | 233681938 | 233773299 | 2333  |
| UGT2B15     | -1.064029149 | 1.75799E-08 | 8.74463E-08 | DOWN   | UDP glucuronosyltransferase family 2 member B15 [Source:HGNC Symbol;Acc:HGNC:12546]                                   | chr4  | 68646630  | 68670628  | 2077  |
| EPS8L3      | -1.159893343 | 1.7997E-08  | 8.93737E-08 | DOWN   | EPS8 like 3 [Source:HGNC Symbol;Acc:HGNC:21297]                                                                       | chr1  | 109750080 | 109764027 | 2326  |
| CKMT2       | -0.639770582 | 1.82952E-08 | 9.0755E-08  | DOWN   | creatine kinase, mitochondrial 2 [Source:HGNC Symbol;Acc:HGNC:1996]                                                   | chr5  | 81233285  | 81266397  | 1680  |
| TMEM163     | -0.6207354   | 1.97495E-08 | 9.75158E-08 | DOWN   | transmembrane protein 163 [Source:HGNC Symbol;Acc:HGNC:25380]                                                         | chr2  | 134455759 | 134719000 | 1892  |
| SPOCD1      | -0.607292734 | 2.05088E-08 | 1.011E-07   | DOWN   | SPOC domain containing 1 [Source:HGNC Symbol;Acc:HGNC:26338]                                                          | chr1  | 31790422  | 31816051  | 3965  |
| FA2H        | -0.693932378 | 2.08971E-08 | 1.02888E-07 | DOWN   | fatty acid 2-hydroxylase [Source:HGNC Symbol;Acc:HGNC:21197]                                                          | chr16 | 74712955  | 74774825  | 2424  |
| EMX2        | -0.817398278 | 2.15576E-08 | 1.05924E-07 | DOWN   | empty spiracles homeobox 2 [Source:HGNC Symbol;Acc:HGNC:3341]                                                         | chr10 | 117542444 | 117549546 | 2897  |
| TDRO15      | 0.632213959  | 2.16919E-08 | 1.06555E-07 | UP     | tudor domain containing 15 [Source:HGNC Symbol;Acc:HGNC:45037]                                                        | chr2  | 21123917  | 21143272  | 6135  |
| ROBO2       | -0.613640882 | 2.18744E-08 | 1.07394E-07 | DOWN   | roundabout guidance receptor 2 [Source:HGNC Symbol;Acc:HGNC:10250]                                                    | chr3  | 75906695  | 77649964  | 9521  |
| KRT6C       | 1.314961333  | 2.22781E-08 | 1.09228E-07 | UP     | keratin 6C [Source:HGNC Symbol;Acc:HGNC:20406]                                                                        | chr12 | 52468516  | 52473785  | 2289  |
| ATP10B      | -0.901614356 | 2.23321E-08 | 1.09463E-07 | DOWN   | ATPase phospholipid transporting 10B (putative) [Source:HGNC Symbol;Acc:HGNC:13543]                                   | chr5  | 160563120 | 160852212 | 7566  |
| KPRP        | -0.892307964 | 2.367E-08   | 1.15708E-07 | DOWN   | keratinocyte proline rich protein [Source:HGNC Symbol;Acc:HGNC:31823]                                                 | chr1  | 152759561 | 152762052 | 2492  |
| FOXD3       | 0.807627911  | 2.63345E-08 | 1.27974E-07 | UP     | forkhead box D3 [Source:HGNC Symbol;Acc:HGNC:3804]                                                                    | chr1  | 63323041  | 63325126  | 2086  |
| STEAP1B     | 0.603842336  | 2.89753E-08 | 1.39928E-07 | UP     | STEAP family member 1B [Source:HGNC Symbol;Acc:HGNC:41907]                                                            | chr7  | 22419444  | 22500498  | 1908  |
| ANXA9       | -0.69580147  | 2.93307E-08 | 1.4151E-07  | DOWN   | annexin A9 [Source:HGNC Symbol;Acc:HGNC:547]                                                                          | chr1  | 150982017 | 150995634 | 1826  |
| GPR39       | -0.663775715 | 3.0649E-08  | 1.47556E-07 | DOWN   | G protein-coupled receptor 39 [Source:HGNC Symbol;Acc:HGNC:4496]                                                      | chr2  | 132416574 | 132646559 | 2828  |
| AQP9        | 0.629842735  | 3.13365E-08 | 1.50666E-07 | UP     | aquaporin 9 [Source:HGNC Symbol;Acc:HGNC:643]                                                                         | chr15 | 58138169  | 58185911  | 3061  |
| FRMPD4      | -0.726411035 | 3.16634E-08 | 1.52117E-07 | DOWN   | FERM and PDZ domain containing 4 [Source:HGNC Symbol;Acc:HGNC:29007]                                                  | chrX  | 12138466  | 12724523  | 8478  |
| PNMA3       | 0.616678645  | 3.43816E-08 | 1.64392E-07 | UP     | paraneoplastic Ma antigen 3 [Source:HGNC Symbol;Acc:HGNC:18742]                                                       | chrX  | 153056409 | 153060467 | 3734  |
| HPGD        | -0.766932088 | 3.47232E-08 | 1.65806E-07 | DOWN   | hydroxyprostaglandin dehydrogenase 15-(NAD) [Source:HGNC Symbol;Acc:HGNC:5154]                                        | chr4  | 174490177 | 174523065 | 4635  |
| IHH         | -0.955069489 | 3.788E-08   | 1.80405E-07 | DOWN   | indian hedgehog [Source:HGNC Symbol;Acc:HGNC:5956]                                                                    | chr2  | 219054420 | 219060467 | 2023  |
| FUT3        | -0.802496151 | 3.92685E-08 | 1.86773E-07 | DOWN   | fucosyltransferase 3 (Lewis blood group) [Source:HGNC Symbol;Acc:HGNC:4014]                                           | chr19 | 5842888   | 5851474   | 2590  |
| CCNA1       | 0.790426453  | 4.3939E-08  | 2.0795E-07  | UP     | cyclin A1 [Source:HGNC Symbol;Acc:HGNC:1577]                                                                          | chr13 | 36431520  | 36442882  | 2400  |
| SIGLEC14    | 0.6904855    | 4.66733E-08 | 2.20087E-07 | UP     | sialic acid binding Ig like lectin 14 [Source:HGNC Symbol;Acc:HGNC:32926]                                             | chr19 | 51642553  | 51646801  | 2035  |
| FAM155B     | -0.746035142 | 4.80689E-08 | 2.26432E-07 | DOWN   | family with sequence similarity 155 member B [Source:HGNC Symbol;Acc:HGNC:30701]                                      | chrX  | 69505241  | 69532508  | 4013  |
| CXCL3       | 0.668424794  | 4.83556E-08 | 2.27546E-07 | UP     | C-X-C motif chemokine ligand 3 [Source:HGNC Symbol;Acc:HGNC:4604]                                                     | chr4  | 74036589  | 74038689  | 1075  |
| TFPI1       | -1.202535755 | 5.37229E-08 | 2.51497E-07 | DOWN   | trefoil factor 1 [Source:HGNC Symbol;Acc:HGNC:11755]                                                                  | chr21 | 42362282  | 42366594  | 551   |
| FABP6       | -0.782477263 | 5.57466E-08 | 2.60412E-07 | DOWN   | fatty acid binding protein 6 [Source:HGNC Symbol;Acc:HGNC:3561]                                                       | chr5  | 160187367 | 160238735 | 872   |
| SYT10       | -0.753736372 | 5.80626E-08 | 2.70695E-07 | DOWN   | synaptotagmin 10 [Source:HGNC Symbol;Acc:HGNC:19266]                                                                  | chr12 | 33374238  | 33439819  | 4461  |
| DAW1        | 0.852686142  | 5.93199E-08 | 2.75989E-07 | UP     | dynein assembly factor with WD repeats 1 [Source:HGNC Symbol;Acc:HGNC:26383]                                          | chr2  | 227871607 | 227924341 | 1704  |
| TTT         | -1.430066836 | 6.48559E-08 | 3.00435E-07 | DOWN   | transthyretin [Source:HGNC Symbol;Acc:HGNC:12405]                                                                     | chr18 | 31591726  | 31599021  | 1081  |
| ZDHC8P1     | -0.681975371 | 6.58236E-08 | 3.04606E-07 | DOWN   | zinc finger DHHC-type containing 8 pseudogene 1 [Source:HGNC Symbol;Acc:HGNC:26461]                                   | chr22 | 23939060  | 23402726  | 2888  |
| FXYD3       | -0.771600454 | 6.81225E-08 | 3.14362E-07 | DOWN   | FXYD domain containing ion transport regulator 3 [Source:HGNC Symbol;Acc:HGNC:4027]                                   | chr19 | 35115879  | 35124324  | 2862  |
| VWA2        | -0.762234976 | 6.86805E-08 | 3.16695E-07 | DOWN   | von Willebrand factor A domain containing 2 [Source:HGNC Symbol;Acc:HGNC:24709]                                       | chr10 | 114239330 | 114291513 | 3182  |
| MELTF       | 0.649538944  | 7.50485E-08 | 3.44395E-07 | UP     | melanotransferrin [Source:HGNC Symbol;Acc:HGNC:7037]                                                                  | chr3  | 197001740 | 197029816 | 4812  |
| TFPI2       | 0.779446023  | 7.70152E-08 | 3.52706E-07 | UP     | tissue factor pathway inhibitor 2 [Source:HGNC Symbol;Acc:HGNC:11761]                                                 | chr7  | 93885397  | 93890991  | 2444  |

| PARAM      | logFC        | pval        | pval.adj    | UPDOWN | desc                                                                                     | chr   | start     | end       | size  |
|------------|--------------|-------------|-------------|--------|------------------------------------------------------------------------------------------|-------|-----------|-----------|-------|
| GYG2P1     | -0.76444261  | 7.78623E-08 | 3.56136E-07 | DOWN   | glycogenin 2 pseudogene 1 [Source:HGNC Symbol;Acc:HGNC:4701]                             | chrY  | 12354416  | 12420456  | 979   |
| KISS1      | -0.636011444 | 8.17657E-08 | 3.72954E-07 | DOWN   | KISS-1 metastasis-suppressor [Source:HGNC Symbol;Acc:HGNC:6341]                          | chr1  | 204190341 | 204196486 | 709   |
| PROM2      | -0.594262697 | 8.23656E-08 | 3.75502E-07 | DOWN   | prominin 2 [Source:HGNC Symbol;Acc:HGNC:20685]                                           | chr2  | 95274453  | 95291308  | 4733  |
| SBK1       | -0.600452747 | 8.25168E-08 | 3.76096E-07 | DOWN   | SH3 domain binding kinase 1 [Source:HGNC Symbol;Acc:HGNC:17699]                          | chr16 | 28292519  | 28323849  | 4992  |
| COL19A1    | 0.693865413  | 8.34678E-08 | 3.79954E-07 | UP     | collagen type XIX alpha 1 chain [Source:HGNC Symbol;Acc:HGNC:2196]                       | chr6  | 69866571  | 70209196  | 6699  |
| TIJ3       | -0.647311026 | 8.38775E-08 | 3.81531E-07 | DOWN   | tight junction protein 3 [Source:HGNC Symbol;Acc:HGNC:11829]                             | chr19 | 3708109   | 3750813   | 3573  |
| GPR78      | -0.801915889 | 8.4253E-08  | 3.82855E-07 | DOWN   | G protein-coupled receptor 78 [Source:HGNC Symbol;Acc:HGNC:4528]                         | chr4  | 8580566   | 8587548   | 1694  |
| GRIK3      | -0.701386618 | 8.66423E-08 | 3.93318E-07 | DOWN   | glutamate ionotropic receptor kainate type subunit 3 [Source:HGNC Symbol;Acc:HGNC:4581]  | chr1  | 36795527  | 37034129  | 9474  |
| HOXB8      | -0.786853289 | 8.9572E-08  | 4.05612E-07 | DOWN   | homeobox B8 [Source:HGNC Symbol;Acc:HGNC:5119]                                           | chr17 | 48612346  | 48614939  | 1823  |
| NOTUM      | -0.710138611 | 9.041E-08   | 4.09192E-07 | DOWN   | NOTUM, palmitoleyl-protein carboxylesterase [Source:HGNC Symbol;Acc:HGNC:27106]          | chr17 | 81952507  | 81961293  | 2329  |
| GJB6       | -0.940502231 | 9.3535E-08  | 4.23019E-07 | DOWN   | gap junction protein beta 6 [Source:HGNC Symbol;Acc:HGNC:4288]                           | chr13 | 20221971  | 20232395  | 2646  |
| FAM183A    | -0.610744374 | 9.76032E-08 | 4.4032E-07  | DOWN   | family with sequence similarity 183 member A [Source:HGNC Symbol;Acc:HGNC:34347]         | chr1  | 43145153  | 43156396  | 633   |
| FMO2       | 0.659079957  | 9.90687E-08 | 4.46597E-07 | UP     | flavin containing monooxygenase 2 [Source:HGNC Symbol;Acc:HGNC:3770]                     | chr1  | 171185208 | 171211230 | 3851  |
| PVALB      | -0.833655908 | 1.12486E-07 | 5.04197E-07 | DOWN   | parvalbumin [Source:HGNC Symbol;Acc:HGNC:9704]                                           | chr22 | 36800684  | 36819479  | 645   |
| DPY19L2P2  | 0.628537072  | 1.19203E-07 | 5.32331E-07 | UP     | DPY19L2 pseudogene 2 [Source:HGNC Symbol;Acc:HGNC:21764]                                 | chr7  | 103175133 | 103280410 | 4453  |
| SERPINB2   | 0.906188916  | 1.24184E-07 | 5.5376E-07  | UP     | serpin family B member 2 [Source:HGNC Symbol;Acc:HGNC:8584]                              | chr18 | 63887700  | 63903890  | 2171  |
| NRG4       | -0.715090918 | 1.36189E-07 | 6.04614E-07 | DOWN   | neuregulin 4 [Source:HGNC Symbol;Acc:HGNC:29862]                                         | chr15 | 75943009  | 76012444  | 1159  |
| TFR2       | -0.615292737 | 1.37577E-07 | 6.10476E-07 | DOWN   | transferrin receptor 2 [Source:HGNC Symbol;Acc:HGNC:11762]                               | chr7  | 100620416 | 100642721 | 3135  |
| KCNH8      | -0.73872032  | 1.37826E-07 | 6.11284E-07 | DOWN   | potassium voltage-gated channel subfamily H member 8 [Source:HGNC Symbol;Acc:HGNC:18864] | chr3  | 19148454  | 19535646  | 5137  |
| CNTNAP3    | 0.626063211  | 1.50702E-07 | 6.65947E-07 | UP     | contactin associated protein like 3 [Source:HGNC Symbol;Acc:HGNC:13834]                  | chr9  | 39072767  | 39288303  | 7056  |
| KCNH2      | -0.625054584 | 1.61025E-07 | 7.09486E-07 | DOWN   | potassium voltage-gated channel subfamily H member 2 [Source:HGNC Symbol;Acc:HGNC:6251]  | chr7  | 150944961 | 150978315 | 5066  |
| MYRIP      | -0.598347673 | 1.63968E-07 | 7.21749E-07 | DOWN   | myosin VIIA and Rab interacting protein [Source:HGNC Symbol;Acc:HGNC:19156]              | chr3  | 39808914  | 40260321  | 5385  |
| GJC3       | -0.648319964 | 1.70328E-07 | 7.48085E-07 | DOWN   | gap junction protein gamma 3 [Source:HGNC Symbol;Acc:HGNC:17495]                         | chr7  | 99923269  | 99929620  | 1116  |
| POPCD3     | 0.786888445  | 1.86255E-07 | 8.12949E-07 | UP     | popcye domain containing 3 [Source:HGNC Symbol;Acc:HGNC:17649]                           | chr6  | 105158280 | 105179860 | 1345  |
| SERPINB7   | 0.880095634  | 1.93767E-07 | 8.43504E-07 | UP     | serpin family B member 7 [Source:HGNC Symbol;Acc:HGNC:13902]                             | chr18 | 63753047  | 63805376  | 2367  |
| DLX3       | -0.696039228 | 1.95444E-07 | 8.50394E-07 | DOWN   | distal-less homeobox 3 [Source:HGNC Symbol;Acc:HGNC:2916]                                | chr17 | 49990005  | 49995224  | 2715  |
| CYP4F11    | -0.878284419 | 2.02912E-07 | 8.80775E-07 | DOWN   | cytochrome P450 family 4 subfamily F member 11 [Source:HGNC Symbol;Acc:HGNC:13265]       | chr19 | 15912367  | 15934867  | 4027  |
| SAA1       | 0.974019469  | 2.17574E-07 | 9.39693E-07 | UP     | serum amyloid A1 [Source:HGNC Symbol;Acc:HGNC:10513]                                     | chr11 | 18266174  | 18269977  | 765   |
| GJB1       | -1.055906833 | 2.21859E-07 | 9.57059E-07 | DOWN   | gap junction protein beta 1 [Source:HGNC Symbol;Acc:HGNC:4283]                           | chrX  | 71215194  | 71225516  | 2052  |
| WIF1       | -0.970167847 | 2.27123E-07 | 9.78138E-07 | DOWN   | WNT inhibitory factor 1 [Source:HGNC Symbol;Acc:HGNC:18081]                              | chr12 | 65050626  | 65121566  | 2238  |
| C9orf152   | -0.871312235 | 2.2895E-07  | 9.85072E-07 | DOWN   | chromosome 9 open reading frame 152 [Source:HGNC Symbol;Acc:HGNC:31455]                  | chr9  | 110199561 | 110208189 | 2717  |
| TFF3       | -1.084338092 | 2.2984E-07  | 9.88433E-07 | DOWN   | trefoil factor 3 [Source:HGNC Symbol;Acc:HGNC:11757]                                     | chr21 | 42311667  | 42315651  | 1113  |
| CECR2      | -0.658260503 | 2.36367E-07 | 1.01482E-06 | DOWN   | CECR2, histone acetyl-lysine reader [Source:HGNC Symbol;Acc:HGNC:1840]                   | chr22 | 17359949  | 17558149  | 10324 |
| ARHGAP40   | -0.730691771 | 2.53278E-07 | 1.08026E-06 | DOWN   | Rho GTPase activating protein 40 [Source:HGNC Symbol;Acc:HGNC:16226]                     | chr20 | 38601934  | 38650652  | 2841  |
| DNAH11     | 0.855072123  | 2.76144E-07 | 1.17315E-06 | UP     | dynein axonemal heavy chain 11 [Source:HGNC Symbol;Acc:HGNC:2942]                        | chr7  | 21543215  | 21901839  | 14194 |
| GALNT13    | -0.627165688 | 2.76157E-07 | 1.17315E-06 | DOWN   | polypeptide N-acetylgalactosaminyltransferase 13 [Source:HGNC Symbol;Acc:HGNC:23242]     | chr2  | 153871913 | 154453849 | 5704  |
| ANKRD34B   | 0.800983969  | 2.80535E-07 | 1.19035E-06 | UP     | ankyrin repeat domain 34B [Source:HGNC Symbol;Acc:HGNC:33736]                            | chr5  | 80556755  | 80570488  | 3938  |
| TMPPRS4    | -0.911109669 | 2.95491E-07 | 1.2506E-06  | DOWN   | transmembrane protease, serine 4 [Source:HGNC Symbol;Acc:HGNC:11878]                     | chr11 | 118077012 | 118121890 | 5582  |
| LINC01605  | -0.626614202 | 3.11E-07    | 1.31164E-06 | DOWN   | long intergenic non-protein coding RNA 1605 [Source:HGNC Symbol;Acc:HGNC:51654]          | chr8  | 37421341  | 37554183  | 1522  |
| GABRB2     | -0.700789882 | 3.28984E-07 | 1.38362E-06 | DOWN   | gamma-aminobutyric acid type A receptor beta2 subunit [Source:HGNC Symbol;Acc:HGNC:4082] | chr5  | 161288429 | 161548227 | 9131  |
| CACNA1I    | -0.593350815 | 3.55779E-07 | 1.48838E-06 | DOWN   | calcium voltage-gated channel subunit alpha1 I [Source:HGNC Symbol;Acc:HGNC:1396]        | chr22 | 39570753  | 39689737  | 10717 |
| C4B        | 0.603431608  | 3.57397E-07 | 1.49446E-06 | UP     | complement C4B (Chido blood group) [Source:HGNC Symbol;Acc:HGNC:1324]                    | chr6  | 32014762  | 32035418  | 5460  |
| EHF        | -0.649871412 | 3.76596E-07 | 1.57148E-06 | DOWN   | ETS homologous factor [Source:HGNC Symbol;Acc:HGNC:3246]                                 | chr11 | 34621111  | 34661057  | 3953  |
| TRIM55     | 0.802682202  | 3.85576E-07 | 1.60562E-06 | UP     | tripartite motif containing 55 [Source:HGNC Symbol;Acc:HGNC:14215]                       | chr8  | 66126896  | 66175487  | 3002  |
| DUOX2      | -0.697659255 | 3.89342E-07 | 1.61945E-06 | DOWN   | dual oxidase 2 [Source:HGNC Symbol;Acc:HGNC:13273]                                       | chr15 | 45092650  | 45114344  | 6537  |
| AC018755.2 | 0.591865384  | 3.90158E-07 | 1.6221E-06  | UP     |                                                                                          | chr19 | 51612091  | 51646889  | 2310  |
| AC005336.1 | -0.738651354 | 3.95615E-07 | 1.64252E-06 | DOWN   |                                                                                          | chr19 | 15910582  | 15911824  | 1243  |
| ARSE       | -0.787388573 | 4.1495E-07  | 1.71769E-06 | DOWN   | arylsulfatase E (chondrodysplasia punctata 1) [Source:HGNC Symbol;Acc:HGNC:719]          | chrX  | 2934632   | 2968310   | 2668  |
| AC093668.2 | -0.649640418 | 4.40543E-07 | 1.81575E-06 | DOWN   |                                                                                          | chr7  | 102483344 | 102543764 | 3569  |
| CYP4F3     | -0.795503945 | 4.45544E-07 | 1.83553E-06 | DOWN   | cytochrome P450 family 4 subfamily F member 3 [Source:HGNC Symbol;Acc:HGNC:2646]         | chr19 | 15640897  | 15662825  | 5304  |
| FAM83C     | -0.795535338 | 4.59476E-07 | 1.88735E-06 | DOWN   | family with sequence similarity 83 member C [Source:HGNC Symbol;Acc:HGNC:16121]          | chr20 | 35285731  | 35292401  | 3145  |
| SIRPAP1    | 0.58568539   | 4.96646E-07 | 2.02763E-06 | UP     | signal regulatory protein alpha pseudogene 1 [Source:HGNC Symbol;Acc:HGNC:9663]          | chr22 | 30542536  | 30544305  | 1770  |
| AC025884.1 | 0.640192638  | 5.32774E-07 | 2.16586E-06 | UP     |                                                                                          | chr15 | 22278971  | 22282872  | 378   |
| NELL1      | -0.873791986 | 5.39066E-07 | 2.18898E-06 | DOWN   | neural EGFL like 1 [Source:HGNC Symbol;Acc:HGNC:7750]                                    | chr11 | 20669551  | 21575681  | 3349  |
| FXSD2      | 0.913959661  | 5.61233E-07 | 2.27645E-06 | UP     | FXSD domain containing ion transport regulator 2 [Source:HGNC Symbol;Acc:HGNC:4026]      | chr11 | 117801730 | 117828698 | 1069  |
| FOXO1      | 0.754101225  | 5.65397E-07 | 2.29282E-06 | UP     | forkhead box D1 [Source:HGNC Symbol;Acc:HGNC:3802]                                       | chr5  | 73446256  | 73448527  | 2272  |
| IGF2BP2    | 0.591289177  | 5.81615E-07 | 2.3549E-06  | UP     | insulin like growth factor 2 mRNA binding protein 2 [Source:HGNC Symbol;Acc:HGNC:28867]  | chr3  | 185643739 | 185825056 | 3826  |



| PARAM      | logFC        | pval        | pval.adj    | UPDOWN | desc                                                                                              | chr   | start     | end       | size  |
|------------|--------------|-------------|-------------|--------|---------------------------------------------------------------------------------------------------|-------|-----------|-----------|-------|
| SUSD4      | -0.626387253 | 5.86833E-07 | 2.37444E-06 | DOWN   | rushi domain containing 4 [Source:HGNC Symbol;Acc:HGNC:25470]                                     | chr1  | 223220819 | 223364202 | 3815  |
| RBPS       | 0.589227498  | 5.99547E-07 | 2.42372E-06 | UP     | retinol binding protein 5 [Source:HGNC Symbol;Acc:HGNC:15847]                                     | chr12 | 7123684   | 7128942   | 1226  |
| GREM1      | 0.588948437  | 6.16507E-07 | 2.4864E-06  | UP     | gremlin 1, DAN family BMP antagonist [Source:HGNC Symbol;Acc:HGNC:2001]                           | chr15 | 32717974  | 32745107  | 14606 |
| SLC16A9    | -0.619364363 | 6.2459E-07  | 2.51654E-06 | DOWN   | solute carrier family 16 member 9 [Source:HGNC Symbol;Acc:HGNC:23520]                             | chr10 | 59650761  | 59736002  | 4251  |
| WNT11      | -0.615641511 | 6.3707E-07  | 2.56284E-06 | DOWN   | Wnt family member 11 [Source:HGNC Symbol;Acc:HGNC:12776]                                          | chr11 | 76186325  | 76206532  | 1930  |
| ANKFN1     | -0.664373547 | 7.27106E-07 | 2.89995E-06 | DOWN   | ankyrin repeat and fibronectin type III domain containing 1 [Source:HGNC Symbol;Acc:HGNC:26766]   | chr17 | 56153475  | 56511659  | 3997  |
| AC243756.1 | 0.599062952  | 7.28861E-07 | 2.90631E-06 | UP     |                                                                                                   | chr1  | 146344131 | 146344790 | 660   |
| CADM3      | 0.684231603  | 7.33212E-07 | 2.92301E-06 | UP     | cell adhesion molecule 3 [Source:HGNC Symbol;Acc:HGNC:17601]                                      | chr1  | 159171609 | 159203313 | 3847  |
| SERPINB3   | 1.164521372  | 7.82302E-07 | 3.10365E-06 | UP     | serpin family B member 3 [Source:HGNC Symbol;Acc:HGNC:10569]                                      | chr18 | 63655197  | 63661963  | 1777  |
| SLC5A5     | 0.719992919  | 7.84152E-07 | 3.109E-06   | UP     | solute carrier family 5 member 5 [Source:HGNC Symbol;Acc:HGNC:11040]                              | chr19 | 17871973  | 17895174  | 3576  |
| SLITRK2    | 0.683476293  | 7.98814E-07 | 3.16436E-06 | UP     | SLIT and NTRK like family member 2 [Source:HGNC Symbol;Acc:HGNC:13449]                            | chrX  | 145818171 | 145825842 | 7672  |
| ENTPD2     | -0.623962732 | 8.0644E-07  | 3.19109E-06 | DOWN   | ectonucleoside triphosphate diphosphohydrolase 2 [Source:HGNC Symbol;Acc:HGNC:3364]               | chr9  | 137048098 | 137054045 | 2095  |
| PROC       | -0.677618473 | 8.86181E-07 | 3.48381E-06 | DOWN   | protein C, inactivator of coagulation factors Va and VIIIa [Source:HGNC Symbol;Acc:HGNC:9451]     | chr2  | 127418427 | 127429246 | 1915  |
| SYT8       | -0.71459935  | 9.13158E-07 | 3.57978E-06 | DOWN   | synaptotagmin 8 [Source:HGNC Symbol;Acc:HGNC:19264]                                               | chr11 | 1834444   | 1837521   | 1714  |
| FGF5       | 0.640784273  | 9.1659E-07  | 3.59245E-06 | UP     | fibroblast growth factor 5 [Source:HGNC Symbol;Acc:HGNC:3683]                                     | chr4  | 80266599  | 80291017  | 5378  |
| RNF39      | -0.64470551  | 9.75907E-07 | 3.81258E-06 | DOWN   | ring finger protein 39 [Source:HGNC Symbol;Acc:HGNC:18064]                                        | chr6  | 30070266  | 30075887  | 2206  |
| EN2        | 0.683491515  | 1.00178E-06 | 3.90188E-06 | UP     | engrailed homeobox 2 [Source:HGNC Symbol;Acc:HGNC:3343]                                           | chr7  | 155458129 | 155464831 | 3395  |
| ATG9B      | -0.62909837  | 1.06208E-06 | 4.11729E-06 | DOWN   | autophagy related 9B [Source:HGNC Symbol;Acc:HGNC:21899]                                          | chr7  | 151012247 | 151024499 | 5239  |
| CRISP3     | -0.803374265 | 1.0823E-06  | 4.18852E-06 | DOWN   | cysteine rich secretory protein 3 [Source:HGNC Symbol;Acc:HGNC:16904]                             | chr6  | 49727384  | 49744437  | 2247  |
| MYOZ1      | -0.585969406 | 1.21681E-06 | 4.66624E-06 | DOWN   | myozenin 1 [Source:HGNC Symbol;Acc:HGNC:13752]                                                    | chr10 | 73631654  | 73641757  | 1541  |
| ONECUT2    | -0.739778712 | 1.25799E-06 | 4.81601E-06 | DOWN   | one cut homeobox 2 [Source:HGNC Symbol;Acc:HGNC:8139]                                             | chr18 | 57435685  | 57491297  | 16121 |
| AC006329.1 | 0.672480642  | 1.2666E-06  | 4.84691E-06 | UP     |                                                                                                   | chr7  | 101308346 | 101310985 | 705   |
| DSG3       | 1.239199096  | 1.27761E-06 | 4.88492E-06 | UP     | desmoglein 3 [Source:HGNC Symbol;Acc:HGNC:3050]                                                   | chr18 | 31447795  | 31478702  | 5525  |
| AC092118.1 | -0.586735563 | 1.29341E-06 | 4.9422E-06  | DOWN   |                                                                                                   | chr16 | 57798265  | 57816946  | 2035  |
| CA4        | -0.69143658  | 1.29671E-06 | 4.95377E-06 | DOWN   | carbonic anhydrase 4 [Source:HGNC Symbol;Acc:HGNC:1375]                                           | chr17 | 60149936  | 60159540  | 1154  |
| DQX1       | -0.614020188 | 1.382E-06   | 5.25416E-06 | DOWN   | DEAQ-box RNA dependent ATPase 1 [Source:HGNC Symbol;Acc:HGNC:20410]                               | chr2  | 74518131  | 74526336  | 2689  |
| CCL24      | 0.61727057   | 1.47196E-06 | 5.57635E-06 | UP     | C-C motif chemokine ligand 24 [Source:HGNC Symbol;Acc:HGNC:10623]                                 | chr7  | 75811665  | 75823356  | 617   |
| IL1RAPL2   | -0.65945042  | 1.57508E-06 | 5.94087E-06 | DOWN   | interleukin 1 receptor accessory protein like 2 [Source:HGNC Symbol;Acc:HGNC:5997]                | chrX  | 104566315 | 105767829 | 2986  |
| TERT       | 0.590678012  | 1.5997E-06  | 6.02747E-06 | UP     | telomerase reverse transcriptase [Source:HGNC Symbol;Acc:HGNC:11730]                              | chr5  | 1253167   | 1295047   | 4032  |
| SYT9       | -0.634254866 | 1.60028E-06 | 6.02841E-06 | DOWN   | synaptotagmin 9 [Source:HGNC Symbol;Acc:HGNC:19265]                                               | chr11 | 7251950   | 7469042   | 3955  |
| SEZ6L      | -0.654375183 | 1.60999E-06 | 6.0637E-06  | DOWN   | seizure related 6 homolog like [Source:HGNC Symbol;Acc:HGNC:10763]                                | chr22 | 26169474  | 26383597  | 6728  |
| POCK3      | -0.792469707 | 1.65931E-06 | 6.23263E-06 | DOWN   | SPARC/osteonectin, cwcv and kazal like domains proteoglycan 3 [Source:HGNC Symbol;Acc:HGNC:13565] | chr4  | 166733384 | 167234796 | 3890  |
| TIMD4      | 0.625729126  | 1.78199E-06 | 6.67686E-06 | UP     | T-cell immunoglobulin and mucin domain containing 4 [Source:HGNC Symbol;Acc:HGNC:25132]           | chr5  | 156919282 | 156963255 | 1555  |
| DIRAS2     | -0.688786911 | 2.01437E-06 | 7.47799E-06 | DOWN   | DIRAS family GTPase 2 [Source:HGNC Symbol;Acc:HGNC:19323]                                         | chr9  | 90609832  | 90643105  | 4386  |
| CYP1A1     | -0.892797901 | 2.03355E-06 | 7.54304E-06 | DOWN   | cytochrome P450 family 1 subfamily A member 1 [Source:HGNC Symbol;Acc:HGNC:2595]                  | chr15 | 74719542  | 74725610  | 3083  |
| AC060834.1 | -0.592912162 | 2.07533E-06 | 7.68229E-06 | DOWN   |                                                                                                   | chr7  | 9726241   | 9728272   | 2032  |
| KRT5       | 1.148655054  | 2.4349E-06  | 8.92765E-06 | UP     | keratin 5 [Source:HGNC Symbol;Acc:HGNC:6442]                                                      | chr12 | 52514575  | 52520687  | 2531  |
| SPRR3      | -0.882852123 | 2.46021E-06 | 9.01861E-06 | DOWN   | small proline rich protein 3 [Source:HGNC Symbol;Acc:HGNC:11268]                                  | chr1  | 153001747 | 153003856 | 986   |
| SLC39A5    | -0.82191456  | 2.46786E-06 | 9.04118E-06 | DOWN   | solute carrier family 39 member 5 [Source:HGNC Symbol;Acc:HGNC:20502]                             | chr12 | 56230063  | 56237846  | 2147  |
| PPP1R14D   | -0.716033595 | 2.74038E-06 | 9.95109E-06 | DOWN   | protein phosphatase 1 regulatory inhibitor subunit 14D [Source:HGNC Symbol;Acc:HGNC:14953]        | chr15 | 40815445  | 40828709  | 873   |
| MSMB       | -0.931008894 | 3.09019E-06 | 1.1141E-05  | DOWN   | microseminoprotein beta [Source:HGNC Symbol;Acc:HGNC:7372]                                        | chr10 | 46033307  | 46046269  | 492   |
| LGALS4     | -0.842421996 | 3.29607E-06 | 1.18386E-05 | DOWN   | galectin 4 [Source:HGNC Symbol;Acc:HGNC:6565]                                                     | chr19 | 38801679  | 38813364  | 1535  |
| SERPINB13  | 0.975281605  | 3.34234E-06 | 1.1995E-05  | UP     | serpin family B member 13 [Source:HGNC Symbol;Acc:HGNC:8944]                                      | chr18 | 63587300  | 63599199  | 3207  |
| PAH        | -1.165755242 | 3.35982E-06 | 1.20508E-05 | DOWN   | phenylalanine hydroxylase [Source:HGNC Symbol;Acc:HGNC:8582]                                      | chr12 | 102836885 | 102917603 | 4254  |
| CCL21      | 0.719562777  | 3.57226E-06 | 1.27694E-05 | UP     | C-C motif chemokine ligand 21 [Source:HGNC Symbol;Acc:HGNC:10620]                                 | chr9  | 34709005  | 34710124  | 924   |
| DNAH17     | 0.679001223  | 3.59025E-06 | 1.28282E-05 | UP     | dynein axonemal heavy chain 17 [Source:HGNC Symbol;Acc:HGNC:2946]                                 | chr17 | 78423697  | 78577394  | 13723 |
| KCNJ1      | -0.619930191 | 3.65081E-06 | 1.30352E-05 | DOWN   | potassium voltage-gated channel modifier subfamily G member 1 [Source:HGNC Symbol;Acc:HGNC:6248]  | chr20 | 51003656  | 51023129  | 2211  |
| VIL1       | -1.194118403 | 3.81252E-06 | 1.35832E-05 | DOWN   | villin 1 [Source:HGNC Symbol;Acc:HGNC:12690]                                                      | chr2  | 218419092 | 218453295 | 6872  |
| FGFBP1     | 0.832437773  | 3.81892E-06 | 1.36033E-05 | UP     | fibroblast growth factor binding protein 1 [Source:HGNC Symbol;Acc:HGNC:19695]                    | chr4  | 15935569  | 15938740  | 1359  |
| MLXIP1     | -0.741084235 | 3.98559E-06 | 1.41597E-05 | DOWN   | MLX interacting protein like [Source:HGNC Symbol;Acc:HGNC:12744]                                  | chr7  | 73593194  | 73624540  | 3568  |
| NGEF       | -0.605452712 | 4.2424E-06  | 1.50262E-05 | DOWN   | neuronal guanine nucleotide exchange factor [Source:HGNC Symbol;Acc:HGNC:7807]                    | chr2  | 232878686 | 233013272 | 3631  |
| CXCL5      | 0.764841259  | 4.35374E-06 | 1.53995E-05 | UP     | C-X-C motif chemokine ligand 5 [Source:HGNC Symbol;Acc:HGNC:10642]                                | chr4  | 73995642  | 73998779  | 2538  |
| COL6A6     | 0.670394821  | 4.38264E-06 | 1.54956E-05 | UP     | collagen type VI alpha 6 chain [Source:HGNC Symbol;Acc:HGNC:27023]                                | chr3  | 130560334 | 130678155 | 9581  |
| SOX11      | -0.636871232 | 4.45819E-06 | 1.57474E-05 | DOWN   | SRY-box 11 [Source:HGNC Symbol;Acc:HGNC:11191]                                                    | chr2  | 5692667   | 5701385   | 8719  |
| CYP3A7     | -0.627610705 | 4.57436E-06 | 1.61138E-05 | DOWN   | cytochrome P450 family 3 subfamily A member 7 [Source:HGNC Symbol;Acc:HGNC:2640]                  | chr7  | 99705044  | 99735096  | 1971  |
| CALML5     | 0.835550157  | 4.9786E-06  | 1.74361E-05 | UP     | calmodulin like 5 [Source:HGNC Symbol;Acc:HGNC:18180]                                             | chr10 | 5498697   | 5499555   | 859   |
| BARX2      | 0.729854117  | 5.19042E-06 | 1.8143E-05  | UP     | BARX homeobox 2 [Source:HGNC Symbol;Acc:HGNC:956]                                                 | chr11 | 129375940 | 129452279 | 1813  |

| PARAM      | logFC        | pval        | pval.adj    | UPDOWN | desc                                                                                                            | chr   | start     | end       | size  |
|------------|--------------|-------------|-------------|--------|-----------------------------------------------------------------------------------------------------------------|-------|-----------|-----------|-------|
| ITH2       | -1.191548059 | 5.26713E-06 | 1.83969E-05 | DOWN   | inter-alpha-trypsin inhibitor heavy chain 2 [Source:HGNC Symbol;Acc:HGNC:6167]                                  | chr10 | 7703269   | 7749520   | 3193  |
| CPA4       | 0.696338025  | 5.28763E-06 | 1.84614E-05 | UP     | carboxypeptidase A4 [Source:HGNC Symbol;Acc:HGNC:15740]                                                         | chr7  | 130293134 | 130324180 | 2817  |
| SLC6A15    | 0.893960751  | 6.16519E-06 | 2.13731E-05 | UP     | solute carrier family 6 member 15 [Source:HGNC Symbol;Acc:HGNC:13621]                                           | chr12 | 84859488  | 84912876  | 7895  |
| PLPPR1     | -0.775673215 | 6.53294E-06 | 2.25574E-05 | DOWN   | phospholipid phosphatase related 1 [Source:HGNC Symbol;Acc:HGNC:25993]                                          | chr9  | 101028709 | 101325135 | 2716  |
| MYEOV      | 0.768142918  | 6.59165E-06 | 2.27471E-05 | UP     | myeloma overexpressed [Source:HGNC Symbol;Acc:HGNC:7563]                                                        | chr11 | 69294388  | 69297287  | 2494  |
| KRT81      | 0.699311063  | 6.7459E-06  | 2.32484E-05 | UP     | keratin 81 [Source:HGNC Symbol;Acc:HGNC:6458]                                                                   | chr12 | 52285913  | 52291534  | 1929  |
| SERPIND1   | -0.925618038 | 7.03054E-06 | 2.41559E-05 | DOWN   | serpin family D member 1 [Source:HGNC Symbol;Acc:HGNC:4838]                                                     | chr22 | 20773879  | 20787720  | 2553  |
| KIF1A      | -0.923690722 | 7.1052E-06  | 2.43939E-05 | DOWN   | kinesin family member 1A [Source:HGNC Symbol;Acc:HGNC:888]                                                      | chr2  | 240713764 | 240820308 | 9223  |
| CRYM       | -0.598967511 | 7.28676E-06 | 2.49794E-05 | DOWN   | crystallin mu [Source:HGNC Symbol;Acc:HGNC:2418]                                                                | chr16 | 21258518  | 21303051  | 1474  |
| ABCC8      | -0.717374237 | 7.64513E-06 | 2.6124E-05  | DOWN   | ATP binding cassette subfamily C member 8 [Source:HGNC Symbol;Acc:HGNC:59]                                      | chr11 | 17392885  | 17476845  | 4924  |
| TMEM40     | -0.607749923 | 8.15622E-06 | 2.7771E-05  | DOWN   | transmembrane protein 40 [Source:HGNC Symbol;Acc:HGNC:25620]                                                    | chr3  | 12733525  | 12769457  | 2515  |
| PRAME      | 1.093185395  | 8.46516E-06 | 2.87419E-05 | UP     | preferentially expressed antigen in melanoma [Source:HGNC Symbol;Acc:HGNC:9336]                                 | chr22 | 22547701  | 22559340  | 2996  |
| SMIM24     | -0.714586443 | 8.6656E-06  | 2.93785E-05 | DOWN   | small integral membrane protein 24 [Source:HGNC Symbol;Acc:HGNC:37244]                                          | chr19 | 3473986   | 3480542   | 1498  |
| ITH3       | -0.712479837 | 9.07003E-06 | 3.06407E-05 | DOWN   | inter-alpha-trypsin inhibitor heavy chain 3 [Source:HGNC Symbol;Acc:HGNC:6168]                                  | chr3  | 52794768  | 52809009  | 3047  |
| TF2        | -0.8433669   | 9.14981E-06 | 3.08757E-05 | DOWN   | trefoil factor 2 [Source:HGNC Symbol;Acc:HGNC:11756]                                                            | chr21 | 42346357  | 42351128  | 737   |
| PRSS21     | 0.745065857  | 9.71744E-06 | 3.26695E-05 | UP     | protease, serine 21 [Source:HGNC Symbol;Acc:HGNC:9485]                                                          | chr16 | 2817180   | 2821719   | 1148  |
| HSD3B1     | -0.710609195 | 9.83152E-06 | 3.30286E-05 | DOWN   | hydroxy-delta-5-steroid dehydrogenase, 3 beta- and steroid delta-isomerase 1 [Source:HGNC Symbol;Acc:HGNC:5217] | chr1  | 119507203 | 119515054 | 1750  |
| AMBP       | -1.221262553 | 1.03324E-05 | 3.46088E-05 | DOWN   | alpha-1-microglobulin/bikunin precursor [Source:HGNC Symbol;Acc:HGNC:453]                                       | chr9  | 114060127 | 114078472 | 1434  |
| CTSE       | -0.942533221 | 1.07532E-05 | 3.59186E-05 | DOWN   | cathepsin E [Source:HGNC Symbol;Acc:HGNC:2530]                                                                  | chr1  | 206009264 | 206023909 | 2228  |
| HOXB-AS3   | -0.589336549 | 1.10508E-05 | 3.68855E-05 | DOWN   | HOXB cluster antisense RNA 3 [Source:HGNC Symbol;Acc:HGNC:40283]                                                | chr17 | 48549630  | 48606394  | 1748  |
| GPR37      | 0.596179103  | 1.15957E-05 | 3.86049E-05 | UP     | G protein-coupled receptor 37 [Source:HGNC Symbol;Acc:HGNC:4494]                                                | chr7  | 124745997 | 124765627 | 3021  |
| APOC2      | 0.6279345    | 1.21294E-05 | 4.02338E-05 | UP     | apolipoprotein C2 [Source:HGNC Symbol;Acc:HGNC:609]                                                             | chr19 | 44945982  | 44949565  | 1316  |
| SYN2       | -0.585372879 | 1.29641E-05 | 4.28067E-05 | DOWN   | synapsin II [Source:HGNC Symbol;Acc:HGNC:11495]                                                                 | chr3  | 12004402  | 12191400  | 5030  |
| KRT6B      | 1.203887271  | 1.31105E-05 | 4.32431E-05 | UP     | keratin 6B [Source:HGNC Symbol;Acc:HGNC:6444]                                                                   | chr12 | 52446651  | 52452126  | 2282  |
| HORMAD1    | 0.666094307  | 1.33793E-05 | 4.40655E-05 | UP     | HORMA domain containing 1 [Source:HGNC Symbol;Acc:HGNC:25245]                                                   | chr1  | 150698060 | 150720885 | 1894  |
| NR12       | -0.703708229 | 1.37853E-05 | 4.53286E-05 | DOWN   | nuclear receptor subfamily 1 group I member 2 [Source:HGNC Symbol;Acc:HGNC:7968]                                | chr3  | 119780484 | 119818485 | 4560  |
| DPP10      | -0.837398163 | 1.38181E-05 | 4.542E-05   | DOWN   | dipeptidyl peptidase like 10 [Source:HGNC Symbol;Acc:HGNC:20823]                                                | chr2  | 114442299 | 115845752 | 7441  |
| TFAP2B     | -0.729815164 | 1.38209E-05 | 4.54207E-05 | DOWN   | transcription factor AP-2 beta [Source:HGNC Symbol;Acc:HGNC:11743]                                              | chr6  | 50818723  | 50847613  | 5773  |
| FUT6       | -0.828765105 | 1.43738E-05 | 4.71353E-05 | DOWN   | fucosyltransferase 6 [Source:HGNC Symbol;Acc:HGNC:4017]                                                         | chr19 | 5830610   | 5839731   | 3198  |
| USH1G      | -0.636328971 | 1.46636E-05 | 4.80247E-05 | DOWN   | USH1 protein network component sans [Source:HGNC Symbol;Acc:HGNC:16356]                                         | chr17 | 74916084  | 74923256  | 3558  |
| GABBR2     | -0.769601764 | 1.52343E-05 | 4.97324E-05 | DOWN   | gamma-aminobutyric acid type B receptor subunit 2 [Source:HGNC Symbol;Acc:HGNC:4507]                            | chr9  | 98288082  | 98709197  | 5788  |
| MISP       | -0.630289021 | 1.52868E-05 | 4.9884E-05  | DOWN   | mitotic spindle positioning [Source:HGNC Symbol;Acc:HGNC:27000]                                                 | chr19 | 751126    | 764318    | 2871  |
| SERPINI2   | 0.58590937   | 1.56082E-05 | 5.08888E-05 | UP     | serpin family I member 2 [Source:HGNC Symbol;Acc:HGNC:8945]                                                     | chr3  | 167441789 | 167479004 | 1987  |
| AZGP1      | -0.84112063  | 1.62512E-05 | 5.28049E-05 | DOWN   | alpha-2-glycoprotein 1, zinc-binding [Source:HGNC Symbol;Acc:HGNC:910]                                          | chr7  | 99966730  | 99976157  | 2175  |
| CYP2B6     | -0.961200215 | 1.70177E-05 | 5.50979E-05 | DOWN   | cytochrome P450 family 2 subfamily B member 6 [Source:HGNC Symbol;Acc:HGNC:2615]                                | chr19 | 40991299  | 41018398  | 3109  |
| SLC38A3    | -0.726899207 | 1.94921E-05 | 6.24179E-05 | DOWN   | solute carrier family 38 member 3 [Source:HGNC Symbol;Acc:HGNC:18044]                                           | chr3  | 50205246  | 50221486  | 2978  |
| TRPV6      | -0.631472959 | 1.98038E-05 | 6.3349E-05  | DOWN   | transient receptor potential cation channel subfamily V member 6 [Source:HGNC Symbol;Acc:HGNC:14006]            | chr7  | 142871203 | 142885762 | 2928  |
| GRP        | -0.649479952 | 2.02389E-05 | 6.46156E-05 | DOWN   | gastrin releasing peptide [Source:HGNC Symbol;Acc:HGNC:4605]                                                    | chr18 | 59220168  | 59230771  | 848   |
| TEX15      | 0.702496222  | 2.03161E-05 | 6.48162E-05 | UP     | testis expressed 15, meiosis and synapsis associated [Source:HGNC Symbol;Acc:HGNC:11738]                        | chr8  | 30831544  | 30888706  | 11341 |
| AC011487.2 | -0.806701383 | 2.1578E-05  | 6.85167E-05 | DOWN   |                                                                                                                 | chr19 | 53599628  | 53608451  | 2047  |
| SAA2       | 0.803673114  | 2.24646E-05 | 7.10603E-05 | UP     | serum amyloid A2 [Source:HGNC Symbol;Acc:HGNC:10514]                                                            | chr11 | 18239223  | 18248643  | 2227  |
| FRMPD2     | -0.63132855  | 2.27131E-05 | 7.17717E-05 | DOWN   | FERM and PDZ domain containing 2 [Source:HGNC Symbol;Acc:HGNC:28572]                                            | chr10 | 481555673 | 48274870  | 5376  |
| CPNE4      | -0.670080084 | 2.27416E-05 | 7.18468E-05 | DOWN   | copine 4 [Source:HGNC Symbol;Acc:HGNC:2317]                                                                     | chr3  | 131533562 | 132285410 | 5647  |
| PAX3       | 0.73730259   | 2.49596E-05 | 7.83895E-05 | UP     | paired box 3 [Source:HGNC Symbol;Acc:HGNC:8617]                                                                 | chr2  | 222199888 | 222298996 | 4394  |
| CDKN2A     | 0.668480596  | 2.59106E-05 | 8.10393E-05 | UP     | cyclin dependent kinase inhibitor 2A [Source:HGNC Symbol;Acc:HGNC:1787]                                         | chr9  | 21967753  | 21995301  | 3157  |
| AGMO       | -0.59510748  | 3.07302E-05 | 9.49989E-05 | DOWN   | alkylglycerol monooxygenase [Source:HGNC Symbol;Acc:HGNC:33784]                                                 | chr7  | 15200318  | 15562015  | 2475  |
| ZNF209P    | -0.589837106 | 3.14993E-05 | 9.72771E-05 | DOWN   | zinc finger protein 209, pseudogene [Source:HGNC Symbol;Acc:HGNC:13000]                                         | chr19 | 22463922  | 22473036  | 2304  |
| C2orf72    | -0.630740021 | 3.22939E-05 | 9.94599E-05 | DOWN   | chromosome 2 open reading frame 72 [Source:HGNC Symbol;Acc:HGNC:27418]                                          | chr2  | 231037490 | 231049714 | 3657  |
| FOXE1      | 0.884417396  | 3.29092E-05 | 0.00010218  | UP     | forkhead box E1 [Source:HGNC Symbol;Acc:HGNC:3806]                                                              | chr9  | 97853254  | 97856715  | 3462  |
| CTNND2     | -0.657757372 | 3.33299E-05 | 0.00010239  | DOWN   | catenin delta 2 [Source:HGNC Symbol;Acc:HGNC:2516]                                                              | chr5  | 10971840  | 11904043  | 5755  |
| CPB2       | -0.939512684 | 3.51289E-05 | 0.000107534 | DOWN   | carboxypeptidase B2 [Source:HGNC Symbol;Acc:HGNC:2300]                                                          | chr13 | 46053186  | 46105076  | 1767  |
| LRRC31     | -0.751916934 | 3.51421E-05 | 0.000107556 | DOWN   | leucine rich repeat containing 31 [Source:HGNC Symbol;Acc:HGNC:26261]                                           | chr3  | 169839179 | 169869930 | 2603  |
| POU6F2     | -0.670854496 | 3.89835E-05 | 0.000118453 | DOWN   | POU class 6 homeobox 2 [Source:HGNC Symbol;Acc:HGNC:21694]                                                      | chr7  | 38977998  | 39468601  | 6240  |
| DDC        | -1.02415665  | 3.90943E-05 | 0.00011873  | DOWN   | dopa decarboxylase [Source:HGNC Symbol;Acc:HGNC:2719]                                                           | chr7  | 50458436  | 50565457  | 2493  |
| CFAP47     | -0.645229333 | 3.95573E-05 | 0.000119975 | DOWN   | cilia and flagella associated protein 47 [Source:HGNC Symbol;Acc:HGNC:26708]                                    | chrX  | 35919734  | 36385319  | 10890 |
| DACT2      | -0.604331669 | 4.9027E-05  | 0.000146612 | DOWN   | dishevelled binding antagonist of beta catenin 2 [Source:HGNC Symbol;Acc:HGNC:21231]                            | chr6  | 168292830 | 168319754 | 4223  |
| ERICH3     | 0.639483143  | 5.49347E-05 | 0.000163015 | UP     | glutamate rich 3 [Source:HGNC Symbol;Acc:HGNC:25346]                                                            | chr1  | 74568111  | 74673738  | 7654  |

| PARAM      | logFC        | pval        | pval.adj    | UPDOWN | desc                                                                                          | chr   | start     | end       | size |
|------------|--------------|-------------|-------------|--------|-----------------------------------------------------------------------------------------------|-------|-----------|-----------|------|
| TM45F4     | -0.852332394 | 5.98624E-05 | 0.000176712 | DOWN   | transmembrane 4 L six family member 4 [Source:HGNC Symbol;Acc:HGNC:11856]                     | chr3  | 149473974 | 149503281 | 2101 |
| EPYC       | 0.705136539  | 6.38586E-05 | 0.000187745 | UP     | epiphycan [Source:HGNC Symbol;Acc:HGNC:3053]                                                  | chr12 | 90963679  | 91005026  | 1539 |
| ZNF750     | -0.603668546 | 6.83794E-05 | 0.000200224 | DOWN   | zinc finger protein 750 [Source:HGNC Symbol;Acc:HGNC:25843]                                   | chr17 | 82829435  | 82840578  | 3713 |
| GDA        | -0.692839934 | 7.19281E-05 | 0.00020992  | DOWN   | guanine deaminase [Source:HGNC Symbol;Acc:HGNC:4212]                                          | chr9  | 72114595  | 72253560  | 6018 |
| MS4A8      | -0.816129778 | 7.35986E-05 | 0.000214295 | DOWN   | membrane spanning 4-domains A8 [Source:HGNC Symbol;Acc:HGNC:13380]                            | chr11 | 60699574  | 60715811  | 1353 |
| SLC6A2     | -0.635116807 | 7.93932E-05 | 0.000229755 | DOWN   | solute carrier family 6 member 2 [Source:HGNC Symbol;Acc:HGNC:11048]                          | chr16 | 55655604  | 55706192  | 5364 |
| HEPHL1     | 0.766868769  | 7.96277E-05 | 0.000230554 | UP     | hephaestin like 1 [Source:HGNC Symbol;Acc:HGNC:30477]                                         | chr11 | 94021361  | 94113751  | 5345 |
| SLC30A10   | -0.636553409 | 8.26073E-05 | 0.000238607 | DOWN   | solute carrier family 30 member 10 [Source:HGNC Symbol;Acc:HGNC:25355]                        | chr1  | 219915154 | 219928602 | 1915 |
| UGT2B4     | -0.990086366 | 8.28345E-05 | 0.000239114 | DOWN   | UDP glucuronosyltransferase family 2 member B4 [Source:HGNC Symbol;Acc:HGNC:12553]            | chr4  | 69480165  | 69495908  | 2120 |
| GSTA1      | -0.84905731  | 8.77094E-05 | 0.000252502 | DOWN   | glutathione S-transferase alpha 1 [Source:HGNC Symbol;Acc:HGNC:4626]                          | chr6  | 52791664  | 52803910  | 1019 |
| ZNF556     | -0.591028067 | 8.9781E-05  | 0.000257893 | DOWN   | zinc finger protein 556 [Source:HGNC Symbol;Acc:HGNC:25669]                                   | chr19 | 2867335   | 2883445   | 6574 |
| HPX        | -0.649801758 | 9.05979E-05 | 0.000260116 | DOWN   | hemopexin [Source:HGNC Symbol;Acc:HGNC:5171]                                                  | chr11 | 6431049   | 6441064   | 1652 |
| SLC6A11    | -0.648441598 | 9.16725E-05 | 0.00026291  | DOWN   | solute carrier family 6 member 11 [Source:HGNC Symbol;Acc:HGNC:11044]                         | chr3  | 10816200  | 10940733  | 6402 |
| TBL1Y      | -0.765552908 | 9.79025E-05 | 0.000279407 | DOWN   | transducin beta like 1, Y-linked [Source:HGNC Symbol;Acc:HGNC:18502]                          | chrY  | 6910686   | 7091683   | 2407 |
| GJB4       | -0.595878917 | 0.000100116 | 0.000285186 | DOWN   | gap junction protein beta 4 [Source:HGNC Symbol;Acc:HGNC:4286]                                | chr1  | 34759741  | 34763724  | 2840 |
| CAPN13     | -0.607672316 | 0.000101332 | 0.000288241 | DOWN   | calpain 13 [Source:HGNC Symbol;Acc:HGNC:16663]                                                | chr2  | 30722771  | 30807446  | 2683 |
| CFHR3      | -0.66602106  | 0.000105319 | 0.000298599 | DOWN   | complement factor H related 3 [Source:HGNC Symbol;Acc:HGNC:16980]                             | chr1  | 196774795 | 196795406 | 3752 |
| BCORP1     | 0.598485929  | 0.000106449 | 0.000301377 | UP     | BCL6 corepressor pseudogene 1 [Source:HGNC Symbol;Acc:HGNC:23953]                             | chrY  | 19455431  | 19503153  | 6862 |
| PADI1      | -0.638403867 | 0.000116801 | 0.000327819 | DOWN   | peptidyl arginine deiminase 1 [Source:HGNC Symbol;Acc:HGNC:18367]                             | chr1  | 17205126  | 17246005  | 3846 |
| TNNT1      | 0.715192443  | 0.000120626 | 0.000337913 | UP     | troponin T1, slow skeletal type [Source:HGNC Symbol;Acc:HGNC:11948]                           | chr19 | 55132794  | 55149354  | 1519 |
| HNF4A      | -0.92513962  | 0.000121186 | 0.000339338 | DOWN   | hepatocyte nuclear factor 4 alpha [Source:HGNC Symbol;Acc:HGNC:5024]                          | chr20 | 44355700  | 44434596  | 7206 |
| ADGRF1     | -0.596065976 | 0.000127225 | 0.000354881 | DOWN   | adhesion G protein-coupled receptor F1 [Source:HGNC Symbol;Acc:HGNC:18990]                    | chr6  | 46997703  | 47042363  | 6100 |
| ST6GALNAC1 | -0.61402343  | 0.000138562 | 0.000383964 | DOWN   | ST6 N-acetylgalactosaminide alpha-2,6-sialyltransferase 1 [Source:HGNC Symbol;Acc:HGNC:23614] | chr17 | 76624763  | 76643838  | 2836 |
| TUBB4A     | 0.590817374  | 0.000143395 | 0.000396204 | UP     | tubulin beta 4A class IVa [Source:HGNC Symbol;Acc:HGNC:20774]                                 | chr19 | 6494319   | 6502584   | 2646 |
| KLK4       | -0.589415707 | 0.000144191 | 0.000398222 | DOWN   | kallikrein related peptidase 4 [Source:HGNC Symbol;Acc:HGNC:6365]                             | chr19 | 50906352  | 50910738  | 1347 |
| KRT14      | 0.872433274  | 0.000152289 | 0.000418801 | UP     | keratin 14 [Source:HGNC Symbol;Acc:HGNC:6416]                                                 | chr17 | 41582279  | 41586921  | 1662 |
| PKC1       | -0.883515807 | 0.000155105 | 0.000426027 | DOWN   | phosphoenolpyruvate carboxykinase 1 [Source:HGNC Symbol;Acc:HGNC:8724]                        | chr20 | 57561200  | 57568112  | 4341 |
| RBP4       | -0.767809002 | 0.000168456 | 0.00045998  | DOWN   | retinol binding protein 4 [Source:HGNC Symbol;Acc:HGNC:9922]                                  | chr10 | 93591687  | 93601744  | 1449 |
| MAGEC1     | 0.726011511  | 0.000173344 | 0.000472615 | UP     | MAGE family member C1 [Source:HGNC Symbol;Acc:HGNC:6812]                                      | chrX  | 141903894 | 141909388 | 4270 |
| REG4       | -0.682161928 | 0.000184895 | 0.000501321 | DOWN   | regenerating family member 4 [Source:HGNC Symbol;Acc:HGNC:22977]                              | chr1  | 119794018 | 119811660 | 3493 |
| HTR3A      | 0.668708613  | 0.000204319 | 0.000549794 | UP     | 5-hydroxytryptamine receptor 3A [Source:HGNC Symbol;Acc:HGNC:5297]                            | chr11 | 113974881 | 113990313 | 2605 |
| DSC3       | 0.779217314  | 0.000206749 | 0.000555508 | UP     | desmocollin 3 [Source:HGNC Symbol;Acc:HGNC:3037]                                              | chr18 | 30990008  | 31042815  | 7056 |
| PGLYRP4    | 0.59105003   | 0.000224019 | 0.000597922 | UP     | peptidoglycan recognition protein 4 [Source:HGNC Symbol;Acc:HGNC:30015]                       | chr1  | 153330120 | 153348840 | 2128 |
| PIWIL1     | -0.5886915   | 0.000241277 | 0.000639466 | DOWN   | piwi like RNA-mediated gene silencing 1 [Source:HGNC Symbol;Acc:HGNC:9007]                    | chr12 | 130337887 | 130372637 | 3897 |
| SULT1E1    | -0.625749589 | 0.000249812 | 0.000658718 | DOWN   | sulfotransferase family 1E member 1 [Source:HGNC Symbol;Acc:HGNC:11377]                       | chr4  | 69841212  | 69860152  | 1780 |
| STXBP5L    | -0.586862593 | 0.000261531 | 0.000686711 | DOWN   | syntaxin binding protein 5 like [Source:HGNC Symbol;Acc:HGNC:30757]                           | chr3  | 120908072 | 121424761 | 9654 |
| CNTNAP4    | 0.587298066  | 0.000261565 | 0.000686711 | UP     | contactin associated protein like 4 [Source:HGNC Symbol;Acc:HGNC:18747]                       | chr16 | 76277278  | 76559238  | 5114 |
| CDHR5      | -0.722898207 | 0.000275189 | 0.000719978 | DOWN   | cadherin related family member 5 [Source:HGNC Symbol;Acc:HGNC:7521]                           | chr11 | 616565    | 626078    | 3649 |
| ADH4       | -0.836174464 | 0.00027615  | 0.000722285 | DOWN   | alcohol dehydrogenase 4 (class II), pi polypeptide [Source:HGNC Symbol;Acc:HGNC:252]          | chr4  | 99123657  | 99144297  | 2151 |
| COL2A1     | -0.636342635 | 0.000297549 | 0.000774456 | DOWN   | collagen type II alpha 1 chain [Source:HGNC Symbol;Acc:HGNC:2200]                             | chr12 | 47972965  | 48004486  | 5071 |
| KRT23      | -0.62281302  | 0.000302496 | 0.000786317 | DOWN   | keratin 23 [Source:HGNC Symbol;Acc:HGNC:6438]                                                 | chr17 | 40922696  | 40937450  | 2235 |
| ADH6       | -0.664613927 | 0.000322475 | 0.000833707 | DOWN   | alcohol dehydrogenase 6 (class V) [Source:HGNC Symbol;Acc:HGNC:255]                           | chr4  | 99202638  | 99219537  | 3775 |
| ZIC5       | 0.623160128  | 0.000322902 | 0.000834575 | UP     | Zic family member 5 [Source:HGNC Symbol;Acc:HGNC:20322]                                       | chr13 | 99962964  | 99971909  | 4639 |
| CFHR1      | -0.858697847 | 0.000333837 | 0.00086026  | DOWN   | complement factor H related 1 [Source:HGNC Symbol;Acc:HGNC:4888]                              | chr1  | 196819757 | 196832189 | 1271 |
| CDX2       | -0.608821747 | 0.000374129 | 0.000954591 | DOWN   | caudal type homeobox 2 [Source:HGNC Symbol;Acc:HGNC:1806]                                     | chr13 | 27962137  | 27971139  | 4053 |
| GSTM1      | -0.980282476 | 0.000390267 | 0.000991998 | DOWN   | glutathione S-transferase mu 1 [Source:HGNC Symbol;Acc:HGNC:4632]                             | chr1  | 109687820 | 109708685 | 1423 |
| F2         | -0.762932049 | 0.000424489 | 0.001070731 | DOWN   | coagulation factor II, thrombin [Source:HGNC Symbol;Acc:HGNC:3535]                            | chr11 | 46719180  | 46739506  | 2023 |
| SPRR1A     | -0.664462212 | 0.000440689 | 0.00110851  | DOWN   | small proline rich protein 1A [Source:HGNC Symbol;Acc:HGNC:11259]                             | chr1  | 152985231 | 152985500 | 270  |
| KRT16      | 0.736254032  | 0.000456014 | 0.001143883 | UP     | keratin 16 [Source:HGNC Symbol;Acc:HGNC:6423]                                                 | chr17 | 41609778  | 41612753  | 1644 |
| FOXA2      | -0.876712778 | 0.000519203 | 0.001289721 | DOWN   | forkhead box A2 [Source:HGNC Symbol;Acc:HGNC:5022]                                            | chr20 | 22581005  | 22585455  | 2603 |
| TNS4       | -0.587450269 | 0.000537576 | 0.00133153  | DOWN   | tensin 4 [Source:HGNC Symbol;Acc:HGNC:24352]                                                  | chr17 | 40475828  | 40501597  | 4067 |
| SERPINC1   | -0.763092665 | 0.000545355 | 0.001348631 | DOWN   | serpin family C member 1 [Source:HGNC Symbol;Acc:HGNC:775]                                    | chr1  | 173903804 | 173917378 | 1599 |
| IGF2BP1    | 0.693120689  | 0.000612049 | 0.001501836 | UP     | insulin like growth factor 2 mRNA binding protein 1 [Source:HGNC Symbol;Acc:HGNC:28866]       | chr17 | 48997412  | 49055650  | 8274 |
| A1CF       | -0.748527317 | 0.000723318 | 0.001750699 | DOWN   | APOBEC1 complementation factor [Source:HGNC Symbol;Acc:HGNC:24086]                            | chr10 | 50799409  | 50885675  | 9529 |
| CASP14     | 0.683490884  | 0.000731205 | 0.001767996 | UP     | caspase 14 [Source:HGNC Symbol;Acc:HGNC:1502]                                                 | chr19 | 15049384  | 15058293  | 3241 |
| WT1-AS     | 0.586347026  | 0.000748546 | 0.001805492 | UP     | WT1 antisense RNA [Source:HGNC Symbol;Acc:HGNC:18135]                                         | chr11 | 32435518  | 32458769  | 5225 |
| ARG1       | -0.671646391 | 0.000841626 | 0.002009419 | DOWN   | arginase 1 [Source:HGNC Symbol;Acc:HGNC:663]                                                  | chr6  | 131573144 | 131584332 | 1556 |

| PARAM    | logFC        | pval        | pval.adj    | UPDOWN | desc                                                                                                | chr   | start     | end       | size  |
|----------|--------------|-------------|-------------|--------|-----------------------------------------------------------------------------------------------------|-------|-----------|-----------|-------|
| PRSS1    | -0.661858717 | 0.000842626 | 0.002010969 | DOWN   | protease, serine 1 [Source:HGNC Symbol;Acc:HGNC:9475]                                               | chr7  | 142749468 | 142753076 | 859   |
| MUC4     | 0.700034369  | 0.000862008 | 0.002051058 | UP     | mucin 4, cell surface associated [Source:HGNC Symbol;Acc:HGNC:7514]                                 | chr3  | 195746765 | 195812277 | 17110 |
| MUC12    | -0.857711642 | 0.000952805 | 0.002247632 | DOWN   | mucin 12, cell surface associated [Source:HGNC Symbol;Acc:HGNC:7510]                                | chr7  | 100969623 | 101018949 | 16750 |
| SLC1A6   | -0.621361909 | 0.000964228 | 0.002271572 | DOWN   | solute carrier family 1 member 6 [Source:HGNC Symbol;Acc:HGNC:10944]                                | chr19 | 14950034  | 15010620  | 4650  |
| SERPINA4 | -0.660903802 | 0.000974209 | 0.002292457 | DOWN   | serpin family A member 4 [Source:HGNC Symbol;Acc:HGNC:8948]                                         | chr14 | 94561091  | 94569913  | 2338  |
| CSAG1    | 0.681805391  | 0.000982205 | 0.002307679 | UP     | chondrosarcoma associated gene 1 [Source:HGNC Symbol;Acc:HGNC:24294]                                | chrX  | 152727484 | 152733735 | 1085  |
| HNF1A    | -0.691966279 | 0.001072671 | 0.002498856 | DOWN   | HNF1 homeobox A [Source:HGNC Symbol;Acc:HGNC:11621]                                                 | chr12 | 120978543 | 121002512 | 4170  |
| ANKS4B   | -0.586071863 | 0.001161247 | 0.002688542 | DOWN   | ankyrin repeat and sterile alpha motif domain containing 4B [Source:HGNC Symbol;Acc:HGNC:26795]     | chr16 | 21233665  | 21253845  | 4352  |
| PRSS3    | -0.622018237 | 0.001181686 | 0.002731755 | DOWN   | protease, serine 3 [Source:HGNC Symbol;Acc:HGNC:9486]                                               | chr9  | 33750466  | 33799231  | 1256  |
| AGR3     | -0.695011117 | 0.001367029 | 0.003125155 | DOWN   | anterior gradient 3, protein disulphide isomerase family member [Source:HGNC Symbol;Acc:HGNC:24167] | chr7  | 16859405  | 16881987  | 796   |
| TAT      | -0.734810079 | 0.0013795   | 0.003150487 | DOWN   | tyrosine aminotransferase [Source:HGNC Symbol;Acc:HGNC:11573]                                       | chr16 | 71565660  | 71577130  | 3983  |
| SLC13A5  | -0.599834442 | 0.001392264 | 0.003178437 | DOWN   | solute carrier family 13 member 5 [Source:HGNC Symbol;Acc:HGNC:23089]                               | chr17 | 6684713   | 6713567   | 3435  |
| VTN      | -0.597506607 | 0.001433784 | 0.003266002 | DOWN   | vitronectin [Source:HGNC Symbol;Acc:HGNC:12724]                                                     | chr17 | 28367276  | 28370822  | 2149  |
| PRSS2    | -0.669012278 | 0.001450668 | 0.003301376 | DOWN   | protease, serine 2 [Source:HGNC Symbol;Acc:HGNC:9483]                                               | chr7  | 142760398 | 142774564 | 915   |
| UGT2A3   | -0.606264908 | 0.002687957 | 0.005764086 | DOWN   | UDP glucuronosyltransferase family 2 member A3 [Source:HGNC Symbol;Acc:HGNC:28528]                  | chr4  | 68928463  | 68951791  | 2965  |
| MAGEA4   | 0.632776328  | 0.002903241 | 0.006168112 | UP     | MAGE family member A4 [Source:HGNC Symbol;Acc:HGNC:6802]                                            | chrX  | 151912889 | 151925170 | 2276  |
| CLRN3    | -0.588215672 | 0.003232758 | 0.006796514 | DOWN   | clarin 3 [Source:HGNC Symbol;Acc:HGNC:20795]                                                        | chr10 | 127877841 | 127892947 | 1152  |
| SLCO1B3  | 0.589176103  | 0.004056504 | 0.008352088 | UP     | solute carrier organic anion transporter family member 1B3 [Source:HGNC Symbol;Acc:HGNC:10961]      | chr12 | 20810726  | 20916911  | 2994  |
| GC       | -0.836885468 | 0.004173107 | 0.008568811 | DOWN   | GC, vitamin D binding protein [Source:HGNC Symbol;Acc:HGNC:4187]                                    | chr4  | 71741693  | 71804041  | 2088  |
| PON1     | -0.611827473 | 0.004327204 | 0.008856138 | DOWN   | paraoxonase 1 [Source:HGNC Symbol;Acc:HGNC:9204]                                                    | chr7  | 95297676  | 95324707  | 2568  |
| KRT13    | -0.596417547 | 0.004783958 | 0.009712009 | DOWN   | keratin 13 [Source:HGNC Symbol;Acc:HGNC:6415]                                                       | chr17 | 41500981  | 41505613  | 1864  |
| MUC17    | -0.642250758 | 0.004801273 | 0.009741705 | DOWN   | mucin 17, cell surface associated [Source:HGNC Symbol;Acc:HGNC:16800]                               | chr7  | 101020072 | 101058745 | 14247 |
| HABP2    | -0.65298624  | 0.004946819 | 0.010005664 | DOWN   | hyaluronan binding protein 2 [Source:HGNC Symbol;Acc:HGNC:4798]                                     | chr10 | 113550837 | 113589602 | 3137  |
| ALB      | -0.772190896 | 0.005071751 | 0.01023666  | DOWN   | albumin [Source:HGNC Symbol;Acc:HGNC:399]                                                           | chr4  | 73404239  | 73421412  | 2267  |
| SERPINA6 | -0.611662105 | 0.005404312 | 0.010840311 | DOWN   | serpin family A member 6 [Source:HGNC Symbol;Acc:HGNC:1540]                                         | chr14 | 94304249  | 94323394  | 1534  |
| CEACAM5  | -0.732291075 | 0.005932154 | 0.011819328 | DOWN   | carcinoembryonic antigen related cell adhesion molecule 5 [Source:HGNC Symbol;Acc:HGNC:1817]        | chr19 | 41708585  | 41729798  | 2907  |
| SLC5A1   | -0.619699574 | 0.006404126 | 0.012658149 | DOWN   | solute carrier family 5 member 1 [Source:HGNC Symbol;Acc:HGNC:11036]                                | chr22 | 32043032  | 32113029  | 5236  |
| CYP3A4   | -0.708816057 | 0.007148682 | 0.013986484 | DOWN   | cytochrome P450 family 3 subfamily A member 4 [Source:HGNC Symbol;Acc:HGNC:2637]                    | chr7  | 99756960  | 99784265  | 2869  |
| APOH     | -0.724224518 | 0.007239279 | 0.014145423 | DOWN   | apolipoprotein H [Source:HGNC Symbol;Acc:HGNC:616]                                                  | chr17 | 66212033  | 66229417  | 1176  |
| C8B      | -0.672274555 | 0.010487049 | 0.019771309 | DOWN   | complement C8 beta chain [Source:HGNC Symbol;Acc:HGNC:1353]                                         | chr1  | 56929210  | 56966140  | 2513  |
| USH1C    | -0.615962144 | 0.011093253 | 0.020797411 | DOWN   | USH1 protein network component harmonin [Source:HGNC Symbol;Acc:HGNC:12597]                         | chr11 | 17493895  | 17544416  | 3508  |
| ALDOB    | -0.800873323 | 0.012537964 | 0.023208354 | DOWN   | aldolase, fructose-bisphosphate B [Source:HGNC Symbol;Acc:HGNC:417]                                 | chr9  | 101420578 | 101435823 | 2451  |
| KNG1     | -0.7266468   | 0.015726423 | 0.028439634 | DOWN   | kininogen 1 [Source:HGNC Symbol;Acc:HGNC:6383]                                                      | chr3  | 186717276 | 186743954 | 3740  |
| FGA      | -0.860020292 | 0.015833131 | 0.028601225 | DOWN   | fibrinogen alpha chain [Source:HGNC Symbol;Acc:HGNC:3661]                                           | chr4  | 154583126 | 154590766 | 3956  |
| FGL1     | -0.623695766 | 0.017304318 | 0.030919935 | DOWN   | fibrinogen like 1 [Source:HGNC Symbol;Acc:HGNC:3695]                                                | chr8  | 17864380  | 17910365  | 2505  |

Table S3 List of differentially expressed genes.

Tab 2: INFLAMED\_EXCLUDED

| PARAM   | logFC       | pval        | pval.adj    | UPDOWN | desc                                                                                                                    | chr   | start     | end       | size  |
|---------|-------------|-------------|-------------|--------|-------------------------------------------------------------------------------------------------------------------------|-------|-----------|-----------|-------|
| ITGAE   | 0.890530058 | 1.88631E-90 | 3.42007E-86 | UP     | integrin subunit alpha E [Source:HGNC Symbol;Acc:HGNC:6147]                                                             | chr17 | 3714628   | 3801243   | 3858  |
| IFNG    | 1.915102583 | 6.13667E-86 | 5.5632E-82  | UP     | interferon gamma [Source:HGNC Symbol;Acc:HGNC:5438]                                                                     | chr12 | 68154768  | 68159747  | 1218  |
| PSMB9   | 1.107393606 | 6.18202E-83 | 3.73621E-79 | UP     | proteasome subunit beta 9 [Source:HGNC Symbol;Acc:HGNC:9546]                                                            | chr6  | 32844136  | 32859585  | 921   |
| TAP1    | 1.051824144 | 1.67048E-77 | 7.57188E-74 | UP     | transporter 1, ATP binding cassette subfamily B member [Source:HGNC Symbol;Acc:HGNC:43]                                 | chr6  | 32845209  | 32853978  | 2959  |
| WARS    | 0.912890004 | 3.92354E-75 | 1.42275E-71 | UP     | tryptophanyl-tRNA synthetase [Source:HGNC Symbol;Acc:HGNC:12729]                                                        | chr14 | 100333788 | 100376805 | 4245  |
| STAT1   | 0.828197651 | 1.22702E-74 | 3.70786E-71 | UP     | signal transducer and activator of transcription 1 [Source:HGNC Symbol;Acc:HGNC:11362]                                  | chr2  | 190969034 | 191014250 | 4945  |
| IRF1    | 0.810450877 | 2.05346E-72 | 5.31877E-69 | UP     | interferon regulatory factor 1 [Source:HGNC Symbol;Acc:HGNC:6116]                                                       | chr5  | 132481609 | 132490798 | 3792  |
| CXCL10  | 1.668035627 | 5.03061E-69 | 1.14012E-65 | UP     | C-X-C motif chemokine ligand 10 [Source:HGNC Symbol;Acc:HGNC:10637]                                                     | chr4  | 76021117  | 76023497  | 1176  |
| LAG3    | 1.19128277  | 2.88876E-68 | 5.81958E-65 | UP     | lymphocyte activating 3 [Source:HGNC Symbol;Acc:HGNC:6476]                                                              | chr12 | 6772519   | 6778453   | 2160  |
| GBP5    | 1.336459323 | 4.96838E-68 | 9.00818E-65 | UP     | guanylate binding protein 5 [Source:HGNC Symbol;Acc:HGNC:19895]                                                         | chr1  | 89260582  | 89270863  | 2011  |
| GBP4    | 1.041102047 | 2.75839E-67 | 4.54659E-64 | UP     | guanylate binding protein 4 [Source:HGNC Symbol;Acc:HGNC:20480]                                                         | chr1  | 89181148  | 89198932  | 6127  |
| IDO1    | 1.69561202  | 3.61087E-66 | 5.45572E-63 | UP     | indoleamine 2,3-dioxygenase 1 [Source:HGNC Symbol;Acc:HGNC:6059]                                                        | chr8  | 39902375  | 39928431  | 2319  |
| GBP1    | 0.993037709 | 2.20723E-63 | 3.0784E-60  | UP     | guanylate binding protein 1 [Source:HGNC Symbol;Acc:HGNC:4182]                                                          | chr1  | 89052319  | 89065360  | 3035  |
| KIR2DL4 | 1.706365029 | 5.79858E-63 | 7.50957E-60 | UP     | killer cell immunoglobulin like receptor, two Ig domains and long cytoplasmic tail 4 [Source:HGNC Symbol;Acc:HGNC:6332] | chr19 | 54803535  | 54814517  | 1657  |
| UBE2L6  | 0.83350588  | 3.51879E-62 | 4.25328E-59 | UP     | ubiquitin conjugating enzyme E2 L6 [Source:HGNC Symbol;Acc:HGNC:12490]                                                  | chr11 | 57551656  | 57568284  | 1796  |
| CXCL11  | 1.77623845  | 1.72268E-61 | 1.95212E-58 | UP     | C-X-C motif chemokine ligand 11 [Source:HGNC Symbol;Acc:HGNC:10638]                                                     | chr4  | 76033682  | 76041415  | 1908  |
| CXCL9   | 1.682185587 | 8.61464E-60 | 9.18777E-57 | UP     | C-X-C motif chemokine ligand 9 [Source:HGNC Symbol;Acc:HGNC:7098]                                                       | chr4  | 76001275  | 76007488  | 2740  |
| FASLG   | 1.29014085  | 1.24896E-59 | 1.25805E-56 | UP     | Fas ligand [Source:HGNC Symbol;Acc:HGNC:11936]                                                                          | chr1  | 172659018 | 172666874 | 1888  |
| LAP3    | 0.586596974 | 2.52873E-59 | 2.41308E-56 | UP     | leucine aminopeptidase 3 [Source:HGNC Symbol;Acc:HGNC:18449]                                                            | chr4  | 17577192  | 17607968  | 2213  |
| GZMA    | 1.124157446 | 1.76153E-53 | 1.59691E-50 | UP     | granzyme A [Source:HGNC Symbol;Acc:HGNC:4708]                                                                           | chr5  | 55102648  | 55110252  | 894   |
| CCL5    | 1.058511511 | 2.47435E-52 | 2.13631E-49 | UP     | C-C motif chemokine ligand 5 [Source:HGNC Symbol;Acc:HGNC:10632]                                                        | chr17 | 35871491  | 35880793  | 1430  |
| GNLY    | 1.28636429  | 1.46392E-51 | 1.20647E-48 | UP     | granulysin [Source:HGNC Symbol;Acc:HGNC:4414]                                                                           | chr2  | 85694291  | 85698854  | 1090  |
| CCL4    | 1.055914926 | 2.75863E-51 | 2.17464E-48 | UP     | C-C motif chemokine ligand 4 [Source:HGNC Symbol;Acc:HGNC:10630]                                                        | chr17 | 36103590  | 36105621  | 904   |
| CD8A    | 1.020450728 | 1.04146E-50 | 7.86779E-48 | UP     | CD8a molecule [Source:HGNC Symbol;Acc:HGNC:1706]                                                                        | chr2  | 86784610  | 86808396  | 3634  |
| CD274   | 1.091911029 | 1.47931E-50 | 1.07286E-47 | UP     | CD274 molecule [Source:HGNC Symbol;Acc:HGNC:17635]                                                                      | chr9  | 5450503   | 5470566   | 3685  |
| FAM26F  | 1.15462262  | 3.03128E-50 | 2.11385E-47 | UP     | family with sequence similarity 26 member F [Source:HGNC Symbol;Acc:HGNC:33391]                                         | chr6  | 116461370 | 116463779 | 1140  |
| PRF1    | 1.038376503 | 6.96738E-50 | 4.67873E-47 | UP     | perforin 1 [Source:HGNC Symbol;Acc:HGNC:9360]                                                                           | chr10 | 70597348  | 70602775  | 2534  |
| PSMB8   | 0.724470277 | 9.40527E-50 | 6.09025E-47 | UP     | proteasome subunit beta 8 [Source:HGNC Symbol;Acc:HGNC:9545]                                                            | chr6  | 32840717  | 32844703  | 1549  |
| CXCR2P1 | 1.627090888 | 1.34128E-49 | 8.38578E-47 | UP     | C-X-C motif chemokine receptor 2 pseudogene 1 [Source:HGNC Symbol;Acc:HGNC:6028]                                        | chr2  | 218059155 | 218065729 | 2503  |
| GZMB    | 1.281923397 | 1.6305E-49  | 9.53635E-47 | UP     | granzyme B [Source:HGNC Symbol;Acc:HGNC:4709]                                                                           | chr14 | 24630954  | 24634267  | 1304  |
| ZNF683  | 1.405618549 | 2.79623E-49 | 1.58433E-46 | UP     | zinc finger protein 683 [Source:HGNC Symbol;Acc:HGNC:28495]                                                             | chr1  | 26361634  | 26372775  | 1713  |
| NKG7    | 1.168705651 | 4.52234E-49 | 2.48468E-46 | UP     | natural killer cell granule protein 7 [Source:HGNC Symbol;Acc:HGNC:7830]                                                | chr19 | 51371606  | 51372715  | 935   |
| IFIH1   | 0.710674712 | 1.7792E-48  | 9.48787E-46 | UP     | interferon induced with helicase C domain 1 [Source:HGNC Symbol;Acc:HGNC:18873]                                         | chr2  | 162267079 | 162318703 | 4213  |
| SAMD9L  | 0.834461234 | 5.81721E-47 | 3.01348E-44 | UP     | sterile alpha motif domain containing 9 like [Source:HGNC Symbol;Acc:HGNC:1349]                                         | chr7  | 93130055  | 93148368  | 7134  |
| TAP2    | 0.762208715 | 1.39338E-46 | 7.01762E-44 | UP     | transporter 2, ATP binding cassette subfamily B member [Source:HGNC Symbol;Acc:HGNC:44]                                 | chr6  | 32821833  | 32838780  | 6175  |
| BATF2   | 1.173655356 | 4.01825E-45 | 1.86807E-42 | UP     | basic leucine zipper ATF-like transcription factor 2 [Source:HGNC Symbol;Acc:HGNC:25163]                                | chr11 | 64987943  | 64997045  | 2343  |
| CXCR6   | 0.923327285 | 6.59955E-45 | 2.99141E-42 | UP     | C-X-C motif chemokine receptor 6 [Source:HGNC Symbol;Acc:HGNC:16647]                                                    | chr3  | 45940933  | 45948353  | 3769  |
| GZMH    | 1.186935525 | 1.17072E-44 | 5.17715E-42 | UP     | granzyme H [Source:HGNC Symbol;Acc:HGNC:4710]                                                                           | chr14 | 24606480  | 24609699  | 951   |
| HLA-B   | 0.736571297 | 2.35644E-44 | 9.93597E-42 | UP     | major histocompatibility complex, class I, B [Source:HGNC Symbol;Acc:HGNC:4932]                                         | chr6  | 31269491  | 31357187  | 1586  |
| KLRD1   | 0.970990359 | 1.29242E-42 | 5.20729E-40 | UP     | killer cell lectin like receptor D1 [Source:HGNC Symbol;Acc:HGNC:6378]                                                  | chr12 | 10304446  | 10329600  | 15713 |
| UBD     | 1.459376138 | 1.12923E-41 | 4.26544E-39 | UP     | ubiquitin D [Source:HGNC Symbol;Acc:HGNC:18795]                                                                         | chr6  | 29555515  | 29559925  | 1087  |
| TYMP    | 0.841853    | 1.70613E-41 | 6.31301E-39 | UP     | thymidine phosphorylase [Source:HGNC Symbol;Acc:HGNC:3148]                                                              | chr22 | 50525752  | 50530056  | 1680  |
| CASP1   | 0.662748405 | 5.15627E-41 | 1.84542E-38 | UP     | caspase 1 [Source:HGNC Symbol;Acc:HGNC:1499]                                                                            | chr11 | 105025508 | 105035250 | 2668  |
| IL2RB   | 0.807953661 | 5.30614E-41 | 1.85011E-38 | UP     | interleukin 2 receptor subunit beta [Source:HGNC Symbol;Acc:HGNC:6009]                                                  | chr22 | 37125838  | 37149990  | 4113  |
| IL15RA  | 0.726799415 | 1.32804E-40 | 4.54316E-38 | UP     | interleukin 15 receptor subunit alpha [Source:HGNC Symbol;Acc:HGNC:5978]                                                | chr10 | 5943639   | 5978187   | 2909  |
| C1QB    | 0.878393673 | 1.64651E-40 | 5.5283E-38  | UP     | complement C1q B chain [Source:HGNC Symbol;Acc:HGNC:1242]                                                               | chr1  | 22652981  | 22661538  | 1254  |
| GBP1P1  | 1.020735801 | 1.3486E-39  | 4.44571E-37 | UP     | guanylate binding protein 1 pseudogene 1 [Source:HGNC Symbol;Acc:HGNC:39561]                                            | chr1  | 89407679  | 89426243  | 2352  |
| ETV7    | 0.802758959 | 2.53259E-39 | 8.19972E-37 | UP     | ETS variant 7 [Source:HGNC Symbol;Acc:HGNC:18160]                                                                       | chr6  | 36354091  | 36387800  | 2374  |
| HLA-F   | 0.764701125 | 4.72865E-39 | 1.47819E-36 | UP     | major histocompatibility complex, class I, F [Source:HGNC Symbol;Acc:HGNC:4963]                                         | chr6  | 29722775  | 29727296  | 1985  |
| MYO7A   | 0.773937968 | 8.65293E-39 | 2.65909E-36 | UP     | myosin VIIA [Source:HGNC Symbol;Acc:HGNC:7606]                                                                          | chr11 | 77128264  | 77215238  | 7832  |
| IFIT3   | 0.807843882 | 1.33461E-38 | 4.03297E-36 | UP     | interferon induced protein with tetratricopeptide repeats 3 [Source:HGNC Symbol;Acc:HGNC:5411]                          | chr10 | 89327894  | 89340971  | 2640  |
| HLA-A   | 0.663691275 | 4.67239E-38 | 1.38877E-35 | UP     | major histocompatibility complex, class I, A [Source:HGNC Symbol;Acc:HGNC:4931]                                         | chr6  | 29941260  | 29945884  | 2045  |
| IL12RB2 | 1.112798495 | 1.31736E-37 | 3.85242E-35 | UP     | interleukin 12 receptor subunit beta 2 [Source:HGNC Symbol;Acc:HGNC:5972]                                               | chr1  | 67307364  | 67396900  | 4128  |



| PARAM      | logFC        | pval        | pval.adj    | UPDOWN | desc                                                                                            | chr   | start     | end       | size |
|------------|--------------|-------------|-------------|--------|-------------------------------------------------------------------------------------------------|-------|-----------|-----------|------|
| IL15       | 0.751193582  | 2.22648E-37 | 6.40767E-35 | UP     | interleukin 15 [Source:HGNC Symbol;Acc:HGNC:5977]                                               | chr4  | 141636599 | 141733987 | 7517 |
| C1QA       | 0.816627347  | 5.32818E-37 | 1.50946E-34 | UP     | complement C1q A chain [Source:HGNC Symbol;Acc:HGNC:1241]                                       | chr1  | 22636506  | 22639608  | 1173 |
| APOL3      | 0.714458577  | 6.69448E-37 | 1.86735E-34 | UP     | apolipoprotein L3 [Source:HGNC Symbol;Acc:HGNC:14868]                                           | chr22 | 36140330  | 36166177  | 3863 |
| SECTM1     | 0.858340018  | 8.48802E-37 | 2.33176E-34 | UP     | secreted and transmembrane 1 [Source:HGNC Symbol;Acc:HGNC:10707]                                | chr17 | 82321024  | 82333998  | 2235 |
| C1QC       | 0.78364216   | 1.11446E-36 | 3.01585E-34 | UP     | complement C1q C chain [Source:HGNC Symbol;Acc:HGNC:1245]                                       | chr1  | 22643630  | 22648110  | 1335 |
| NLRCS      | 0.646095991  | 1.48711E-36 | 3.96513E-34 | UP     | NLR family CARD domain containing 5 [Source:HGNC Symbol;Acc:HGNC:29933]                         | chr16 | 56989498  | 57083524  | 6822 |
| DHRS2      | -2.054083779 | 8.18633E-36 | 2.12038E-33 | DOWN   | dehydrogenase/reductase 2 [Source:HGNC Symbol;Acc:HGNC:18349]                                   | chr14 | 23636335  | 23645639  | 1727 |
| PDCD1LG2   | 0.852581     | 1.13935E-35 | 2.90953E-33 | UP     | programmed cell death 1 ligand 2 [Source:HGNC Symbol;Acc:HGNC:18731]                            | chr9  | 5510570   | 5511254   | 2365 |
| KLRC2      | 1.375116052  | 3.43238E-35 | 8.6434E-33  | UP     | killer cell lectin like receptor C2 [Source:HGNC Symbol;Acc:HGNC:6375]                          | chr12 | 10430599  | 10442300  | 1401 |
| TNIP3      | 1.045064574  | 4.80969E-34 | 1.16273E-31 | UP     | TNFAIP3 interacting protein 3 [Source:HGNC Symbol;Acc:HGNC:19315]                               | chr4  | 121131408 | 121227466 | 2747 |
| CXCL13     | 1.306050473  | 1.18728E-33 | 2.79565E-31 | UP     | C-X-C motif chemokine ligand 13 [Source:HGNC Symbol;Acc:HGNC:10639]                             | chr4  | 77511753  | 77611834  | 1203 |
| UPK3A      | -1.924986224 | 3.20846E-33 | 7.45802E-31 | DOWN   | uroplakin 3A [Source:HGNC Symbol;Acc:HGNC:12580]                                                | chr22 | 45284982  | 45295874  | 1051 |
| FCER1G     | 0.706169734  | 4.3607E-33  | 1.00081E-30 | UP     | Fc fragment of IgE receptor Ig [Source:HGNC Symbol;Acc:HGNC:3611]                               | chr1  | 161215279 | 161220699 | 919  |
| HAVCR2     | 0.660630352  | 4.58829E-33 | 1.03988E-30 | UP     | hepatitis A virus cellular receptor 2 [Source:HGNC Symbol;Acc:HGNC:18437]                       | chr5  | 157085832 | 157109714 | 2907 |
| SLAMF8     | 0.797617317  | 1.03677E-32 | 2.3207E-30  | UP     | SLAM family member 8 [Source:HGNC Symbol;Acc:HGNC:21391]                                        | chr1  | 159826750 | 159837249 | 2996 |
| CCR5       | 0.76131498   | 1.1051E-32  | 2.44348E-30 | UP     | C-C motif chemokine receptor 5 (gene/pseudogene) [Source:HGNC Symbol;Acc:HGNC:1606]             | chr3  | 46370854  | 46376206  | 3672 |
| UPK2       | -2.003970079 | 1.54797E-32 | 3.38148E-30 | DOWN   | uroplakin 2 [Source:HGNC Symbol;Acc:HGNC:12579]                                                 | chr11 | 118956316 | 118958559 | 916  |
| PDCD1      | 0.997523708  | 5.67832E-32 | 1.22564E-29 | UP     | programmed cell death 1 [Source:HGNC Symbol;Acc:HGNC:8760]                                      | chr2  | 241849881 | 241858908 | 2114 |
| IL4I1      | 0.880300801  | 6.10033E-32 | 1.30124E-29 | UP     | interleukin 4 induced 1 [Source:HGNC Symbol;Acc:HGNC:19094]                                     | chr19 | 49889654  | 49892539  | 2563 |
| DDX60      | 0.61189327   | 6.69321E-32 | 1.4111E-29  | UP     | DEAD/H-box helicase 60 [Source:HGNC Symbol;Acc:HGNC:25942]                                      | chr4  | 168216293 | 168318807 | 6071 |
| AC067945.1 | 0.802936188  | 6.79269E-32 | 1.41561E-29 | UP     |                                                                                                 | chr2  | 190992639 | 190993567 | 618  |
| TNFRSF9    | 0.8845835    | 7.11147E-32 | 1.46521E-29 | UP     | TNF receptor superfamily member 9 [Source:HGNC Symbol;Acc:HGNC:11924]                           | chr1  | 7915894   | 7943165   | 5970 |
| SCUBE2     | -1.193451231 | 2.21355E-31 | 4.41031E-29 | DOWN   | signal peptide, CUB domain and EGF like domain containing 2 [Source:HGNC Symbol;Acc:HGNC:30425] | chr11 | 9020391   | 9091601   | 3814 |
| KLRC1      | 1.070291142  | 3.81817E-31 | 7.52469E-29 | UP     | killer cell lectin like receptor C1 [Source:HGNC Symbol;Acc:HGNC:6374]                          | chr12 | 10442264  | 10454685  | 1798 |
| CD7        | 0.84685707   | 4.20456E-31 | 8.19709E-29 | UP     | CD7 molecule [Source:HGNC Symbol;Acc:HGNC:1695]                                                 | chr17 | 82314868  | 82317602  | 2478 |
| HLA-C      | 0.60749034   | 1.03926E-30 | 1.98346E-28 | UP     | major histocompatibility complex, class I, C [Source:HGNC Symbol;Acc:HGNC:4933]                 | chr6  | 31268749  | 31272086  | 1554 |
| LCP2       | 0.61236827   | 1.61531E-30 | 3.0193E-28  | UP     | lymphocyte cytosolic protein 2 [Source:HGNC Symbol;Acc:HGNC:6529]                               | chr5  | 170246237 | 170298227 | 4912 |
| EPST11     | 0.700087348  | 1.65576E-30 | 3.06333E-28 | UP     | epithelial stromal interaction 1 [Source:HGNC Symbol;Acc:HGNC:16465]                            | chr13 | 42886388  | 42992249  | 3179 |
| VSIG2      | -1.563797544 | 1.70833E-30 | 3.12865E-28 | DOWN   | V-set and immunoglobulin domain containing 2 [Source:HGNC Symbol;Acc:HGNC:17149]                | chr11 | 124747472 | 124752238 | 1432 |
| IL12RB1    | 0.703226864  | 1.90678E-30 | 3.41395E-28 | UP     | interleukin 12 receptor subunit beta 1 [Source:HGNC Symbol;Acc:HGNC:5971]                       | chr19 | 18058995  | 18098944  | 3744 |
| FCGR3A     | 0.835094116  | 2.11386E-30 | 3.72101E-28 | UP     | Fc fragment of IgG receptor IIIa [Source:HGNC Symbol;Acc:HGNC:3619]                             | chr1  | 161541759 | 161550623 | 2478 |
| LILRB4     | 0.764188332  | 3.18673E-30 | 5.5563E-28  | UP     | leukocyte immunoglobulin like receptor B4 [Source:HGNC Symbol;Acc:HGNC:6608]                    | chr19 | 54662128  | 54670359  | 4005 |
| CAB39L     | -0.712644988 | 5.03601E-30 | 8.696E-28   | DOWN   | calcium binding protein 39 like [Source:HGNC Symbol;Acc:HGNC:20290]                             | chr13 | 49308650  | 49444126  | 4295 |
| TBX21      | 0.861300259  | 8.91701E-30 | 1.52523E-27 | UP     | T-box 21 [Source:HGNC Symbol;Acc:HGNC:11599]                                                    | chr17 | 47733244  | 47746119  | 2572 |
| SLAMF7     | 0.809977826  | 2.4623E-29  | 4.1337E-27  | UP     | SLAM family member 7 [Source:HGNC Symbol;Acc:HGNC:21394]                                        | chr1  | 160739057 | 160754821 | 2936 |
| TNFSF13B   | 0.67270847   | 3.52024E-29 | 5.85555E-27 | UP     | TNF superfamily member 13b [Source:HGNC Symbol;Acc:HGNC:11929]                                  | chr13 | 108269629 | 108308484 | 2671 |
| TOX3       | -2.034054321 | 5.09907E-29 | 8.40466E-27 | DOWN   | TOX high mobility group box family member 3 [Source:HGNC Symbol;Acc:HGNC:11972]                 | chr16 | 52438005  | 52547802  | 3499 |
| CASP5      | 1.033858077  | 6.75786E-29 | 1.10385E-26 | UP     | caspase 5 [Source:HGNC Symbol;Acc:HGNC:1506]                                                    | chr11 | 104994240 | 105023168 | 1488 |
| FYB1       | 0.68669795   | 8.79399E-29 | 1.41101E-26 | UP     | FYN binding protein 1 [Source:HGNC Symbol;Acc:HGNC:4036]                                        | chr5  | 39105236  | 39270657  | 5017 |
| KLRC4      | 1.05140922   | 9.01805E-29 | 1.43427E-26 | UP     | killer cell lectin like receptor C4 [Source:HGNC Symbol;Acc:HGNC:6377]                          | chr12 | 10407382  | 10409757  | 930  |
| SIGLEC10   | 0.740173927  | 9.37602E-29 | 1.47823E-26 | UP     | sialic acid binding Ig like lectin 10 [Source:HGNC Symbol;Acc:HGNC:15620]                       | chr19 | 51410021  | 51417803  | 3394 |
| SNX31      | -1.816174048 | 1.14418E-28 | 1.78838E-26 | DOWN   | sorting nexin 31 [Source:HGNC Symbol;Acc:HGNC:28605]                                            | chr8  | 100572882 | 100649665 | 2520 |
| MYZAP      | -0.987142558 | 1.15439E-28 | 1.78891E-26 | DOWN   | myocardial zonula adherens protein [Source:HGNC Symbol;Acc:HGNC:43444]                          | chr15 | 57591941  | 57685364  | 2361 |
| CD74       | 0.642578989  | 2.60572E-28 | 3.97011E-26 | UP     | CD74 molecule [Source:HGNC Symbol;Acc:HGNC:1697]                                                | chr5  | 150401637 | 150412929 | 1674 |
| XAF1       | 0.590248289  | 4.50281E-28 | 6.80338E-26 | UP     | XIAP associated factor 1 [Source:HGNC Symbol;Acc:HGNC:30932]                                    | chr17 | 6755838   | 6775647   | 3625 |
| RTP4       | 0.713438163  | 5.78425E-28 | 8.6673E-26  | UP     | receptor transporter protein 4 [Source:HGNC Symbol;Acc:HGNC:23992]                              | chr3  | 187368332 | 187372076 | 1554 |
| LAP3P2     | 0.65455019   | 6.88407E-28 | 1.02307E-25 | UP     | leucine aminopeptidase 3 pseudogene 2 [Source:HGNC Symbol;Acc:HGNC:42365]                       | chr6  | 36673817  | 36675270  | 1454 |
| CD2        | 0.714641807  | 7.30938E-28 | 1.07745E-25 | UP     | CD2 molecule [Source:HGNC Symbol;Acc:HGNC:1639]                                                 | chr1  | 116754385 | 116769228 | 1679 |
| NCR1       | 0.945295599  | 8.61198E-28 | 1.25922E-25 | UP     | natural cytotoxicity triggering receptor 1 [Source:HGNC Symbol;Acc:HGNC:6731]                   | chr19 | 54906150  | 54916140  | 1628 |
| CD38       | 0.842172359  | 1.43249E-27 | 2.0778E-25  | UP     | CD38 molecule [Source:HGNC Symbol;Acc:HGNC:1667]                                                | chr4  | 15778278  | 15853230  | 5668 |
| RARRES3    | 0.766335338  | 2.13672E-27 | 3.05046E-25 | UP     | retinoic acid receptor responder 3 [Source:HGNC Symbol;Acc:HGNC:9869]                           | chr11 | 63536816  | 63546462  | 1271 |
| VIPR1      | -1.042134444 | 2.52029E-27 | 3.56995E-25 | DOWN   | vasoactive intestinal peptide receptor 1 [Source:HGNC Symbol;Acc:HGNC:12694]                    | chr3  | 42489299  | 42537573  | 3369 |
| CMPK2      | 0.660407507  | 2.65036E-27 | 3.7251E-25  | UP     | cytidine/uridine monophosphate kinase 2 [Source:HGNC Symbol;Acc:HGNC:27015]                     | chr2  | 6840570   | 6865819   | 3916 |
| CYBB       | 0.654848858  | 3.38099E-27 | 4.71545E-25 | UP     | cytochrome b-245 beta chain [Source:HGNC Symbol;Acc:HGNC:2578]                                  | chrX  | 37780011  | 37813461  | 4324 |
| SNX10      | 0.607909094  | 4.24766E-27 | 5.79054E-25 | UP     | sorting nexin 10 [Source:HGNC Symbol;Acc:HGNC:14974]                                            | chr7  | 26291895  | 26374329  | 3060 |
| KLRC1      | 0.834483667  | 4.87392E-27 | 6.59471E-25 | UP     | killer cell lectin like receptor K1 [Source:HGNC Symbol;Acc:HGNC:18788]                         | chr12 | 10372353  | 10390018  | 1654 |

| PARAM      | logFC        | pval        | pval.adj    | UPDOWN | desc                                                                                             | chr   | start     | end       | size  |
|------------|--------------|-------------|-------------|--------|--------------------------------------------------------------------------------------------------|-------|-----------|-----------|-------|
| TLE2       | -0.733103542 | 4.96379E-27 | 6.66655E-25 | DOWN   | transducin like enhancer of split 2 [Source:HGNC Symbol;Acc:HGNC:11838]                          | chr19 | 2997638   | 3047635   | 2929  |
| UPK1A      | -1.859723335 | 5.12819E-27 | 6.83671E-25 | DOWN   | uroplakin 1A [Source:HGNC Symbol;Acc:HGNC:12577]                                                 | chr19 | 35666516  | 35678483  | 1366  |
| ENTPD3     | -1.242722513 | 5.21093E-27 | 6.8963E-25  | DOWN   | ectonucleoside triphosphate diphosphohydrolase 3 [Source:HGNC Symbol;Acc:HGNC:3365]              | chr3  | 40387156  | 40428619  | 3242  |
| PSCA       | -1.698393138 | 9.90577E-27 | 1.23863E-24 | DOWN   | prostate stem cell antigen [Source:HGNC Symbol;Acc:HGNC:9500]                                    | chr8  | 142680456 | 142682724 | 1356  |
| CD3D       | 0.746154657  | 1.32575E-26 | 1.64639E-24 | UP     | CD3d molecule [Source:HGNC Symbol;Acc:HGNC:1673]                                                 | chr11 | 118338954 | 118342744 | 861   |
| CNGA1      | -1.250170427 | 1.43249E-26 | 1.76684E-24 | DOWN   | cyclic nucleotide gated channel alpha 1 [Source:HGNC Symbol;Acc:HGNC:2148]                       | chr4  | 47935977  | 48016592  | 3133  |
| ADAMDEC1   | 0.923907719  | 1.58535E-26 | 1.94216E-24 | UP     | ADAM like decysin 1 [Source:HGNC Symbol;Acc:HGNC:16299]                                          | chr8  | 24384285  | 24406013  | 2348  |
| AC243829.4 | 1.105510437  | 2.07816E-26 | 2.5288E-24  | UP     |                                                                                                  | chr17 | 36072866  | 36090134  | 1630  |
| OR7E91P    | -1.096053603 | 2.10469E-26 | 2.54401E-24 | DOWN   | olfactory receptor family 7 subfamily E member 91 pseudogene [Source:HGNC Symbol;Acc:HGNC:14747] | chr2  | 71024127  | 71029893  | 1198  |
| CCL8       | 1.023039025  | 2.13619E-26 | 2.56498E-24 | UP     | C-C motif chemokine ligand 8 [Source:HGNC Symbol;Acc:HGNC:10635]                                 | chr17 | 34319036  | 34321402  | 1261  |
| HCP5       | 0.771483328  | 2.79114E-26 | 3.30759E-24 | UP     | HLA complex P5 (non-protein coding) [Source:HGNC Symbol;Acc:HGNC:21659]                          | chr6  | 31400702  | 31465809  | 2658  |
| PLA2G2F    | -1.757231916 | 3.14637E-26 | 3.68044E-24 | DOWN   | phospholipase A2 group IIF [Source:HGNC Symbol;Acc:HGNC:30040]                                   | chr1  | 20139326  | 20150386  | 2723  |
| TLR8       | 0.735157552  | 3.2873E-26  | 3.82064E-24 | UP     | toll like receptor 8 [Source:HGNC Symbol;Acc:HGNC:15632]                                         | chrX  | 12906620  | 12923169  | 4353  |
| GRHL3      | -1.433287566 | 4.02905E-26 | 4.65291E-24 | DOWN   | grainyhead like transcription factor 3 [Source:HGNC Symbol;Acc:HGNC:25839]                       | chr1  | 24319322  | 24364482  | 3424  |
| BCAS1      | -1.56069073  | 5.71671E-26 | 6.56011E-24 | DOWN   | breast carcinoma amplified sequence 1 [Source:HGNC Symbol;Acc:HGNC:974]                          | chr20 | 53943541  | 54070594  | 3303  |
| BST2       | 0.72282603   | 6.29662E-26 | 7.18012E-24 | UP     | bone marrow stromal cell antigen 2 [Source:HGNC Symbol;Acc:HGNC:1119]                            | chr19 | 17402939  | 17405648  | 1019  |
| SLC9A4     | -1.703847518 | 6.57206E-26 | 7.40112E-24 | DOWN   | solute carrier family 9 member A4 [Source:HGNC Symbol;Acc:HGNC:11077]                            | chr2  | 102473303 | 102533972 | 4138  |
| ACER2      | -1.090578639 | 7.34946E-26 | 8.2255E-24  | DOWN   | alkaline ceramidase 2 [Source:HGNC Symbol;Acc:HGNC:23675]                                        | chr9  | 19409059  | 19452020  | 2238  |
| UPK3B      | -1.375469363 | 7.595E-26   | 8.44815E-24 | DOWN   | uroplakin 3B [Source:HGNC Symbol;Acc:HGNC:21444]                                                 | chr7  | 76510428  | 76516521  | 2538  |
| OAS2       | 0.657428118  | 1.12509E-25 | 1.24384E-23 | UP     | 2'-5'-oligoadenylate synthetase 2 [Source:HGNC Symbol;Acc:HGNC:8087]                             | chr12 | 112978395 | 113011723 | 6243  |
| RUFY4      | 0.969421219  | 1.81268E-25 | 1.99186E-23 | UP     | RUN and FYVE domain containing 4 [Source:HGNC Symbol;Acc:HGNC:24804]                             | chr2  | 218069255 | 218090580 | 2981  |
| KSR2       | -1.303542059 | 1.87504E-25 | 2.04797E-23 | DOWN   | kinase suppressor of ras 2 [Source:HGNC Symbol;Acc:HGNC:18610]                                   | chr12 | 117453012 | 117968983 | 17768 |
| IGSF6      | 0.655175305  | 2.08545E-25 | 2.25068E-23 | UP     | immunoglobulin superfamily member 6 [Source:HGNC Symbol;Acc:HGNC:5953]                           | chr16 | 21639537  | 21652660  | 2785  |
| CRTAM      | 0.798145452  | 2.9344E-25  | 3.14814E-23 | UP     | cytotoxic and regulatory T-cell molecule [Source:HGNC Symbol;Acc:HGNC:24313]                     | chr11 | 122838500 | 122872639 | 2630  |
| FCGR1A     | 0.859437906  | 3.52846E-25 | 3.76321E-23 | UP     | Fc fragment of IgG receptor Ia [Source:HGNC Symbol;Acc:HGNC:3613]                                | chr1  | 149782690 | 149792518 | 2180  |
| OASL       | 0.748020959  | 4.59757E-25 | 4.84642E-23 | UP     | 2'-5'-oligoadenylate synthetase like [Source:HGNC Symbol;Acc:HGNC:8090]                          | chr12 | 121019111 | 121039242 | 3266  |
| RHOU       | -0.716396737 | 6.98051E-25 | 7.31582E-23 | DOWN   | ras homolog family member U [Source:HGNC Symbol;Acc:HGNC:17794]                                  | chr1  | 228735077 | 228746669 | 4372  |
| CR1L       | 1.030515573  | 7.17938E-25 | 7.481E-23   | UP     | complement C3b/C4b receptor 1 like [Source:HGNC Symbol;Acc:HGNC:2335]                            | chr1  | 207645174 | 207723703 | 1788  |
| PLEK       | 0.645510416  | 7.58366E-25 | 7.85711E-23 | UP     | pleckstrin [Source:HGNC Symbol;Acc:HGNC:9070]                                                    | chr2  | 68365173  | 68397453  | 2869  |
| CD8B       | 0.870850264  | 8.43353E-25 | 8.63889E-23 | UP     | CD8b molecule [Source:HGNC Symbol;Acc:HGNC:1707]                                                 | chr2  | 86815339  | 86861924  | 1864  |
| ZBTB7C     | -1.044016472 | 1.01469E-24 | 1.03356E-22 | DOWN   | zinc finger and BTB domain containing 7C [Source:HGNC Symbol;Acc:HGNC:31700]                     | chr18 | 48026673  | 48409422  | 5788  |
| AL691482.3 | -1.051738598 | 1.05032E-24 | 1.06388E-22 | DOWN   |                                                                                                  | chr1  | 202011370 | 202015657 | 987   |
| AIM2       | 0.960564239  | 1.08095E-24 | 1.08882E-22 | UP     | absent in melanoma 2 [Source:HGNC Symbol;Acc:HGNC:357]                                           | chr1  | 159062484 | 159076901 | 1529  |
| SPINK1     | -1.99240175  | 1.15891E-24 | 1.16089E-22 | DOWN   | serine peptidase inhibitor, kazal type 1 [Source:HGNC Symbol;Acc:HGNC:11244]                     | chr5  | 147824568 | 147831786 | 1478  |
| GAREM1     | -0.652592738 | 1.36786E-24 | 1.35523E-22 | DOWN   | GRB2 associated regulator of MAPK1 subtype 1 [Source:HGNC Symbol;Acc:HGNC:26136]                 | chr18 | 32263522  | 32470484  | 7036  |
| BMP3       | -1.475561453 | 1.58201E-24 | 1.55889E-22 | DOWN   | bone morphogenetic protein 3 [Source:HGNC Symbol;Acc:HGNC:1070]                                  | chr4  | 81030965  | 81057531  | 5734  |
| WSCD2      | -1.258377479 | 1.90163E-24 | 1.8637E-22  | DOWN   | WSC domain containing 2 [Source:HGNC Symbol;Acc:HGNC:29117]                                      | chr12 | 108129471 | 108250537 | 5226  |
| CCL3       | 0.847227565  | 1.92019E-24 | 1.87178E-22 | UP     | C-C motif chemokine ligand 3 [Source:HGNC Symbol;Acc:HGNC:10627]                                 | chr17 | 36088256  | 36090141  | 778   |
| CD70       | 1.110412732  | 1.95388E-24 | 1.89443E-22 | UP     | CD70 molecule [Source:HGNC Symbol;Acc:HGNC:11937]                                                | chr19 | 6583183   | 6591152   | 1209  |
| LILRB1     | 0.629235118  | 2.10703E-24 | 2.03205E-22 | UP     | leukocyte immunoglobulin like receptor B1 [Source:HGNC Symbol;Acc:HGNC:6605]                     | chr19 | 54617158  | 54637528  | 3504  |
| MSX2       | -1.029741598 | 2.16996E-24 | 2.08167E-22 | DOWN   | msh homeobox 2 [Source:HGNC Symbol;Acc:HGNC:7392]                                                | chr5  | 174724533 | 174730893 | 2270  |
| HLA-DMB    | 0.611276298  | 2.32005E-24 | 2.21394E-22 | UP     | major histocompatibility complex, class II, DM beta [Source:HGNC Symbol;Acc:HGNC:4935]           | chr6  | 32934629  | 32941070  | 1397  |
| RAB15      | -0.691160428 | 2.48661E-24 | 2.36046E-22 | DOWN   | RAB15, member RAS oncogene family [Source:HGNC Symbol;Acc:HGNC:20150]                            | chr14 | 64945814  | 64972414  | 3697  |
| HAPLN3     | 0.651110745  | 2.51578E-24 | 2.3757E-22  | UP     | hyaluronan and proteoglycan link protein 3 [Source:HGNC Symbol;Acc:HGNC:21446]                   | chr15 | 88877288  | 88895626  | 2119  |
| FAM174B    | -0.817899315 | 2.88492E-24 | 2.71018E-22 | DOWN   | family with sequence similarity 174 member B [Source:HGNC Symbol;Acc:HGNC:34339]                 | chr15 | 92617443  | 92655958  | 3224  |
| NDRG2      | -0.677678318 | 3.20868E-24 | 2.99879E-22 | DOWN   | NDRG family member 2 [Source:HGNC Symbol;Acc:HGNC:14460]                                         | chr14 | 21016763  | 21070872  | 3873  |
| THRB       | -0.743574586 | 3.6609E-24  | 3.40389E-22 | DOWN   | thyroid hormone receptor beta [Source:HGNC Symbol;Acc:HGNC:11799]                                | chr3  | 24117160  | 24494822  | 8247  |
| FMO9P      | -1.633595483 | 3.75459E-24 | 3.47319E-22 | DOWN   | flavin containing monoxygenase 9 pseudogene [Source:HGNC Symbol;Acc:HGNC:32210]                  | chr1  | 166603916 | 166631400 | 2270  |
| FRY        | -0.59624051  | 3.92628E-24 | 3.61357E-22 | DOWN   | FRY microtubule binding protein [Source:HGNC Symbol;Acc:HGNC:20367]                              | chr13 | 32031300  | 32299122  | 13209 |
| GDF15      | -1.056010455 | 4.5081E-24  | 4.1281E-22  | DOWN   | growth differentiation factor 15 [Source:HGNC Symbol;Acc:HGNC:30142]                             | chr19 | 18386158  | 18389176  | 1200  |
| TFEC       | 0.652598217  | 4.83305E-24 | 4.40342E-22 | UP     | transcription factor EC [Source:HGNC Symbol;Acc:HGNC:11754]                                      | chr7  | 115935148 | 116159896 | 8163  |
| KCNJ10     | 1.216881176  | 6.63164E-24 | 6.01192E-22 | UP     | potassium voltage-gated channel subfamily J member 10 [Source:HGNC Symbol;Acc:HGNC:6256]         | chr1  | 159998651 | 160070483 | 6575  |
| ADIRF      | -1.078539545 | 6.70004E-24 | 6.0437E-22  | DOWN   | adipogenesis regulatory factor [Source:HGNC Symbol;Acc:HGNC:24043]                               | chr10 | 86968192  | 86970915  | 917   |
| SLFN12L    | 0.643582697  | 8.21641E-24 | 7.30254E-22 | UP     | schlafen family member 12 like [Source:HGNC Symbol;Acc:HGNC:33920]                               | chr17 | 35473689  | 35537861  | 4113  |
| PTPN22     | 0.616496195  | 1.05977E-23 | 9.32749E-22 | UP     | protein tyrosine phosphatase, non-receptor type 22 [Source:HGNC Symbol;Acc:HGNC:9652]            | chr1  | 113813811 | 113871759 | 3932  |
| GIMAP5     | 0.693637108  | 1.22189E-23 | 1.0651E-21  | UP     | GTPase, IMAP family member 5 [Source:HGNC Symbol;Acc:HGNC:18005]                                 | chr7  | 150722253 | 150744063 | 2409  |

| PARAM      | logFC        | pval        | pval.adj    | UPDOWN | desc                                                                                             | chr   | start     | end       | size  |
|------------|--------------|-------------|-------------|--------|--------------------------------------------------------------------------------------------------|-------|-----------|-----------|-------|
| SLC9A2     | -1.395035779 | 1.36963E-23 | 1.18553E-21 | DOWN   | solute carrier family 9 member A2 [Source:HGNC Symbol;Acc:HGNC:11072]                            | chr2  | 102619707 | 102711318 | 5410  |
| CLEC6A     | 0.959827999  | 1.37312E-23 | 1.18553E-21 | UP     | C-type lectin domain containing 6A [Source:HGNC Symbol;Acc:HGNC:14556]                           | chr12 | 8455926   | 8478330   | 1682  |
| SYTL5      | -1.27803131  | 1.54549E-23 | 1.32803E-21 | DOWN   | synaptotagmin like 5 [Source:HGNC Symbol;Acc:HGNC:15589]                                         | chrX  | 38006582  | 38128819  | 4791  |
| CD3G       | 0.685677373  | 1.61844E-23 | 1.38415E-21 | UP     | CD3g molecule [Source:HGNC Symbol;Acc:HGNC:1675]                                                 | chr11 | 118344340 | 118355161 | 2690  |
| AC061975.7 | -1.090273956 | 2.04122E-23 | 1.73753E-21 | DOWN   |                                                                                                  | chr17 | 28232590  | 28235281  | 2692  |
| TM7SF2     | -0.603555375 | 2.47854E-23 | 2.09016E-21 | DOWN   | transmembrane 7 superfamily member 2 [Source:HGNC Symbol;Acc:HGNC:11863]                         | chr11 | 65111854  | 65116356  | 1722  |
| IFI44L     | 0.859179242  | 2.51111E-23 | 2.10782E-21 | UP     | interferon induced protein 44 like [Source:HGNC Symbol;Acc:HGNC:17817]                           | chr1  | 78620403  | 78646145  | 5874  |
| IFIT2      | 0.588316525  | 3.0938E-23  | 2.58496E-21 | UP     | interferon induced protein with tetratricopeptide repeats 2 [Source:HGNC Symbol;Acc:HGNC:5409]   | chr10 | 89283694  | 89309276  | 4101  |
| CYP4F23P   | -1.150385654 | 4.45007E-23 | 3.68421E-21 | DOWN   | cytochrome P450 family 4 subfamily F member 23, pseudogene [Source:HGNC Symbol;Acc:HGNC:39944]   | chr19 | 15564074  | 15584709  | 1579  |
| HID1       | -0.800754086 | 5.10463E-23 | 4.20691E-21 | DOWN   | HID1 domain containing [Source:HGNC Symbol;Acc:HGNC:15736]                                       | chr17 | 74950744  | 74972734  | 3271  |
| JAKMIP1    | 0.773677417  | 6.23791E-23 | 5.09457E-21 | UP     | janus kinase and microtubule interacting protein 1 [Source:HGNC Symbol;Acc:HGNC:26460]           | chr4  | 6026199   | 6200591   | 3572  |
| HERC5      | 0.601490425  | 7.48169E-23 | 6.05582E-21 | UP     | HECT and RLD domain containing E3 ubiquitin protein ligase 5 [Source:HGNC Symbol;Acc:HGNC:24368] | chr4  | 88457117  | 88506163  | 3594  |
| TRDC       | 0.837325183  | 7.83383E-23 | 6.31268E-21 | UP     | T-cell receptor delta constant [Source:HGNC Symbol;Acc:HGNC:12253]                               | chr14 | 22462932  | 22465787  | 720   |
| IL2RG      | 0.677685535  | 8.70385E-23 | 6.95196E-21 | UP     | interleukin 2 receptor subunit gamma [Source:HGNC Symbol;Acc:HGNC:6010]                          | chrX  | 71107404  | 71111631  | 1534  |
| UPK1B      | -1.815308003 | 1.01973E-22 | 8.10909E-21 | DOWN   | uroplakin 1B [Source:HGNC Symbol;Acc:HGNC:12578]                                                 | chr3  | 119173517 | 119205153 | 2119  |
| CXCR3      | 0.833797016  | 1.0496E-22  | 8.31014E-21 | UP     | C-X-C motif chemokine receptor 3 [Source:HGNC Symbol;Acc:HGNC:4540]                              | chrX  | 71615916  | 71618517  | 1868  |
| NEIL3      | 0.586696326  | 1.25612E-22 | 9.90202E-21 | UP     | nei like DNA glycosylase 3 [Source:HGNC Symbol;Acc:HGNC:24573]                                   | chr4  | 177309836 | 177362943 | 2408  |
| SLC7A7     | 0.584983642  | 1.4954E-22  | 1.16867E-20 | UP     | solute carrier family 7 member 7 [Source:HGNC Symbol;Acc:HGNC:11065]                             | chr14 | 22773222  | 22819811  | 2698  |
| AC091492.1 | -0.981623888 | 1.52006E-22 | 1.18284E-20 | DOWN   |                                                                                                  | chr3  | 12328003  | 12328274  | 272   |
| HLA-DRA    | 0.5957115    | 1.5933E-22  | 1.2345E-20  | UP     | major histocompatibility complex, class II, DR alpha [Source:HGNC Symbol;Acc:HGNC:4947]          | chr6  | 32439842  | 32445046  | 1280  |
| KLHDC7B    | 1.084037227  | 1.60007E-22 | 1.2345E-20  | UP     | kelch domain containing 7B [Source:HGNC Symbol;Acc:HGNC:25145]                                   | chr22 | 50548033  | 50551023  | 2991  |
| TRAC       | 0.664224     | 1.72442E-22 | 1.32481E-20 | UP     | T-cell receptor alpha constant [Source:HGNC Symbol;Acc:HGNC:12029]                               | chr14 | 22547506  | 22552154  | 976   |
| PTCHD1     | -1.298691001 | 1.84681E-22 | 1.40691E-20 | DOWN   | patched domain containing 1 [Source:HGNC Symbol;Acc:HGNC:26392]                                  | chrX  | 23334016  | 23404372  | 13714 |
| ARFGEF3    | -0.797356008 | 1.90341E-22 | 1.44396E-20 | DOWN   | ARFGEF family member 3 [Source:HGNC Symbol;Acc:HGNC:21213]                                       | chr6  | 138161921 | 138344663 | 14877 |
| SLA2       | 0.709933379  | 2.35201E-22 | 1.76947E-20 | UP     | Src like adaptor 2 [Source:HGNC Symbol;Acc:HGNC:17329]                                           | chr20 | 36612318  | 36646216  | 2757  |
| HLA-DPA1   | 0.587899043  | 3.45832E-22 | 2.56979E-20 | UP     | major histocompatibility complex, class II, DP alpha 1 [Source:HGNC Symbol;Acc:HGNC:4938]        | chr6  | 33064569  | 33080710  | 1704  |
| TIGIT      | 0.691707046  | 4.22168E-22 | 3.12422E-20 | UP     | T-cell immunoreceptor with Ig and ITIM domains [Source:HGNC Symbol;Acc:HGNC:26838]               | chr3  | 114291059 | 114310288 | 5708  |
| FCGR1B     | 0.899039934  | 4.54654E-22 | 3.33738E-20 | UP     | Fc fragment of IgG receptor 1b [Source:HGNC Symbol;Acc:HGNC:3614]                                | chr1  | 121087345 | 121096310 | 2023  |
| TBX2       | -0.738465181 | 5.21914E-22 | 3.81565E-20 | DOWN   | T-box 2 [Source:HGNC Symbol;Acc:HGNC:11597]                                                      | chr17 | 61399896  | 61409425  | 3339  |
| SLITRK6    | -1.389746697 | 5.98037E-22 | 4.35462E-20 | DOWN   | SLIT and NTRK like family member 6 [Source:HGNC Symbol;Acc:HGNC:23503]                           | chr13 | 85792790  | 85799488  | 4318  |
| HCST       | 0.59941477   | 6.08582E-22 | 4.41368E-20 | UP     | hematopoietic cell signal transducer [Source:HGNC Symbol;Acc:HGNC:16977]                         | chr19 | 35902480  | 35904377  | 613   |
| OSR1       | -0.884354094 | 6.42727E-22 | 4.64274E-20 | DOWN   | odd-skipped related transcription factor 1 [Source:HGNC Symbol;Acc:HGNC:8111]                    | chr2  | 19351485  | 19358653  | 1936  |
| KLHDC7A    | -1.309133411 | 7.03428E-22 | 5.04105E-20 | DOWN   | kelch domain containing 7A [Source:HGNC Symbol;Acc:HGNC:26791]                                   | chr1  | 18480982  | 18486126  | 5145  |
| GGT6       | -1.297973601 | 7.97483E-22 | 5.67026E-20 | DOWN   | gamma-glutamyltransferase 6 [Source:HGNC Symbol;Acc:HGNC:26891]                                  | chr17 | 4556927   | 4560818   | 3060  |
| SIRPG      | 0.754889321  | 8.91725E-22 | 6.24242E-20 | UP     | signal regulatory protein gamma [Source:HGNC Symbol;Acc:HGNC:15757]                              | chr20 | 1629152   | 1657779   | 1870  |
| SLC2A10    | -0.625086843 | 9.8925E-22  | 6.84583E-20 | DOWN   | solute carrier family 2 member 10 [Source:HGNC Symbol;Acc:HGNC:13444]                            | chr20 | 46709487  | 46736347  | 4844  |
| INA        | -1.38081961  | 1.28148E-21 | 8.70203E-20 | DOWN   | internexin neuronal intermediate filament protein alpha [Source:HGNC Symbol;Acc:HGNC:6057]       | chr10 | 103277163 | 103290351 | 3231  |
| DOCK3      | -0.938486457 | 1.28876E-21 | 8.71885E-20 | DOWN   | dedicator of cytokinesis 3 [Source:HGNC Symbol;Acc:HGNC:2989]                                    | chr3  | 50675241  | 51384198  | 8755  |
| EOMES      | 0.727299369  | 1.45813E-21 | 9.82803E-20 | UP     | eomesodermin [Source:HGNC Symbol;Acc:HGNC:3372]                                                  | chr3  | 27715949  | 27722711  | 3656  |
| HMGCS2     | -1.875181508 | 1.51494E-21 | 1.01355E-19 | DOWN   | 3-hydroxy-3-methylglutaryl-CoA synthase 2 [Source:HGNC Symbol;Acc:HGNC:5008]                     | chr1  | 119747996 | 119768905 | 2439  |
| IFITM1     | 0.622989193  | 1.65889E-21 | 1.10578E-19 | UP     | interferon induced transmembrane protein 1 [Source:HGNC Symbol;Acc:HGNC:5412]                    | chr11 | 313506    | 315272    | 1041  |
| ODF3B      | 0.609318361  | 2.2351E-21  | 1.46828E-19 | UP     | outer dense fiber of sperm tails 3B [Source:HGNC Symbol;Acc:HGNC:34388]                          | chr22 | 50530409  | 50532579  | 1089  |
| IL21R      | 0.692395301  | 2.28638E-21 | 1.49654E-19 | UP     | interleukin 21 receptor [Source:HGNC Symbol;Acc:HGNC:6006]                                       | chr16 | 27402162  | 27452042  | 5108  |
| IFI44      | 0.638800934  | 2.41344E-21 | 1.56839E-19 | UP     | interferon induced protein 44 [Source:HGNC Symbol;Acc:HGNC:16938]                                | chr1  | 78649831  | 78664078  | 1687  |
| RBBP8NL    | -1.016061769 | 2.46847E-21 | 1.59842E-19 | DOWN   | RBBP8 N-terminal like [Source:HGNC Symbol;Acc:HGNC:16144]                                        | chr20 | 62410237  | 62427533  | 2793  |
| CD3E       | 0.64016109   | 2.58711E-21 | 1.66928E-19 | UP     | CD3e molecule [Source:HGNC Symbol;Acc:HGNC:1674]                                                 | chr11 | 118304545 | 118316175 | 1548  |
| ELF3       | -0.971171484 | 2.75732E-21 | 1.7728E-19  | DOWN   | E74 like ETS transcription factor 3 [Source:HGNC Symbol;Acc:HGNC:3318]                           | chr1  | 202007945 | 202017188 | 6173  |
| IL32       | 0.631944389  | 2.84353E-21 | 1.81641E-19 | UP     | Interleukin 32 [Source:HGNC Symbol;Acc:HGNC:16830]                                               | chr16 | 3065297   | 3069819   | 1684  |
| IL18RAP    | 0.665147553  | 2.84519E-21 | 1.81641E-19 | UP     | interleukin 18 receptor accessory protein [Source:HGNC Symbol;Acc:HGNC:5989]                     | chr2  | 102418689 | 102452565 | 2773  |
| ITGAL      | 0.595848928  | 3.24361E-21 | 2.0635E-19  | UP     | integrin subunit alpha L [Source:HGNC Symbol;Acc:HGNC:6148]                                      | chr16 | 30472658  | 30523185  | 5213  |
| LINC01341  | -0.760055755 | 3.34302E-21 | 2.1123E-19  | DOWN   | long intergenic non-protein coding RNA 1341 [Source:HGNC Symbol;Acc:HGNC:49457]                  | chr1  | 246776013 | 246792385 | 2693  |
| PPARG      | -0.93311516  | 3.34361E-21 | 2.1123E-19  | DOWN   | peroxisome proliferator activated receptor gamma [Source:HGNC Symbol;Acc:HGNC:9236]              | chr3  | 12287368  | 12434356  | 2951  |
| GDPP3      | -0.681228411 | 3.50072E-21 | 2.20387E-19 | DOWN   | glycerophosphodiester phosphodiesterase domain containing 3 [Source:HGNC Symbol;Acc:HGNC:28638]  | chr16 | 30104810  | 30113856  | 1397  |
| CACNA1D    | -0.981005818 | 3.87541E-21 | 2.43132E-19 | DOWN   | calcium voltage-gated channel subunit alpha 1 D [Source:HGNC Symbol;Acc:HGNC:1391]               | chr3  | 53328963  | 53813733  | 11489 |
| CLEC2B     | 0.625324672  | 4.0055E-21  | 2.49566E-19 | UP     | C-type lectin domain family 2 member B [Source:HGNC Symbol;Acc:HGNC:2053]                        | chr12 | 9852984   | 9870136   | 2065  |
| HNRNP1P7   | -0.725391741 | 5.09439E-21 | 3.14171E-19 | DOWN   | heterogeneous nuclear ribonucleoprotein A1 pseudogene 7 [Source:HGNC Symbol;Acc:HGNC:31015]      | chr18 | 32412214  | 32413176  | 963   |

| PARAM      | logFC        | pval        | pval.adj    | UPDOWN | desc                                                                                           | chr   | start     | end       | size  |
|------------|--------------|-------------|-------------|--------|------------------------------------------------------------------------------------------------|-------|-----------|-----------|-------|
| CD247      | 0.617360388  | 5.37819E-21 | 3.29432E-19 | UP     | CD247 molecule [Source:HGNC Symbol;Acc:HGNC:1677]                                              | chr1  | 167430640 | 167518610 | 1681  |
| TRGV9      | 0.832979346  | 5.70611E-21 | 3.48025E-19 | UP     | T-cell receptor gamma variable 9 [Source:HGNC Symbol;Acc:HGNC:12295]                           | chr7  | 38317017  | 38318861  | 1735  |
| LILRB2     | 0.58905939   | 5.95621E-21 | 3.61178E-19 | UP     | leukocyte immunoglobulin like receptor B2 [Source:HGNC Symbol;Acc:HGNC:6606]                   | chr19 | 54273821  | 54281184  | 3011  |
| ALG7188B.3 | 0.962714656  | 6.0792E-21  | 3.67406E-19 | UP     |                                                                                                | chr6  | 31356647  | 31357637  | 991   |
| NCF1       | 0.69796286   | 6.16454E-21 | 3.71326E-19 | UP     | neutrophil cytosolic factor 1 [Source:HGNC Symbol;Acc:HGNC:7660]                               | chr7  | 74773962  | 74789313  | 1396  |
| CMKLR1     | 0.608521138  | 7.18452E-21 | 4.29909E-19 | UP     | chemerin chemokine-like receptor 1 [Source:HGNC Symbol;Acc:HGNC:2121]                          | chr12 | 108288044 | 108339341 | 5638  |
| FREM2      | -1.556147695 | 8.01027E-21 | 4.76178E-19 | DOWN   | FRAS1 related extracellular matrix protein 2 [Source:HGNC Symbol;Acc:HGNC:25396]               | chr13 | 38687129  | 38887131  | 16070 |
| AC098934.1 | -0.908553014 | 8.18302E-21 | 4.84444E-19 | DOWN   |                                                                                                | chr1  | 202851828 | 202861620 | 2838  |
| VGLL1      | -1.138614625 | 8.22948E-21 | 4.84444E-19 | DOWN   | vestigial like family member 1 [Source:HGNC Symbol;Acc:HGNC:20985]                             | chrX  | 136532152 | 136556807 | 1215  |
| RNF128     | -1.132877336 | 9.10631E-21 | 5.34325E-19 | DOWN   | ring finger protein 128, E3 ubiquitin protein ligase [Source:HGNC Symbol;Acc:HGNC:21153]       | chrX  | 106693838 | 106796993 | 3388  |
| TRGV10     | 0.794264847  | 1.00809E-20 | 5.87708E-19 | UP     | T-cell receptor gamma variable 10 (non-functional) [Source:HGNC Symbol;Acc:HGNC:12285]         | chr7  | 38299811  | 38300322  | 512   |
| PTPN7      | 0.605143938  | 1.09504E-20 | 6.36351E-19 | UP     | protein tyrosine phosphatase, non-receptor type 7 [Source:HGNC Symbol;Acc:HGNC:9659]           | chr1  | 202147013 | 202161581 | 4302  |
| PALM3      | -1.221239909 | 1.10283E-20 | 6.38829E-19 | DOWN   | paralemmin 3 [Source:HGNC Symbol;Acc:HGNC:33274]                                               | chr19 | 14053365  | 14059159  | 2262  |
| TMEM184A   | -0.947069732 | 1.25371E-20 | 7.21619E-19 | DOWN   | transmembrane protein 184A [Source:HGNC Symbol;Acc:HGNC:28797]                                 | chr7  | 1542235   | 1556430   | 6276  |
| SORL1      | -0.606592829 | 1.30382E-20 | 7.48089E-19 | DOWN   | sortilin related receptor 1 [Source:HGNC Symbol;Acc:HGNC:11185]                                | chr11 | 121452203 | 121633693 | 11881 |
| ELF5       | -1.337655024 | 1.31673E-20 | 7.53113E-19 | DOWN   | E74 like ETS transcription factor 5 [Source:HGNC Symbol;Acc:HGNC:3320]                         | chr11 | 34478793  | 34513805  | 4464  |
| ZNF321P    | -0.670973207 | 1.81216E-20 | 1.02356E-18 | DOWN   | zinc finger protein 321, pseudogene [Source:HGNC Symbol;Acc:HGNC:13827]                        | chr19 | 52927135  | 52942601  | 2341  |
| IFI27      | 0.852048337  | 1.90206E-20 | 1.071E-18   | UP     | interferon alpha inducible protein 27 [Source:HGNC Symbol;Acc:HGNC:5397]                       | chr14 | 94110733  | 94116698  | 827   |
| PLA2G4F    | -1.185096544 | 2.10739E-20 | 1.18294E-18 | DOWN   | phospholipase A2 group IVF [Source:HGNC Symbol;Acc:HGNC:27396]                                 | chr15 | 42139034  | 42156636  | 5587  |
| PLEKHG6    | -0.90281535  | 2.48835E-20 | 1.38819E-18 | DOWN   | pleckstrin homology and RhoGEF domain containing G6 [Source:HGNC Symbol;Acc:HGNC:25562]        | chr12 | 6310436   | 6328506   | 4001  |
| EPN3       | -1.001899472 | 3.02324E-20 | 1.68142E-18 | DOWN   | epsin 3 [Source:HGNC Symbol;Acc:HGNC:18235]                                                    | chr17 | 50532543  | 50543750  | 4114  |
| HLA-DOA    | 0.599244566  | 3.36353E-20 | 1.85927E-18 | UP     | major histocompatibility complex, class II, DO alpha [Source:HGNC Symbol;Acc:HGNC:4936]        | chr6  | 33004178  | 33009612  | 3489  |
| BICDL2     | -0.931379532 | 3.38751E-20 | 1.86684E-18 | DOWN   | BICD family like cargo adaptor 2 [Source:HGNC Symbol;Acc:HGNC:33584]                           | chr16 | 3027684   | 3036926   | 3879  |
| LNX1       | -0.6450412   | 3.56029E-20 | 1.95611E-18 | DOWN   | ligand of numb-protein X1 [Source:HGNC Symbol;Acc:HGNC:6657]                                   | chr4  | 53459301  | 53591616  | 4452  |
| SPTS5B     | -1.285908023 | 3.69282E-20 | 2.0167E-18  | DOWN   | serine palmitoyltransferase small subunit B [Source:HGNC Symbol;Acc:HGNC:24045]                | chr3  | 161344792 | 161372880 | 3242  |
| ADAMTS19   | -1.116727229 | 3.77417E-20 | 2.05494E-18 | DOWN   | ADAM metalloproteinase with thrombospondin type 1 motif 19 [Source:HGNC Symbol;Acc:HGNC:17111] | chr5  | 129460265 | 129738683 | 5234  |
| CGN        | -0.911898583 | 4.2515E-20  | 2.3079E-18  | DOWN   | cingulin [Source:HGNC Symbol;Acc:HGNC:17429]                                                   | chr1  | 151511397 | 151538692 | 5091  |
| RAP1GAP    | -0.868316324 | 5.5518E-20  | 2.97496E-18 | DOWN   | RAP1 GTPase activating protein [Source:HGNC Symbol;Acc:HGNC:9858]                              | chr1  | 21596215  | 21596363  | 3984  |
| SIGLEC1    | 0.602369959  | 5.56236E-20 | 2.97496E-18 | UP     | sialic acid binding Ig like lectin 1 [Source:HGNC Symbol;Acc:HGNC:11127]                       | chr20 | 3686970   | 3707128   | 6720  |
| SLIT3      | -0.698046671 | 6.75516E-20 | 3.59172E-18 | DOWN   | slit guidance ligand 3 [Source:HGNC Symbol;Acc:HGNC:11087]                                     | chr5  | 168661733 | 169301129 | 9736  |
| TMEM45B    | -1.167724134 | 6.81421E-20 | 3.61253E-18 | DOWN   | transmembrane protein 45B [Source:HGNC Symbol;Acc:HGNC:25194]                                  | chr11 | 129815819 | 129860003 | 2507  |
| S100P      | -1.327634117 | 7.87095E-20 | 4.14849E-18 | DOWN   | S100 calcium binding protein P [Source:HGNC Symbol;Acc:HGNC:10504]                             | chr4  | 6693069   | 6697169   | 1279  |
| RHBG       | -1.217640363 | 7.99363E-20 | 4.20094E-18 | DOWN   | Rh family B glycoprotein (gene/pseudogene) [Source:HGNC Symbol;Acc:HGNC:14572]                 | chr1  | 156369212 | 156385219 | 1789  |
| RSAD2      | 0.657726447  | 8.62632E-20 | 4.52034E-18 | UP     | radical S-adenosyl methionine domain containing 2 [Source:HGNC Symbol;Acc:HGNC:30908]          | chr2  | 6877665   | 6898239   | 3519  |
| RUNX3      | 0.603591985  | 9.16905E-20 | 4.77713E-18 | UP     | runt related transcription factor 3 [Source:HGNC Symbol;Acc:HGNC:10473]                        | chr1  | 24899511  | 24965010  | 4365  |
| CAPN5      | -0.701093091 | 1.07826E-19 | 5.58572E-18 | DOWN   | calpain 5 [Source:HGNC Symbol;Acc:HGNC:1482]                                                   | chr11 | 77066932  | 77126155  | 4599  |
| TRGC2      | 0.808585332  | 1.18827E-19 | 6.1277E-18  | UP     | T-cell receptor gamma constant 2 [Source:HGNC Symbol;Acc:HGNC:12276]                           | chr7  | 38239580  | 38249572  | 1013  |
| GF1        | 0.603039701  | 1.2937E-19  | 6.66364E-18 | UP     | growth factor independent 1 transcriptional repressor [Source:HGNC Symbol;Acc:HGNC:4237]       | chr1  | 92474762  | 92486876  | 3064  |
| HLA-DRB1   | 0.595743775  | 1.50619E-19 | 7.67101E-18 | UP     | major histocompatibility complex, class II, DR beta 1 [Source:HGNC Symbol;Acc:HGNC:4948]       | chr6  | 32578769  | 32589848  | 1229  |
| CCSER1     | -0.794664974 | 1.52271E-19 | 7.73339E-18 | DOWN   | coiled-coil serine rich protein 1 [Source:HGNC Symbol;Acc:HGNC:29349]                          | chr4  | 90127585  | 91601913  | 7723  |
| TRBV9      | 0.809124428  | 1.55006E-19 | 7.8503E-18  | UP     | T-cell receptor beta variable 9 [Source:HGNC Symbol;Acc:HGNC:12246]                            | chr7  | 142391891 | 142392412 | 390   |
| ACSM6      | -1.376255854 | 1.69144E-19 | 8.51875E-18 | DOWN   | acyl-CoA synthetase medium chain family member 6 [Source:HGNC Symbol;Acc:HGNC:31665]           | chr10 | 95194200  | 95228928  | 1712  |
| ATP1A4     | -1.094610471 | 1.78754E-19 | 8.97779E-18 | DOWN   | ATPase Na+/K+ transporting subunit alpha 4 [Source:HGNC Symbol;Acc:HGNC:14073]                 | chr1  | 160151570 | 160186977 | 3947  |
| CNN1       | -0.929982024 | 1.80931E-19 | 9.06207E-18 | DOWN   | calponin 1 [Source:HGNC Symbol;Acc:HGNC:2155]                                                  | chr19 | 11538717  | 11550323  | 1908  |
| GPX2       | -1.622826102 | 2.25248E-19 | 1.12506E-17 | DOWN   | glutathione peroxidase 2 [Source:HGNC Symbol;Acc:HGNC:4554]                                    | chr14 | 64939153  | 64942905  | 1087  |
| AC010329.1 | -0.995503622 | 2.47576E-19 | 1.22981E-17 | DOWN   |                                                                                                | chr19 | 20746923  | 20755250  | 8328  |
| IL2RA      | 0.599611968  | 2.59852E-19 | 1.28726E-17 | UP     | interleukin 2 receptor subunit alpha [Source:HGNC Symbol;Acc:HGNC:6008]                        | chr10 | 6010689   | 6062325   | 3176  |
| PPP1R3C    | -0.812151831 | 2.69858E-19 | 1.33318E-17 | DOWN   | protein phosphatase 1 regulatory subunit 3C [Source:HGNC Symbol;Acc:HGNC:9293]                 | chr10 | 91628442  | 91633054  | 2524  |
| GPR174     | 0.676869728  | 2.77883E-19 | 1.3691E-17  | UP     | G protein-coupled receptor 174 [Source:HGNC Symbol;Acc:HGNC:30245]                             | chrX  | 79170972  | 79172229  | 1258  |
| BTBD16     | -1.286589161 | 2.84156E-19 | 1.39621E-17 | DOWN   | BTB domain containing 16 [Source:HGNC Symbol;Acc:HGNC:26340]                                   | chr10 | 122271306 | 122338162 | 1849  |
| CLDN4      | -0.864045465 | 2.84924E-19 | 1.39621E-17 | DOWN   | claudin 4 [Source:HGNC Symbol;Acc:HGNC:2046]                                                   | chr7  | 73827744  | 73832693  | 4196  |
| MYCL       | -0.867856378 | 3.1721E-19  | 1.54606E-17 | DOWN   | MYCL proto-oncogene, bHLH transcription factor [Source:HGNC Symbol;Acc:HGNC:7555]              | chr1  | 39895426  | 39902013  | 4947  |
| GSTM5      | -0.821801891 | 3.30654E-19 | 1.60296E-17 | DOWN   | glutathione S-transferase mu 5 [Source:HGNC Symbol;Acc:HGNC:4637]                              | chr1  | 109712255 | 109718266 | 4427  |
| ACTC1      | -1.335626492 | 3.41722E-19 | 1.64781E-17 | DOWN   | actin, alpha, cardiac muscle 1 [Source:HGNC Symbol;Acc:HGNC:143]                               | chr15 | 34788096  | 34796139  | 4106  |
| ELN        | -0.854568056 | 5.11179E-19 | 2.41989E-17 | DOWN   | elastin [Source:HGNC Symbol;Acc:HGNC:3327]                                                     | chr7  | 74027789  | 74069907  | 4000  |
| C1QTNF7    | -0.843826746 | 5.30655E-19 | 2.50555E-17 | DOWN   | C1q and TNF related 7 [Source:HGNC Symbol;Acc:HGNC:14342]                                      | chr4  | 15339936  | 15446166  | 5054  |

| PARAM      | logFC        | pval        | pval.adj    | UPDOWN | desc                                                                                                                      | chr   | start     | end       | size  |
|------------|--------------|-------------|-------------|--------|---------------------------------------------------------------------------------------------------------------------------|-------|-----------|-----------|-------|
| PLCE1      | -0.6427799   | 5.501E-19   | 2.59062E-17 | DOWN   | phospholipase C epsilon 1 [Source:HGNC Symbol;Acc:HGNC:17175]                                                             | chr10 | 94030812  | 94332823  | 12880 |
| SCNN1B     | -1.216171986 | 8.39324E-19 | 3.902E-17   | DOWN   | sodium channel epithelial 1 beta subunit [Source:HGNC Symbol;Acc:HGNC:10600]                                              | chr16 | 23302270  | 23381299  | 2751  |
| FBLN1      | -0.75082533  | 8.41747E-19 | 3.90325E-17 | DOWN   | fibulin 1 [Source:HGNC Symbol;Acc:HGNC:3600]                                                                              | chr22 | 45502883  | 45601135  | 4928  |
| KRT20      | -2.00150497  | 8.67134E-19 | 4.01071E-17 | DOWN   | keratin 20 [Source:HGNC Symbol;Acc:HGNC:20412]                                                                            | chr17 | 40875941  | 40885227  | 1737  |
| AC011487.2 | -1.54223532  | 9.371E-19   | 4.30141E-17 | DOWN   |                                                                                                                           | chr19 | 53599628  | 53608451  | 2047  |
| CST7       | 0.597445879  | 1.70029E-18 | 7.66866E-17 | UP     | cystatin F [Source:HGNC Symbol;Acc:HGNC:2479]                                                                             | chr20 | 24949230  | 24959928  | 930   |
| NAALADL2   | -0.660106171 | 1.70924E-18 | 7.68989E-17 | DOWN   | N-acetylated alpha-linked acidic dipeptidase like 2 [Source:HGNC Symbol;Acc:HGNC:23219]                                   | chr3  | 174859280 | 175810552 | 9865  |
| GDF7       | -0.972389777 | 2.14306E-18 | 9.59403E-17 | DOWN   | growth differentiation factor 7 [Source:HGNC Symbol;Acc:HGNC:4222]                                                        | chr2  | 20666664  | 20679245  | 9749  |
| SLC30A2    | -1.329782575 | 2.28828E-18 | 1.02189E-16 | DOWN   | solute carrier family 30 member 2 [Source:HGNC Symbol;Acc:HGNC:11013]                                                     | chr1  | 26037252  | 26046133  | 3264  |
| BCL2A1     | 0.730045589  | 2.35428E-18 | 1.04878E-16 | UP     | BCL2 related protein A1 [Source:HGNC Symbol;Acc:HGNC:991]                                                                 | chr15 | 79960889  | 79971446  | 1089  |
| TOMM20P2   | 0.744649885  | 4.01933E-18 | 1.73925E-16 | UP     | TOMM20 pseudogene 2 [Source:HGNC Symbol;Acc:HGNC:50519]                                                                   | chr17 | 35514766  | 35515186  | 421   |
| LMOD1      | -0.791540131 | 4.10142E-18 | 1.77054E-16 | DOWN   | leiomodin 1 [Source:HGNC Symbol;Acc:HGNC:6647]                                                                            | chr1  | 201896452 | 201946588 | 3971  |
| AL136982.1 | -0.877069546 | 4.11847E-18 | 1.77335E-16 | DOWN   |                                                                                                                           | chr10 | 86992406  | 87010203  | 4560  |
| TMPPRS2    | -1.193678558 | 4.41409E-18 | 1.89201E-16 | DOWN   | transmembrane protease, serine 2 [Source:HGNC Symbol;Acc:HGNC:11876]                                                      | chr21 | 41464551  | 41508159  | 3321  |
| MEFV       | 0.667706517  | 4.52944E-18 | 1.93305E-16 | UP     | MEFV, pyrin innate immunity regulator [Source:HGNC Symbol;Acc:HGNC:6998]                                                  | chr16 | 3242028   | 3256627   | 3767  |
| TRGV2      | 0.940098557  | 4.53117E-18 | 1.93305E-16 | UP     | T-cell receptor gamma variable 2 [Source:HGNC Symbol;Acc:HGNC:12287]                                                      | chr7  | 38362864  | 38363518  | 544   |
| ANKRD35    | -0.686473798 | 5.77899E-18 | 2.43672E-16 | DOWN   | ankyrin repeat domain 35 [Source:HGNC Symbol;Acc:HGNC:26323]                                                              | chr1  | 145866560 | 145885866 | 3363  |
| GATA2      | -0.688433866 | 6.6035E-18  | 2.75237E-16 | DOWN   | GATA binding protein 2 [Source:HGNC Symbol;Acc:HGNC:4171]                                                                 | chr3  | 128479427 | 128493185 | 3757  |
| AP000892.3 | -0.72971561  | 6.87251E-18 | 2.85573E-16 | DOWN   |                                                                                                                           | chr11 | 117204967 | 117210292 | 5326  |
| IGDCC3     | -1.098815909 | 6.88297E-18 | 2.85573E-16 | DOWN   | immunoglobulin superfamily DCC subclass member 3 [Source:HGNC Symbol;Acc:HGNC:9700]                                       | chr15 | 65327127  | 65378040  | 4479  |
| FCER1A     | -0.932144845 | 7.12666E-18 | 2.95008E-16 | DOWN   | Fc fragment of IgE receptor Ia [Source:HGNC Symbol;Acc:HGNC:3609]                                                         | chr1  | 159289714 | 159308224 | 1165  |
| MYOCD      | -0.827519615 | 8.94169E-18 | 3.67623E-16 | DOWN   | myocardin [Source:HGNC Symbol;Acc:HGNC:16067]                                                                             | chr17 | 12665989  | 12768949  | 8466  |
| MAPK10     | -0.654017302 | 9.8582E-18  | 4.02565E-16 | DOWN   | mitogen-activated protein kinase 10 [Source:HGNC Symbol;Acc:HGNC:6872]                                                    | chr4  | 85990007  | 86594625  | 22619 |
| GRHL1      | -0.79094557  | 1.03937E-17 | 4.20645E-16 | DOWN   | grainyhead like transcription factor 1 [Source:HGNC Symbol;Acc:HGNC:17923]                                                | chr2  | 9951698   | 10002277  | 3618  |
| SEMA5A     | -0.668040072 | 1.26167E-17 | 5.07214E-16 | DOWN   | semaphorin 5A [Source:HGNC Symbol;Acc:HGNC:10736]                                                                         | chr5  | 9035026   | 9546075   | 11762 |
| EVPL       | -0.881490843 | 1.27628E-17 | 5.1195E-16  | DOWN   | envoplakin [Source:HGNC Symbol;Acc:HGNC:3503]                                                                             | chr17 | 76006845  | 76027452  | 6680  |
| NIPAL4     | -1.047492371 | 1.80935E-17 | 7.19415E-16 | DOWN   | NIPA like domain containing 4 [Source:HGNC Symbol;Acc:HGNC:28018]                                                         | chr5  | 157460019 | 157474717 | 3274  |
| FLRT3      | -0.941680405 | 1.88684E-17 | 7.48583E-16 | DOWN   | fibronectin leucine rich transmembrane protein 3 [Source:HGNC Symbol;Acc:HGNC:3762]                                       | chr20 | 14322988  | 14337616  | 4978  |
| CNTN4      | -0.651091554 | 1.95345E-17 | 7.73318E-16 | DOWN   | contactin 4 [Source:HGNC Symbol;Acc:HGNC:2174]                                                                            | chr3  | 2098926   | 3057956   | 5457  |
| AL365436.1 | -0.67293115  | 2.34802E-17 | 9.23471E-16 | DOWN   |                                                                                                                           | chr1  | 151557446 | 151557940 | 495   |
| DAB1       | -1.076701031 | 2.53918E-17 | 9.94337E-16 | DOWN   | DAB1, reelin adaptor protein [Source:HGNC Symbol;Acc:HGNC:2661]                                                           | chr1  | 56994778  | 57424057  | 5688  |
| GNMT2      | 0.60777955   | 2.92982E-17 | 1.13993E-15 | UP     | G protein subunit gamma transducin 2 [Source:HGNC Symbol;Acc:HGNC:4412]                                                   | chr17 | 49202791  | 49210574  | 1689  |
| SLC2A5     | 0.641689844  | 3.6547E-17  | 1.41588E-15 | UP     | solute carrier family 2 member 5 [Source:HGNC Symbol;Acc:HGNC:11010]                                                      | chr9  | 9035107   | 9069716   | 5760  |
| C1orf116   | -0.983838637 | 3.7227E-17  | 1.43915E-15 | DOWN   | chromosome 1 open reading frame 116 [Source:HGNC Symbol;Acc:HGNC:28667]                                                   | chr1  | 207018521 | 207032756 | 5502  |
| GPC3       | -0.877204451 | 3.98914E-17 | 1.53235E-15 | DOWN   | glypican 3 [Source:HGNC Symbol;Acc:HGNC:4451]                                                                             | chrX  | 133535745 | 133985895 | 2637  |
| TNFSF10    | 0.595126877  | 4.27672E-17 | 1.63589E-15 | UP     | TNF superfamily member 10 [Source:HGNC Symbol;Acc:HGNC:11925]                                                             | chr3  | 172505508 | 172523507 | 1953  |
| ADAM3B     | -0.665521288 | 4.34573E-17 | 1.65879E-15 | DOWN   | ADAM metalloproteinase domain 3B (pseudogene) [Source:HGNC Symbol;Acc:HGNC:210]                                           | chr16 | 49517762  | 49518601  | 840   |
| TRAV14DV4  | 0.75508319   | 4.99311E-17 | 1.90189E-15 | UP     | T-cell receptor alpha variable 14/delta variable 4 [Source:HGNC Symbol;Acc:HGNC:12110]                                    | chr14 | 21924063  | 21924651  | 425   |
| BIRC3      | 0.618133964  | 5.1751E-17  | 1.96708E-15 | UP     | baculoviral IAP repeat containing 3 [Source:HGNC Symbol;Acc:HGNC:591]                                                     | chr11 | 102317450 | 102339403 | 6911  |
| KIR3DL2    | 0.905349366  | 6.05697E-17 | 2.2784E-15  | UP     | killer cell immunoglobulin like receptor, three Ig domains and long cytoplasmic tail 2 [Source:HGNC Symbol;Acc:HGNC:6339] | chr19 | 54850443  | 54867207  | 1877  |
| SMIM5      | -0.734165852 | 6.22806E-17 | 2.33791E-15 | DOWN   | small integral membrane protein 5 [Source:HGNC Symbol;Acc:HGNC:40030]                                                     | chr17 | 75633434  | 75641404  | 5117  |
| FAM84A     | -0.831017125 | 6.24622E-17 | 2.33988E-15 | DOWN   | family with sequence similarity 84 member A [Source:HGNC Symbol;Acc:HGNC:20743]                                           | chr2  | 14632686  | 14640046  | 6598  |
| SOWAHB     | -0.783810814 | 6.5061E-17  | 2.4272E-15  | DOWN   | soyondawah ankyrin repeat domain family member B [Source:HGNC Symbol;Acc:HGNC:32958]                                      | chr4  | 76894928  | 76898147  | 3220  |
| BAMBI      | -0.786204768 | 8.92811E-17 | 3.29685E-15 | DOWN   | BMP and activin membrane bound inhibitor [Source:HGNC Symbol;Acc:HGNC:30251]                                              | chr10 | 28677342  | 28682939  | 1877  |
| CMYA5      | -0.694703531 | 9.22485E-17 | 3.39951E-15 | DOWN   | cardiomyopathy associated 5 [Source:HGNC Symbol;Acc:HGNC:14305]                                                           | chr5  | 79689877  | 79800222  | 12847 |
| FOXO6      | -0.836552005 | 1.00683E-16 | 3.70281E-15 | DOWN   | forkhead box O6 [Source:HGNC Symbol;Acc:HGNC:24814]                                                                       | chr1  | 41361931  | 41382678  | 1476  |
| POF1B      | -1.131676703 | 1.01397E-16 | 3.72153E-15 | DOWN   | premature ovarian failure, 1B [Source:HGNC Symbol;Acc:HGNC:13711]                                                         | chrX  | 85277396  | 85379743  | 4029  |
| CYP4F22    | -1.213082348 | 1.05963E-16 | 3.86564E-15 | DOWN   | cytochrome P450 family 4 subfamily F member 22 [Source:HGNC Symbol;Acc:HGNC:26820]                                        | chr19 | 15508493  | 15552317  | 2644  |
| AC245427.1 | 0.619496607  | 1.1366E-16  | 4.12154E-15 | UP     |                                                                                                                           | chr7  | 142791694 | 142793368 | 760   |
| DACT3      | -0.665996552 | 1.14042E-16 | 4.12713E-15 | DOWN   | dishevelled binding antagonist of beta catenin 3 [Source:HGNC Symbol;Acc:HGNC:30745]                                      | chr19 | 46647612  | 46661138  | 5361  |
| TMEM97     | -0.670407811 | 1.1544E-16  | 4.1694E-15  | DOWN   | transmembrane protein 97 [Source:HGNC Symbol;Acc:HGNC:28106]                                                              | chr17 | 28319095  | 28328685  | 3034  |
| NECTIN4    | -0.994517443 | 1.33425E-16 | 4.80939E-15 | DOWN   | nectin cell adhesion molecule 4 [Source:HGNC Symbol;Acc:HGNC:19688]                                                       | chr1  | 161070995 | 161089599 | 3502  |
| DEGS2      | -0.932796733 | 1.59979E-16 | 5.70199E-15 | DOWN   | delta 4-desaturase, sphingolipid 2 [Source:HGNC Symbol;Acc:HGNC:20113]                                                    | chr14 | 100143957 | 100160163 | 4352  |
| TCEAL7     | -0.680510414 | 1.60075E-16 | 5.70199E-15 | DOWN   | transcription elongation factor A like 7 [Source:HGNC Symbol;Acc:HGNC:28336]                                              | chrX  | 103330196 | 103332326 | 1177  |
| ANAPC1P1   | 0.742985482  | 1.7142E-16  | 6.07035E-15 | UP     | anaphase promoting complex subunit 1 pseudogene 1 [Source:HGNC Symbol;Acc:HGNC:44150]                                     | chr2  | 86861825  | 86912978  | 2553  |
| NIPAL1     | -0.753733107 | 1.7683E-16  | 6.2497E-15  | DOWN   | NIPA like domain containing 1 [Source:HGNC Symbol;Acc:HGNC:27194]                                                         | chr4  | 48016774  | 48040173  | 5300  |



| PARAM      | logFC        | pval        | pval.adj    | UPDOWN | desc                                                                                                                      | chr   | start     | end       | size  |
|------------|--------------|-------------|-------------|--------|---------------------------------------------------------------------------------------------------------------------------|-------|-----------|-----------|-------|
| THEMIS     | 0.592494015  | 1.77498E-16 | 6.26114E-15 | UP     | thymocyte selection associated [Source:HGNC Symbol;Acc:HGNC:21569]                                                        | chr6  | 127708072 | 127918631 | 4309  |
| ALKAL1     | -0.963466943 | 2.12406E-16 | 7.47794E-15 | DOWN   | ALK and LTK ligand 1 [Source:HGNC Symbol;Acc:HGNC:33775]                                                                  | chr8  | 52534037  | 52565507  | 1217  |
| MFAP4      | -0.73415478  | 2.1294E-16  | 7.48221E-15 | DOWN   | microfibril associated protein 4 [Source:HGNC Symbol;Acc:HGNC:7035]                                                       | chr17 | 19383442  | 19387240  | 2076  |
| LTA        | 0.702506402  | 2.28931E-16 | 7.95162E-15 | UP     | lymphotoxin alpha [Source:HGNC Symbol;Acc:HGNC:6709]                                                                      | chr6  | 31572054  | 31574324  | 1651  |
| ADGRE1     | 0.637451095  | 2.4201E-16  | 8.37383E-15 | UP     | adhesion G protein-coupled receptor E1 [Source:HGNC Symbol;Acc:HGNC:3336]                                                 | chr19 | 6887566   | 6940459   | 3233  |
| GCNT4      | -0.65744081  | 2.4579E-16  | 8.4562E-15  | DOWN   | glucosaminyl (N-acetyl) transferase 4, core 2 [Source:HGNC Symbol;Acc:HGNC:17973]                                         | chr5  | 75025346  | 75030899  | 5554  |
| BAIAP3     | -0.727570573 | 2.6996E-16  | 9.25263E-15 | DOWN   | BAI1 associated protein 3 [Source:HGNC Symbol;Acc:HGNC:948]                                                               | chr16 | 1333601   | 1349441   | 5084  |
| OCLN       | -0.739547892 | 2.761E-16   | 9.42744E-15 | DOWN   | occludin [Source:HGNC Symbol;Acc:HGNC:8104]                                                                               | chr5  | 69492292  | 69558104  | 6549  |
| SCUBE3     | -0.851151073 | 2.99424E-16 | 1.01855E-14 | DOWN   | signal peptide, CUB domain and EGF like domain containing 3 [Source:HGNC Symbol;Acc:HGNC:13655]                           | chr6  | 35214419  | 35253079  | 7356  |
| DACH2      | -1.029043671 | 3.11137E-16 | 1.05444E-14 | DOWN   | dachshund family transcription factor 2 [Source:HGNC Symbol;Acc:HGNC:16814]                                               | chrX  | 86148458  | 86832602  | 2512  |
| OVOL1      | -0.932546351 | 3.21493E-16 | 1.0875E-14  | DOWN   | ovo like transcriptional repressor 1 [Source:HGNC Symbol;Acc:HGNC:8525]                                                   | chr11 | 65787022  | 65797219  | 3356  |
| PP14571    | -1.025132754 | 3.57394E-16 | 1.20445E-14 | DOWN   | uncharacterized LOC100130449 [Source:NCBI gene;Acc:100130449]                                                             | chr2  | 240449418 | 240456714 | 2032  |
| VGLL3      | -0.68207632  | 3.99625E-16 | 1.33436E-14 | DOWN   | vestigial like family member 3 [Source:HGNC Symbol;Acc:HGNC:24327]                                                        | chr3  | 86937969  | 86991119  | 11574 |
| CLDN11     | -0.714982465 | 4.23042E-16 | 1.40996E-14 | DOWN   | claudin 11 [Source:HGNC Symbol;Acc:HGNC:8514]                                                                             | chr3  | 170418865 | 170860380 | 2718  |
| GNA14      | -0.653467736 | 4.27981E-16 | 1.4238E-14  | DOWN   | G protein subunit alpha 14 [Source:HGNC Symbol;Acc:HGNC:4382]                                                             | chr9  | 77423079  | 77648307  | 2482  |
| SLC4A3     | -0.599369865 | 4.84355E-16 | 1.6084E-14  | DOWN   | solute carrier family 4 member 3 [Source:HGNC Symbol;Acc:HGNC:28689]                                                      | chr1  | 94820342  | 94895246  | 2499  |
| KIR3DL1    | 0.863755863  | 4.9958E-16  | 1.6529E-14  | UP     | killer cell immunoglobulin like receptor, three Ig domains and long cytoplasmic tail 1 [Source:HGNC Symbol;Acc:HGNC:6338] | chr19 | 54816468  | 54830778  | 1871  |
| FAT3       | -0.866720761 | 5.09104E-16 | 1.67829E-14 | DOWN   | FAT atypical cadherin 3 [Source:HGNC Symbol;Acc:HGNC:23112]                                                               | chr11 | 92352096  | 92896470  | 19144 |
| RAB39A     | 0.619354752  | 5.14645E-16 | 1.69347E-14 | UP     | RAB39A, member RAS oncogene family [Source:HGNC Symbol;Acc:HGNC:16521]                                                    | chr11 | 107928503 | 107963482 | 1830  |
| DRD1       | -0.981350965 | 5.72256E-16 | 1.87285E-14 | DOWN   | dopamine receptor D1 [Source:HGNC Symbol;Acc:HGNC:3020]                                                                   | chr5  | 175440039 | 175444208 | 4054  |
| GPRC5C     | -0.65984072  | 6.77425E-16 | 2.2051E-14  | DOWN   | G protein-coupled receptor class C group 5 member C [Source:HGNC Symbol;Acc:HGNC:13309]                                   | chr17 | 74430913  | 74447429  | 2049  |
| SAMD11     | -0.770630273 | 7.64662E-16 | 2.47573E-14 | DOWN   | sterile alpha motif domain containing 11 [Source:HGNC Symbol;Acc:HGNC:28706]                                              | chr1  | 925738    | 944581    | 3560  |
| SLC15A1    | -1.13474985  | 7.80478E-16 | 2.51794E-14 | DOWN   | solute carrier family 15 member 1 [Source:HGNC Symbol;Acc:HGNC:10920]                                                     | chr13 | 98683801  | 98752654  | 3106  |
| SMOC2      | -0.657111576 | 8.49268E-16 | 2.72051E-14 | DOWN   | SPARC related modular calcium binding 2 [Source:HGNC Symbol;Acc:HGNC:20323]                                               | chr6  | 168441151 | 168667994 | 3150  |
| DOK6       | -0.594538971 | 8.86978E-16 | 2.81382E-14 | DOWN   | docking protein 6 [Source:HGNC Symbol;Acc:HGNC:28301]                                                                     | chr18 | 69401055  | 69849087  | 8890  |
| SLC5A7     | -0.961413946 | 8.8771E-16  | 2.81382E-14 | DOWN   | solute carrier family 5 member 7 [Source:HGNC Symbol;Acc:HGNC:14025]                                                      | chr2  | 107986523 | 108013994 | 5168  |
| SNCG       | -0.877932548 | 9.24732E-16 | 2.92606E-14 | DOWN   | synuclein gamma [Source:HGNC Symbol;Acc:HGNC:11141]                                                                       | chr10 | 86958630  | 86963260  | 779   |
| NCF1B      | 0.662167818  | 9.55296E-16 | 3.01742E-14 | UP     | neutrophil cytosolic factor 1B pseudogene [Source:HGNC Symbol;Acc:HGNC:32522]                                             | chr7  | 73220624  | 73235945  | 1902  |
| GLI1       | -0.781814496 | 1.02258E-15 | 3.21324E-14 | DOWN   | GLI family zinc finger 1 [Source:HGNC Symbol;Acc:HGNC:4317]                                                               | chr12 | 57460135  | 57472262  | 3616  |
| CYP4F8     | -1.41098695  | 1.33539E-15 | 4.15299E-14 | DOWN   | cytochrome P450 family 4 subfamily F member 8 [Source:HGNC Symbol;Acc:HGNC:2648]                                          | chr19 | 15615221  | 15629623  | 1889  |
| FAM198A    | -0.672411781 | 1.35227E-15 | 4.19829E-14 | DOWN   | family with sequence similarity 198 member A [Source:HGNC Symbol;Acc:HGNC:24485]                                          | chr3  | 42979548  | 43057684  | 3121  |
| TMC4       | -0.648376625 | 1.68358E-15 | 5.18252E-14 | DOWN   | transmembrane channel like 4 [Source:HGNC Symbol;Acc:HGNC:22998]                                                          | chr19 | 54160108  | 54173250  | 2470  |
| CACNA1I    | -0.864070463 | 1.75543E-15 | 5.39452E-14 | DOWN   | calcium voltage-gated channel subunit alpha1 I [Source:HGNC Symbol;Acc:HGNC:1396]                                         | chr22 | 39570753  | 39689737  | 10717 |
| FOXA1      | -1.092376557 | 1.82187E-15 | 5.58922E-14 | DOWN   | forkhead box A1 [Source:HGNC Symbol;Acc:HGNC:5021]                                                                        | chr14 | 37589984  | 37595034  | 2862  |
| TMEM132E   | -0.782534027 | 1.91521E-15 | 5.82629E-14 | DOWN   | transmembrane protein 132E [Source:HGNC Symbol;Acc:HGNC:26991]                                                            | chr17 | 34579487  | 34639318  | 5901  |
| CLEC4E     | 0.708846277  | 1.92276E-15 | 5.83945E-14 | UP     | C-type lectin domain family 4 member E [Source:HGNC Symbol;Acc:HGNC:14555]                                                | chr12 | 8533305   | 8540963   | 2234  |
| MFAP3L     | -0.641681427 | 1.97968E-15 | 5.99789E-14 | DOWN   | microfibril associated protein 3 like [Source:HGNC Symbol;Acc:HGNC:29083]                                                 | chr4  | 169986597 | 170032212 | 7658  |
| IGF2       | -1.203922189 | 1.98154E-15 | 5.99789E-14 | DOWN   | insulin like growth factor 2 [Source:HGNC Symbol;Acc:HGNC:5466]                                                           | chr11 | 2129112   | 2141238   | 6259  |
| SAMD13     | -0.724930287 | 2.5588E-15  | 7.64699E-14 | DOWN   | sterile alpha motif domain containing 13 [Source:HGNC Symbol;Acc:HGNC:24582]                                              | chr1  | 84298366  | 84350798  | 2171  |
| NCF1C      | 0.707436169  | 3.12643E-15 | 9.30793E-14 | UP     | neutrophil cytosolic factor 1C pseudogene [Source:HGNC Symbol;Acc:HGNC:32523]                                             | chr7  | 75156639  | 75172044  | 1427  |
| SYT16      | -0.959064199 | 3.52937E-15 | 1.0456E-13  | DOWN   | synaptotagmin 16 [Source:HGNC Symbol;Acc:HGNC:23142]                                                                      | chr14 | 61995823  | 62112550  | 14060 |
| WFDC1      | -0.597314297 | 4.42805E-15 | 1.28868E-13 | DOWN   | WAP four-disulfide core domain 1 [Source:HGNC Symbol;Acc:HGNC:15466]                                                      | chr16 | 84294646  | 84329851  | 1911  |
| ALG61277.1 | 0.645668341  | 4.74167E-15 | 1.3727E-13  | UP     |                                                                                                                           | chr6  | 29942075  | 29943067  | 993   |
| ANKRD65    | -0.811768583 | 4.9175E-15  | 1.41667E-13 | DOWN   | ankyrin repeat domain 65 [Source:HGNC Symbol;Acc:HGNC:42950]                                                              | chr1  | 1418420   | 1421769   | 2644  |
| TNF        | 0.675828265  | 4.9246E-15  | 1.41667E-13 | UP     | tumor necrosis factor [Source:HGNC Symbol;Acc:HGNC:11892]                                                                 | chr6  | 31575567  | 31578336  | 1676  |
| CD244      | 0.59073196   | 5.0033E-15  | 1.43309E-13 | UP     | CD244 molecule [Source:HGNC Symbol;Acc:HGNC:18171]                                                                        | chr1  | 160830160 | 160862855 | 2478  |
| IL20RA     | -0.857574549 | 6.24976E-15 | 1.76228E-13 | DOWN   | interleukin 20 receptor subunit alpha [Source:HGNC Symbol;Acc:HGNC:6003]                                                  | chr6  | 136999971 | 137045180 | 4351  |
| EVX1       | -0.918012376 | 7.56185E-15 | 2.10605E-13 | DOWN   | even-skipped homeobox 1 [Source:HGNC Symbol;Acc:HGNC:3506]                                                                | chr7  | 27242700  | 27247825  | 2955  |
| SLC14A1    | -1.031639781 | 7.88733E-15 | 2.19333E-13 | DOWN   | solute carrier family 14 member 1 (Kidd blood group) [Source:HGNC Symbol;Acc:HGNC:10918]                                  | chr18 | 45724127  | 45752520  | 5936  |
| ZBP1       | 0.629580688  | 8.06898E-15 | 2.24041E-13 | UP     | Z-DNA binding protein 1 [Source:HGNC Symbol;Acc:HGNC:16176]                                                               | chr20 | 57603846  | 57620576  | 2570  |
| RAB25      | -0.889092223 | 8.24674E-15 | 2.28626E-13 | DOWN   | RAB25, member RAS oncogene family [Source:HGNC Symbol;Acc:HGNC:18238]                                                     | chr1  | 156061160 | 156070514 | 1110  |
| CARD17     | 0.792744725  | 9.55677E-15 | 2.63735E-13 | UP     | caspace recruitment domain family member 17 [Source:HGNC Symbol;Acc:HGNC:33827]                                           | chr11 | 105092469 | 105101431 | 466   |
| CPZ        | -0.622948662 | 9.86688E-15 | 2.71467E-13 | DOWN   | carboxypeptidase Z [Source:HGNC Symbol;Acc:HGNC:2333]                                                                     | chr4  | 8592660   | 8619759   | 2538  |
| PGM5       | -0.784301273 | 1.14267E-14 | 3.12486E-13 | DOWN   | phosphoglucomutase 5 [Source:HGNC Symbol;Acc:HGNC:8908]                                                                   | chr9  | 68356899  | 68531061  | 3732  |
| RASL11B    | -0.707719703 | 1.16966E-14 | 3.18905E-13 | DOWN   | RAS like family 11 member B [Source:HGNC Symbol;Acc:HGNC:23804]                                                           | chr4  | 52862290  | 52866835  | 1995  |
| AMIGO2     | -0.624703886 | 1.25148E-14 | 3.3968E-13  | DOWN   | adhesion molecule with Ig like domain 2 [Source:HGNC Symbol;Acc:HGNC:24073]                                               | chr12 | 47075707  | 47079951  | 3956  |

| PARAM      | logFC        | pval        | pval.adj    | UPDOWN | desc                                                                                              | chr   | start     | end       | size  |
|------------|--------------|-------------|-------------|--------|---------------------------------------------------------------------------------------------------|-------|-----------|-----------|-------|
| OMP        | -0.743920928 | 1.2645E-14  | 3.42701E-13 | DOWN   | olfactory marker protein [Source:HGNC Symbol;Acc:HGNC:8136]                                       | chr11 | 77102840  | 77103331  | 492   |
| ATP1A2     | -0.919453224 | 1.26982E-14 | 3.4363E-13  | DOWN   | ATPase Na+/K+ transporting subunit alpha 2 [Source:HGNC Symbol;Acc:HGNC:800]                      | chr1  | 160115773 | 160143591 | 5421  |
| AC008040.2 | -0.759240209 | 1.44927E-14 | 3.90442E-13 | DOWN   |                                                                                                   | chr3  | 170062244 | 170062951 | 708   |
| TRAV19     | 0.66543813   | 1.47994E-14 | 3.97523E-13 | UP     | T-cell receptor alpha variable 19 [Source:HGNC Symbol;Acc:HGNC:12115]                             | chr14 | 22007512  | 22008181  | 467   |
| SBSPON     | -0.906472628 | 1.50174E-14 | 4.02782E-13 | DOWN   | tomatomedin B and thrombospondin type 1 domain containing [Source:HGNC Symbol;Acc:HGNC:30362]     | chr8  | 73064540  | 73093272  | 3801  |
| HS3ST5     | -1.038922436 | 1.75304E-14 | 4.64683E-13 | DOWN   | heparan sulfate-glucosamine 3-sulfotransferase 5 [Source:HGNC Symbol;Acc:HGNC:19419]              | chr6  | 114055586 | 114343045 | 3901  |
| EPHA7      | -0.903086096 | 1.84864E-14 | 4.86468E-13 | DOWN   | EPH receptor A7 [Source:HGNC Symbol;Acc:HGNC:3390]                                                | chr6  | 93240020  | 93419547  | 7456  |
| TMC7       | -0.608383098 | 2.02816E-14 | 5.30812E-13 | DOWN   | transmembrane channel like 7 [Source:HGNC Symbol;Acc:HGNC:23000]                                  | chr16 | 18983934  | 19063942  | 5198  |
| ARHGAP40   | -0.993996863 | 2.02886E-14 | 5.30812E-13 | DOWN   | Rho GTPase activating protein 40 [Source:HGNC Symbol;Acc:HGNC:16226]                              | chr20 | 38601934  | 38650652  | 2841  |
| ZBTB8B     | -0.908429086 | 2.05492E-14 | 5.36855E-13 | DOWN   | zinc finger and BTB domain containing 8B [Source:HGNC Symbol;Acc:HGNC:37057]                      | chr1  | 32465069  | 32496686  | 12834 |
| MUM11      | -0.904415233 | 2.08466E-14 | 5.43767E-13 | DOWN   | MUM1 like 1 [Source:HGNC Symbol;Acc:HGNC:26583]                                                   | chrX  | 106168305 | 106208956 | 4343  |
| AKR1C2     | -1.236488545 | 2.15885E-14 | 5.61579E-13 | DOWN   | aldo-keto reductase family 1 member C2 [Source:HGNC Symbol;Acc:HGNC:385]                          | chr10 | 4987400   | 5004023   | 4306  |
| ERICH5     | -0.906075662 | 2.20532E-14 | 5.72312E-13 | DOWN   | glutamate rich 5 [Source:HGNC Symbol;Acc:HGNC:26823]                                              | chr8  | 98064311  | 98093610  | 1761  |
| REEP6      | -0.740037482 | 2.29641E-14 | 5.93955E-13 | DOWN   | receptor accessory protein 6 [Source:HGNC Symbol;Acc:HGNC:30078]                                  | chr19 | 1490747   | 1497927   | 1794  |
| UNC13C     | -1.30902623  | 2.36247E-14 | 6.10171E-13 | DOWN   | unc-13 homolog C [Source:HGNC Symbol;Acc:HGNC:23149]                                              | chr15 | 54012904  | 54633414  | 13049 |
| PM20D1     | -1.429437505 | 2.60842E-14 | 6.67041E-13 | DOWN   | peptidase M20 domain containing 1 [Source:HGNC Symbol;Acc:HGNC:26518]                             | chr1  | 205828022 | 205850117 | 2152  |
| LYZ        | 0.607989909  | 2.86444E-14 | 7.30453E-13 | UP     | lysozyme [Source:HGNC Symbol;Acc:HGNC:6740]                                                       | chr12 | 69348341  | 69354234  | 1764  |
| SCNN1G     | -1.096418634 | 2.89705E-14 | 7.3773E-13  | DOWN   | sodium channel epithelial 1 gamma subunit [Source:HGNC Symbol;Acc:HGNC:10602]                     | chr16 | 23182715  | 23216883  | 3507  |
| PRR36      | -1.033587948 | 3.09977E-14 | 7.86041E-13 | DOWN   | proline rich 36 [Source:HGNC Symbol;Acc:HGNC:26172]                                               | chr19 | 7868719   | 7874379   | 4456  |
| PLS1       | -0.628354338 | 3.13146E-14 | 7.91863E-13 | DOWN   | plastin 1 [Source:HGNC Symbol;Acc:HGNC:9090]                                                      | chr3  | 142596387 | 142713664 | 4167  |
| TRBV6-5    | 0.759568844  | 3.54847E-14 | 8.91098E-13 | UP     | T-cell receptor beta variable 6-5 [Source:HGNC Symbol;Acc:HGNC:12230]                             | chr7  | 142450947 | 142451448 | 410   |
| CPAMD8     | -0.982063703 | 3.57706E-14 | 8.97036E-13 | DOWN   | C3 and P2P like, alpha-2-macroglobulin domain containing 8 [Source:HGNC Symbol;Acc:HGNC:23228]    | chr19 | 16892947  | 17026815  | 6002  |
| GZMK       | 0.624058642  | 3.89286E-14 | 9.69525E-13 | UP     | granzyme K [Source:HGNC Symbol;Acc:HGNC:4711]                                                     | chr5  | 55024253  | 55034570  | 1509  |
| SHANK2     | -0.692414723 | 4.31486E-14 | 1.07315E-12 | DOWN   | SH3 and multiple ankyrin repeat domains 2 [Source:HGNC Symbol;Acc:HGNC:14295]                     | chr11 | 70467856  | 71224762  | 12411 |
| SH2D1A     | 0.590368658  | 4.36459E-14 | 1.08255E-12 | UP     | SH2 domain containing 1A [Source:HGNC Symbol;Acc:HGNC:10820]                                      | chrX  | 124346344 | 124373155 | 2450  |
| ST6GAL2    | -0.796923805 | 4.50233E-14 | 1.11215E-12 | DOWN   | ST6 beta-galactoside alpha-2,6-sialyltransferase 2 [Source:HGNC Symbol;Acc:HGNC:10861]            | chr2  | 106801600 | 106887108 | 7561  |
| FXYP4      | -1.187814959 | 4.84756E-14 | 1.19417E-12 | DOWN   | FXYP domain containing ion transport regulator 4 [Source:HGNC Symbol;Acc:HGNC:4028]               | chr10 | 43371642  | 43376335  | 826   |
| CRYBG2     | -0.804902625 | 5.08532E-14 | 1.25104E-12 | DOWN   | crystallin beta-gamma domain containing 2 [Source:HGNC Symbol;Acc:HGNC:17295]                     | chr1  | 26321859  | 26354130  | 5245  |
| AC139769.1 | -0.748843784 | 5.13229E-14 | 1.26089E-12 | DOWN   |                                                                                                   | chr19 | 23762944  | 23833314  | 2122  |
| DGAT2      | -0.65029638  | 5.24955E-14 | 1.28795E-12 | DOWN   | diacylglycerol O-acyltransferase 2 [Source:HGNC Symbol;Acc:HGNC:16940]                            | chr11 | 75768732  | 75801535  | 2454  |
| TRAV12-2   | 0.657358608  | 5.27421E-14 | 1.29122E-12 | UP     | T-cell receptor alpha variable 12-2 [Source:HGNC Symbol;Acc:HGNC:12106]                           | chr14 | 21887857  | 21888502  | 445   |
| CCL4L2     | 0.75295085   | 5.27711E-14 | 1.29122E-12 | UP     | C-C motif chemokine ligand 4 like 2 [Source:HGNC Symbol;Acc:HGNC:24066]                           | chr17 | 36210924  | 36212878  | 1397  |
| FAM3B      | -1.041370703 | 5.29181E-14 | 1.29307E-12 | DOWN   | family with sequence similarity 3 member B [Source:HGNC Symbol;Acc:HGNC:1253]                     | chr21 | 41316734  | 41357431  | 1308  |
| B3GNT3     | -0.897514989 | 6.74139E-14 | 1.63625E-12 | DOWN   | UDP-GlcNAc:betaGal beta-1,3-N-acetylglucosaminyltransferase 3 [Source:HGNC Symbol;Acc:HGNC:13528] | chr19 | 17795110  | 17813082  | 2245  |
| C10orf99   | -1.321449802 | 7.11544E-14 | 1.72243E-12 | DOWN   | chromosome 10 open reading frame 99 [Source:HGNC Symbol;Acc:HGNC:31428]                           | chr10 | 84173738  | 84185294  | 888   |
| ADAM33     | -0.694005266 | 8.55718E-14 | 2.05497E-12 | DOWN   | ADAM metalloproteinase domain 33 [Source:HGNC Symbol;Acc:HGNC:15478]                              | chr20 | 3667970   | 3682246   | 4125  |
| SDC1       | -0.604457175 | 9.22625E-14 | 2.20688E-12 | DOWN   | syndecan 1 [Source:HGNC Symbol;Acc:HGNC:10658]                                                    | chr2  | 20200797  | 20225433  | 3319  |
| GSTM3      | -0.735092202 | 1.1439E-13  | 2.71112E-12 | DOWN   | glutathione S-transferase mu 3 [Source:HGNC Symbol;Acc:HGNC:4635]                                 | chr1  | 109733932 | 109741038 | 4216  |
| FGFR3      | -0.912757476 | 1.15241E-13 | 2.7275E-12  | DOWN   | fibroblast growth factor receptor 3 [Source:HGNC Symbol;Acc:HGNC:3690]                            | chr4  | 1793307   | 1808872   | 4446  |
| SMIM22     | -0.974427845 | 1.24156E-13 | 2.90837E-12 | DOWN   | small integral membrane protein 22 [Source:HGNC Symbol;Acc:HGNC:48329]                            | chr16 | 4788397   | 4796491   | 1295  |
| PSD        | -0.596491062 | 1.30496E-13 | 3.05292E-12 | DOWN   | pleckstrin and Sec7 domain containing [Source:HGNC Symbol;Acc:HGNC:9507]                          | chr10 | 102402617 | 102419934 | 4318  |
| PTPRR      | -1.177155    | 1.33318E-13 | 3.11093E-12 | DOWN   | protein tyrosine phosphatase, receptor type R [Source:HGNC Symbol;Acc:HGNC:9680]                  | chr12 | 70638073  | 70920843  | 4163  |
| MAOA       | -0.686472691 | 1.36454E-13 | 3.18002E-12 | DOWN   | monoamine oxidase A [Source:HGNC Symbol;Acc:HGNC:6833]                                            | chrX  | 43654907  | 43746824  | 5438  |
| COL4A6     | -0.842587251 | 1.48848E-13 | 3.44669E-12 | DOWN   | collagen type IV alpha 6 chain [Source:HGNC Symbol;Acc:HGNC:2208]                                 | chrX  | 108155607 | 108439472 | 6866  |
| FUT9       | -1.007126105 | 1.51835E-13 | 3.51139E-12 | DOWN   | fucosyltransferase 9 [Source:HGNC Symbol;Acc:HGNC:4020]                                           | chr6  | 96015984  | 96215612  | 12783 |
| HLA-DRB5   | 0.634423998  | 1.5283E-13  | 3.5299E-12  | UP     | major histocompatibility complex, class II, DR beta 5 [Source:HGNC Symbol;Acc:HGNC:4953]          | chr6  | 32517343  | 32530287  | 1260  |
| ANXA9      | -0.862635886 | 1.59548E-13 | 3.66173E-12 | DOWN   | annexin A9 [Source:HGNC Symbol;Acc:HGNC:547]                                                      | chr1  | 150982017 | 150995634 | 1826  |
| CASQ1      | -0.937127812 | 1.59974E-13 | 3.66685E-12 | DOWN   | calsequestrin 1 [Source:HGNC Symbol;Acc:HGNC:1512]                                                | chr1  | 160190556 | 160201886 | 2012  |
| RGL3       | -0.765557982 | 1.61995E-13 | 3.70792E-12 | DOWN   | ral guanine nucleotide dissociation stimulator like 3 [Source:HGNC Symbol;Acc:HGNC:30282]         | chr19 | 11394057  | 11419342  | 2560  |
| PPL        | -0.61470038  | 1.63507E-13 | 3.73369E-12 | DOWN   | periplakin [Source:HGNC Symbol;Acc:HGNC:9273]                                                     | chr16 | 4882507   | 4937135   | 6238  |
| SCN5A      | -0.798387446 | 1.69262E-13 | 3.86024E-12 | DOWN   | sodium voltage-gated channel alpha subunit 5 [Source:HGNC Symbol;Acc:HGNC:10593]                  | chr3  | 38548057  | 38649673  | 8667  |
| STMN2      | -1.098098112 | 1.77404E-13 | 4.02065E-12 | DOWN   | stathmin 2 [Source:HGNC Symbol;Acc:HGNC:10577]                                                    | chr8  | 79610814  | 79666175  | 2362  |
| TEX45      | -0.76396713  | 1.90782E-13 | 4.29605E-12 | DOWN   | testis expressed 45 [Source:HGNC Symbol;Acc:HGNC:24745]                                           | chr19 | 7497559   | 7508450   | 1679  |
| IVL        | -1.252417301 | 1.90978E-13 | 4.29605E-12 | DOWN   | involutrin [Source:HGNC Symbol;Acc:HGNC:6187]                                                     | chr1  | 152908545 | 152911886 | 2153  |
| PLIN4      | -0.739695809 | 2.12403E-13 | 4.73105E-12 | DOWN   | perilipin 4 [Source:HGNC Symbol;Acc:HGNC:29393]                                                   | chr19 | 4502180   | 4518465   | 6502  |
| LIPH       | -0.915383303 | 2.6297E-13  | 5.77928E-12 | DOWN   | lipase H [Source:HGNC Symbol;Acc:HGNC:18483]                                                      | chr3  | 185506262 | 185552613 | 4026  |

| PARAM       | logFC        | pval        | pval.adj    | UPDOWN | desc                                                                                              | chr   | start     | end       | size  |
|-------------|--------------|-------------|-------------|--------|---------------------------------------------------------------------------------------------------|-------|-----------|-----------|-------|
| GSTM2       | -0.674295008 | 2.65345E-13 | 5.81737E-12 | DOWN   | glutathione S-transferase mu 2 [Source:HGNC Symbol;Acc:HGNC:4634]                                 | chr1  | 109668022 | 109709549 | 4201  |
| FREM1       | -0.735007575 | 2.69442E-13 | 5.90006E-12 | DOWN   | FRAS1 related extracellular matrix 1 [Source:HGNC Symbol;Acc:HGNC:23399]                          | chr9  | 14734666  | 14910995  | 10419 |
| TNNC1       | -0.914890555 | 2.78951E-13 | 6.10092E-12 | DOWN   | troponin C1, slow skeletal and cardiac type [Source:HGNC Symbol;Acc:HGNC:11943]                   | chr3  | 52451102  | 52454070  | 714   |
| TYH1        | -0.781979654 | 2.91414E-13 | 6.3429E-12  | DOWN   | tweety family member 1 [Source:HGNC Symbol;Acc:HGNC:13476]                                        | chr19 | 54415431  | 54436900  | 2088  |
| FOSB        | -0.876086568 | 3.16282E-13 | 6.84308E-12 | DOWN   | FosB proto-oncogene, AP-1 transcription factor subunit [Source:HGNC Symbol;Acc:HGNC:3797]         | chr19 | 45467995  | 45475179  | 5553  |
| RPS10P2     | -0.596637147 | 3.28601E-13 | 7.0927E-12  | DOWN   | ribosomal protein S10 pseudogene 2 [Source:HGNC Symbol;Acc:HGNC:16594]                            | chr20 | 14757563  | 14758056  | 494   |
| PRSS35      | -0.781032276 | 3.38403E-13 | 7.26965E-12 | DOWN   | protease, serine 35 [Source:HGNC Symbol;Acc:HGNC:21387]                                           | chr6  | 83512538  | 83525704  | 2440  |
| ATP2C2      | -0.980920271 | 3.44869E-13 | 7.39104E-12 | DOWN   | ATPase secretory pathway Ca2+ transporting 2 [Source:HGNC Symbol;Acc:HGNC:29103]                  | chr16 | 84368527  | 84464187  | 3472  |
| MYH14       | -0.752541573 | 3.46489E-13 | 7.41698E-12 | DOWN   | myosin heavy chain 14 [Source:HGNC Symbol;Acc:HGNC:23212]                                         | chr19 | 50188186  | 50310545  | 7035  |
| INMT-MINDY4 | -0.723655589 | 3.57954E-13 | 7.63538E-12 | DOWN   | INMT-MINDY4 readthrough (NMD candidate) [Source:HGNC Symbol;Acc:HGNC:41995]                       | chr7  | 30752137  | 30892081  | 2877  |
| PRELP       | -0.715402215 | 3.76507E-13 | 7.9935E-12  | DOWN   | proline and arginine rich end leucine rich repeat protein [Source:HGNC Symbol;Acc:HGNC:9357]      | chr1  | 203475828 | 203491352 | 5747  |
| KRT7        | -1.10567419  | 3.8526E-13  | 8.16022E-12 | DOWN   | keratin 7 [Source:HGNC Symbol;Acc:HGNC:6445]                                                      | chr12 | 52233114  | 52248921  | 1754  |
| TBX3        | -0.672504207 | 4.40558E-13 | 9.2773E-12  | DOWN   | T-box 3 [Source:HGNC Symbol;Acc:HGNC:11602]                                                       | chr12 | 114670254 | 114684164 | 4783  |
| AGR2        | -1.207861118 | 4.8579E-13  | 1.02061E-11 | DOWN   | anterior gradient 2, protein disulphide isomerase family member [Source:HGNC Symbol;Acc:HGNC:328] | chr7  | 16791811  | 16805080  | 2040  |
| WNT7B       | -0.753600601 | 5.05964E-13 | 1.06176E-11 | DOWN   | Wnt family member 7B [Source:HGNC Symbol;Acc:HGNC:12787]                                          | chr22 | 45920362  | 45977129  | 5051  |
| UGT1A2P     | -1.013634407 | 5.16017E-13 | 1.08161E-11 | DOWN   | UDP glucuronosyltransferase family 1 member A2, pseudogene [Source:HGNC Symbol;Acc:HGNC:12534]    | chr2  | 233747214 | 233748079 | 866   |
| OGN         | -1.021781646 | 5.34638E-13 | 1.11934E-11 | DOWN   | osteoglycin [Source:HGNC Symbol;Acc:HGNC:8126]                                                    | chr9  | 92383967  | 92404613  | 3025  |
| AL136982.6  | -0.730548411 | 6.41243E-13 | 1.33025E-11 | DOWN   |                                                                                                   | chr10 | 86993432  | 87024732  | 1238  |
| CNTN3       | -0.800093649 | 6.49029E-13 | 1.34486E-11 | DOWN   | contactin 3 [Source:HGNC Symbol;Acc:HGNC:2173]                                                    | chr3  | 74262568  | 74521140  | 4948  |
| MYH11       | -0.930338682 | 6.61433E-13 | 1.36588E-11 | DOWN   | myosin heavy chain 11 [Source:HGNC Symbol;Acc:HGNC:7569]                                          | chr16 | 15703172  | 15857033  | 6908  |
| CNTN1       | -0.826650617 | 6.63563E-13 | 1.36872E-11 | DOWN   | contactin 1 [Source:HGNC Symbol;Acc:HGNC:2171]                                                    | chr12 | 40692442  | 41072418  | 6915  |
| PAD13       | -1.135597254 | 6.71416E-13 | 1.38177E-11 | DOWN   | peptidyl arginine deiminase 3 [Source:HGNC Symbol;Acc:HGNC:18337]                                 | chr1  | 17249098  | 17284233  | 3189  |
| GOL11A      | -0.870234914 | 6.77615E-13 | 1.39295E-11 | DOWN   | golgi transport 1A [Source:HGNC Symbol;Acc:HGNC:24766]                                            | chr1  | 204198160 | 204214092 | 883   |
| TIFAB       | 0.647374537  | 6.83562E-13 | 1.40358E-11 | UP     | TIFA inhibitor [Source:HGNC Symbol;Acc:HGNC:34024]                                                | chr5  | 135444218 | 135452399 | 5923  |
| GDPD2       | -1.077561089 | 7.0646E-13  | 1.44733E-11 | DOWN   | glycerophosphodiester phosphodiesterase domain containing 2 [Source:HGNC Symbol;Acc:HGNC:25974]   | chrX  | 70423031  | 70433390  | 2438  |
| FER1L4      | -0.729307718 | 7.1334E-13  | 1.56959E-11 | DOWN   | fer-1 like family member 4, pseudogene [Source:HGNC Symbol;Acc:HGNC:15801]                        | chr20 | 35558737  | 35607562  | 7658  |
| GATA3       | -0.808974425 | 8.11817E-13 | 1.65012E-11 | DOWN   | GATA binding protein 3 [Source:HGNC Symbol;Acc:HGNC:4172]                                         | chr10 | 8054693   | 8075198   | 3078  |
| SLC26A5     | -0.998871008 | 8.98385E-13 | 1.81793E-11 | DOWN   | solute carrier family 26 member 5 [Source:HGNC Symbol;Acc:HGNC:9359]                              | chr7  | 103352730 | 103446177 | 2892  |
| CASQ2       | -0.879169943 | 9.77526E-13 | 1.96491E-11 | DOWN   | calsequestrin 2 [Source:HGNC Symbol;Acc:HGNC:1513]                                                | chr1  | 115700007 | 115768781 | 2674  |
| IL12A       | 0.589967997  | 9.98081E-13 | 2.00401E-11 | UP     | interleukin 12A [Source:HGNC Symbol;Acc:HGNC:5969]                                                | chr3  | 159988750 | 159996019 | 1529  |
| SRGIN1      | -0.687010203 | 1.00848E-12 | 2.02048E-11 | DOWN   | SRC kinase signaling inhibitor 1 [Source:HGNC Symbol;Acc:HGNC:29506]                              | chr17 | 38530016  | 38605930  | 7160  |
| FBXL22      | -0.637944123 | 1.05061E-12 | 2.09787E-11 | DOWN   | F-box and leucine rich repeat protein 22 [Source:HGNC Symbol;Acc:HGNC:27537]                      | chr15 | 63597353  | 63602428  | 3614  |
| PCDH19      | -0.697114384 | 1.07843E-12 | 2.14868E-11 | DOWN   | protocadherin 19 [Source:HGNC Symbol;Acc:HGNC:14270]                                              | chrX  | 100291644 | 100410273 | 9756  |
| UGT1A3      | -1.002629112 | 1.12404E-12 | 2.23466E-11 | DOWN   | UDP glucuronosyltransferase family 1 member A3 [Source:HGNC Symbol;Acc:HGNC:12535]                | chr2  | 233729108 | 233773299 | 2364  |
| MUC20       | -0.658317987 | 1.18122E-12 | 2.34318E-11 | DOWN   | mucin 20, cell surface associated [Source:HGNC Symbol;Acc:HGNC:23282]                             | chr3  | 195720882 | 195735033 | 3322  |
| CHRM2       | -0.858873857 | 1.18461E-12 | 2.34734E-11 | DOWN   | cholinergic receptor muscarinic 2 [Source:HGNC Symbol;Acc:HGNC:1951]                              | chr7  | 136868669 | 137020255 | 6163  |
| HNRNP66     | -0.615457783 | 1.19785E-12 | 2.36841E-11 | DOWN   | heterogeneous nuclear ribonucleoprotein C pseudogene 6 [Source:HGNC Symbol;Acc:HGNC:48817]        | chr11 | 85020785  | 85021655  | 871   |
| SGCA        | -0.741643746 | 1.24918E-12 | 2.46719E-11 | DOWN   | sarcoglycan alpha [Source:HGNC Symbol;Acc:HGNC:10805]                                             | chr17 | 50166005  | 50175931  | 1432  |
| SLC6A4      | -1.006941888 | 1.36941E-12 | 2.6871E-11  | DOWN   | solute carrier family 6 member 4 [Source:HGNC Symbol;Acc:HGNC:11050]                              | chr17 | 30194319  | 30236002  | 6640  |
| ESRP1       | -0.808387901 | 1.51287E-12 | 2.94945E-11 | DOWN   | epithelial splicing regulatory protein 1 [Source:HGNC Symbol;Acc:HGNC:25966]                      | chr8  | 94641074  | 94707466  | 3868  |
| ABCA8       | -0.730176145 | 1.59323E-12 | 3.10279E-11 | DOWN   | ATP binding cassette subfamily A member 8 [Source:HGNC Symbol;Acc:HGNC:38]                        | chr17 | 68867292  | 68955392  | 6125  |
| AC061965.1  | -0.64622948  | 1.68246E-12 | 3.26952E-11 | DOWN   |                                                                                                   | chr15 | 29233673  | 29235137  | 1465  |
| COL28A1     | -0.658335732 | 1.68758E-12 | 3.27597E-11 | DOWN   | collagen type XXVIII alpha 1 chain [Source:HGNC Symbol;Acc:HGNC:22442]                            | chr7  | 7357875   | 7358553   | 4277  |
| SNAP91      | -0.944036591 | 1.70304E-12 | 3.2989E-11  | DOWN   | synaptosome associated protein 91 [Source:HGNC Symbol;Acc:HGNC:14986]                             | chr6  | 83552880  | 83709691  | 5017  |
| PKIA        | -0.626046303 | 1.72551E-12 | 3.33175E-11 | DOWN   | cAMP-dependent protein kinase inhibitor alpha [Source:HGNC Symbol;Acc:HGNC:9017]                  | chr8  | 78516139  | 78605267  | 4216  |
| AP1M2       | -0.657859936 | 2.03363E-12 | 3.87307E-11 | DOWN   | adaptor related protein complex 1 mu 2 subunit [Source:HGNC Symbol;Acc:HGNC:558]                  | chr19 | 10572671  | 10587315  | 1757  |
| ESRP2       | -0.621784771 | 2.05843E-12 | 3.91209E-11 | DOWN   | epithelial splicing regulatory protein 2 [Source:HGNC Symbol;Acc:HGNC:26152]                      | chr16 | 68229111  | 68236584  | 3838  |
| IRF4        | 0.609606001  | 2.13789E-12 | 4.05038E-11 | UP     | interferon regulatory factor 4 [Source:HGNC Symbol;Acc:HGNC:6119]                                 | chr6  | 391739    | 411447    | 5331  |
| COL14A1     | -0.586492025 | 2.17829E-12 | 4.1206E-11  | DOWN   | collagen type XIV alpha 1 chain [Source:HGNC Symbol;Acc:HGNC:2191]                                | chr8  | 120107378 | 120372036 | 7781  |
| EVPLL       | -0.96223099  | 2.18277E-12 | 4.12248E-11 | DOWN   | envoplakin like [Source:HGNC Symbol;Acc:HGNC:35236]                                               | chr17 | 18377662  | 18389647  | 2095  |
| OVOL2       | -0.645817752 | 2.66156E-12 | 4.99036E-11 | DOWN   | ovo like zinc finger 2 [Source:HGNC Symbol;Acc:HGNC:15804]                                        | chr20 | 18024152  | 18057877  | 1555  |
| CYP2J2      | -0.711159016 | 2.67261E-12 | 5.00591E-11 | DOWN   | cytochrome P450 family 2 subfamily J member 2 [Source:HGNC Symbol;Acc:HGNC:2634]                  | chr1  | 59893308  | 59926790  | 1896  |
| KRBOX1      | -0.709889498 | 2.68899E-12 | 5.03138E-11 | DOWN   | KRAB box domain containing 1 [Source:HGNC Symbol;Acc:HGNC:38708]                                  | chr3  | 42809483  | 42942792  | 2910  |
| PDZRN4      | -0.825426268 | 2.85389E-12 | 5.32893E-11 | DOWN   | PDZ domain containing ring finger 4 [Source:HGNC Symbol;Acc:HGNC:30552]                           | chr12 | 41188448  | 41574582  | 4318  |
| HEATR9      | 0.635830524  | 3.00858E-12 | 5.57756E-11 | UP     | HEAT repeat containing 9 [Source:HGNC Symbol;Acc:HGNC:26548]                                      | chr17 | 35854951  | 35868891  | 1974  |
| HAS3        | -0.771970074 | 3.02523E-12 | 5.6027E-11  | DOWN   | hyaluronan synthase 3 [Source:HGNC Symbol;Acc:HGNC:4820]                                          | chr16 | 69105564  | 69118179  | 4869  |

| PARAM      | logFC        | pval        | pval.adj    | UPDOWN | desc                                                                                              | chr   | start     | end       | size  |
|------------|--------------|-------------|-------------|--------|---------------------------------------------------------------------------------------------------|-------|-----------|-----------|-------|
| FCGR1CP    | 0.702637248  | 3.12375E-12 | 5.76748E-11 | UP     | Fc fragment of IgG receptor 1c, pseudogene [Source:HGNC Symbol;Acc:HGNC:3615]                     | chr1  | 143874793 | 143883575 | 1127  |
| EEF1DP3    | -0.643007814 | 3.16206E-12 | 5.82636E-11 | DOWN   | eukaryotic translation elongation factor 1 delta pseudogene 3 [Source:HGNC Symbol;Acc:HGNC:30486] | chr13 | 31846841  | 31953472  | 1309  |
| LYPD6B     | -0.800181651 | 3.31318E-12 | 6.09241E-11 | DOWN   | LY6/PLAUR domain containing 6B [Source:HGNC Symbol;Acc:HGNC:27018]                                | chr2  | 149038467 | 149215262 | 1998  |
| HCAR1      | -0.868097816 | 3.60503E-12 | 6.60231E-11 | DOWN   | hydroxycarboxylic acid receptor 1 [Source:HGNC Symbol;Acc:HGNC:4532]                              | chr12 | 122726076 | 122730843 | 4768  |
| UGT1A4     | -1.001495396 | 3.66261E-12 | 6.68562E-11 | DOWN   | UDP glucuronosyltransferase family 1 member A4 [Source:HGNC Symbol;Acc:HGNC:12536]                | chr2  | 233718778 | 233773299 | 2388  |
| TMEM150B   | 0.594646746  | 3.66528E-12 | 6.68562E-11 | UP     | transmembrane protein 150B [Source:HGNC Symbol;Acc:HGNC:34415]                                    | chr19 | 55312801  | 55325301  | 943   |
| PLA2G2D    | 0.861369516  | 3.80353E-12 | 6.92387E-11 | UP     | phospholipase A2 group IID [Source:HGNC Symbol;Acc:HGNC:9033]                                     | chr1  | 20111939  | 20119566  | 2681  |
| TCF21      | -0.663470779 | 3.92536E-12 | 7.13133E-11 | DOWN   | transcription factor 21 [Source:HGNC Symbol;Acc:HGNC:11632]                                       | chr6  | 133889138 | 133895553 | 4551  |
| BNIP1      | -0.757129573 | 4.25484E-12 | 7.72218E-11 | DOWN   | BCL2 interacting protein like [Source:HGNC Symbol;Acc:HGNC:16976]                                 | chr1  | 151036570 | 151047600 | 2395  |
| LUZP2      | -0.893108319 | 4.44393E-12 | 8.04121E-11 | DOWN   | leucine zipper protein 2 [Source:HGNC Symbol;Acc:HGNC:23206]                                      | chr11 | 24497178  | 25082631  | 5109  |
| GLS2       | -0.705728468 | 4.57076E-12 | 8.24712E-11 | DOWN   | glutaminase 2 [Source:HGNC Symbol;Acc:HGNC:29570]                                                 | chr12 | 56470944  | 56488414  | 2719  |
| ITC6       | -0.830332294 | 4.96152E-12 | 8.91549E-11 | DOWN   | tetratricopeptide repeat domain 6 [Source:HGNC Symbol;Acc:HGNC:19739]                             | chr14 | 37622065  | 37842694  | 6252  |
| TRAV4      | 0.619311828  | 5.26837E-12 | 9.43881E-11 | UP     | T-cell receptor alpha variable 4 [Source:HGNC Symbol;Acc:HGNC:12140]                              | chr14 | 21736152  | 21736982  | 395   |
| FGF10      | -0.785921205 | 5.6968E-12  | 1.01662E-10 | DOWN   | fibroblast growth factor 10 [Source:HGNC Symbol;Acc:HGNC:3666]                                    | chr5  | 44303544  | 44388797  | 2193  |
| ANKRD19P   | -1.098926121 | 5.81728E-12 | 1.03608E-10 | DOWN   | ankyrin repeat domain 19, pseudogene [Source:HGNC Symbol;Acc:HGNC:22567]                          | chr9  | 92809388  | 92888693  | 2370  |
| TMEM35A    | -0.722540517 | 6.27356E-12 | 1.10972E-10 | DOWN   | transmembrane protein 35A [Source:HGNC Symbol;Acc:HGNC:25864]                                     | chrX  | 101078720 | 101096364 | 2195  |
| F10        | -0.72422991  | 6.40768E-12 | 1.13013E-10 | DOWN   | coagulation factor X [Source:HGNC Symbol;Acc:HGNC:3528]                                           | chr13 | 113122814 | 113149529 | 1521  |
| MGP        | -0.626939524 | 6.50641E-12 | 1.14643E-10 | DOWN   | matrix Gla protein [Source:HGNC Symbol;Acc:HGNC:7060]                                             | chr12 | 14881181  | 14885926  | 1480  |
| APOD       | -0.762548524 | 6.57873E-12 | 1.1576E-10  | DOWN   | apolipoprotein D [Source:HGNC Symbol;Acc:HGNC:612]                                                | chr3  | 195568702 | 195584205 | 1130  |
| UGT1A1     | -1.014497667 | 6.65695E-12 | 1.16955E-10 | DOWN   | UDP glucuronosyltransferase family 1 member A1 [Source:HGNC Symbol;Acc:HGNC:12530]                | chr2  | 233760248 | 233773299 | 4467  |
| CDH26      | -0.692581639 | 6.77352E-12 | 1.18887E-10 | DOWN   | cadherin 26 [Source:HGNC Symbol;Acc:HGNC:15902]                                                   | chr20 | 59958427  | 60014529  | 4823  |
| CCDC169    | -0.673169731 | 6.89053E-12 | 1.20824E-10 | DOWN   | coiled-coil domain containing 169 [Source:HGNC Symbol;Acc:HGNC:34361]                             | chr13 | 36222008  | 36297824  | 6542  |
| RIMKLA     | -0.755278414 | 6.92232E-12 | 1.21264E-10 | DOWN   | ribosomal modification protein rimk like family member A [Source:HGNC Symbol;Acc:HGNC:28725]      | chr1  | 42380806  | 42422578  | 8909  |
| NR4A1      | -0.640296465 | 6.9752E-12  | 1.21955E-10 | DOWN   | nuclear receptor subfamily 4 group A member 1 [Source:HGNC Symbol;Acc:HGNC:7980]                  | chr12 | 52022832  | 52059507  | 4053  |
| KRTAP5-9   | -0.839112756 | 7.0655E-12  | 1.23296E-10 | DOWN   | keratin associated protein 5-9 [Source:HGNC Symbol;Acc:HGNC:23604]                                | chr11 | 71548418  | 71549553  | 1136  |
| UGT1A6     | -1.009857901 | 7.51273E-12 | 1.30473E-10 | DOWN   | UDP glucuronosyltransferase family 1 member A6 [Source:HGNC Symbol;Acc:HGNC:12538]                | chr2  | 233691607 | 233773300 | 2864  |
| CYP4B1     | -0.979182307 | 7.75296E-12 | 1.3423E-10  | DOWN   | cytochrome P450 family 4 subfamily B member 1 [Source:HGNC Symbol;Acc:HGNC:2644]                  | chr1  | 46798998  | 46819413  | 2229  |
| TRGV8      | 0.656333444  | 7.76609E-12 | 1.3423E-10  | UP     | T-cell receptor gamma variable 8 [Source:HGNC Symbol;Acc:HGNC:12294]                              | chr7  | 38330343  | 38330935  | 468   |
| KCND2      | -0.618530715 | 8.42245E-12 | 1.44609E-10 | DOWN   | potassium voltage-gated channel subfamily D member 2 [Source:HGNC Symbol;Acc:HGNC:6238]           | chr7  | 120273668 | 120750331 | 5331  |
| NRK        | -0.731014331 | 8.85974E-12 | 1.51258E-10 | DOWN   | Nik related kinase [Source:HGNC Symbol;Acc:HGNC:25391]                                            | chrX  | 105822543 | 105958610 | 8510  |
| NEGR1      | -0.602495261 | 8.96773E-12 | 1.52958E-10 | DOWN   | neuronal growth regulator 1 [Source:HGNC Symbol;Acc:HGNC:17302]                                   | chr1  | 71395940  | 72282734  | 12997 |
| OR7E14P    | -0.624270899 | 8.98748E-12 | 1.5315E-10  | DOWN   | olfactory receptor family 7 subfamily E member 14 pseudogene [Source:HGNC Symbol;Acc:HGNC:8385]   | chr11 | 17013998  | 17053024  | 1370  |
| MS4A2      | -0.645432126 | 9.00778E-12 | 1.53236E-10 | DOWN   | membrane spanning 4-domains A2 [Source:HGNC Symbol;Acc:HGNC:7316]                                 | chr11 | 60088664  | 60098466  | 3647  |
| RG57BP     | -0.709169757 | 9.10833E-12 | 1.54628E-10 | DOWN   | regulator of G protein signaling 7 binding protein [Source:HGNC Symbol;Acc:HGNC:23271]            | chr5  | 64506299  | 64612312  | 4160  |
| ADRA2A     | -0.642594491 | 9.12547E-12 | 1.54774E-10 | DOWN   | adrenoceptor alpha 2A [Source:HGNC Symbol;Acc:HGNC:281]                                           | chr10 | 111077163 | 111080907 | 3745  |
| TRAV12-3   | 0.628968566  | 9.55392E-12 | 1.61287E-10 | UP     | T-cell receptor alpha variable 12-3 [Source:HGNC Symbol;Acc:HGNC:12107]                           | chr14 | 21965451  | 21966061  | 399   |
| IL20RB     | 0.814159033  | 9.77026E-12 | 1.64786E-10 | UP     | interleukin 20 receptor subunit beta [Source:HGNC Symbol;Acc:HGNC:6004]                           | chr3  | 136957865 | 137011085 | 2047  |
| AC245088.3 | 0.677277107  | 1.09063E-11 | 1.82587E-10 | UP     |                                                                                                   | chr7  | 142349152 | 142349664 | 424   |
| RG511      | -0.601236837 | 1.1223E-11  | 1.87371E-10 | DOWN   | regulator of G protein signaling 11 [Source:HGNC Symbol;Acc:HGNC:9993]                            | chr16 | 268301    | 275929    | 2420  |
| PHACTR3    | -0.809918742 | 1.13698E-11 | 1.89299E-10 | DOWN   | phosphatase and actin regulator 3 [Source:HGNC Symbol;Acc:HGNC:15833]                             | chr20 | 59577509  | 59847711  | 3378  |
| PCP4L1     | -0.905325197 | 1.17625E-11 | 1.95657E-10 | DOWN   | Purkinje cell protein 4 like 1 [Source:HGNC Symbol;Acc:HGNC:20448]                                | chr1  | 161258727 | 161285450 | 1424  |
| TRHDE      | -0.846917632 | 1.1897E-11  | 1.97713E-10 | DOWN   | thyrotropin releasing hormone degrading enzyme [Source:HGNC Symbol;Acc:HGNC:30748]                | chr12 | 72272683  | 72670757  | 10733 |
| PCP4       | -0.989260244 | 1.2444E-11  | 2.06048E-10 | DOWN   | Purkinje cell protein 4 [Source:HGNC Symbol;Acc:HGNC:8742]                                        | chr21 | 39867317  | 39929397  | 660   |
| UGT1A5     | -0.948997714 | 1.27433E-11 | 2.10811E-10 | DOWN   | UDP glucuronosyltransferase family 1 member A5 [Source:HGNC Symbol;Acc:HGNC:12537]                | chr2  | 233712992 | 233773299 | 2345  |
| HOPX       | -0.613854737 | 1.30564E-11 | 2.15794E-10 | DOWN   | HOP homeobox [Source:HGNC Symbol;Acc:HGNC:24961]                                                  | chr4  | 56647988  | 56681899  | 2447  |
| CORIN      | -0.587858855 | 1.41487E-11 | 2.32998E-10 | DOWN   | corin, serine peptidase [Source:HGNC Symbol;Acc:HGNC:19012]                                       | chr4  | 47593998  | 47838106  | 5352  |
| AC124067.2 | -0.833009129 | 1.53315E-11 | 2.51334E-10 | DOWN   |                                                                                                   | chr8  | 37516410  | 37517021  | 510   |
| TRBV4-2    | 0.645425351  | 1.6038E-11  | 2.62442E-10 | UP     | T-cell receptor beta variable 4-2 [Source:HGNC Symbol;Acc:HGNC:12216]                             | chr7  | 142345421 | 142345985 | 455   |
| GRB7       | -0.605057556 | 1.68323E-11 | 2.74695E-10 | DOWN   | growth factor receptor bound protein 7 [Source:HGNC Symbol;Acc:HGNC:4567]                         | chr17 | 39737927  | 39747291  | 2675  |
| C2orf40    | -0.834999144 | 1.69894E-11 | 2.77009E-10 | DOWN   | chromosome 2 open reading frame 40 [Source:HGNC Symbol;Acc:HGNC:24642]                            | chr2  | 106063294 | 106078159 | 991   |
| FOS        | -0.628971561 | 1.75373E-11 | 2.84663E-10 | DOWN   | Fos proto-oncogene, AP-1 transcription factor subunit [Source:HGNC Symbol;Acc:HGNC:3796]          | chr14 | 75278774  | 75282230  | 2938  |
| REEP1      | -0.746685241 | 1.80409E-11 | 2.91793E-10 | DOWN   | receptor accessory protein 1 [Source:HGNC Symbol;Acc:HGNC:25786]                                  | chr2  | 86213993  | 86338083  | 4105  |
| TH13       | -0.958250135 | 1.94839E-11 | 3.14851E-10 | DOWN   | tyrosine hydroxylase [Source:HGNC Symbol;Acc:HGNC:11782]                                          | chr11 | 2163929   | 2171877   | 1982  |
| ERP27      | -0.648224052 | 1.98179E-11 | 3.19395E-10 | DOWN   | endoplasmic reticulum protein 27 [Source:HGNC Symbol;Acc:HGNC:26495]                              | chr12 | 14914035  | 14939082  | 2277  |
| LONRF2     | -0.844747559 | 1.99484E-11 | 3.20926E-10 | DOWN   | LON peptidase N-terminal domain and ring finger 2 [Source:HGNC Symbol;Acc:HGNC:24788]             | chr2  | 100273291 | 100322733 | 13933 |
| P1FO       | -0.681153057 | 2.02858E-11 | 3.24913E-10 | DOWN   | primary cilia formation [Source:HGNC Symbol;Acc:HGNC:27009]                                       | chr1  | 111346288 | 111353013 | 2627  |

| PARAM      | logFC        | pval        | pval.adj    | UPDOWN | desc                                                                                                                     | chr   | start     | end       | size  |
|------------|--------------|-------------|-------------|--------|--------------------------------------------------------------------------------------------------------------------------|-------|-----------|-----------|-------|
| TRGV5      | 0.713171743  | 2.04636E-11 | 3.27183E-10 | UP     | T-cell receptor gamma variable 5 [Source:HGNC Symbol;Acc:HGNC:12290]                                                     | chr7  | 38349355  | 38350022  | 552   |
| KRT86      | 0.769565844  | 2.0563E-11  | 3.28482E-10 | UP     | keratin 86 [Source:HGNC Symbol;Acc:HGNC:6463]                                                                            | chr12 | 52274675  | 52309163  | 2265  |
| IYD        | -1.076030797 | 2.15141E-11 | 3.42769E-10 | DOWN   | iodotyrosine deiodinase [Source:HGNC Symbol;Acc:HGNC:21071]                                                              | chr6  | 150368892 | 150405969 | 10275 |
| AOC4P      | -0.633509157 | 2.23803E-11 | 3.547E-10   | DOWN   | amine oxidase, copper containing 4, pseudogene [Source:HGNC Symbol;Acc:HGNC:48869]                                       | chr17 | 42865922  | 42874369  | 2563  |
| AKR1C3     | -0.79966622  | 2.25162E-11 | 3.56232E-10 | DOWN   | aldo-keto reductase family 1 member C3 [Source:HGNC Symbol;Acc:HGNC:386]                                                 | chr10 | 5048812   | 5107686   | 2231  |
| CCL20      | 0.925434998  | 2.32296E-11 | 3.66239E-10 | UP     | C-C motif chemokine ligand 20 [Source:HGNC Symbol;Acc:HGNC:10619]                                                        | chr2  | 227813842 | 227817564 | 842   |
| KIR2DS4    | 0.781339548  | 2.33208E-11 | 3.67243E-10 | UP     | killer cell immunoglobulin like receptor, two Ig domains and short cytoplasmic tail 4 [Source:HGNC Symbol;Acc:HGNC:6336] | chr19 | 54832676  | 54848569  | 1608  |
| CILP2      | -0.611711207 | 2.33337E-11 | 3.67243E-10 | DOWN   | cartilage intermediate layer protein 2 [Source:HGNC Symbol;Acc:HGNC:24213]                                               | chr19 | 19538248  | 19546659  | 4234  |
| STK32A     | -0.944478099 | 2.45977E-11 | 3.85464E-10 | DOWN   | serine/threonine kinase 32A [Source:HGNC Symbol;Acc:HGNC:28317]                                                          | chr5  | 147234963 | 147387852 | 5529  |
| C4orf19    | -0.717703444 | 2.48069E-11 | 3.88406E-10 | DOWN   | chromosome 4 open reading frame 19 [Source:HGNC Symbol;Acc:HGNC:25618]                                                   | chr4  | 37453941  | 37623495  | 2770  |
| FAM189A1   | -0.870001014 | 2.58993E-11 | 4.0481E-10  | DOWN   | family with sequence similarity 189 member A1 [Source:HGNC Symbol;Acc:HGNC:29075]                                        | chr15 | 29120254  | 29570723  | 4705  |
| TMEM171    | 0.742332128  | 2.69341E-11 | 4.19537E-10 | UP     | transmembrane protein 171 [Source:HGNC Symbol;Acc:HGNC:27031]                                                            | chr5  | 73120292  | 73131817  | 1535  |
| TRBV6-6    | 0.627985336  | 2.75537E-11 | 4.28821E-10 | UP     | T-cell receptor beta variable 6-6 [Source:HGNC Symbol;Acc:HGNC:12231]                                                    | chr7  | 142469537 | 142470013 | 388   |
| ACTG2      | -0.741331421 | 2.75856E-11 | 4.2895E-10  | DOWN   | actin, gamma 2, smooth muscle, enteric [Source:HGNC Symbol;Acc:HGNC:145]                                                 | chr2  | 73892967  | 73919865  | 2671  |
| SVOP       | -0.748164196 | 3.00603E-11 | 4.63849E-10 | DOWN   | SVOP like [Source:HGNC Symbol;Acc:HGNC:27034]                                                                            | chr7  | 138594285 | 138701352 | 2035  |
| SPRR3      | -1.141195542 | 3.03671E-11 | 4.68185E-10 | DOWN   | small proline rich protein 3 [Source:HGNC Symbol;Acc:HGNC:11268]                                                         | chr1  | 153001747 | 153003856 | 986   |
| CXorf57    | -0.61817224  | 3.09576E-11 | 4.76074E-10 | DOWN   | chromosome X open reading frame 57 [Source:HGNC Symbol;Acc:HGNC:25486]                                                   | chrX  | 106611930 | 106679442 | 3903  |
| MAL        | -0.878950924 | 3.21091E-11 | 4.9253E-10  | DOWN   | mal, T-cell differentiation protein [Source:HGNC Symbol;Acc:HGNC:6817]                                                   | chr2  | 95025684  | 95033996  | 1112  |
| HTR2B      | -0.618014233 | 3.24547E-11 | 4.96989E-10 | DOWN   | 5-hydroxytryptamine receptor 2B [Source:HGNC Symbol;Acc:HGNC:5294]                                                       | chr2  | 231108230 | 231125118 | 2246  |
| ISM1       | -0.593645701 | 3.39924E-11 | 5.19222E-10 | DOWN   | isthmin 1 [Source:HGNC Symbol;Acc:HGNC:16213]                                                                            | chr20 | 13221771  | 13300651  | 2593  |
| KRT23      | -1.063680355 | 3.50183E-11 | 5.33543E-10 | DOWN   | keratin 23 [Source:HGNC Symbol;Acc:HGNC:6438]                                                                            | chr17 | 40922696  | 40937450  | 2235  |
| HS6ST2     | -0.793143966 | 3.95738E-11 | 5.9743E-10  | DOWN   | heparan sulfate 6-O-sulfotransferase 2 [Source:HGNC Symbol;Acc:HGNC:19133]                                               | chrX  | 132626016 | 132961395 | 4615  |
| C7         | -0.998196999 | 4.05202E-11 | 6.09686E-10 | DOWN   | complement C7 [Source:HGNC Symbol;Acc:HGNC:1346]                                                                         | chr5  | 40909252  | 40982939  | 4257  |
| PRSS22     | -0.741961274 | 4.08641E-11 | 6.1435E-10  | DOWN   | protease, serine 22 [Source:HGNC Symbol;Acc:HGNC:14368]                                                                  | chr16 | 2852727   | 2858170   | 1386  |
| KRTAP5-7   | -0.781440465 | 4.20948E-11 | 6.3024E-10  | DOWN   | keratin associated protein 5-7 [Source:HGNC Symbol;Acc:HGNC:23602]                                                       | chr11 | 71527267  | 71528674  | 1408  |
| EPCAM      | -0.762221466 | 4.38195E-11 | 6.54441E-10 | DOWN   | epithelial cell adhesion molecule [Source:HGNC Symbol;Acc:HGNC:11529]                                                    | chr2  | 47345158  | 47387034  | 2010  |
| FSTL4      | -0.925493975 | 4.52046E-11 | 6.70183E-10 | DOWN   | folliculin like 4 [Source:HGNC Symbol;Acc:HGNC:21389]                                                                    | chr5  | 133196455 | 133612564 | 5420  |
| VTGN1      | -1.013111744 | 4.52062E-11 | 6.70183E-10 | DOWN   | V-set domain containing T-cell activation inhibitor 1 [Source:HGNC Symbol;Acc:HGNC:28873]                                | chr1  | 117143587 | 117210960 | 3025  |
| MTUS2      | -0.800450038 | 5.23137E-11 | 7.6492E-10  | DOWN   | microtubule associated scaffold protein 2 [Source:HGNC Symbol;Acc:HGNC:20595]                                            | chr13 | 28820348  | 29505947  | 7700  |
| SCN7A      | -0.867860015 | 5.40597E-11 | 7.89175E-10 | DOWN   | sodium voltage-gated channel alpha subunit 7 [Source:HGNC Symbol;Acc:HGNC:10594]                                         | chr2  | 166403573 | 166486971 | 7188  |
| CRYM       | -0.815977134 | 5.47918E-11 | 7.98577E-10 | DOWN   | crystallin mu [Source:HGNC Symbol;Acc:HGNC:2418]                                                                         | chr16 | 21258518  | 21303051  | 1474  |
| LINC00482  | -0.720121065 | 5.5877E-11  | 8.12434E-10 | DOWN   | long intergenic non-protein coding RNA 482 [Source:HGNC Symbol;Acc:HGNC:26816]                                           | chr17 | 81303771  | 81309248  | 2023  |
| CACNA1G    | -0.63549138  | 5.92284E-11 | 8.55673E-10 | DOWN   | calcium voltage-gated channel subunit alpha1 G [Source:HGNC Symbol;Acc:HGNC:1394]                                        | chr17 | 50561068  | 50627474  | 8719  |
| DIO3OS     | -0.703783572 | 6.49184E-11 | 9.31198E-10 | DOWN   | DIO3 opposite strand/antisense RNA (head to head) [Source:HGNC Symbol;Acc:HGNC:20348]                                    | chr14 | 101552223 | 101560431 | 4410  |
| PEG3       | -0.627391304 | 6.7492E-11  | 9.64301E-10 | DOWN   | paternally expressed 3 [Source:HGNC Symbol;Acc:HGNC:8826]                                                                | chr19 | 56810083  | 56840726  | 8759  |
| CRLF1      | -0.84131423  | 6.79752E-11 | 9.70439E-10 | DOWN   | cytokine receptor like factor 1 [Source:HGNC Symbol;Acc:HGNC:2364]                                                       | chr19 | 18593237  | 18606850  | 1792  |
| GLB1L2     | -0.672868078 | 6.89444E-11 | 9.81186E-10 | DOWN   | galactosidase beta 1 like 2 [Source:HGNC Symbol;Acc:HGNC:25129]                                                          | chr11 | 134331874 | 134376324 | 3365  |
| S100A8     | 0.86205872   | 6.91858E-11 | 9.83849E-10 | UP     | S100 calcium binding protein A8 [Source:HGNC Symbol;Acc:HGNC:10498]                                                      | chr1  | 153390032 | 153391188 | 643   |
| AC060834.1 | -0.760968517 | 7.30456E-11 | 1.03387E-09 | DOWN   |                                                                                                                          | chr7  | 9726241   | 9728272   | 2032  |
| CCL14      | -0.708462155 | 7.75946E-11 | 1.09569E-09 | DOWN   | C-C motif chemokine ligand 14 [Source:HGNC Symbol;Acc:HGNC:10612]                                                        | chr17 | 35983291  | 35987004  | 3269  |
| IGHV3-30   | 0.879236016  | 8.00165E-11 | 1.12463E-09 | UP     | immunoglobulin heavy variable 3-30 [Source:HGNC Symbol;Acc:HGNC:5591]                                                    | chr14 | 106335082 | 106335613 | 431   |
| DNAL1      | -0.625401512 | 8.03044E-11 | 1.12668E-09 | DOWN   | dynein axonemal light intermediate chain 1 [Source:HGNC Symbol;Acc:HGNC:14353]                                           | chr1  | 37556919  | 37566857  | 2649  |
| TTC23L     | -0.590688379 | 8.44509E-11 | 1.18055E-09 | DOWN   | tetrapeptide repeat domain 23 like [Source:HGNC Symbol;Acc:HGNC:26355]                                                   | chr5  | 34839164  | 34899456  | 1358  |
| FMO5       | -0.644021875 | 9.12623E-11 | 1.26981E-09 | DOWN   | flavin containing monooxygenase 5 [Source:HGNC Symbol;Acc:HGNC:3773]                                                     | chr1  | 147184305 | 147225638 | 3178  |
| FXD3       | -0.862890066 | 9.34437E-11 | 1.29627E-09 | DOWN   | FXD domain containing ion transport regulator 3 [Source:HGNC Symbol;Acc:HGNC:4027]                                       | chr19 | 35115879  | 35124324  | 2862  |
| SLC38A11   | -0.67842885  | 9.38501E-11 | 1.3002E-09  | DOWN   | solute carrier family 38 member 11 [Source:HGNC Symbol;Acc:HGNC:26836]                                                   | chr2  | 164896186 | 164955525 | 4009  |
| GRHL2      | -0.858765789 | 9.50956E-11 | 1.31617E-09 | DOWN   | grainyhead like transcription factor 2 [Source:HGNC Symbol;Acc:HGNC:2799]                                                | chr8  | 101492432 | 101669726 | 5299  |
| ACSBG1     | -0.864439756 | 1.01249E-10 | 1.39929E-09 | DOWN   | acyl-CoA synthetase bubblegum family member 1 [Source:HGNC Symbol;Acc:HGNC:29567]                                        | chr15 | 78167468  | 78245688  | 6777  |
| AC010329.5 | -0.830970503 | 1.0192E-10  | 1.4074E-09  | DOWN   |                                                                                                                          | chr19 | 20674923  | 20696533  | 2174  |
| DUOXA1     | -0.722812075 | 1.18014E-10 | 1.61001E-09 | DOWN   | dual oxidase maturation factor 1 [Source:HGNC Symbol;Acc:HGNC:26507]                                                     | chr15 | 45117367  | 45129877  | 3288  |
| TRHDE-AS1  | -0.923686199 | 1.20563E-10 | 1.64232E-09 | DOWN   | TRHDE antisense RNA 1 [Source:HGNC Symbol;Acc:HGNC:27471]                                                                | chr12 | 72253513  | 72274907  | 6310  |
| HNRNPA1P22 | -0.840990033 | 1.44395E-10 | 1.94359E-09 | DOWN   | heterogeneous nuclear ribonucleoprotein A1 pseudogene 22 [Source:HGNC Symbol;Acc:HGNC:39540]                             | chr3  | 42889361  | 42890306  | 946   |
| SULT2A1    | -1.315605178 | 1.55166E-10 | 2.07799E-09 | DOWN   | sulfotransferase family 2A member 1 [Source:HGNC Symbol;Acc:HGNC:11458]                                                  | chr19 | 47870466  | 47886397  | 1987  |
| ADGRF4     | -0.750280389 | 1.55297E-10 | 2.07799E-09 | DOWN   | adhesion G protein-coupled receptor F4 [Source:HGNC Symbol;Acc:HGNC:19011]                                               | chr6  | 47685864  | 47722021  | 3391  |
| SCRG1      | -0.842290063 | 1.69833E-10 | 2.2575E-09  | DOWN   | stimulator of chondrogenesis 1 [Source:HGNC Symbol;Acc:HGNC:17036]                                                       | chr4  | 173384701 | 173399536 | 4420  |
| GLP2R      | -0.740335815 | 1.7032E-10  | 2.26233E-09 | DOWN   | glucagon like peptide 2 receptor [Source:HGNC Symbol;Acc:HGNC:4325]                                                      | chr17 | 9822206   | 9892102   | 4652  |



| PARAM      | logFC        | pval        | pval.adj    | UPDOWN | desc                                                                                             | chr   | start     | end       | size  |
|------------|--------------|-------------|-------------|--------|--------------------------------------------------------------------------------------------------|-------|-----------|-----------|-------|
| STAB2      | -0.976519496 | 1.74573E-10 | 2.31543E-09 | DOWN   | stabilin 2 [Source:HGNC Symbol;Acc:HGNC:18629]                                                   | chr12 | 103587273 | 103766727 | 8251  |
| TRAV8-6    | 0.60067812   | 1.81629E-10 | 2.40548E-09 | UP     | T-cell receptor alpha variable 8-6 [Source:HGNC Symbol;Acc:HGNC:12151]                           | chr14 | 21978459  | 21979120  | 561   |
| GABBR2     | -1.045201372 | 1.85273E-10 | 2.45017E-09 | DOWN   | gamma-aminobutyric acid type B receptor subunit 2 [Source:HGNC Symbol;Acc:HGNC:4507]             | chr9  | 98288082  | 98709197  | 5788  |
| MUC2       | -1.202728237 | 1.91773E-10 | 2.53244E-09 | DOWN   | mucin 2, oligomeric mucus/gel-forming [Source:HGNC Symbol;Acc:HGNC:7512]                         | chr11 | 1094474   | 1099340   | 4845  |
| HNF1B      | -1.222894259 | 1.98345E-10 | 2.60972E-09 | DOWN   | HNF1 homeobox B [Source:HGNC Symbol;Acc:HGNC:11630]                                              | chr17 | 37686432  | 37745247  | 2978  |
| THSD7B     | -0.726940718 | 1.99784E-10 | 2.62295E-09 | DOWN   | thrombospondin type 1 domain containing 7B [Source:HGNC Symbol;Acc:HGNC:29348]                   | chr2  | 136765545 | 137677717 | 6165  |
| CE51       | -0.863778498 | 2.05953E-10 | 2.69418E-09 | DOWN   | carboxylesterase 1 [Source:HGNC Symbol;Acc:HGNC:1863]                                            | chr16 | 55802853  | 55833337  | 2185  |
| AC098934.2 | -0.597977325 | 2.11493E-10 | 2.76266E-09 | DOWN   |                                                                                                  | chr1  | 202861754 | 202875241 | 2321  |
| MYO3B      | -0.820355315 | 2.3576E-10  | 3.06201E-09 | DOWN   | myosin IIB [Source:HGNC Symbol;Acc:HGNC:15576]                                                   | chr2  | 170178145 | 170654481 | 5529  |
| SGSM1      | -0.589523342 | 2.46216E-10 | 3.19095E-09 | DOWN   | small G protein signaling modulator 1 [Source:HGNC Symbol;Acc:HGNC:29410]                        | chr22 | 24806169  | 24927578  | 6908  |
| TRAV8-2    | 0.592256911  | 2.54839E-10 | 3.29799E-09 | UP     | T-cell receptor alpha variable 8-2 [Source:HGNC Symbol;Acc:HGNC:12147]                           | chr14 | 21846537  | 21847221  | 566   |
| ZNF750     | -0.884750468 | 2.57137E-10 | 3.32535E-09 | DOWN   | zinc finger protein 750 [Source:HGNC Symbol;Acc:HGNC:25843]                                      | chr17 | 82829435  | 82840578  | 3713  |
| TRAV1-2    | 0.61436564   | 2.75922E-10 | 3.55561E-09 | UP     | T-cell receptor alpha variable 1-2 [Source:HGNC Symbol;Acc:HGNC:12102]                           | chr14 | 21642889  | 21643578  | 402   |
| MKRN2OS    | -0.702470358 | 3.13374E-10 | 3.98721E-09 | DOWN   | MKRN2 opposite strand [Source:HGNC Symbol;Acc:HGNC:40375]                                        | chr3  | 12539972  | 12545556  | 985   |
| CHP2       | -0.984925092 | 3.2997E-10  | 4.18956E-09 | DOWN   | calineurin like EF-hand protein 2 [Source:HGNC Symbol;Acc:HGNC:24927]                            | chr16 | 23754627  | 23758951  | 2382  |
| EEF1A2     | -1.06493868  | 3.39161E-10 | 4.29723E-09 | DOWN   | eukaryotic translation elongation factor 1 alpha 2 [Source:HGNC Symbol;Acc:HGNC:3192]            | chr20 | 63488013  | 63499315  | 2006  |
| TAC3       | -1.049230204 | 3.60632E-10 | 4.54071E-09 | DOWN   | tachykinin 3 [Source:HGNC Symbol;Acc:HGNC:11521]                                                 | chr12 | 57010000  | 57028883  | 1265  |
| SGK2       | -0.675927152 | 3.9846E-10  | 4.99273E-09 | DOWN   | SGK2, serine/threonine kinase 2 [Source:HGNC Symbol;Acc:HGNC:13900]                              | chr20 | 43558968  | 43585677  | 2935  |
| GYGP21     | -0.831541495 | 4.01446E-10 | 5.02666E-09 | DOWN   | glycogenin 2 pseudogene 1 [Source:HGNC Symbol;Acc:HGNC:4701]                                     | chrY  | 12354416  | 12420456  | 979   |
| DES        | -0.941365095 | 4.14807E-10 | 5.17966E-09 | DOWN   | desmin [Source:HGNC Symbol;Acc:HGNC:2770]                                                        | chr2  | 219418377 | 219426739 | 2248  |
| RPS6KA6    | -0.624950651 | 4.23344E-10 | 5.27173E-09 | DOWN   | ribosomal protein S6 kinase A6 [Source:HGNC Symbol;Acc:HGNC:10435]                               | chrX  | 84058346  | 84187907  | 8258  |
| SNTG1      | -0.996358762 | 5.09416E-10 | 6.23794E-09 | DOWN   | syntrophin gamma 1 [Source:HGNC Symbol;Acc:HGNC:13740]                                           | chr8  | 49909789  | 50794118  | 3773  |
| COMP       | -0.891367512 | 5.19917E-10 | 6.35217E-09 | DOWN   | cartilage oligomeric matrix protein [Source:HGNC Symbol;Acc:HGNC:2227]                           | chr19 | 18782773  | 18791314  | 2716  |
| MYL3       | -0.650993482 | 5.36921E-10 | 6.54228E-09 | DOWN   | myosin light chain 3 [Source:HGNC Symbol;Acc:HGNC:7584]                                          | chr3  | 46857872  | 46863483  | 1053  |
| PRR15      | -0.697541981 | 5.52979E-10 | 6.7289E-09  | DOWN   | proline rich 15 [Source:HGNC Symbol;Acc:HGNC:22310]                                              | chr7  | 29563811  | 29567295  | 1678  |
| ACKR2      | -0.721041481 | 5.54868E-10 | 6.74515E-09 | DOWN   | atypical chemokine receptor 2 [Source:HGNC Symbol;Acc:HGNC:1565]                                 | chr3  | 42809472  | 42867283  | 2960  |
| PI3        | 1.174179017  | 5.84775E-10 | 7.07309E-09 | UP     | peptidase inhibitor 3 [Source:HGNC Symbol;Acc:HGNC:8947]                                         | chr20 | 45174876  | 45176544  | 577   |
| CFB        | 0.59018743   | 6.08145E-10 | 7.32643E-09 | UP     | complement factor B [Source:HGNC Symbol;Acc:HGNC:1037]                                           | chr6  | 31945709  | 31952084  | 2862  |
| ACOXL      | -0.770882187 | 6.34785E-10 | 7.6271E-09  | DOWN   | acyl-CoA oxidase like [Source:HGNC Symbol;Acc:HGNC:25621]                                        | chr2  | 110732573 | 111118222 | 4558  |
| KRTAP5-8   | -0.792056702 | 6.67336E-10 | 7.99701E-09 | DOWN   | keratin associated protein 5-8 [Source:HGNC Symbol;Acc:HGNC:23603]                               | chr11 | 71538025  | 71539207  | 1183  |
| EXOC3L4    | 0.631202762  | 7.47026E-10 | 8.88735E-09 | UP     | exocyst complex component 3 like 4 [Source:HGNC Symbol;Acc:HGNC:20120]                           | chr14 | 103100144 | 103110271 | 2293  |
| PLN        | -0.617121976 | 7.62375E-10 | 9.06401E-09 | DOWN   | phospholamban [Source:HGNC Symbol;Acc:HGNC:9080]                                                 | chr6  | 118548298 | 118560730 | 2001  |
| HLA-DQA1   | 0.626305705  | 8.50133E-10 | 1.0035E-08  | UP     | major histocompatibility complex, class II, DQ alpha 1 [Source:HGNC Symbol;Acc:HGNC:4942]        | chr6  | 32637357  | 32643652  | 1758  |
| IGFL1      | -1.009399191 | 8.693E-10   | 1.02412E-08 | DOWN   | IGF like family member 1 [Source:HGNC Symbol;Acc:HGNC:24093]                                     | chr19 | 46229752  | 46231243  | 769   |
| MYOC       | -0.788106642 | 8.88504E-10 | 1.04607E-08 | DOWN   | myocilin [Source:HGNC Symbol;Acc:HGNC:7610]                                                      | chr1  | 171635417 | 171652683 | 2095  |
| RPSAP11    | -0.652621565 | 1.11488E-09 | 1.2908E-08  | DOWN   | ribosomal protein SA pseudogene 11 [Source:HGNC Symbol;Acc:HGNC:6503]                            | chr3  | 32190747  | 32191627  | 881   |
| TNNT2      | -0.638390831 | 1.11788E-09 | 1.29344E-08 | DOWN   | troponin T2, cardiac type [Source:HGNC Symbol;Acc:HGNC:11949]                                    | chr1  | 201359008 | 201377762 | 1419  |
| CMA1       | -0.69170222  | 1.12052E-09 | 1.29484E-08 | DOWN   | chymase 1 [Source:HGNC Symbol;Acc:HGNC:2097]                                                     | chr14 | 24505353  | 24508265  | 937   |
| IL1RAPL2   | -0.777164876 | 1.15813E-09 | 1.33068E-08 | DOWN   | interleukin 1 receptor accessory protein like 2 [Source:HGNC Symbol;Acc:HGNC:5997]               | chrX  | 104566315 | 105767829 | 2986  |
| SULT1A2    | -0.735796089 | 1.33075E-09 | 1.51082E-08 | DOWN   | sulfotransferase family 1A member 2 [Source:HGNC Symbol;Acc:HGNC:11454]                          | chr16 | 28591943  | 28597109  | 2275  |
| TMEM132C   | -0.751599196 | 1.3558E-09  | 1.53733E-08 | DOWN   | transmembrane protein 132C [Source:HGNC Symbol;Acc:HGNC:25436]                                   | chr12 | 128267403 | 128707915 | 4947  |
| CACNG4     | -0.90952846  | 1.61981E-09 | 1.80287E-08 | DOWN   | calcium voltage-gated channel auxiliary subunit gamma 4 [Source:HGNC Symbol;Acc:HGNC:1408]       | chr17 | 66964910  | 67033398  | 3380  |
| GRIN3A     | 0.659727111  | 1.63263E-09 | 1.81603E-08 | UP     | glutamate ionotropic receptor NMDA type subunit 3A [Source:HGNC Symbol;Acc:HGNC:16767]           | chr9  | 101569353 | 101738580 | 7770  |
| HPSE2      | -0.710601706 | 1.63396E-09 | 1.8164E-08  | DOWN   | heparanase 2 (inactive) [Source:HGNC Symbol;Acc:HGNC:18374]                                      | chr10 | 98457077  | 99235862  | 4421  |
| RGS20      | 0.713108937  | 1.64124E-09 | 1.82336E-08 | UP     | regulator of G protein signaling 20 [Source:HGNC Symbol;Acc:HGNC:14600]                          | chr8  | 53851808  | 53959303  | 2317  |
| CSDC2      | -0.615185318 | 1.70906E-09 | 1.8883E-08  | DOWN   | cold shock domain containing C2 [Source:HGNC Symbol;Acc:HGNC:30359]                              | chr22 | 41560763  | 41576666  | 2777  |
| CXCL14     | -0.685472724 | 1.94414E-09 | 2.12217E-08 | DOWN   | C-X-C motif chemokine ligand 14 [Source:HGNC Symbol;Acc:HGNC:10640]                              | chr5  | 135570679 | 13559279  | 1975  |
| ZNF209P    | -0.793732666 | 2.0251E-09  | 2.20655E-08 | DOWN   | zinc finger protein 209, pseudogene [Source:HGNC Symbol;Acc:HGNC:13000]                          | chr19 | 22463922  | 22473036  | 2304  |
| PTK6       | -0.664136392 | 2.04812E-09 | 2.2303E-08  | DOWN   | protein tyrosine kinase 6 [Source:HGNC Symbol;Acc:HGNC:9617]                                     | chr20 | 63528001  | 63537370  | 2947  |
| NTRK3      | -0.653745506 | 2.08719E-09 | 2.26876E-08 | DOWN   | neurotrophic receptor tyrosine kinase 3 [Source:HGNC Symbol;Acc:HGNC:8033]                       | chr15 | 87859751  | 88256747  | 25284 |
| KCNG1      | -0.746038253 | 2.44691E-09 | 2.6267E-08  | DOWN   | potassium voltage-gated channel modifier subfamily G member 1 [Source:HGNC Symbol;Acc:HGNC:6248] | chr20 | 51003656  | 51023129  | 2211  |
| SBK1       | -0.625668196 | 2.68436E-09 | 2.85791E-08 | DOWN   | SH3 domain binding kinase 1 [Source:HGNC Symbol;Acc:HGNC:17699]                                  | chr16 | 28292519  | 28323849  | 4992  |
| MYCN       | -0.734180689 | 2.77247E-09 | 2.94134E-08 | DOWN   | MYCN proto-oncogene, bHLH transcription factor [Source:HGNC Symbol;Acc:HGNC:7559]                | chr2  | 15940564  | 15947007  | 2602  |
| SELE       | -0.596587621 | 2.77485E-09 | 2.94216E-08 | DOWN   | selectin E [Source:HGNC Symbol;Acc:HGNC:10718]                                                   | chr1  | 169722641 | 169734062 | 3857  |
| TUBB8      | -0.657436627 | 3.00332E-09 | 3.16956E-08 | DOWN   | tubulin beta 8 class VIII [Source:HGNC Symbol;Acc:HGNC:20773]                                    | chr10 | 46892     | 74163     | 2791  |
| TRBV4-1    | 0.59628672   | 3.09713E-09 | 3.26477E-08 | UP     | T-cell receptor beta variable 4-1 [Source:HGNC Symbol;Acc:HGNC:12215]                            | chr7  | 142313184 | 142313666 | 373   |

| PARAM       | logFC        | pval        | pval.adj    | UPDOWN | desc                                                                                                    | chr   | start     | end       | size  |
|-------------|--------------|-------------|-------------|--------|---------------------------------------------------------------------------------------------------------|-------|-----------|-----------|-------|
| TMEM40      | -0.736383578 | 3.17981E-09 | 3.34803E-08 | DOWN   | transmembrane protein 40 [Source:HGNC Symbol;Acc:HGNC:25620]                                            | chr3  | 12733525  | 12769457  | 2515  |
| ALG1L       | -0.637229459 | 3.28341E-09 | 3.44911E-08 | DOWN   | ALG1, chitobiosylidiphosphodolichol beta-mannosyltransferase like [Source:HGNC Symbol;Acc:HGNC:33721]   | chr3  | 125929275 | 125937039 | 843   |
| AC092118.1  | -0.669563564 | 3.50572E-09 | 3.66775E-08 | DOWN   |                                                                                                         | chr16 | 57798265  | 57816946  | 2035  |
| PRR15L      | -0.843533831 | 3.63292E-09 | 3.78772E-08 | DOWN   | proline rich 15 like [Source:HGNC Symbol;Acc:HGNC:28149]                                                | chr17 | 47951967  | 47957878  | 1519  |
| AQP7        | -0.74767872  | 3.82806E-09 | 3.97693E-08 | DOWN   | aquaporin 7 [Source:HGNC Symbol;Acc:HGNC:640]                                                           | chr9  | 33383179  | 33402586  | 3829  |
| TACSTD2     | -0.670742447 | 3.8889E-09  | 4.03143E-08 | DOWN   | tumor associated calcium signal transducer 2 [Source:HGNC Symbol;Acc:HGNC:11530]                        | chr1  | 58575423  | 58577773  | 2351  |
| HHIP        | -0.806903198 | 4.04043E-09 | 4.17181E-08 | DOWN   | hedghog interacting protein [Source:HGNC Symbol;Acc:HGNC:14866]                                         | chr4  | 144646021 | 144745271 | 10507 |
| CECR2       | -0.701097915 | 4.36942E-09 | 4.47077E-08 | DOWN   | CECR2, histone acetyl-lysine reader [Source:HGNC Symbol;Acc:HGNC:1840]                                  | chr22 | 17359949  | 17558149  | 10324 |
| RIPPLY3     | -0.623880003 | 4.39417E-09 | 4.49108E-08 | DOWN   | rippy transcriptional repressor 3 [Source:HGNC Symbol;Acc:HGNC:3047]                                    | chr21 | 37006563  | 37019659  | 2235  |
| KRT80       | -0.58504431  | 4.43287E-09 | 4.52293E-08 | DOWN   | keratin 80 [Source:HGNC Symbol;Acc:HGNC:27056]                                                          | chr12 | 52168996  | 52192000  | 3894  |
| IGHV3-21    | 0.791061687  | 4.71913E-09 | 4.79342E-08 | UP     | immunoglobulin heavy variable 3-21 [Source:HGNC Symbol;Acc:HGNC:5586]                                   | chr14 | 106235064 | 106235594 | 430   |
| PLIN5       | -0.612919958 | 5.29342E-09 | 5.32603E-08 | DOWN   | perilipin 5 [Source:HGNC Symbol;Acc:HGNC:33196]                                                         | chr19 | 4522531   | 4535224   | 4292  |
| GJB6        | -0.943470861 | 5.55922E-09 | 5.58107E-08 | DOWN   | gap junction protein beta 6 [Source:HGNC Symbol;Acc:HGNC:4288]                                          | chr13 | 20221971  | 20232395  | 2646  |
| TRPM5       | -0.706218302 | 5.68403E-09 | 5.69376E-08 | DOWN   | transient receptor potential cation channel subfamily M member 5 [Source:HGNC Symbol;Acc:HGNC:14323]    | chr11 | 2404515   | 2423045   | 3956  |
| RG56        | -0.687034555 | 5.72373E-09 | 5.72721E-08 | DOWN   | regulator of G protein signaling 6 [Source:HGNC Symbol;Acc:HGNC:10002]                                  | chr14 | 71932349  | 72566529  | 7145  |
| MMP12       | 0.776872558  | 5.83416E-09 | 5.82805E-08 | UP     | matrix metalloproteinase 12 [Source:HGNC Symbol;Acc:HGNC:7158]                                          | chr11 | 102862736 | 102875034 | 1874  |
| PNCK        | -0.778177387 | 5.85023E-09 | 5.8382E-08  | DOWN   | pregnancy up-regulated nonubiquitous CaM kinase [Source:HGNC Symbol;Acc:HGNC:13415]                     | chrX  | 153669730 | 153674361 | 2258  |
| SLC1A6      | -1.009852016 | 5.85076E-09 | 5.8382E-08  | DOWN   | solute carrier family 1 member 6 [Source:HGNC Symbol;Acc:HGNC:10944]                                    | chr19 | 14950034  | 15010620  | 4650  |
| GFRA1       | -0.687941871 | 6.29919E-09 | 6.24785E-08 | DOWN   | GNDF family receptor alpha 1 [Source:HGNC Symbol;Acc:HGNC:4243]                                         | chr10 | 116056925 | 116273467 | 9429  |
| ADAMTS8     | -0.592974563 | 6.99725E-09 | 6.87626E-08 | DOWN   | ADAM metalloproteinase with thrombospondin type 1 motif 8 [Source:HGNC Symbol;Acc:HGNC:224]             | chr11 | 130404925 | 130428993 | 4010  |
| TBX1        | -0.609374507 | 8.01154E-09 | 7.79696E-08 | DOWN   | T-box 1 [Source:HGNC Symbol;Acc:HGNC:11592]                                                             | chr22 | 19756703  | 19783593  | 2811  |
| AGTR1       | -0.664831372 | 8.03306E-09 | 7.8137E-08  | DOWN   | angiotensin II receptor type 1 [Source:HGNC Symbol;Acc:HGNC:336]                                        | chr3  | 148697784 | 148743008 | 3165  |
| MYT1        | -0.994656143 | 9.24713E-09 | 8.90386E-08 | DOWN   | myelin transcription factor 1 [Source:HGNC Symbol;Acc:HGNC:7622]                                        | chr20 | 64151791  | 64242253  | 5867  |
| SH3TC2      | -0.595394666 | 9.51975E-09 | 9.14209E-08 | DOWN   | SH3 domain and tetratricopeptide repeats 2 [Source:HGNC Symbol;Acc:HGNC:29427]                          | chr5  | 149003953 | 149063124 | 6261  |
| HSD17B2     | -0.767067462 | 9.58564E-09 | 9.19562E-08 | DOWN   | hydroxysteroid 17-beta dehydrogenase 2 [Source:HGNC Symbol;Acc:HGNC:5211]                               | chr16 | 82035232  | 82098534  | 1455  |
| ZSCAN4      | -0.683387912 | 1.00877E-08 | 9.64663E-08 | DOWN   | zinc finger and SCAN domain containing 4 [Source:HGNC Symbol;Acc:HGNC:23709]                            | chr19 | 57668935  | 57679152  | 2249  |
| LYPD3       | -0.678559466 | 1.05427E-08 | 1.005E-07   | DOWN   | LY6/PLAUR domain containing 3 [Source:HGNC Symbol;Acc:HGNC:24880]                                       | chr19 | 43460787  | 43465660  | 1694  |
| SLITRK3     | -0.761786337 | 1.20368E-08 | 1.13666E-07 | DOWN   | SLIT and NTRK like family member 3 [Source:HGNC Symbol;Acc:HGNC:23501]                                  | chr3  | 165186720 | 165196852 | 4816  |
| CTSG        | -0.613903736 | 1.24123E-08 | 1.16908E-07 | DOWN   | cathepsin G [Source:HGNC Symbol;Acc:HGNC:2532]                                                          | chr14 | 24573556  | 24576260  | 886   |
| SERPINA1    | 0.674308331  | 1.26217E-08 | 1.18634E-07 | UP     | serpin family A member 1 [Source:HGNC Symbol;Acc:HGNC:8941]                                             | chr14 | 94376747  | 94390693  | 4039  |
| PCDH11Y     | -0.842843264 | 1.35413E-08 | 1.26621E-07 | DOWN   | protocadherin 11 Y-linked [Source:HGNC Symbol;Acc:HGNC:15813]                                           | chrY  | 5000226   | 5742224   | 11601 |
| PACRG       | -0.614305119 | 1.40046E-08 | 1.3008E-07  | DOWN   | parkin coregulated [Source:HGNC Symbol;Acc:HGNC:19152]                                                  | chr6  | 162727132 | 163315492 | 1858  |
| FUT3        | -0.779365036 | 1.4705E-08  | 1.3589E-07  | DOWN   | fucosyltransferase 3 (Lewis blood group) [Source:HGNC Symbol;Acc:HGNC:4014]                             | chr19 | 5842888   | 5851474   | 2590  |
| PIANP       | -0.605788451 | 1.48744E-08 | 1.37176E-07 | DOWN   | PILR alpha associated neural protein [Source:HGNC Symbol;Acc:HGNC:25338]                                | chr12 | 6693792   | 6700800   | 2991  |
| MUC16       | 1.172132502  | 1.56264E-08 | 1.43092E-07 | UP     | mucin 16, cell surface associated [Source:HGNC Symbol;Acc:HGNC:15582]                                   | chr19 | 8848844   | 8981342   | 43816 |
| TCEAL5      | -0.621317577 | 1.61159E-08 | 1.4698E-07  | DOWN   | transcription elongation factor A like 5 [Source:HGNC Symbol;Acc:HGNC:22282]                            | chrX  | 103273691 | 103276872 | 1168  |
| B3GALT5-AS1 | -0.667183636 | 1.66254E-08 | 1.51323E-07 | DOWN   | B3GALT5 antisense RNA 1 [Source:HGNC Symbol;Acc:HGNC:16424]                                             | chr21 | 39597147  | 39612821  | 2516  |
| DGKB        | -0.642689053 | 1.72959E-08 | 1.56953E-07 | DOWN   | diacylglycerol kinase beta [Source:HGNC Symbol;Acc:HGNC:2850]                                           | chr7  | 14145049  | 14903361  | 8034  |
| ADCY2       | -0.610667585 | 2.10536E-08 | 1.87579E-07 | DOWN   | adenylate cyclase 2 [Source:HGNC Symbol;Acc:HGNC:233]                                                   | chr5  | 7396208   | 73830081  | 6575  |
| PLCXD3      | -0.734541237 | 2.13361E-08 | 1.89723E-07 | DOWN   | phosphatidylinositol specific phospholipase C X domain containing 3 [Source:HGNC Symbol;Acc:HGNC:31822] | chr5  | 41306954  | 41510628  | 7731  |
| MYRIP       | -0.603199522 | 2.16825E-08 | 1.92708E-07 | DOWN   | myosin VIIA and Rab interacting protein [Source:HGNC Symbol;Acc:HGNC:19156]                             | chr3  | 39808914  | 40260321  | 5385  |
| IGLV3-1     | 0.770705233  | 2.18948E-08 | 1.945E-07   | UP     | immunoglobulin lambda variable 3-1 [Source:HGNC Symbol;Acc:HGNC:5896]                                   | chr22 | 22880706  | 22881396  | 398   |
| ALOX15      | -0.665986649 | 2.19213E-08 | 1.94641E-07 | DOWN   | arachidonate 15-lipoxygenase [Source:HGNC Symbol;Acc:HGNC:433]                                          | chr17 | 4630902   | 4642294   | 3043  |
| KRTAP5-10   | -0.653342371 | 2.24106E-08 | 1.98401E-07 | DOWN   | keratin associated protein 5-10 [Source:HGNC Symbol;Acc:HGNC:23605]                                     | chr11 | 71565563  | 71566738  | 1176  |
| IL31RA      | 0.737600797  | 2.27461E-08 | 2.01077E-07 | UP     | interleukin 31 receptor A [Source:HGNC Symbol;Acc:HGNC:18969]                                           | chr5  | 55851379  | 55922853  | 4576  |
| IGLV3-25    | 0.737900712  | 2.31648E-08 | 2.04295E-07 | UP     | immunoglobulin lambda variable 3-25 [Source:HGNC Symbol;Acc:HGNC:5908]                                  | chr22 | 22686726  | 22687271  | 380   |
| KRT19       | -0.702664426 | 2.39386E-08 | 2.10388E-07 | DOWN   | keratin 19 [Source:HGNC Symbol;Acc:HGNC:6436]                                                           | chr17 | 4152366   | 41528308  | 1390  |
| SEMA3E      | -0.689826898 | 2.43739E-08 | 2.13902E-07 | DOWN   | semaphorin 3E [Source:HGNC Symbol;Acc:HGNC:10727]                                                       | chr7  | 83363906  | 83649010  | 6576  |
| LAMP5       | -0.615840072 | 2.93432E-08 | 2.53706E-07 | DOWN   | lysosomal associated membrane protein family member 5 [Source:HGNC Symbol;Acc:HGNC:16097]               | chr20 | 9514358   | 9530524   | 2042  |
| CDO1        | -0.705225488 | 2.99562E-08 | 2.5839E-07  | DOWN   | cysteine dioxygenase type 1 [Source:HGNC Symbol;Acc:HGNC:1795]                                          | chr5  | 115804733 | 115816954 | 1860  |
| AC009123.1  | -0.650324779 | 3.09482E-08 | 2.66187E-07 | DOWN   |                                                                                                         | chr16 | 84192558  | 84197053  | 2551  |
| SPRR1A      | -0.963221425 | 3.11427E-08 | 2.67733E-07 | DOWN   | small proline rich protein 1A [Source:HGNC Symbol;Acc:HGNC:11259]                                       | chr1  | 152985231 | 152985500 | 270   |
| EMX2        | -0.75724873  | 3.25297E-08 | 2.78206E-07 | DOWN   | empty spiracles homeobox 2 [Source:HGNC Symbol;Acc:HGNC:3341]                                           | chr10 | 117542444 | 117549546 | 2897  |
| GALNT13     | -0.630416954 | 3.53286E-08 | 3.01007E-07 | DOWN   | polypeptide N-acetylgalactosaminyltransferase 13 [Source:HGNC Symbol;Acc:HGNC:23242]                    | chr2  | 153871913 | 154453849 | 5704  |
| HLA-DQA2    | 0.637477565  | 3.65838E-08 | 3.11117E-07 | UP     | major histocompatibility complex, class II, DQ alpha 2 [Source:HGNC Symbol;Acc:HGNC:4943]               | chr6  | 32741342  | 32747215  | 1524  |
| SLC6A2      | -0.816977618 | 4.6498E-08  | 3.89043E-07 | DOWN   | solute carrier family 6 member 2 [Source:HGNC Symbol;Acc:HGNC:11048]                                    | chr16 | 55655604  | 55706192  | 5364  |

| PARAM      | logFC        | pval        | pval.adj    | UPDOWN | desc                                                                                            | chr   | start     | end       | size  |
|------------|--------------|-------------|-------------|--------|-------------------------------------------------------------------------------------------------|-------|-----------|-----------|-------|
| IGSF5      | -0.59333764  | 4.7427E-08  | 3.96267E-07 | DOWN   | immunoglobulin superfamily member 5 [Source:HGNC Symbol;Acc:HGNC:5952]                          | chr21 | 39745407  | 39802096  | 2066  |
| EHF        | -0.651943702 | 4.92738E-08 | 4.09809E-07 | DOWN   | ETS homologous factor [Source:HGNC Symbol;Acc:HGNC:3246]                                        | chr11 | 34621111  | 34661057  | 3953  |
| GRM7       | -0.603658514 | 4.94245E-08 | 4.10685E-07 | DOWN   | glutamate metabotropic receptor 7 [Source:HGNC Symbol;Acc:HGNC:4599]                            | chr3  | 6861115   | 7741533   | 4296  |
| ITH3       | -0.832568902 | 5.0526E-08  | 4.18305E-07 | DOWN   | inter-alpha-trypsin inhibitor heavy chain 3 [Source:HGNC Symbol;Acc:HGNC:6168]                  | chr3  | 52794768  | 52809009  | 3047  |
| B3GALT5    | -0.690383352 | 5.10974E-08 | 4.22842E-07 | DOWN   | beta-1,3-galactosyltransferase 5 [Source:HGNC Symbol;Acc:HGNC:920]                              | chr21 | 39556442  | 39673137  | 13688 |
| TBX4       | -0.609737384 | 5.18612E-08 | 4.28771E-07 | DOWN   | T-box 4 [Source:HGNC Symbol;Acc:HGNC:11603]                                                     | chr17 | 61452418  | 61485110  | 3440  |
| CRISP3     | -0.829649221 | 5.67499E-08 | 4.65791E-07 | DOWN   | cysteine rich secretory protein 3 [Source:HGNC Symbol;Acc:HGNC:16904]                           | chr6  | 49727384  | 49744437  | 2247  |
| CAPN9      | -0.892741442 | 5.95103E-08 | 4.86685E-07 | DOWN   | calpain 9 [Source:HGNC Symbol;Acc:HGNC:1486]                                                    | chr1  | 230747384 | 230802003 | 2593  |
| ACY3       | 0.672788628  | 5.967E-08   | 4.87771E-07 | UP     | aminoacylase 3 [Source:HGNC Symbol;Acc:HGNC:24104]                                              | chr11 | 67642555  | 67650659  | 1300  |
| PNMT       | -0.621417697 | 6.16854E-08 | 5.02885E-07 | DOWN   | phenylethanolamine N-methyltransferase [Source:HGNC Symbol;Acc:HGNC:9160]                       | chr17 | 39667981  | 39670475  | 1457  |
| GPR78      | -0.751672185 | 6.90044E-08 | 5.59534E-07 | DOWN   | G protein-coupled receptor 78 [Source:HGNC Symbol;Acc:HGNC:4528]                                | chr4  | 8580566   | 8587548   | 1694  |
| OR5P2      | -0.722729566 | 7.3003E-08  | 5.88536E-07 | DOWN   | olfactory receptor family 5 subfamily P member 2 [Source:HGNC Symbol;Acc:HGNC:14783]            | chr11 | 7795905   | 7796973   | 1069  |
| TFAP2B     | -0.844274353 | 7.40288E-08 | 5.96275E-07 | DOWN   | transcription factor AP-2 beta [Source:HGNC Symbol;Acc:HGNC:11743]                              | chr6  | 50818723  | 50847613  | 5773  |
| PDZK1IP1   | 0.912283152  | 7.463E-08   | 6.00851E-07 | UP     | PDZK1 interacting protein 1 [Source:HGNC Symbol;Acc:HGNC:16887]                                 | chr1  | 47183593  | 47191044  | 1191  |
| NDNF       | -0.62249968  | 8.04147E-08 | 6.43993E-07 | DOWN   | neuron derived neurotrophic factor [Source:HGNC Symbol;Acc:HGNC:26256]                          | chr4  | 121035613 | 121072518 | 2885  |
| RERGL      | -0.59243379  | 8.64896E-08 | 6.88386E-07 | DOWN   | RERG like [Source:HGNC Symbol;Acc:HGNC:26213]                                                   | chr12 | 18080869  | 18090193  | 1147  |
| SFRP1      | -0.674198831 | 8.78463E-08 | 6.97653E-07 | DOWN   | secreted frizzled related protein 1 [Source:HGNC Symbol;Acc:HGNC:10776]                         | chr8  | 41261958  | 41309497  | 4761  |
| PVALB      | -0.785920693 | 8.95214E-08 | 7.09092E-07 | DOWN   | parvalbumin [Source:HGNC Symbol;Acc:HGNC:9704]                                                  | chr22 | 36800684  | 36819479  | 645   |
| PLA2G2A    | -0.736326101 | 9.19884E-08 | 7.27046E-07 | DOWN   | phospholipase A2 group IIA [Source:HGNC Symbol;Acc:HGNC:9031]                                   | chr1  | 19975432  | 19980416  | 1029  |
| HOXA13     | -0.606280047 | 9.42783E-08 | 7.4417E-07  | DOWN   | homeobox A13 [Source:HGNC Symbol;Acc:HGNC:5102]                                                 | chr7  | 27194364  | 27200106  | 5030  |
| EGFEM1P    | -0.597158279 | 1.03367E-07 | 8.09568E-07 | DOWN   | EGF like and EMI domain containing 1, pseudogene [Source:HGNC Symbol;Acc:HGNC:25149]            | chr3  | 168249522 | 16830599  | 3757  |
| TMEM59L    | -0.641410688 | 1.0429E-07  | 8.15388E-07 | DOWN   | transmembrane protein 59 like [Source:HGNC Symbol;Acc:HGNC:13237]                               | chr19 | 18607430  | 18621039  | 1717  |
| HLA-V      | 0.643942953  | 1.06542E-07 | 8.32273E-07 | UP     | major histocompatibility complex, class I, V (pseudogene) [Source:HGNC Symbol;Acc:HGNC:23482]   | chr6  | 29790954  | 29797811  | 5662  |
| CCL18      | 0.58999476   | 1.09382E-07 | 8.52261E-07 | UP     | C-C motif chemokine ligand 18 [Source:HGNC Symbol;Acc:HGNC:10616]                               | chr17 | 36064280  | 36072032  | 1324  |
| HPGD       | -0.685398117 | 1.13357E-07 | 8.80582E-07 | DOWN   | hydroxyprostaglandin dehydrogenase 15-(NAD) [Source:HGNC Symbol;Acc:HGNC:5154]                  | chr4  | 174490177 | 174523065 | 4635  |
| CCDC181    | -0.592421435 | 1.17838E-07 | 9.11094E-07 | DOWN   | coiled-coil domain containing 181 [Source:HGNC Symbol;Acc:HGNC:28051]                           | chr1  | 169394870 | 169460669 | 2629  |
| CST6       | -0.670969134 | 1.24421E-07 | 9.56283E-07 | DOWN   | cystatin E/M [Source:HGNC Symbol;Acc:HGNC:2478]                                                 | chr11 | 66011841  | 66013505  | 759   |
| HS6ST3     | -0.719894516 | 1.27203E-07 | 9.756E-07   | DOWN   | heparan sulfate 6-O-sulfotransferase 3 [Source:HGNC Symbol;Acc:HGNC:19134]                      | chr13 | 96090839  | 96839562  | 7806  |
| IGLV5-45   | 0.749923238  | 1.29278E-07 | 9.90258E-07 | UP     | immunoglobulin lambda variable 5-45 [Source:HGNC Symbol;Acc:HGNC:5924]                          | chr22 | 22375986  | 22376505  | 397   |
| HSPB6      | -0.672336937 | 1.4275E-07  | 1.08384E-06 | DOWN   | heat shock protein family B (small) member 6 [Source:HGNC Symbol;Acc:HGNC:26511]                | chr19 | 35754569  | 35757029  | 1545  |
| IGHV2-70   | 0.728948914  | 1.45117E-07 | 1.10089E-06 | UP     | immunoglobulin heavy variable 2-70 [Source:HGNC Symbol;Acc:HGNC:5577]                           | chr14 | 106770577 | 106771020 | 358   |
| PADI1      | -0.806550184 | 1.47592E-07 | 1.11592E-06 | DOWN   | peptidyl arginine deiminase 1 [Source:HGNC Symbol;Acc:HGNC:18367]                               | chr1  | 17205126  | 17246005  | 3846  |
| TCEAL2     | -0.675156782 | 1.65862E-07 | 1.24215E-06 | DOWN   | transcription elongation factor A like 2 [Source:HGNC Symbol;Acc:HGNC:29818]                    | chrX  | 102125688 | 102127711 | 1100  |
| AC245369.1 | 0.727634949  | 1.6606E-07  | 1.24312E-06 | UP     |                                                                                                 | chr14 | 106723574 | 106724093 | 434   |
| AC010328.1 | -0.63622468  | 1.671E-07   | 1.24969E-06 | DOWN   |                                                                                                 | chr19 | 53007512  | 53013180  | 4060  |
| ADGRF1     | -0.748728969 | 1.7732E-07  | 1.31816E-06 | DOWN   | adhesion G protein-coupled receptor F1 [Source:HGNC Symbol;Acc:HGNC:18990]                      | chr6  | 46997703  | 47042363  | 6100  |
| ZNF728     | -0.60630272  | 1.8618E-07  | 1.37781E-06 | DOWN   | zinc finger protein 728 [Source:HGNC Symbol;Acc:HGNC:32463]                                     | chr19 | 22975468  | 23003176  | 2015  |
| COLEC10    | -0.611144756 | 1.866E-07   | 1.37979E-06 | DOWN   | collectin subfamily member 10 [Source:HGNC Symbol;Acc:HGNC:2220]                                | chr8  | 119067241 | 119106582 | 1266  |
| CCL7       | 0.620247576  | 1.8696E-07  | 1.38189E-06 | UP     | C-C motif chemokine ligand 7 [Source:HGNC Symbol;Acc:HGNC:10634]                                | chr17 | 34270221  | 34272242  | 863   |
| KCNH2      | -0.58725927  | 1.90832E-07 | 1.40707E-06 | DOWN   | potassium voltage-gated channel subfamily H member 2 [Source:HGNC Symbol;Acc:HGNC:6251]         | chr7  | 150944961 | 150978315 | 5066  |
| KIAA1210   | -0.6575387   | 1.97954E-07 | 1.45485E-06 | DOWN   | KIAA1210 [Source:HGNC Symbol;Acc:HGNC:29218]                                                    | chrX  | 119078635 | 119150579 | 7824  |
| POU5F1     | -0.615151782 | 1.98873E-07 | 1.45923E-06 | DOWN   | POU class 5 homeobox 1 [Source:HGNC Symbol;Acc:HGNC:9221]                                       | chr6  | 31164337  | 31180731  | 2896  |
| BHMT       | -0.98500818  | 2.09682E-07 | 1.53296E-06 | DOWN   | betaine-homocysteine S-methyltransferase [Source:HGNC Symbol;Acc:HGNC:1047]                     | chr5  | 79111779  | 79132290  | 2502  |
| OR5P1P     | -0.624521205 | 2.11311E-07 | 1.54301E-06 | DOWN   | olfactory receptor family 5 subfamily P member 1 pseudogene [Source:HGNC Symbol;Acc:HGNC:14779] | chr11 | 7772890   | 7773814   | 925   |
| MRAP2      | -0.618981734 | 2.11509E-07 | 1.54383E-06 | DOWN   | melanocortin 2 receptor accessory protein 2 [Source:HGNC Symbol;Acc:HGNC:21232]                 | chr6  | 84033756  | 84090881  | 2153  |
| VWASB1     | -0.783441095 | 2.12815E-07 | 1.55087E-06 | DOWN   | von Willebrand factor A domain containing 5B1 [Source:HGNC Symbol;Acc:HGNC:26538]               | chr1  | 20290919  | 20354894  | 4493  |
| SLC44A4    | -0.758152339 | 2.14042E-07 | 1.55918E-06 | DOWN   | solute carrier family 44 member 4 [Source:HGNC Symbol;Acc:HGNC:13941]                           | chr6  | 31863192  | 31879046  | 2743  |
| SLC6A11    | -0.794100394 | 2.25419E-07 | 1.63942E-06 | DOWN   | solute carrier family 6 member 11 [Source:HGNC Symbol;Acc:HGNC:11044]                           | chr3  | 10816200  | 10940733  | 6402  |
| MELTF      | 0.585075791  | 2.40276E-07 | 1.73563E-06 | UP     | melanotransferrin [Source:HGNC Symbol;Acc:HGNC:7037]                                            | chr3  | 197001740 | 197029816 | 4812  |
| TMPPRS3    | 0.587390706  | 2.60784E-07 | 1.86962E-06 | UP     | transmembrane protease, serine 3 [Source:HGNC Symbol;Acc:HGNC:11877]                            | chr21 | 42371890  | 42396846  | 3855  |
| PRND       | -0.658589873 | 2.7088E-07  | 1.93741E-06 | DOWN   | prion like protein doppel [Source:HGNC Symbol;Acc:HGNC:15748]                                   | chr20 | 4721910   | 4728460   | 3980  |
| CYP4F12    | -0.625819172 | 2.73825E-07 | 1.95692E-06 | DOWN   | cytochrome P450 family 4 subfamily F member 12 [Source:HGNC Symbol;Acc:HGNC:18857]              | chr19 | 15672757  | 15697174  | 2095  |
| PDZD3      | -0.701219208 | 2.78466E-07 | 1.98696E-06 | DOWN   | PDZ domain containing 3 [Source:HGNC Symbol;Acc:HGNC:19891]                                     | chr11 | 119185475 | 119190223 | 2996  |
| IGLV2-5    | 0.604333957  | 2.81791E-07 | 2.00832E-06 | UP     | immunoglobulin lambda variable 2-5 (pseudogene) [Source:HGNC Symbol;Acc:HGNC:5894]              | chr22 | 22856762  | 22857038  | 277   |
| RANBP3L    | -0.685981917 | 3.00057E-07 | 2.11769E-06 | DOWN   | RAN binding protein 3 like [Source:HGNC Symbol;Acc:HGNC:26353]                                  | chr5  | 36248434  | 36301902  | 3324  |
| SULT1E1    | -0.811203761 | 3.00922E-07 | 2.12131E-06 | DOWN   | sulfotransferase family 1E member 1 [Source:HGNC Symbol;Acc:HGNC:11377]                         | chr4  | 69841212  | 69860152  | 1780  |

| PARAM      | logFC        | pval        | pval.adj    | UPDOWN | desc                                                                                                 | chr        | start     | end       | size  |
|------------|--------------|-------------|-------------|--------|------------------------------------------------------------------------------------------------------|------------|-----------|-----------|-------|
| DMBX1      | -0.656450279 | 3.17478E-07 | 2.22744E-06 | DOWN   | diencephalon/mesencephalon homeobox 1 [Source:HGNC Symbol;Acc:HGNC:19026]                            | chr1       | 46506996  | 46514226  | 2896  |
| AL136981.1 | -0.646128275 | 3.4474E-07  | 2.40034E-06 | DOWN   |                                                                                                      | chr9       | 92882567  | 92899608  | 4230  |
| TRPV6      | -0.698794975 | 3.48893E-07 | 2.42646E-06 | DOWN   | transient receptor potential cation channel subfamily V member 6 [Source:HGNC Symbol;Acc:HGNC:14006] | chr7       | 142871203 | 142885762 | 2928  |
| CRTA1C     | -0.8535962   | 3.60176E-07 | 2.49727E-06 | DOWN   | cartilage acidic protein 1 [Source:HGNC Symbol;Acc:HGNC:14882]                                       | chr10      | 97865000  | 98030828  | 3063  |
| MROH2A     | -0.742040415 | 3.77486E-07 | 2.60434E-06 | DOWN   | maestro heat like repeat family member 2A [Source:HGNC Symbol;Acc:HGNC:27936]                        | chr2       | 233775679 | 233833423 | 5502  |
| PI16       | -0.657127953 | 3.96244E-07 | 2.71823E-06 | DOWN   | peptidase inhibitor 16 [Source:HGNC Symbol;Acc:HGNC:21245]                                           | chr6       | 36948263  | 36964837  | 2332  |
| CAPN8      | -0.922370523 | 4.06052E-07 | 2.77921E-06 | DOWN   | calpain 8 [Source:HGNC Symbol;Acc:HGNC:1485]                                                         | chr1       | 223541609 | 223665734 | 3811  |
| NPYSR      | -0.591024232 | 4.14261E-07 | 2.83326E-06 | DOWN   | neuropeptide Y receptor Y5 [Source:HGNC Symbol;Acc:HGNC:7958]                                        | chr4       | 163343939 | 163351934 | 3291  |
| MSMB       | -0.938318177 | 4.32367E-07 | 2.94598E-06 | DOWN   | microseminoprotein beta [Source:HGNC Symbol;Acc:HGNC:7372]                                           | chr10      | 46033307  | 46046269  | 492   |
| SYT8       | -0.679992763 | 4.7551E-07  | 3.22057E-06 | DOWN   | synaptotagmin 8 [Source:HGNC Symbol;Acc:HGNC:19264]                                                  | chr11      | 1834444   | 1837521   | 1714  |
| ZNF676     | -0.618881041 | 5.63057E-07 | 3.76986E-06 | DOWN   | zinc finger protein 676 [Source:HGNC Symbol;Acc:HGNC:20429]                                          | chr19      | 22179091  | 22196951  | 2944  |
| KRT81      | 0.725728651  | 5.87623E-07 | 3.91987E-06 | UP     | keratin 81 [Source:HGNC Symbol;Acc:HGNC:6458]                                                        | chr12      | 52285913  | 52291534  | 1929  |
| ANKFN1     | -0.624037364 | 6.04509E-07 | 4.01625E-06 | DOWN   | ankyrin repeat and fibronectin type III domain containing 1 [Source:HGNC Symbol;Acc:HGNC:26766]      | chr17      | 56153475  | 56511659  | 3997  |
| LG1        | -0.602888178 | 6.21135E-07 | 4.12369E-06 | DOWN   | leucine rich glioma inactivated 1 [Source:HGNC Symbol;Acc:HGNC:6572]                                 | chr10      | 93757809  | 93806134  | 5578  |
| SLC7A4     | -0.636159552 | 6.26818E-07 | 4.1523E-06  | DOWN   | solute carrier family 7 member 4 [Source:HGNC Symbol;Acc:HGNC:11062]                                 | chr22      | 21028718  | 21032558  | 2316  |
| CA4        | -0.663615286 | 6.32144E-07 | 4.18452E-06 | DOWN   | carbonic anhydrase 4 [Source:HGNC Symbol;Acc:HGNC:1375]                                              | chr17      | 60149936  | 60159540  | 1154  |
| NPC1L1     | -0.638217826 | 6.427E-07   | 4.24796E-06 | DOWN   | NPC1 like intracellular cholesterol transporter 1 [Source:HGNC Symbol;Acc:HGNC:7898]                 | chr7       | 44512535  | 44541315  | 5252  |
| HIF3A      | -0.600819757 | 6.43275E-07 | 4.2489E-06  | DOWN   | hypoxia inducible factor 3 alpha subunit [Source:HGNC Symbol;Acc:HGNC:15825]                         | chr19      | 46297046  | 46343433  | 6427  |
| XPNPPE2    | -0.649933689 | 6.45029E-07 | 4.25738E-06 | DOWN   | X-prolyl aminopeptidase 2 [Source:HGNC Symbol;Acc:HGNC:12823]                                        | chrX       | 129738974 | 129769538 | 3500  |
| IGLV3-19   | 0.671619766  | 6.62482E-07 | 4.36305E-06 | UP     | immunoglobulin lambda variable 3-19 [Source:HGNC Symbol;Acc:HGNC:5903]                               | chr22      | 22720623  | 22721145  | 377   |
| AKR1C1     | -0.632849094 | 6.68036E-07 | 4.39165E-06 | DOWN   | aldo-keto reductase family 1 member C1 [Source:HGNC Symbol;Acc:HGNC:384]                             | chr10      | 4963253   | 4983283   | 7077  |
| GFR3A      | -0.598653137 | 7.19243E-07 | 4.7027E-06  | DOWN   | GDNF family receptor alpha 3 [Source:HGNC Symbol;Acc:HGNC:4245]                                      | chr5       | 138252379 | 138274671 | 2039  |
| TBL1Y      | -0.901682375 | 7.45848E-07 | 4.86438E-06 | DOWN   | transducin beta like 1, Y-linked [Source:HGNC Symbol;Acc:HGNC:18502]                                 | chrY       | 6910686   | 7091683   | 2407  |
| IGHV3-23   | 0.665212976  | 8.10247E-07 | 5.25414E-06 | UP     | immunoglobulin heavy variable 3-23 [Source:HGNC Symbol;Acc:HGNC:5588]                                | chr14      | 106268606 | 106269140 | 432   |
| FRRS1L     | -0.59868123  | 8.43201E-07 | 5.44641E-06 | DOWN   | ferric chelate reductase 1 like [Source:HGNC Symbol;Acc:HGNC:1362]                                   | chr9       | 109130293 | 109167291 | 8197  |
| PROM1      | -0.839975938 | 8.55006E-07 | 5.51284E-06 | DOWN   | prominin 1 [Source:HGNC Symbol;Acc:HGNC:9454]                                                        | chr4       | 15968226  | 16084378  | 4446  |
| UGT1A13P   | -0.823472805 | 8.6513E-07  | 5.57415E-06 | DOWN   | UDP glucuronosyltransferase family 1 member A13, pseudogene [Source:HGNC Symbol;Acc:HGNC:32191]      | chr2       | 233647926 | 233649026 | 762   |
| UGT1A10    | -0.929171303 | 8.68615E-07 | 5.59263E-06 | DOWN   | UDP glucuronosyltransferase family 1 member A10 [Source:HGNC Symbol;Acc:HGNC:12531]                  | chr2       | 233636454 | 233773305 | 3157  |
| BNC1       | 0.957722289  | 9.22777E-07 | 5.90362E-06 | UP     | basonuclin 1 [Source:HGNC Symbol;Acc:HGNC:1081]                                                      | chr15      | 83255903  | 83284714  | 4795  |
| AC245369.7 | 0.623805989  | 9.27904E-07 | 5.93224E-06 | UP     |                                                                                                      | chr14      | 106728163 | 106728615 | 350   |
| AGT        | -0.585003724 | 9.47659E-07 | 6.03667E-06 | DOWN   | angiotensinogen [Source:HGNC Symbol;Acc:HGNC:333]                                                    | chr1       | 230702523 | 230714297 | 2291  |
| ADH1B      | -0.790877646 | 1.1017E-06  | 6.91895E-06 | DOWN   | alcohol dehydrogenase 1B (class I), beta polypeptide [Source:HGNC Symbol;Acc:HGNC:250]               | chr4       | 99304964  | 99352760  | 4299  |
| NELL1      | -0.796825195 | 1.11242E-06 | 6.98143E-06 | DOWN   | neural EGFL like 1 [Source:HGNC Symbol;Acc:HGNC:7750]                                                | chr11      | 20669551  | 21575681  | 3349  |
| NPAP1      | -0.705032533 | 1.1648E-06  | 7.26735E-06 | DOWN   | nuclear pore associated protein 1 [Source:HGNC Symbol;Acc:HGNC:1190]                                 | chr15      | 24675868  | 24683393  | 7526  |
| PAX6       | 0.837788767  | 1.16595E-06 | 7.27207E-06 | UP     | paired box 6 [Source:HGNC Symbol;Acc:HGNC:8620]                                                      | chr11      | 31784779  | 31818062  | 11321 |
| MISP       | -0.667331309 | 1.1668E-06  | 7.27484E-06 | DOWN   | mitotic spindle positioning [Source:HGNC Symbol;Acc:HGNC:27000]                                      | chr19      | 751126    | 764318    | 2871  |
| GPR37      | 0.620586478  | 1.17411E-06 | 7.31793E-06 | UP     | G protein-coupled receptor 37 [Source:HGNC Symbol;Acc:HGNC:4494]                                     | chr7       | 124745997 | 124765627 | 3021  |
| LHX2       | 0.595208442  | 1.21726E-06 | 7.56607E-06 | UP     | LIM homeobox 2 [Source:HGNC Symbol;Acc:HGNC:6594]                                                    | chr9       | 124011610 | 124033301 | 2554  |
| IGHV5-51   | 0.644714253  | 1.26883E-06 | 7.87038E-06 | UP     | immunoglobulin heavy variable 5-51 [Source:HGNC Symbol;Acc:HGNC:5659]                                | chr14      | 106578744 | 106579236 | 410   |
| FAM3D      | -0.778003837 | 1.42012E-06 | 8.72525E-06 | DOWN   | family with sequence similarity 3 member D [Source:HGNC Symbol;Acc:HGNC:18665]                       | chr3       | 58633946  | 58666848  | 1319  |
| ABCC8      | -0.725911718 | 1.48475E-06 | 9.07926E-06 | DOWN   | ATP binding cassette subfamily C member 8 [Source:HGNC Symbol;Acc:HGNC:59]                           | chr11      | 17392885  | 17476845  | 4924  |
| IGHV3-33   | 0.624269355  | 1.4986E-06  | 9.15158E-06 | UP     | immunoglobulin heavy variable 3-33 [Source:HGNC Symbol;Acc:HGNC:6128]                                | chr14      | 106359793 | 106360324 | 431   |
| GSTM2P1    | -0.601540151 | 1.51738E-06 | 9.24763E-06 | DOWN   | glutathione S-transferase mu 2 pseudogene 1 [Source:HGNC Symbol;Acc:HGNC:38009]                      | chr6       | 111046868 | 111047521 | 654   |
| ERN2       | -0.920566369 | 1.51998E-06 | 9.2572E-06  | DOWN   | endoplasmic reticulum to nucleus signaling 2 [Source:HGNC Symbol;Acc:HGNC:16942]                     | chr16      | 23690326  | 23713500  | 3599  |
| IRS4       | -0.730936731 | 1.5237E-06  | 9.27364E-06 | DOWN   | insulin receptor substrate 4 [Source:HGNC Symbol;Acc:HGNC:6128]                                      | chrX       | 108732482 | 108736409 | 3928  |
| AC233755.1 | 0.640830497  | 1.61999E-06 | 9.7907E-06  | UP     | Immunoglobulin heavy variable 4-38-2 [Source:UniProtKB/Swiss-Prot;Acc:P0DP08]                        | K1270726.1 | 41444     | 41876     | 351   |
| ST6GALNAC1 | -0.725463108 | 1.71328E-06 | 1.02927E-05 | DOWN   | ST6 N-acetylgalactosaminide alpha-2,6-sialyltransferase 1 [Source:HGNC Symbol;Acc:HGNC:23614]        | chr17      | 76624763  | 76643838  | 2836  |
| IGHV4-39   | 0.67618952   | 1.71949E-06 | 1.03266E-05 | UP     | Immunoglobulin heavy variable 4-39 [Source:HGNC Symbol;Acc:HGNC:5651]                                | chr14      | 106421711 | 106422218 | 425   |
| VIT        | -0.638965009 | 1.826E-06   | 1.08977E-05 | DOWN   | vitrin [Source:HGNC Symbol;Acc:HGNC:12697]                                                           | chr2       | 36696690  | 36814792  | 3444  |
| SLC38A4    | -0.739343755 | 1.83946E-06 | 1.096E-05   | DOWN   | solute carrier family 38 member 4 [Source:HGNC Symbol;Acc:HGNC:14679]                                | chr12      | 46764761  | 46825997  | 3983  |
| FUT6       | -0.860011809 | 1.85576E-06 | 1.1039E-05  | DOWN   | fucosyltransferase 6 [Source:HGNC Symbol;Acc:HGNC:4017]                                              | chr19      | 5830610   | 5839731   | 3198  |
| OMD        | -0.636567698 | 1.87017E-06 | 1.11137E-05 | DOWN   | osteomodulin [Source:HGNC Symbol;Acc:HGNC:8134]                                                      | chr9       | 92414245  | 92424461  | 2449  |
| STXBPSL    | -0.717138409 | 1.90554E-06 | 1.1298E-05  | DOWN   | syntaxin binding protein 5 like [Source:HGNC Symbol;Acc:HGNC:30757]                                  | chr3       | 120908072 | 121424761 | 9654  |
| POPCD3     | 0.665338373  | 1.91285E-06 | 1.13338E-05 | UP     | popeye domain containing 3 [Source:HGNC Symbol;Acc:HGNC:17649]                                       | chr6       | 105158280 | 105179860 | 1345  |
| IGHV3-20   | 0.723010322  | 1.91345E-06 | 1.13338E-05 | UP     | Immunoglobulin heavy variable 3-20 [Source:HGNC Symbol;Acc:HGNC:5585]                                | chr14      | 106210936 | 106211453 | 415   |
| SHH        | -0.782576804 | 1.91694E-06 | 1.13471E-05 | DOWN   | sonic hedgehog [Source:HGNC Symbol;Acc:HGNC:10848]                                                   | chr7       | 155799986 | 155812273 | 4454  |

| PARAM      | logFC        | pval        | pval.adj    | UPDOWN | desc                                                                                                 | chr        | start     | end       | size  |
|------------|--------------|-------------|-------------|--------|------------------------------------------------------------------------------------------------------|------------|-----------|-----------|-------|
| CFAP47     | -0.695269679 | 1.92156E-06 | 1.13707E-05 | DOWN   | cilia and flagella associated protein 47 [Source:HGNC Symbol;Acc:HGNC:26708]                         | chrX       | 35919734  | 36385319  | 10890 |
| OR5P3      | -0.594640219 | 1.98031E-06 | 1.16764E-05 | DOWN   | olfactory receptor family 5 subfamily P member 3 [Source:HGNC Symbol;Acc:HGNC:14784]                 | chr11      | 7824818   | 7830840   | 1193  |
| OVCH2      | -0.593735142 | 1.99912E-06 | 1.17759E-05 | DOWN   | ovochoyase 2 (gene/pseudogene) [Source:HGNC Symbol;Acc:HGNC:29970]                                   | chr11      | 7689438   | 7706421   | 1922  |
| IGKV3-15   | 0.611146032  | 2.08992E-06 | 1.22549E-05 | UP     | immunoglobulin kappa variable 3-15 [Source:HGNC Symbol;Acc:HGNC:5816]                                | chr2       | 89085177  | 89085787  | 442   |
| IGLV2-14   | 0.644407917  | 2.10719E-06 | 1.23442E-05 | UP     | immunoglobulin lambda variable 2-14 [Source:HGNC Symbol;Acc:HGNC:5888]                               | chr22      | 22758700  | 22759218  | 402   |
| IGKV1-27   | 0.665732081  | 2.17413E-06 | 1.27118E-05 | UP     | immunoglobulin kappa variable 1-27 [Source:HGNC Symbol;Acc:HGNC:5735]                                | chr2       | 89213423  | 89213928  | 382   |
| AGKP1      | -0.60211138  | 2.20857E-06 | 1.28923E-05 | DOWN   | acylglycerol kinase pseudogene 1 [Source:HGNC Symbol;Acc:HGNC:37661]                                 | chrY       | 14639096  | 14640358  | 1263  |
| CAPN6      | -0.675696043 | 2.23233E-06 | 1.30185E-05 | DOWN   | calpain 6 [Source:HGNC Symbol;Acc:HGNC:1483]                                                         | chrX       | 111245103 | 111270523 | 3568  |
| IGHV1-69   | 0.658581229  | 2.23512E-06 | 1.30305E-05 | UP     | immunoglobulin heavy variable 1-69 [Source:HGNC Symbol;Acc:HGNC:5558]                                | chr14      | 106714684 | 106715181 | 412   |
| COL9A1     | -0.687464539 | 2.42124E-06 | 1.4003E-05  | DOWN   | collagen type IX alpha 1 chain [Source:HGNC Symbol;Acc:HGNC:2217]                                    | chr6       | 70215061  | 70303083  | 5241  |
| NPTX1      | -0.634216693 | 2.44402E-06 | 1.41257E-05 | DOWN   | neuronal pentraxin 1 [Source:HGNC Symbol;Acc:HGNC:7952]                                              | chr17      | 80467148  | 80476604  | 5122  |
| KCNH8      | -0.626189979 | 2.45021E-06 | 1.4157E-05  | DOWN   | potassium voltage-gated channel subfamily H member 8 [Source:HGNC Symbol;Acc:HGNC:18864]             | chr3       | 19148454  | 19535646  | 5137  |
| TFF3       | -0.941546643 | 2.46876E-06 | 1.42461E-05 | DOWN   | trefoil factor 3 [Source:HGNC Symbol;Acc:HGNC:11757]                                                 | chr21      | 42311667  | 42315651  | 1113  |
| IGLV3-9    | 0.684232715  | 2.47518E-06 | 1.42572E-05 | UP     | immunoglobulin lambda variable 3-9 (gene/pseudogene) [Source:HGNC Symbol;Acc:HGNC:5918]              | chr22      | 22819010  | 22819756  | 461   |
| NLGN4Y     | -0.950142111 | 2.51148E-06 | 1.44374E-05 | DOWN   | neuroligin 4, Y-linked [Source:HGNC Symbol;Acc:HGNC:15529]                                           | chrY       | 14523746  | 14843726  | 5338  |
| UGT2B15    | -0.849242749 | 2.70071E-06 | 1.54274E-05 | DOWN   | UDP glucuronosyltransferase family 2 member B15 [Source:HGNC Symbol;Acc:HGNC:12546]                  | chr4       | 68646630  | 68670628  | 2077  |
| CLDN8      | -0.652788959 | 2.7465E-06  | 1.56545E-05 | DOWN   | claudin 8 [Source:HGNC Symbol;Acc:HGNC:2050]                                                         | chr21      | 30214006  | 30216073  | 2068  |
| AC233755.2 | 0.675441674  | 2.81376E-06 | 1.60026E-05 | UP     |                                                                                                      | K1270726.1 | 26241     | 26534     | 294   |
| IGHM       | 0.602256597  | 2.97177E-06 | 1.68326E-05 | UP     | immunoglobulin heavy constant mu [Source:HGNC Symbol;Acc:HGNC:5541]                                  | chr14      | 105851708 | 105856218 | 1683  |
| PPP1R1B    | -0.817974783 | 3.29532E-06 | 1.85264E-05 | DOWN   | protein phosphatase 1 regulatory inhibitor subunit 1B [Source:HGNC Symbol;Acc:HGNC:9287]             | chr17      | 39626740  | 39636626  | 2238  |
| FGF14      | -0.588325238 | 3.50314E-06 | 1.95552E-05 | DOWN   | fibroblast growth factor 14 [Source:HGNC Symbol;Acc:HGNC:3671]                                       | chr13      | 101710804 | 102401774 | 13075 |
| CYP3A5     | -0.655862599 | 3.80587E-06 | 2.10507E-05 | DOWN   | cytochrome P450 family 3 subfamily A member 5 [Source:HGNC Symbol;Acc:HGNC:2638]                     | chr7       | 99648194  | 99679998  | 3983  |
| KRT12      | -0.628360324 | 4.01833E-06 | 2.20777E-05 | DOWN   | keratin 12 [Source:HGNC Symbol;Acc:HGNC:6414]                                                        | chr17      | 40861303  | 40867210  | 1867  |
| IGLV3-10   | 0.658451567  | 4.31616E-06 | 2.35712E-05 | UP     | immunoglobulin lambda variable 3-10 [Source:HGNC Symbol;Acc:HGNC:5897]                               | chr22      | 22811747  | 22812281  | 382   |
| IGHV1-18   | 0.634006658  | 4.4288E-06  | 2.4119E-05  | UP     | immunoglobulin heavy variable 1-18 [Source:HGNC Symbol;Acc:HGNC:5549]                                | chr14      | 106184901 | 106185394 | 410   |
| IGLV2-23   | 0.613428947  | 4.62316E-06 | 2.51041E-05 | UP     | immunoglobulin lambda variable 2-23 [Source:HGNC Symbol;Acc:HGNC:5890]                               | chr22      | 22697789  | 22698407  | 502   |
| IGHV4-28   | 0.611567801  | 4.67283E-06 | 2.53662E-05 | UP     | immunoglobulin heavy variable 4-28 [Source:HGNC Symbol;Acc:HGNC:5645]                                | chr14      | 106324254 | 106324760 | 425   |
| AL772284.1 | 0.615883405  | 4.85835E-06 | 2.62945E-05 | UP     |                                                                                                      | chrX       | 118938153 | 118939134 | 905   |
| PKHD1      | -0.687604995 | 4.94505E-06 | 2.67159E-05 | DOWN   | PKHD1, fibrocystin/polyductin [Source:HGNC Symbol;Acc:HGNC:9016]                                     | chr6       | 51615300  | 52087625  | 17454 |
| ASB5       | -0.591114176 | 5.21188E-06 | 2.80073E-05 | DOWN   | ankyrin repeat and SOCS box containing 5 [Source:HGNC Symbol;Acc:HGNC:17180]                         | chr4       | 176213673 | 176269222 | 3246  |
| NEFM       | -0.679244874 | 5.36786E-06 | 2.87678E-05 | DOWN   | neurofilament medium [Source:HGNC Symbol;Acc:HGNC:7734]                                              | chr8       | 24913012  | 24919098  | 4381  |
| TRIM15     | 0.668127572  | 5.42097E-06 | 2.90277E-05 | UP     | tripartite motif containing 15 [Source:HGNC Symbol;Acc:HGNC:16284]                                   | chr6       | 30163206  | 30172696  | 2238  |
| AC247036.4 | 0.660065168  | 5.54654E-06 | 2.96039E-05 | UP     |                                                                                                      | chr14      | 106088122 | 106088573 | 353   |
| BMP7       | -0.659596884 | 5.58729E-06 | 2.97863E-05 | DOWN   | bone morphogenetic protein 7 [Source:HGNC Symbol;Acc:HGNC:1074]                                      | chr20      | 57168748  | 57266629  | 4218  |
| NKAIN2     | -0.594945951 | 6.08166E-06 | 3.21758E-05 | DOWN   | sodium/potassium transporting ATPase interacting 2 [Source:HGNC Symbol;Acc:HGNC:16443]               | chr6       | 12380414  | 124825657 | 3796  |
| SFRP4      | -0.608578151 | 6.10421E-06 | 3.22763E-05 | DOWN   | secreted frizzled related protein 4 [Source:HGNC Symbol;Acc:HGNC:10778]                              | chr7       | 37905932  | 37916915  | 2966  |
| FRMPD2     | -0.628138828 | 6.26968E-06 | 3.30837E-05 | DOWN   | FERM and PDZ domain containing 2 [Source:HGNC Symbol;Acc:HGNC:28572]                                 | chr10      | 48155673  | 48274870  | 5376  |
| IGHV2-26   | 0.654612044  | 6.79443E-06 | 3.56143E-05 | UP     | immunoglobulin heavy variable 2-26 [Source:HGNC Symbol;Acc:HGNC:5575]                                | chr14      | 106301396 | 106301862 | 381   |
| SFRP2      | -0.605645546 | 6.914E-06   | 3.61583E-05 | DOWN   | secreted frizzled related protein 2 [Source:HGNC Symbol;Acc:HGNC:10777]                              | chr4       | 153780592 | 153789120 | 2032  |
| SLC39A2    | -0.588344216 | 7.36117E-06 | 3.82313E-05 | DOWN   | solute carrier family 39 member 2 [Source:HGNC Symbol;Acc:HGNC:17127]                                | chr14      | 20999255  | 21001871  | 1414  |
| IGLV5-37   | 0.61984754   | 7.59949E-06 | 3.93176E-05 | UP     | immunoglobulin lambda variable 5-37 [Source:HGNC Symbol;Acc:HGNC:5922]                               | chr22      | 22427540  | 22428035  | 374   |
| DACT2      | -0.628630719 | 7.97174E-06 | 4.09914E-05 | DOWN   | dishevelled binding antagonist of beta catenin 2 [Source:HGNC Symbol;Acc:HGNC:12331]                 | chr6       | 168292830 | 168319754 | 4223  |
| PLP1       | -0.622927979 | 8.46229E-06 | 4.3244E-05  | DOWN   | proteolipid protein 1 [Source:HGNC Symbol;Acc:HGNC:9086]                                             | chrX       | 103776511 | 103792619 | 3138  |
| NRXN1      | -0.594571101 | 9.76122E-06 | 4.93257E-05 | DOWN   | neurexin 1 [Source:HGNC Symbol;Acc:HGNC:8008]                                                        | chr2       | 49918505  | 51032561  | 15442 |
| IGLV4-69   | 0.592949853  | 1.13015E-05 | 5.62624E-05 | UP     | immunoglobulin lambda variable 4-69 [Source:HGNC Symbol;Acc:HGNC:5921]                               | chr22      | 22030934  | 22031472  | 419   |
| SLC1A7     | -0.588151957 | 1.13388E-05 | 5.64018E-05 | DOWN   | solute carrier family 1 member 7 [Source:HGNC Symbol;Acc:HGNC:10945]                                 | chr1       | 53087179  | 53142632  | 4730  |
| KIF1A      | -0.850527317 | 1.2542E-05  | 6.19109E-05 | DOWN   | kinesin family member 1A [Source:HGNC Symbol;Acc:HGNC:888]                                           | chr2       | 240713764 | 240820308 | 9223  |
| SERPIND1   | -0.855776045 | 1.34449E-05 | 6.58659E-05 | DOWN   | serpin family D member 1 [Source:HGNC Symbol;Acc:HGNC:4838]                                          | chr22      | 20773879  | 20787720  | 2553  |
| DIO1       | -0.634281299 | 1.45317E-05 | 7.05233E-05 | DOWN   | iodothyronine deiodinase 1 [Source:HGNC Symbol;Acc:HGNC:2883]                                        | chr1       | 53894187  | 53911086  | 1861  |
| DIRAS2     | -0.590736634 | 1.45538E-05 | 7.06116E-05 | DOWN   | DIRAS family GTPase 2 [Source:HGNC Symbol;Acc:HGNC:19323]                                            | chr9       | 90609832  | 90643105  | 4386  |
| FAM25A     | -0.61585806  | 1.66278E-05 | 7.97774E-05 | DOWN   | family with sequence similarity 25 member A [Source:HGNC Symbol;Acc:HGNC:23436]                      | chr10      | 87020306  | 87024730  | 345   |
| ADIPOQ     | -0.710782414 | 1.71581E-05 | 8.2126E-05  | DOWN   | adiponectin, C1Q and collagen domain containing [Source:HGNC Symbol;Acc:HGNC:13633]                  | chr3       | 186842690 | 186858463 | 4613  |
| IGFN1      | -0.601693482 | 1.88237E-05 | 8.91104E-05 | DOWN   | immunoglobulin-like and fibronectin type III domain containing 1 [Source:HGNC Symbol;Acc:HGNC:24607] | chr1       | 201190825 | 201228952 | 11810 |
| C16orf89   | -0.637116985 | 1.94425E-05 | 9.1776E-05  | DOWN   | chromosome 16 open reading frame 89 [Source:HGNC Symbol;Acc:HGNC:28687]                              | chr16      | 5044122   | 5066110   | 1968  |
| AC245369.4 | 0.677021086  | 1.99203E-05 | 9.37145E-05 | UP     | Immunoglobulin heavy variable 1-69-2 [Source:UniProtKB/Swiss-Prot;Acc:A0A0G2JMI3]                    | chr14      | 106737110 | 106737547 | 353   |
| CST2       | -0.590547505 | 2.04122E-05 | 9.57058E-05 | DOWN   | cystatin SA [Source:HGNC Symbol;Acc:HGNC:2474]                                                       | chr20      | 23823769  | 23826731  | 748   |



| PARAM      | logFC        | pval        | pval.adj    | UPDOWN | desc                                                                                                       | chr   | start     | end       | size  |
|------------|--------------|-------------|-------------|--------|------------------------------------------------------------------------------------------------------------|-------|-----------|-----------|-------|
| WIF1       | -0.755821187 | 2.15921E-05 | 0.000100665 | DOWN   | WNT inhibitory factor 1 [Source:HGNC Symbol;Acc:HGNC:18081]                                                | chr12 | 65050626  | 65121566  | 2238  |
| DUSP27     | -0.648199518 | 2.28557E-05 | 0.000105984 | DOWN   | dual specificity phosphatase 27 (putative) [Source:HGNC Symbol;Acc:HGNC:25034]                             | chr1  | 167094045 | 167129165 | 4304  |
| SERPINB4   | 0.839454917  | 2.42674E-05 | 0.000111815 | UP     | serpin family B member 4 [Source:HGNC Symbol;Acc:HGNC:10570]                                               | chr18 | 63637259  | 63644298  | 1749  |
| GSTA1      | -0.862682608 | 2.51424E-05 | 0.000115407 | DOWN   | glutathione S-transferase alpha 1 [Source:HGNC Symbol;Acc:HGNC:4626]                                       | chr6  | 52791664  | 52803910  | 1019  |
| PLPPP1     | -0.685029502 | 2.5425E-05  | 0.000116645 | DOWN   | phospholipid phosphatase related 1 [Source:HGNC Symbol;Acc:HGNC:25993]                                     | chr9  | 101028709 | 101325135 | 2716  |
| COL10A1    | -0.653280316 | 2.55515E-05 | 0.000117136 | DOWN   | collagen type X alpha 1 chain [Source:HGNC Symbol;Acc:HGNC:2185]                                           | chr6  | 116118923 | 116126133 | 3682  |
| TSPAN8     | -0.83356956  | 2.96839E-05 | 0.000134047 | DOWN   | tetraspanin 8 [Source:HGNC Symbol;Acc:HGNC:11855]                                                          | chr12 | 71125085  | 71441898  | 1798  |
| PHGR1      | -0.767078046 | 3.64361E-05 | 0.000161167 | DOWN   | proline, histidine and glycine rich 1 [Source:HGNC Symbol;Acc:HGNC:37226]                                  | chr15 | 40351033  | 40356434  | 436   |
| HEPHL1     | 0.743066753  | 3.9765E-05  | 0.00017415  | UP     | hephaestin like 1 [Source:HGNC Symbol;Acc:HGNC:30477]                                                      | chr11 | 94021361  | 94113751  | 5345  |
| PRSS1      | -0.759784287 | 3.98899E-05 | 0.000174654 | DOWN   | protease, serine 1 [Source:HGNC Symbol;Acc:HGNC:9475]                                                      | chr7  | 142749468 | 142753076 | 859   |
| IGHV4-4    | 0.661699761  | 4.9322E-05  | 0.000211708 | UP     | immunoglobulin heavy variable 4-4 [Source:HGNC Symbol;Acc:HGNC:5652]                                       | chr14 | 106011922 | 106012420 | 417   |
| TTR        | -1.037138641 | 5.19793E-05 | 0.000221854 | DOWN   | transthyretin [Source:HGNC Symbol;Acc:HGNC:12405]                                                          | chr18 | 31591722  | 31599021  | 1081  |
| CXCL17     | -0.623329346 | 5.41213E-05 | 0.000229753 | DOWN   | C-X-C motif chemokine ligand 17 [Source:HGNC Symbol;Acc:HGNC:19232]                                        | chr19 | 42428288  | 42443048  | 1172  |
| SERPINB7   | 0.627999166  | 5.46415E-05 | 0.000231689 | UP     | serpin family B member 7 [Source:HGNC Symbol;Acc:HGNC:13902]                                               | chr18 | 63753047  | 63805376  | 2367  |
| ATP10B     | -0.615652747 | 5.62391E-05 | 0.000237741 | DOWN   | ATPase phospholipid transporting 10B (putative) [Source:HGNC Symbol;Acc:HGNC:13543]                        | chr5  | 160563120 | 160852212 | 7566  |
| FAM83C     | -0.593525008 | 5.82392E-05 | 0.000244769 | DOWN   | family with sequence similarity 83 member C [Source:HGNC Symbol;Acc:HGNC:16121]                            | chr20 | 35285731  | 35292401  | 3145  |
| UGT1A7     | -0.694640685 | 5.88077E-05 | 0.000246987 | DOWN   | UDP glucuronosyltransferase family 1 member A7 [Source:HGNC Symbol;Acc:HGNC:12539]                         | chr2  | 233681938 | 233773299 | 2333  |
| KCNJ3      | -0.596902507 | 6.1539E-05  | 0.000257385 | DOWN   | potassium voltage-gated channel subfamily J member 3 [Source:HGNC Symbol;Acc:HGNC:6264]                    | chr2  | 154698299 | 154858352 | 5022  |
| HNF4G      | 0.586480026  | 6.275E-05   | 0.000261906 | UP     | hepatocyte nuclear factor 4 gamma [Source:HGNC Symbol;Acc:HGNC:5026]                                       | chr8  | 75408036  | 75566843  | 4456  |
| PTPRT      | -0.594279458 | 6.46559E-05 | 0.000268871 | DOWN   | protein tyrosine phosphatase, receptor type T [Source:HGNC Symbol;Acc:HGNC:9682]                           | chr20 | 42072752  | 43189970  | 12824 |
| SPOCK3     | -0.615487733 | 6.80314E-05 | 0.000281487 | DOWN   | SPARC/osteonectin, cwcv and kazal like domains proteoglycan 3 [Source:HGNC Symbol;Acc:HGNC:13565]          | chr4  | 166733384 | 167234796 | 3890  |
| KRT6A      | 0.984941638  | 7.0832E-05  | 0.000291949 | UP     | keratin 6A [Source:HGNC Symbol;Acc:HGNC:6443]                                                              | chr12 | 52487174  | 52493257  | 2310  |
| ADH1C      | -0.672713632 | 7.89693E-05 | 0.000321679 | DOWN   | alcohol dehydrogenase 1C (class I), gamma polypeptide [Source:HGNC Symbol;Acc:HGNC:251]                    | chr4  | 99336492  | 99353027  | 1740  |
| PCSK2      | -0.590800542 | 8.03838E-05 | 0.000326707 | DOWN   | proprotein convertase subtilisin/kexin type 2 [Source:HGNC Symbol;Acc:HGNC:8744]                           | chr20 | 17226107  | 17484578  | 5013  |
| ANXA10     | -0.797109994 | 9.15797E-05 | 0.000366541 | DOWN   | annexin A10 [Source:HGNC Symbol;Acc:HGNC:534]                                                              | chr4  | 168092515 | 168187690 | 1417  |
| S100A7     | 0.773993161  | 0.000118344 | 0.000461538 | UP     | S100 calcium binding protein A7 [Source:HGNC Symbol;Acc:HGNC:10497]                                        | chr1  | 153457744 | 153460701 | 536   |
| KDM5D      | -0.925952493 | 0.000120608 | 0.000469257 | DOWN   | lysine demethylase 5D [Source:HGNC Symbol;Acc:HGNC:11115]                                                  | chrY  | 19705415  | 19744939  | 5581  |
| CFHR1      | -0.870199213 | 0.000128358 | 0.000496854 | DOWN   | complement factor H related 1 [Source:HGNC Symbol;Acc:HGNC:4888]                                           | chr1  | 196819757 | 196832189 | 1271  |
| TMPPRSS4   | -0.638484484 | 0.000133665 | 0.000515415 | DOWN   | transmembrane protease, serine 4 [Source:HGNC Symbol;Acc:HGNC:11878]                                       | chr11 | 118077012 | 118121890 | 5582  |
| UGT1A9     | -0.687819846 | 0.000135166 | 0.000520758 | DOWN   | UDP glucuronosyltransferase family 1 member A9 [Source:HGNC Symbol;Acc:HGNC:12541]                         | chr2  | 233671853 | 233773300 | 2416  |
| GABRP      | 0.690820021  | 0.000139486 | 0.00053547  | UP     | gamma-aminobutyric acid type A receptor pi subunit [Source:HGNC Symbol;Acc:HGNC:4089]                      | chr5  | 170782682 | 170814047 | 3670  |
| LPA        | -0.669003924 | 0.000140429 | 0.000538291 | DOWN   | lipoprotein(a) [Source:HGNC Symbol;Acc:HGNC:6667]                                                          | chr6  | 160531483 | 160664259 | 6419  |
| TMPPRSS11E | -0.631515679 | 0.000164078 | 0.000617584 | DOWN   | transmembrane protease, serine 11E [Source:HGNC Symbol;Acc:HGNC:24465]                                     | chr4  | 68447449  | 68497604  | 2136  |
| ZFY        | -0.789136669 | 0.000166797 | 0.000626647 | DOWN   | zinc finger protein, Y-linked [Source:HGNC Symbol;Acc:HGNC:12870]                                          | chrY  | 2935281   | 2982506   | 5406  |
| PRSS2      | -0.734416045 | 0.000186509 | 0.000693659 | DOWN   | protease, serine 2 [Source:HGNC Symbol;Acc:HGNC:9483]                                                      | chr7  | 142760398 | 142774564 | 915   |
| RBP4       | -0.728418867 | 0.000196186 | 0.000725779 | DOWN   | retinol binding protein 4 [Source:HGNC Symbol;Acc:HGNC:9922]                                               | chr10 | 93591687  | 93601744  | 1449  |
| TNNT1      | 0.645361517  | 0.000212749 | 0.000778321 | UP     | troponin T1, slow skeletal type [Source:HGNC Symbol;Acc:HGNC:11948]                                        | chr19 | 55132794  | 55149354  | 1519  |
| UTY        | -0.879244743 | 0.000220713 | 0.000804209 | DOWN   | ubiquitously transcribed tetratricopeptide repeat containing, Y-linked [Source:HGNC Symbol;Acc:HGNC:12638] | chrY  | 13248379  | 13480673  | 8085  |
| LGR5       | -0.618602224 | 0.000231009 | 0.000837349 | DOWN   | leucine rich repeat containing G protein-coupled receptor 5 [Source:HGNC Symbol;Acc:HGNC:4504]             | chr12 | 71439770  | 71586310  | 4611  |
| C6         | -0.688201479 | 0.000250396 | 0.000899779 | DOWN   | complement C6 [Source:HGNC Symbol;Acc:HGNC:1339]                                                           | chr5  | 41142234  | 41261438  | 3796  |
| DPP10      | -0.666407056 | 0.000252502 | 0.000906736 | DOWN   | dipeptidyl peptidase like 10 [Source:HGNC Symbol;Acc:HGNC:20823]                                           | chr2  | 114442299 | 115845752 | 7441  |
| TXLNGY     | -0.766030259 | 0.00026601  | 0.000948853 | DOWN   | taxilin gamma pseudogene, Y-linked [Source:HGNC Symbol;Acc:HGNC:18473]                                     | chrY  | 19567313  | 19606274  | 8661  |
| KRT13      | -0.697248381 | 0.000297863 | 0.001052124 | DOWN   | keratin 13 [Source:HGNC Symbol;Acc:HGNC:6415]                                                              | chr17 | 41500981  | 41505613  | 1864  |
| DSG3       | 0.833711598  | 0.000304208 | 0.001072029 | UP     | desmoglein 3 [Source:HGNC Symbol;Acc:HGNC:3050]                                                            | chr18 | 31447795  | 31478702  | 5525  |
| TM45F4     | -0.738158355 | 0.000308989 | 0.001085284 | DOWN   | transmembrane 4 L six family member 4 [Source:HGNC Symbol;Acc:HGNC:11856]                                  | chr3  | 149473974 | 149503281 | 2101  |
| CEACAM6    | -0.795335557 | 0.000318358 | 0.001113884 | DOWN   | carcinoembryonic antigen related cell adhesion molecule 6 [Source:HGNC Symbol;Acc:HGNC:1818]               | chr19 | 41755421  | 41772208  | 2700  |
| DDX3Y      | -0.815585002 | 0.000368728 | 0.001266656 | DOWN   | DEAD-box helicase 3, Y-linked [Source:HGNC Symbol;Acc:HGNC:2699]                                           | chrY  | 12904108  | 12920478  | 4752  |
| RPS4Y1     | -0.846780118 | 0.000380966 | 0.001302527 | DOWN   | ribosomal protein S4, Y-linked 1 [Source:HGNC Symbol;Acc:HGNC:10425]                                       | chrY  | 2841486   | 2867268   | 1305  |
| AGR3       | -0.730617348 | 0.000390093 | 0.00132947  | DOWN   | anterior gradient 3, protein disulphide isomerase family member [Source:HGNC Symbol;Acc:HGNC:24167]        | chr7  | 16859405  | 16881987  | 796   |
| SAA1       | 0.609937231  | 0.000465551 | 0.001555352 | UP     | serum amyloid A1 [Source:HGNC Symbol;Acc:HGNC:10513]                                                       | chr11 | 18266174  | 18269977  | 765   |
| UGT2B4     | -0.844594139 | 0.00051854  | 0.001709955 | DOWN   | UDP glucuronosyltransferase family 2 member B4 [Source:HGNC Symbol;Acc:HGNC:12553]                         | chr4  | 69480165  | 69495908  | 2120  |
| CLCA4      | -0.590473166 | 0.000552116 | 0.001814132 | DOWN   | chloride channel accessory 4 [Source:HGNC Symbol;Acc:HGNC:2018]                                            | chr1  | 86547078  | 86580754  | 3211  |
| PRKY       | -0.701223477 | 0.000560189 | 0.001828076 | DOWN   | protein kinase, Y-linked, pseudogene [Source:HGNC Symbol;Acc:HGNC:9444]                                    | chrY  | 7273972   | 7381548   | 7218  |
| KRT6C      | 0.735320769  | 0.000585739 | 0.001904255 | UP     | keratin 6C [Source:HGNC Symbol;Acc:HGNC:20406]                                                             | chr12 | 52468516  | 52473785  | 2289  |
| KRT6B      | 0.869607194  | 0.000641654 | 0.002067133 | UP     | keratin 6B [Source:HGNC Symbol;Acc:HGNC:6444]                                                              | chr12 | 52446651  | 52452126  | 2282  |
| EIF1AY     | -0.68803616  | 0.000721476 | 0.002286103 | DOWN   | eukaryotic translation initiation factor 1A, Y-linked [Source:HGNC Symbol;Acc:HGNC:3252]                   | chrY  | 20575725  | 20593154  | 1390  |

| PARAM    | logFC        | pval        | pval.adj    | UPDOWN | desc                                                                                           | chr   | start     | end       | size  |
|----------|--------------|-------------|-------------|--------|------------------------------------------------------------------------------------------------|-------|-----------|-----------|-------|
| USP9Y    | -0.793807322 | 0.000839851 | 0.002616382 | DOWN   | ubiquitin specific peptidase 9, Y-linked [Source:HGNC Symbol;Acc:HGNC:12633]                   | chrY  | 12701231  | 12860839  | 10036 |
| ITIH2    | -0.84962567  | 0.000858551 | 0.002667762 | DOWN   | inter-alpha-trypsin inhibitor heavy chain 2 [Source:HGNC Symbol;Acc:HGNC:6167]                 | chr10 | 7703269   | 7749520   | 3193  |
| SERPINA4 | -0.627746843 | 0.001083404 | 0.003273321 | DOWN   | serpin family A member 4 [Source:HGNC Symbol;Acc:HGNC:8948]                                    | chr14 | 94561091  | 94569913  | 2338  |
| TFF1     | -0.6900139   | 0.001104485 | 0.003328141 | DOWN   | trefoil factor 1 [Source:HGNC Symbol;Acc:HGNC:11755]                                           | chr21 | 42362282  | 42366594  | 551   |
| SLCO1B3  | 0.628614369  | 0.00115653  | 0.003461952 | UP     | solute carrier organic anion transporter family member 1B3 [Source:HGNC Symbol;Acc:HGNC:10961] | chr12 | 20810726  | 20916911  | 2994  |
| AMBP     | -0.872091469 | 0.0011633   | 0.003478772 | DOWN   | alpha-1-microglobulin/bikunin precursor [Source:HGNC Symbol;Acc:HGNC:453]                      | chr9  | 114060127 | 114078472 | 1434  |
| PAH      | -0.785754291 | 0.001234083 | 0.003670466 | DOWN   | phenylalanine hydroxylase [Source:HGNC Symbol;Acc:HGNC:8582]                                   | chr12 | 102836885 | 102917603 | 4254  |
| PRAME    | 0.728447303  | 0.001384777 | 0.004060057 | UP     | preferentially expressed antigen in melanoma [Source:HGNC Symbol;Acc:HGNC:9336]                | chr22 | 22547701  | 22559340  | 2996  |
| GJB1     | -0.625311616 | 0.001417097 | 0.004146101 | DOWN   | gap junction protein beta 1 [Source:HGNC Symbol;Acc:HGNC:4283]                                 | chrX  | 71215194  | 71225516  | 2052  |
| APOB     | -0.614233473 | 0.001687697 | 0.004824159 | DOWN   | apolipoprotein B [Source:HGNC Symbol;Acc:HGNC:603]                                             | chr2  | 21001429  | 21044073  | 14828 |
| CEACAM5  | -0.770462768 | 0.002078628 | 0.005795418 | DOWN   | carcinoembryonic antigen related cell adhesion molecule 5 [Source:HGNC Symbol;Acc:HGNC:1817]   | chr19 | 41708585  | 41729798  | 2907  |
| HPD      | -0.626317284 | 0.002441568 | 0.006679956 | DOWN   | 4-hydroxyphenylpyruvate dioxygenase [Source:HGNC Symbol;Acc:HGNC:5147]                         | chr12 | 121839527 | 121863596 | 1751  |
| UGT2B7   | -0.614441391 | 0.003863304 | 0.009958141 | DOWN   | UDP glucuronosyltransferase family 2 member B7 [Source:HGNC Symbol;Acc:HGNC:12554]             | chr4  | 69096475  | 69112987  | 1887  |
| KRT14    | 0.590335662  | 0.004542049 | 0.011479215 | UP     | keratin 14 [Source:HGNC Symbol;Acc:HGNC:6416]                                                  | chr17 | 41582279  | 41586921  | 1662  |
| SERPINB3 | 0.586066315  | 0.004709281 | 0.011857239 | UP     | serpin family B member 3 [Source:HGNC Symbol;Acc:HGNC:10569]                                   | chr18 | 63655197  | 63661963  | 1777  |
| HABP2    | -0.611044592 | 0.006191519 | 0.015035954 | DOWN   | hyaluronan binding protein 2 [Source:HGNC Symbol;Acc:HGNC:4798]                                | chr10 | 113550837 | 113589602 | 3137  |
| ADH4     | -0.602525308 | 0.006437201 | 0.015547209 | DOWN   | alcohol dehydrogenase 4 (class II), pi polypeptide [Source:HGNC Symbol;Acc:HGNC:252]           | chr4  | 99123657  | 99144297  | 2151  |
| GSTM1    | -0.648650588 | 0.012033524 | 0.026711535 | DOWN   | glutathione S-transferase mu 1 [Source:HGNC Symbol;Acc:HGNC:4632]                              | chr1  | 109687820 | 109708685 | 1423  |
| C8B      | -0.608701978 | 0.016359761 | 0.034830768 | DOWN   | complement C8 beta chain [Source:HGNC Symbol;Acc:HGNC:1353]                                    | chr1  | 56929210  | 56966140  | 2513  |

**Table S3** List of differentially expressed genes.

Tab 3: EXCLUDED\_DESERT

| PARAM      | logFC       | pval        | pval.adj    | UPDOWN | desc                                                                                          | chr   | start     | end       | size  |
|------------|-------------|-------------|-------------|--------|-----------------------------------------------------------------------------------------------|-------|-----------|-----------|-------|
| CD8A       | 1.365521736 | 2.4059E-66  | 4.36214E-62 | UP     | CD8a molecule [Source:HGNC Symbol;Acc:HGNC:1706]                                              | chr2  | 86784610  | 86808396  | 3634  |
| CD3E       | 1.303872488 | 1.69186E-64 | 1.53376E-60 | UP     | CD3e molecule [Source:HGNC Symbol;Acc:HGNC:1674]                                              | chr11 | 118304545 | 118316175 | 1548  |
| SH2D1A     | 1.514257118 | 9.5493E-61  | 5.77128E-57 | UP     | SH2 domain containing 1A [Source:HGNC Symbol;Acc:HGNC:10820]                                  | chrX  | 124346344 | 124373155 | 2450  |
| ITK        | 1.315079858 | 3.91265E-60 | 1.77351E-56 | UP     | IL2 inducible T-cell kinase [Source:HGNC Symbol;Acc:HGNC:6171]                                | chr5  | 157180826 | 157255191 | 4528  |
| CD2        | 1.222438944 | 1.01233E-59 | 3.6709E-56  | UP     | CD2 molecule [Source:HGNC Symbol;Acc:HGNC:1639]                                               | chr1  | 116754385 | 116769228 | 1679  |
| ICOS       | 1.414186142 | 2.19676E-59 | 6.63825E-56 | UP     | inducible T-cell costimulator [Source:HGNC Symbol;Acc:HGNC:5351]                              | chr2  | 203936748 | 203961577 | 2645  |
| PYHIN1     | 1.290994397 | 3.9776E-59  | 1.03026E-55 | UP     | pyrin and HIN domain family member 1 [Source:HGNC Symbol;Acc:HGNC:28894]                      | chr1  | 158931552 | 158977054 | 2937  |
| GZMK       | 1.588359007 | 4.85907E-58 | 1.10125E-54 | UP     | granzyme K [Source:HGNC Symbol;Acc:HGNC:4711]                                                 | chr5  | 55024253  | 55034570  | 1509  |
| CD27       | 1.489678709 | 3.2284E-57  | 6.5038E-54  | UP     | CD27 molecule [Source:HGNC Symbol;Acc:HGNC:11922]                                             | chr12 | 6444867   | 6451718   | 1338  |
| TRAT1      | 1.495976132 | 1.95308E-56 | 3.54114E-53 | UP     | T-cell receptor associated transmembrane adaptor 1 [Source:HGNC Symbol;Acc:HGNC:30698]        | chr3  | 108822698 | 108855005 | 1919  |
| CD3G       | 1.284828919 | 2.15412E-56 | 3.55059E-53 | UP     | CD3g molecule [Source:HGNC Symbol;Acc:HGNC:1675]                                              | chr11 | 118344344 | 118355161 | 2690  |
| ZNF831     | 1.391768342 | 1.06376E-55 | 1.60726E-52 | UP     | zinc finger protein 831 [Source:HGNC Symbol;Acc:HGNC:16167]                                   | chr20 | 59123381  | 59259113  | 10953 |
| TIGIT      | 1.306151621 | 1.807E-55   | 2.52021E-52 | UP     | T-cell immunoreceptor with Ig and ITIM domains [Source:HGNC Symbol;Acc:HGNC:26838]            | chr3  | 114291059 | 114310288 | 5708  |
| CXCR6      | 1.203193251 | 5.69786E-55 | 7.37913E-52 | UP     | C-X-C motif chemokine receptor 6 [Source:HGNC Symbol;Acc:HGNC:16647]                          | chr3  | 45940933  | 45948353  | 3769  |
| THEMIS     | 1.314196614 | 7.43098E-55 | 8.98208E-52 | UP     | thymocyte selection associated [Source:HGNC Symbol;Acc:HGNC:21569]                            | chr6  | 127708072 | 127918631 | 4309  |
| CTLA4      | 1.349916959 | 5.60086E-54 | 6.34682E-51 | UP     | cytotoxic T-lymphocyte associated protein 4 [Source:HGNC Symbol;Acc:HGNC:2505]                | chr2  | 203867786 | 203873960 | 2120  |
| GPR171     | 1.370244548 | 7.29458E-53 | 7.77988E-50 | UP     | G protein-coupled receptor 171 [Source:HGNC Symbol;Acc:HGNC:30057]                            | chr3  | 151197832 | 151203192 | 1786  |
| LAX1       | 1.394687138 | 4.61847E-51 | 4.65208E-48 | UP     | lymphocyte transmembrane adaptor 1 [Source:HGNC Symbol;Acc:HGNC:26005]                        | chr1  | 203765176 | 203776117 | 3023  |
| CD3D       | 1.197591758 | 5.20931E-51 | 4.97106E-48 | UP     | CD3d molecule [Source:HGNC Symbol;Acc:HGNC:1673]                                              | chr11 | 118338954 | 118342744 | 861   |
| CCR4       | 1.33430455  | 1.51998E-50 | 1.37793E-47 | UP     | C-C motif chemokine receptor 4 [Source:HGNC Symbol;Acc:HGNC:1605]                             | chr3  | 32951574  | 32956349  | 3095  |
| GPR174     | 1.324739521 | 3.66062E-50 | 3.16051E-47 | UP     | G protein-coupled receptor 174 [Source:HGNC Symbol;Acc:HGNC:30245]                            | chrX  | 79170972  | 79172229  | 1258  |
| P2RY10     | 1.310160142 | 2.69365E-49 | 2.21994E-46 | UP     | purinergic receptor P2Y10 [Source:HGNC Symbol;Acc:HGNC:19906]                                 | chrX  | 78945332  | 78961954  | 1803  |
| TRAC       | 1.150436834 | 4.02675E-49 | 3.1743E-46  | UP     | T-cell receptor alpha constant [Source:HGNC Symbol;Acc:HGNC:12029]                            | chr14 | 22547506  | 22552154  | 976   |
| SLAMF6     | 1.2696484   | 5.26527E-49 | 3.97769E-46 | UP     | SLAM family member 6 [Source:HGNC Symbol;Acc:HGNC:21392]                                      | chr1  | 160485030 | 160523262 | 2746  |
| CCR5       | 1.066062176 | 7.88857E-49 | 5.72111E-46 | UP     | C-C motif chemokine receptor 5 [gene/pseudogene] [Source:HGNC Symbol;Acc:HGNC:1606]           | chr3  | 46370854  | 46376206  | 3672  |
| IGKC       | 2.029436024 | 2.11336E-48 | 1.47374E-45 | UP     | immunoglobulin kappa constant [Source:HGNC Symbol;Acc:HGNC:5716]                              | chr2  | 88857161  | 88857683  | 523   |
| TRAV12-2   | 1.482069535 | 2.74401E-48 | 1.84265E-45 | UP     | T-cell receptor alpha variable 12-2 [Source:HGNC Symbol;Acc:HGNC:12106]                       | chr14 | 21887857  | 21888502  | 445   |
| IGHG1      | 2.187291905 | 8.55126E-48 | 5.53725E-45 | UP     | immunoglobulin heavy constant gamma 1 (G1m marker) [Source:HGNC Symbol;Acc:HGNC:5525]         | chr14 | 105736343 | 105743071 | 2619  |
| CCL5       | 1.151139067 | 2.48442E-47 | 1.55327E-44 | UP     | C-C motif chemokine ligand 5 [Source:HGNC Symbol;Acc:HGNC:10632]                              | chr17 | 35871491  | 35880793  | 1430  |
| GBP5       | 1.21470641  | 2.90307E-47 | 1.72491E-44 | UP     | guanylate binding protein 5 [Source:HGNC Symbol;Acc:HGNC:19895]                               | chr1  | 89260582  | 89270863  | 2011  |
| UBASH3A    | 1.186996754 | 2.94921E-47 | 1.72491E-44 | UP     | ubiquitin associated and SH3 domain containing A [Source:HGNC Symbol;Acc:HGNC:12462]          | chr21 | 42403862  | 42447681  | 2557  |
| JCHAIN     | 1.785581659 | 3.35974E-47 | 1.90361E-44 | UP     | joining chain of multimeric IgA and IgM [Source:HGNC Symbol;Acc:HGNC:5713]                    | chr4  | 70655541  | 70666975  | 1565  |
| EOMES      | 1.257649621 | 6.11417E-47 | 3.35927E-44 | UP     | eomesodermin [Source:HGNC Symbol;Acc:HGNC:3372]                                               | chr3  | 27715949  | 27727211  | 3656  |
| AC245427.1 | 1.231581889 | 9.4942E-47  | 5.06292E-44 | UP     |                                                                                               | chr7  | 142791694 | 142793368 | 760   |
| HNRNPA1P21 | 1.337772076 | 1.16987E-46 | 6.06025E-44 | UP     | heterogeneous nuclear ribonucleoprotein A1 pseudogene 21 [Source:HGNC Symbol;Acc:HGNC:39539]  | chr3  | 39334979  | 39335939  | 961   |
| CXCL9      | 1.821685559 | 1.39887E-46 | 7.04524E-44 | UP     | C-X-C motif chemokine ligand 9 [Source:HGNC Symbol;Acc:HGNC:7098]                             | chr4  | 76001275  | 76007488  | 2740  |
| GZMH       | 1.39092163  | 2.14463E-46 | 1.05093E-43 | UP     | granzyme H [Source:HGNC Symbol;Acc:HGNC:4710]                                                 | chr14 | 24606480  | 24609699  | 951   |
| KLRK1      | 1.254099099 | 2.79976E-46 | 1.33585E-43 | UP     | killer cell lectin like receptor K1 [Source:HGNC Symbol;Acc:HGNC:18788]                       | chr12 | 10372353  | 10390018  | 1654  |
| ITGAL      | 0.979473395 | 6.1452E-46  | 2.85689E-43 | UP     | integrin subunit alpha L [Source:HGNC Symbol;Acc:HGNC:6148]                                   | chr16 | 30472658  | 30523185  | 5213  |
| SIRPG      | 1.312196921 | 2.59118E-45 | 1.17452E-42 | UP     | signal regulatory protein gamma [Source:HGNC Symbol;Acc:HGNC:15757]                           | chr20 | 1629152   | 1657779   | 1870  |
| MAP4K1     | 0.905841901 | 2.79931E-45 | 1.23791E-42 | UP     | mitogen-activated protein kinase kinase kinase kinase 1 [Source:HGNC Symbol;Acc:HGNC:6863]    | chr19 | 38587641  | 38618882  | 2897  |
| SLAMF1     | 1.183936294 | 3.03505E-45 | 1.3102E-42  | UP     | signaling lymphocytic activation molecule family member 1 [Source:HGNC Symbol;Acc:HGNC:10903] | chr1  | 160608100 | 160647295 | 4089  |
| ACAP1      | 1.02606558  | 1.14658E-44 | 4.83457E-42 | UP     | ArfGAP with coiled-coil, ankyrin repeat and PH domains 1 [Source:HGNC Symbol;Acc:HGNC:16467]  | chr17 | 7336529   | 7351478   | 2880  |
| FCRL3      | 1.6046072   | 1.18547E-44 | 4.88493E-42 | UP     | Fc receptor like 3 [Source:HGNC Symbol;Acc:HGNC:18506]                                        | chr1  | 157676481 | 157700857 | 4726  |
| IL2RB      | 0.959031753 | 1.43263E-44 | 5.77223E-42 | UP     | Interleukin 2 receptor subunit beta [Source:HGNC Symbol;Acc:HGNC:6009]                        | chr22 | 37125838  | 37149990  | 4113  |
| IGKV1D-39  | 2.241458175 | 2.38907E-44 | 9.41656E-42 | UP     | immunoglobulin kappa variable 1D-39 [Source:HGNC Symbol;Acc:HGNC:5756]                        | chr2  | 89862482  | 89862981  | 376   |
| CD5        | 1.129933953 | 2.57993E-44 | 9.95251E-42 | UP     | CD5 molecule [Source:HGNC Symbol;Acc:HGNC:1685]                                               | chr11 | 61102395  | 61127852  | 3221  |
| IGLC2      | 1.964555525 | 4.70481E-44 | 1.77715E-41 | UP     | immunoglobulin lambda constant 2 [Source:HGNC Symbol;Acc:HGNC:5856]                           | chr22 | 22900976  | 22901437  | 462   |
| GZMA       | 1.181750106 | 5.35491E-44 | 1.98143E-41 | UP     | granzyme A [Source:HGNC Symbol;Acc:HGNC:4708]                                                 | chr5  | 55102648  | 55110252  | 894   |
| CRTAM      | 1.208998982 | 6.77333E-44 | 2.45615E-41 | UP     | cytotoxic and regulatory T-cell molecule [Source:HGNC Symbol;Acc:HGNC:24313]                  | chr11 | 122838500 | 122872639 | 2630  |
| IGLL5      | 2.022892051 | 8.6368E-44  | 3.06097E-41 | UP     | immunoglobulin lambda like polypeptide 5 [Source:HGNC Symbol;Acc:HGNC:38476]                  | chr22 | 22887780  | 22896107  | 1335  |
| PTPRC      | 0.894926031 | 8.7789E-44  | 3.06097E-41 | UP     | protein tyrosine phosphatase, receptor type C [Source:HGNC Symbol;Acc:HGNC:9666]              | chr1  | 198639040 | 198757283 | 7151  |
| SLAMF7     | 1.144666557 | 9.58866E-44 | 3.28023E-41 | UP     | SLAM family member 7 [Source:HGNC Symbol;Acc:HGNC:21394]                                      | chr1  | 160739057 | 160754821 | 2936  |

| PARAM    | logFC       | pval        | pval.adj    | UPDOWN | desc                                                                                           | chr   | start     | end       | size |
|----------|-------------|-------------|-------------|--------|------------------------------------------------------------------------------------------------|-------|-----------|-----------|------|
| IGHV3-7  | 2.161815243 | 1.5175E-43  | 5.09516E-41 | UP     | immunoglobulin heavy variable 3-7 [Source:HGNC Symbol;Acc:HGNC:5620]                           | chr14 | 106062151 | 106062683 | 430  |
| CD48     | 1.041451247 | 1.68471E-43 | 5.55373E-41 | UP     | CD48 molecule [Source:HGNC Symbol;Acc:HGNC:1683]                                               | chr1  | 160678746 | 160711851 | 3274 |
| SEPT1    | 1.067156305 | 2.08176E-43 | 6.74007E-41 | UP     | septin 1 [Source:HGNC Symbol;Acc:HGNC:2879]                                                    | chr16 | 30378133  | 30382850  | 1592 |
| DTHD1    | 1.338433025 | 2.30552E-43 | 7.33357E-41 | UP     | death domain containing 1 [Source:HGNC Symbol;Acc:HGNC:37261]                                  | chr4  | 36281622  | 36344785  | 5933 |
| IGKV1-5  | 2.162378515 | 2.87943E-43 | 9.0012E-41  | UP     | immunoglobulin kappa variable 1-5 [Source:HGNC Symbol;Acc:HGNC:5741]                           | chr2  | 88947301  | 88947957  | 332  |
| IGKV3-20 | 2.111968825 | 3.06178E-43 | 9.409E-41   | UP     | immunoglobulin kappa variable 3-20 [Source:HGNC Symbol;Acc:HGNC:5817]                          | chr2  | 89142574  | 89143160  | 400  |
| CYTI1    | 0.983870757 | 6.88619E-43 | 2.08089E-40 | UP     | cytohesin 1 interacting protein [Source:HGNC Symbol;Acc:HGNC:9506]                             | chr2  | 157414619 | 157444142 | 2260 |
| PDCD1    | 1.319992066 | 1.13755E-42 | 3.38112E-40 | UP     | programmed cell death 1 [Source:HGNC Symbol;Acc:HGNC:8760]                                     | chr2  | 241849881 | 241858908 | 2114 |
| IGHG2    | 2.005381633 | 1.28805E-42 | 3.76672E-40 | UP     | immunoglobulin heavy constant gamma 2 (G2m marker) [Source:HGNC Symbol;Acc:HGNC:5526]          | chr14 | 105639559 | 105644790 | 2594 |
| IGHV3-11 | 2.177126966 | 4.82866E-42 | 1.38966E-39 | UP     | immunoglobulin kappa variable 3-11 [Source:HGNC Symbol;Acc:HGNC:5815]                          | chr2  | 89027171  | 89027731  | 392  |
| CD38     | 1.224614393 | 5.96303E-42 | 1.68931E-39 | UP     | CD38 molecule [Source:HGNC Symbol;Acc:HGNC:1667]                                               | chr4  | 15778278  | 15853230  | 5668 |
| SP140    | 1.032892263 | 6.43952E-42 | 1.79623E-39 | UP     | SP140 nuclear body protein [Source:HGNC Symbol;Acc:HGNC:17133]                                 | chr2  | 230225730 | 230313215 | 3577 |
| IL10RA   | 0.787553979 | 1.37371E-41 | 3.77375E-39 | UP     | interleukin 10 receptor subunit alpha [Source:HGNC Symbol;Acc:HGNC:5964]                       | chr11 | 117986348 | 118001479 | 3695 |
| CD79A    | 1.678062889 | 1.69371E-41 | 4.58339E-39 | UP     | CD79a molecule [Source:HGNC Symbol;Acc:HGNC:1698]                                              | chr19 | 41877120  | 41881372  | 1258 |
| IGHG3    | 2.084360309 | 1.83449E-41 | 4.89134E-39 | UP     | immunoglobulin heavy constant gamma 3 (G3m marker) [Source:HGNC Symbol;Acc:HGNC:5527]          | chr14 | 105764503 | 105771405 | 2751 |
| IGKV2-28 | 2.211262655 | 2.49832E-41 | 6.56478E-39 | UP     | immunoglobulin kappa variable 2-28 [Source:HGNC Symbol;Acc:HGNC:5783]                          | chr2  | 89221698  | 89222461  | 390  |
| NLR3     | 0.987322387 | 2.5591E-41  | 6.62844E-39 | UP     | NLR family CARD domain containing 3 [Source:HGNC Symbol;Acc:HGNC:29889]                        | chr16 | 3539033   | 3577391   | 6453 |
| IGHV3-23 | 2.14072121  | 4.00954E-41 | 1.01663E-38 | UP     | immunoglobulin heavy variable 3-23 [Source:HGNC Symbol;Acc:HGNC:5588]                          | chr14 | 106268606 | 106269140 | 432  |
| IGHV1-46 | 2.291817006 | 4.03713E-41 | 1.01663E-38 | UP     | immunoglobulin heavy variable 1-46 [Source:HGNC Symbol;Acc:HGNC:5554]                          | chr14 | 106511117 | 106511856 | 655  |
| LY9      | 1.192166192 | 4.9981E-41  | 1.24138E-38 | UP     | lymphocyte antigen 9 [Source:HGNC Symbol;Acc:HGNC:6730]                                        | chr1  | 160796074 | 160828261 | 3436 |
| CS77     | 1.025977379 | 8.31445E-41 | 2.03715E-38 | UP     | cystatin F [Source:HGNC Symbol;Acc:HGNC:2479]                                                  | chr20 | 24949230  | 24959928  | 930  |
| MZB1     | 1.720829325 | 1.02034E-40 | 2.46664E-38 | UP     | marginal zone B and B1 cell specific protein [Source:HGNC Symbol;Acc:HGNC:30125]               | chr5  | 139387568 | 139389914 | 825  |
| IGLV2-14 | 2.11896261  | 1.07704E-40 | 2.56945E-38 | UP     | immunoglobulin lambda variable 2-14 [Source:HGNC Symbol;Acc:HGNC:5888]                         | chr22 | 22758700  | 22759218  | 402  |
| CD6      | 0.992762126 | 1.21998E-40 | 2.87266E-38 | UP     | CD6 molecule [Source:HGNC Symbol;Acc:HGNC:1691]                                                | chr11 | 60971680  | 61020377  | 3252 |
| GPR183   | 1.089495205 | 1.31782E-40 | 3.06324E-38 | UP     | G protein-coupled receptor 183 [Source:HGNC Symbol;Acc:HGNC:3128]                              | chr13 | 99294530  | 99307405  | 1700 |
| IKZF1    | 0.913674725 | 3.59315E-40 | 8.24651E-38 | UP     | IKAROS family zinc finger 1 [Source:HGNC Symbol;Acc:HGNC:13176]                                | chr7  | 50304728  | 50405101  | 7868 |
| IL12RB1  | 0.918666965 | 3.70302E-40 | 8.39244E-38 | UP     | interleukin 12 receptor subunit beta 1 [Source:HGNC Symbol;Acc:HGNC:5971]                      | chr19 | 18058995  | 18089844  | 3744 |
| SAMS1    | 0.817462283 | 4.37002E-40 | 9.78184E-38 | UP     | SAM domain, SH3 domain and nuclear localization signals 1 [Source:HGNC Symbol;Acc:HGNC:10528]  | chr21 | 14485228  | 14583402  | 2465 |
| IGKV4-1  | 2.046994825 | 5.38974E-40 | 1.19172E-37 | UP     | immunoglobulin kappa variable 4-1 [Source:HGNC Symbol;Acc:HGNC:5834]                           | chr2  | 88885397  | 88886153  | 538  |
| IGHA1    | 1.811330277 | 8.77557E-40 | 1.91699E-37 | UP     | immunoglobulin heavy constant alpha 1 [Source:HGNC Symbol;Acc:HGNC:5478]                       | chr14 | 105703995 | 105708665 | 1310 |
| IGHV4-59 | 2.214047528 | 1.0331E-39  | 2.22681E-37 | UP     | immunoglobulin heavy variable 4-59 [Source:HGNC Symbol;Acc:HGNC:5654]                          | chr14 | 106627249 | 106627825 | 495  |
| IGHV3-15 | 2.100803274 | 1.04395E-39 | 2.22681E-37 | UP     | immunoglobulin heavy variable 3-15 [Source:HGNC Symbol;Acc:HGNC:5582]                          | chr14 | 106153624 | 106154163 | 437  |
| TRBC2    | 1.04309376  | 1.22123E-39 | 2.56838E-37 | UP     | T-cell receptor beta constant 2 [Source:HGNC Symbol;Acc:HGNC:12157]                            | chr7  | 142801041 | 142802748 | 758  |
| IGKV1-12 | 2.156397029 | 1.23242E-39 | 2.56838E-37 | UP     | immunoglobulin kappa variable 1-12 [Source:HGNC Symbol;Acc:HGNC:5730]                          | chr2  | 89040224  | 89040745  | 398  |
| IGHV3-11 | 2.217922022 | 1.26176E-39 | 2.59965E-37 | UP     | immunoglobulin heavy variable 3-11 (gene/pseudogene) [Source:HGNC Symbol;Acc:HGNC:5580]        | chr14 | 106116635 | 106117204 | 473  |
| TRBV20-1 | 1.309974628 | 1.30601E-39 | 2.66059E-37 | UP     | T-cell receptor beta variable 20-1 [Source:HGNC Symbol;Acc:HGNC:12196]                         | chr7  | 142626649 | 142627399 | 413  |
| IGHV3-48 | 2.190749745 | 3.35346E-39 | 6.74679E-37 | UP     | immunoglobulin heavy variable 3-48 [Source:HGNC Symbol;Acc:HGNC:5606]                          | chr14 | 106537810 | 106538344 | 432  |
| FCRL5    | 1.827438775 | 3.38623E-39 | 6.74679E-37 | UP     | Fc receptor like 5 [Source:HGNC Symbol;Acc:HGNC:18508]                                         | chr1  | 157513377 | 157552520 | 8508 |
| IGHV4-34 | 2.130678155 | 4.5422E-39  | 8.9516E-37  | UP     | immunoglobulin heavy variable 4-34 [Source:HGNC Symbol;Acc:HGNC:5650]                          | chr14 | 106373663 | 106374145 | 400  |
| IGHV6-1  | 1.984407508 | 5.62429E-39 | 1.0965E-36  | UP     | immunoglobulin heavy variable 6-1 [Source:HGNC Symbol;Acc:HGNC:5662]                           | chr14 | 105939756 | 105940253 | 415  |
| SLFN12L  | 0.940569292 | 6.35877E-39 | 1.2265E-36  | UP     | schlafen family member 12 like [Source:HGNC Symbol;Acc:HGNC:33920]                             | chr17 | 35473689  | 35537861  | 4113 |
| IGLV3-1  | 2.135859786 | 6.82051E-39 | 1.30171E-36 | UP     | immunoglobulin lambda variable 3-1 [Source:HGNC Symbol;Acc:HGNC:5896]                          | chr22 | 22880706  | 22881396  | 398  |
| IGLV2-11 | 2.118847817 | 7.5193E-39  | 1.42013E-36 | UP     | immunoglobulin lambda variable 2-11 [Source:HGNC Symbol;Acc:HGNC:5887]                         | chr22 | 22792491  | 22793007  | 400  |
| IGHV1-18 | 2.197531036 | 7.62752E-39 | 1.42572E-36 | UP     | immunoglobulin heavy variable 1-18 [Source:HGNC Symbol;Acc:HGNC:5549]                          | chr14 | 106184901 | 106185394 | 410  |
| ZAP70    | 1.006220793 | 7.73062E-39 | 1.43024E-36 | UP     | zeta chain of T-cell receptor associated protein kinase 70 [Source:HGNC Symbol;Acc:HGNC:12858] | chr2  | 97713560  | 97739860  | 2551 |
| IGHV5-51 | 2.184009581 | 8.35053E-39 | 1.52933E-36 | UP     | immunoglobulin heavy variable 5-51 [Source:HGNC Symbol;Acc:HGNC:5659]                          | chr14 | 106578744 | 106579236 | 410  |
| IGKV3-15 | 2.114093113 | 9.9179E-39  | 1.79821E-36 | UP     | immunoglobulin kappa variable 3-15 [Source:HGNC Symbol;Acc:HGNC:5816]                          | chr2  | 89085177  | 89085787  | 442  |
| IGKV1-39 | 2.134814669 | 1.05757E-38 | 1.89849E-36 | UP     | immunoglobulin kappa variable 1-39 (gene/pseudogene) [Source:HGNC Symbol;Acc:HGNC:5740]        | chr2  | 89319625  | 89320146  | 398  |
| CCR8     | 1.204732941 | 1.2295E-38  | 2.18549E-36 | UP     | C-C motif chemokine receptor 8 [Source:HGNC Symbol;Acc:HGNC:1609]                              | chr3  | 39329706  | 39335111  | 1318 |
| RGS1     | 1.214754928 | 1.76236E-38 | 3.07974E-36 | UP     | regulator of G protein signaling 1 [Source:HGNC Symbol;Acc:HGNC:9991]                          | chr1  | 192575727 | 192580031 | 1975 |
| IRF4     | 1.321255841 | 1.76655E-38 | 3.07974E-36 | UP     | interferon regulatory factor 4 [Source:HGNC Symbol;Acc:HGNC:6119]                              | chr6  | 391739    | 411447    | 5331 |
| IGHV3-21 | 2.230088071 | 2.90764E-38 | 5.02081E-36 | UP     | immunoglobulin heavy variable 3-21 [Source:HGNC Symbol;Acc:HGNC:5586]                          | chr14 | 106235064 | 106235594 | 430  |
| CD52     | 1.005435585 | 5.15722E-38 | 8.82127E-36 | UP     | CD52 molecule [Source:HGNC Symbol;Acc:HGNC:1804]                                               | chr1  | 26317957  | 26320523  | 468  |
| TRGV10   | 1.238784085 | 5.81998E-38 | 9.86187E-36 | UP     | T-cell receptor gamma variable 10 (non-functional) [Source:HGNC Symbol;Acc:HGNC:12285]         | chr7  | 38299811  | 38300322  | 512  |
| IGKV2-30 | 2.040173532 | 6.25629E-38 | 1.0503E-35  | UP     | immunoglobulin kappa variable 2-30 [Source:HGNC Symbol;Acc:HGNC:5785]                          | chr2  | 89244781  | 89245596  | 390  |
| FAM30A   | 1.612401127 | 1.03867E-37 | 1.72772E-35 | UP     | family with sequence similarity 30 member A [Source:HGNC Symbol;Acc:HGNC:19955]                | chr14 | 105917979 | 105932642 | 9612 |

| PARAM     | logFC       | pval        | pval.adj    | UPDOWN | desc                                                                                                      | chr   | start     | end       | size |
|-----------|-------------|-------------|-------------|--------|-----------------------------------------------------------------------------------------------------------|-------|-----------|-----------|------|
| TRAF3IP3  | 0.953337253 | 1.11097E-37 | 1.83118E-35 | UP     | TRAF3 interacting protein 3 [Source:HGNC Symbol;Acc:HGNC:30766]                                           | chr1  | 209756032 | 209782320 | 3077 |
| ZBP1      | 1.19635848  | 1.84129E-37 | 3.00761E-35 | UP     | Z-DNA binding protein 1 [Source:HGNC Symbol;Acc:HGNC:16176]                                               | chr20 | 57603846  | 57620576  | 2570 |
| CD7       | 1.044400194 | 1.88437E-37 | 3.04148E-35 | UP     | CD7 molecule [Source:HGNC Symbol;Acc:HGNC:1695]                                                           | chr17 | 82314868  | 82317602  | 2478 |
| IGHM      | 1.773599454 | 1.89558E-37 | 3.04148E-35 | UP     | immunoglobulin heavy constant mu [Source:HGNC Symbol;Acc:HGNC:5541]                                       | chr14 | 105851708 | 105856218 | 1683 |
| CXCL13    | 1.747309189 | 2.13686E-37 | 3.39855E-35 | UP     | C-X-C motif chemokine ligand 13 [Source:HGNC Symbol;Acc:HGNC:10639]                                       | chr4  | 77511753  | 77511834  | 1203 |
| IL7R      | 1.059188913 | 3.76158E-37 | 5.93053E-35 | UP     | interleukin 7 receptor [Source:HGNC Symbol;Acc:HGNC:6024]                                                 | chr5  | 35856849  | 35879603  | 4908 |
| GZMB      | 1.280780835 | 4.6497E-37  | 7.26757E-35 | UP     | granzyme B [Source:HGNC Symbol;Acc:HGNC:4709]                                                             | chr14 | 24630954  | 24634267  | 1304 |
| TRBV29-1  | 1.316618075 | 5.28369E-37 | 8.18792E-35 | UP     | T-cell receptor beta variable 29-1 [Source:HGNC Symbol;Acc:HGNC:12210]                                    | chr7  | 142740206 | 142740894 | 402  |
| LCK       | 0.897019496 | 7.76976E-37 | 1.19384E-34 | UP     | LCK proto-oncogene, Src family tyrosine kinase [Source:HGNC Symbol;Acc:HGNC:6524]                         | chr1  | 32251239  | 32286165  | 2497 |
| IGKV2D-28 | 1.91169266  | 8.4807E-37  | 1.29213E-34 | UP     | immunoglobulin kappa variable 2D-28 [Source:HGNC Symbol;Acc:HGNC:5799]                                    | chr2  | 89960449  | 89960754  | 306  |
| IGLV3-25  | 2.162071948 | 9.24332E-37 | 1.39659E-34 | UP     | immunoglobulin lambda variable 3-25 [Source:HGNC Symbol;Acc:HGNC:5908]                                    | chr22 | 22686726  | 22687271  | 380  |
| IGLV1-47  | 2.149953798 | 9.57682E-37 | 1.43502E-34 | UP     | immunoglobulin lambda variable 1-47 [Source:HGNC Symbol;Acc:HGNC:5880]                                    | chr22 | 22357739  | 22358260  | 407  |
| IGHV3-33  | 2.066570824 | 1.32861E-36 | 1.97451E-34 | UP     | immunoglobulin heavy variable 3-33 [Source:HGNC Symbol;Acc:HGNC:5596]                                     | chr14 | 106359793 | 106360324 | 431  |
| IGHV3-49  | 2.227087512 | 1.37158E-36 | 2.02179E-34 | UP     | immunoglobulin heavy variable 3-49 [Source:HGNC Symbol;Acc:HGNC:5607]                                     | chr14 | 106556936 | 106557477 | 439  |
| TNFRSF17  | 1.573092234 | 1.47338E-36 | 2.15435E-34 | UP     | TNF receptor superfamily member 17 [Source:HGNC Symbol;Acc:HGNC:11913]                                    | chr16 | 11965107  | 11968860  | 994  |
| IGLV1-40  | 2.05860361  | 1.86795E-36 | 2.70943E-34 | UP     | immunoglobulin lambda variable 1-40 [Source:HGNC Symbol;Acc:HGNC:5877]                                    | chr22 | 22409766  | 22410282  | 407  |
| TRAV13-1  | 1.205104466 | 2.43417E-36 | 3.5027E-34  | UP     | T-cell receptor alpha variable 13-1 [Source:HGNC Symbol;Acc:HGNC:12108]                                   | chr14 | 21868839  | 21869365  | 360  |
| IGHV4-61  | 2.041927602 | 2.56063E-36 | 3.65565E-34 | UP     | immunoglobulin heavy variable 4-61 [Source:HGNC Symbol;Acc:HGNC:5655]                                     | chr14 | 106639119 | 106639657 | 457  |
| BTLA      | 1.200225658 | 3.03794E-36 | 4.3032E-34  | UP     | B and T lymphocyte associated [Source:HGNC Symbol;Acc:HGNC:21087]                                         | chr3  | 112463968 | 112499561 | 3213 |
| IGHGP     | 2.124477041 | 3.31617E-36 | 4.66089E-34 | UP     | immunoglobulin heavy constant gamma P (non-functional) [Source:HGNC Symbol;Acc:HGNC:5529]                 | chr14 | 105664633 | 105669843 | 1178 |
| IGLC3     | 1.87930523  | 4.47321E-36 | 6.09803E-34 | UP     | immunoglobulin lambda constant 3 (Kern-Oz+ marker) [Source:HGNC Symbol;Acc:HGNC:5857]                     | chr22 | 22963642  | 22968083  | 462  |
| IGKV1-16  | 2.267369296 | 4.44866E-36 | 6.15715E-34 | UP     | immunoglobulin kappa variable 1-16 [Source:HGNC Symbol;Acc:HGNC:5732]                                     | chr2  | 89099859  | 89100361  | 378  |
| DOCK2     | 0.732467667 | 4.56282E-36 | 6.2673E-34  | UP     | dedicator of cytokinesis 2 [Source:HGNC Symbol;Acc:HGNC:2988]                                             | chr5  | 169637247 | 170083382 | 6949 |
| CD37      | 0.887516611 | 4.8847E-36  | 6.65899E-34 | UP     | CD37 molecule [Source:HGNC Symbol;Acc:HGNC:1666]                                                          | chr19 | 49335396  | 49340606  | 2061 |
| FOXP3     | 0.883884163 | 5.3157E-36  | 7.19246E-34 | UP     | forkhead box P3 [Source:HGNC Symbol;Acc:HGNC:6106]                                                        | chrX  | 49250436  | 49264826  | 2647 |
| SASH3     | 0.833255128 | 6.38144E-36 | 8.57051E-34 | UP     | SAM and SH3 domain containing 3 [Source:HGNC Symbol;Acc:HGNC:15975]                                       | chrX  | 129779984 | 129795201 | 2626 |
| SLA2      | 1.013826683 | 7.29766E-36 | 9.72897E-34 | UP     | Src like adaptor 2 [Source:HGNC Symbol;Acc:HGNC:17329]                                                    | chr20 | 36612318  | 36646216  | 2757 |
| IGLV1-44  | 2.040708242 | 1.49538E-35 | 1.97903E-33 | UP     | immunoglobulin lambda variable 1-44 [Source:HGNC Symbol;Acc:HGNC:5879]                                    | chr22 | 22380766  | 22381347  | 467  |
| IGHV1-24  | 2.331496299 | 1.88075E-35 | 2.471E-33   | UP     | immunoglobulin heavy variable 1-24 [Source:HGNC Symbol;Acc:HGNC:5551]                                     | chr14 | 106276548 | 106277043 | 411  |
| CXCL10    | 1.384259695 | 2.06701E-35 | 2.69618E-33 | UP     | C-X-C motif chemokine ligand 10 [Source:HGNC Symbol;Acc:HGNC:10637]                                       | chr4  | 76021117  | 76023497  | 1176 |
| TRAV26-1  | 1.178279745 | 2.21034E-35 | 2.86255E-33 | UP     | T-cell receptor alpha variable 26-1 [Source:HGNC Symbol;Acc:HGNC:12123]                                   | chr14 | 22123318  | 22124285  | 537  |
| TRAV8-4   | 1.375169771 | 3.49742E-35 | 4.47942E-33 | UP     | T-cell receptor alpha variable 8-4 [Source:HGNC Symbol;Acc:HGNC:12149]                                    | chr14 | 21894433  | 21895030  | 469  |
| TBX21     | 1.044891884 | 3.50823E-35 | 4.47942E-33 | UP     | T-box 21 [Source:HGNC Symbol;Acc:HGNC:11599]                                                              | chr17 | 47733244  | 47746119  | 2572 |
| IGKV2-24  | 1.968348543 | 3.57681E-35 | 4.53505E-33 | UP     | immunoglobulin kappa variable 2-24 [Source:HGNC Symbol;Acc:HGNC:5781]                                     | chr2  | 89176328  | 89177160  | 390  |
| CD69      | 1.099004979 | 3.60243E-35 | 4.53581E-33 | UP     | CD69 molecule [Source:HGNC Symbol;Acc:HGNC:1694]                                                          | chr12 | 9752486   | 9760901   | 2124 |
| GWINP1    | 0.804102891 | 3.63427E-35 | 4.54434E-33 | UP     | GTPase, very large interferon inducible pseudogene 1 [Source:HGNC Symbol;Acc:HGNC:25813]                  | chr11 | 6713536   | 6746439   | 8438 |
| IGKV3D-11 | 1.873118007 | 4.38484E-35 | 5.4153E-33  | UP     | immunoglobulin kappa variable 3D-11 [Source:HGNC Symbol;Acc:HGNC:5823]                                    | chr2  | 90172802  | 90173414  | 444  |
| PIK3CG    | 0.710181609 | 4.39054E-35 | 5.4153E-33  | UP     | phosphatidylinositol-4,5-bisphosphate 3-kinase catalytic subunit gamma [Source:HGNC Symbol;Acc:HGNC:8978] | chr7  | 106865278 | 106907145 | 5526 |
| GRAP2     | 0.866663652 | 4.98823E-35 | 6.11091E-33 | UP     | GRB2-related adaptor protein 2 [Source:HGNC Symbol;Acc:HGNC:4563]                                         | chr22 | 39901082  | 39937221  | 4169 |
| IGHV3-53  | 2.172237105 | 5.59453E-35 | 6.80768E-33 | UP     | immunoglobulin heavy variable 3-53 [Source:HGNC Symbol;Acc:HGNC:5610]                                     | chr14 | 106592676 | 106593347 | 571  |
| IGLV2-8   | 2.036138195 | 6.1786E-35  | 7.46828E-33 | UP     | immunoglobulin lambda variable 2-8 [Source:HGNC Symbol;Acc:HGNC:5895]                                     | chr22 | 22822658  | 22823289  | 517  |
| RHOH      | 1.028379738 | 9.42507E-35 | 1.1317E-32  | UP     | ras homolog family member H [Source:HGNC Symbol;Acc:HGNC:686]                                             | chr4  | 40191053  | 40246967  | 5440 |
| TRBV2     | 1.228956151 | 9.64341E-35 | 1.15029E-32 | UP     | T-cell receptor beta variable 2 [Source:HGNC Symbol;Acc:HGNC:12195]                                       | chr7  | 142300924 | 142301432 | 421  |
| FCRL2     | 1.630323674 | 9.84899E-35 | 1.16714E-32 | UP     | Fc receptor like 2 [Source:HGNC Symbol;Acc:HGNC:14875]                                                    | chr1  | 157745733 | 157777132 | 3095 |
| IGLV2-23  | 2.007016918 | 1.02365E-34 | 1.20518E-32 | UP     | immunoglobulin lambda variable 2-23 [Source:HGNC Symbol;Acc:HGNC:5890]                                    | chr22 | 22697789  | 22698407  | 502  |
| IGKV1-9   | 2.193657085 | 1.21401E-34 | 1.42008E-32 | UP     | immunoglobulin kappa variable 1-9 [Source:HGNC Symbol;Acc:HGNC:5744]                                      | chr2  | 89009982  | 89010515  | 409  |
| CCR2      | 1.028467665 | 1.34423E-34 | 1.56233E-32 | UP     | C-C motif chemokine receptor 2 [Source:HGNC Symbol;Acc:HGNC:1603]                                         | chr3  | 46353734  | 46360928  | 3638 |
| IGKV1D-8  | 1.871884722 | 1.41786E-34 | 1.6374E-32  | UP     | immunoglobulin kappa variable 1D-8 [Source:HGNC Symbol;Acc:HGNC:5759]                                     | chr2  | 90220727  | 90221384  | 534  |
| TRAV9-2   | 1.286910314 | 1.48423E-34 | 1.7032E-32  | UP     | T-cell receptor alpha variable 9-2 [Source:HGNC Symbol;Acc:HGNC:12154]                                    | chr14 | 21941128  | 21941657  | 394  |
| TAGAP     | 0.806987578 | 1.58296E-34 | 1.80507E-32 | UP     | T-cell activation RhoGTPase activating protein [Source:HGNC Symbol;Acc:HGNC:15669]                        | chr6  | 159034468 | 159045152 | 4089 |
| ADAMDEC1  | 1.24548458  | 1.79237E-34 | 2.03109E-32 | UP     | ADAM like decysin 1 [Source:HGNC Symbol;Acc:HGNC:16299]                                                   | chr8  | 24384285  | 24406013  | 2348 |
| PLA2G2D   | 1.814121361 | 1.88815E-34 | 2.12634E-32 | UP     | phospholipase A2 group IID [Source:HGNC Symbol;Acc:HGNC:9033]                                             | chr1  | 20111939  | 20119566  | 2681 |
| ARHGAP9   | 0.762377258 | 1.95164E-34 | 2.18427E-32 | UP     | Rho GTPase activating protein 9 [Source:HGNC Symbol;Acc:HGNC:14130]                                       | chr12 | 57472255  | 57488814  | 3675 |
| MS4A1     | 1.807287267 | 2.17112E-34 | 2.41501E-32 | UP     | membrane spanning 4-domains A1 [Source:HGNC Symbol;Acc:HGNC:7315]                                         | chr11 | 60455809  | 60470760  | 3517 |
| TESPA1    | 0.964382188 | 2.47676E-34 | 2.73817E-32 | UP     | thymocyte expressed, positive selection associated 1 [Source:HGNC Symbol;Acc:HGNC:29109]                  | chr12 | 54948018  | 54984672  | 4670 |
| IGLV3-21  | 2.096570566 | 2.73341E-34 | 3.0036E-32  | UP     | immunoglobulin lambda variable 3-21 [Source:HGNC Symbol;Acc:HGNC:5905]                                    | chr22 | 22711689  | 22713203  | 602  |



| PARAM      | logFC       | pval        | pval.adj    | UPDOWN | desc                                                                                       | chr        | start     | end       | size |
|------------|-------------|-------------|-------------|--------|--------------------------------------------------------------------------------------------|------------|-----------|-----------|------|
| TNIP3      | 1.190815679 | 2.93313E-34 | 3.20365E-32 | UP     | TNFAIP3 interacting protein 3 [Source:HGNC Symbol;Acc:HGNC:19315]                          | chr4       | 121131408 | 121227466 | 2747 |
| SAMD3      | 0.937697146 | 3.09491E-34 | 3.36011E-32 | UP     | sterile alpha motif domain containing 3 [Source:HGNC Symbol;Acc:HGNC:21574]                | chr6       | 130144315 | 130365425 | 5923 |
| TMC8       | 0.784324188 | 3.74392E-34 | 4.04053E-32 | UP     | transmembrane channel like 8 [Source:HGNC Symbol;Acc:HGNC:20474]                           | chr17      | 78130786  | 78142968  | 4411 |
| NKG7       | 1.068126195 | 3.97447E-34 | 4.26397E-32 | UP     | natural killer cell granule protein 7 [Source:HGNC Symbol;Acc:HGNC:7830]                   | chr19      | 51371606  | 51372715  | 935  |
| TRBV19     | 1.120995484 | 4.6835E-34  | 4.99509E-32 | UP     | T-cell receptor beta variable 19 [Source:HGNC Symbol;Acc:HGNC:12194]                       | chr7       | 142618849 | 142619532 | 552  |
| IGKV1D-33  | 1.913822231 | 4.8353E-34  | 5.12683E-32 | UP     | immunoglobulin kappa variable 1D-33 [Source:HGNC Symbol;Acc:HGNC:5753]                     | chr2       | 89914261  | 89916052  | 324  |
| PRF1       | 0.964725414 | 5.05248E-34 | 5.32596E-32 | UP     | perforin 1 [Source:HGNC Symbol;Acc:HGNC:9360]                                              | chr10      | 70597348  | 70602775  | 2534 |
| ABCD2      | 0.974902546 | 5.6601E-34  | 5.93139E-32 | UP     | ATP binding cassette subfamily D member 2 [Source:HGNC Symbol;Acc:HGNC:66]                 | chr12      | 39550033  | 39619751  | 6238 |
| IGLV3-10   | 2.24995658  | 5.69225E-34 | 5.93139E-32 | UP     | immunoglobulin lambda variable 3-10 [Source:HGNC Symbol;Acc:HGNC:5897]                     | chr22      | 22811747  | 22812281  | 382  |
| ANKRD36BP2 | 1.373946178 | 7.48696E-34 | 7.75692E-32 | UP     | ankyrin repeat domain 36B pseudogene 2 [Source:HGNC Symbol;Acc:HGNC:33607]                 | chr2       | 88765807  | 88806612  | 7032 |
| KCNA3      | 1.060316186 | 7.69971E-34 | 7.93201E-32 | UP     | potassium voltage-gated channel subfamily A member 3 [Source:HGNC Symbol;Acc:HGNC:6221]    | chr1       | 110672465 | 110675033 | 2569 |
| IGHV2-5    | 2.116497629 | 8.24341E-34 | 8.44414E-32 | UP     | immunoglobulin heavy variable 2-5 [Source:HGNC Symbol;Acc:HGNC:5576]                       | chr14      | 106037902 | 106038365 | 378  |
| PTPNT      | 0.879336354 | 8.93054E-34 | 9.09661E-32 | UP     | protein tyrosine phosphatase, non-receptor type 7 [Source:HGNC Symbol;Acc:HGNC:9659]       | chr1       | 202147013 | 202161581 | 4302 |
| TRBV3-1    | 1.150648268 | 1.07103E-33 | 1.08485E-31 | UP     | T-cell receptor beta variable 3-1 [Source:HGNC Symbol;Acc:HGNC:12212]                      | chr7       | 142308542 | 142309048 | 391  |
| IGLV3-19   | 2.084549739 | 1.16599E-33 | 1.17448E-31 | UP     | immunoglobulin lambda variable 3-19 [Source:HGNC Symbol;Acc:HGNC:5903]                     | chr22      | 22720623  | 22721145  | 377  |
| SIT1       | 1.061725162 | 1.61531E-33 | 1.61808E-31 | UP     | signaling threshold regulating transmembrane adaptor 1 [Source:HGNC Symbol;Acc:HGNC:17710] | chr9       | 35649295  | 35650950  | 1326 |
| FYB1       | 0.774353435 | 1.88512E-33 | 1.87798E-31 | UP     | FYN binding protein 1 [Source:HGNC Symbol;Acc:HGNC:4036]                                   | chr5       | 39105236  | 39270657  | 5017 |
| TNFRSF13B  | 1.466270847 | 2.20544E-33 | 2.18507E-31 | UP     | TNF receptor superfamily member 13B [Source:HGNC Symbol;Acc:HGNC:18153]                    | chr17      | 16933065  | 16927118  | 1499 |
| TRAV17     | 1.042772949 | 2.33819E-33 | 2.304E-31   | UP     | T-cell receptor alpha variable 17 [Source:HGNC Symbol;Acc:HGNC:12113]                      | chr14      | 21997539  | 21998168  | 484  |
| IGKV1-17   | 2.118598777 | 2.54184E-33 | 2.4858E-31  | UP     | immunoglobulin kappa variable 1-17 [Source:HGNC Symbol;Acc:HGNC:5733]                      | chr2       | 89117342  | 89117844  | 378  |
| GBP1       | 0.723980547 | 2.5501E-33  | 2.4858E-31  | UP     | guanylate binding protein 1 [Source:HGNC Symbol;Acc:HGNC:4182]                             | chr1       | 89052319  | 89065360  | 3035 |
| STAP1      | 1.303463177 | 2.68684E-33 | 2.60508E-31 | UP     | signal transducing adaptor family member 1 [Source:HGNC Symbol;Acc:HGNC:24133]             | chr4       | 67558728  | 67607337  | 1655 |
| KLRB1      | 1.076199722 | 3.34311E-33 | 3.22414E-31 | UP     | killer cell lectin like receptor B1 [Source:HGNC Symbol;Acc:HGNC:6373]                     | chr12      | 9594551   | 9607886   | 1448 |
| TRAV21     | 1.178430055 | 3.84941E-33 | 3.69278E-31 | UP     | T-cell receptor alpha variable 21 [Source:HGNC Symbol;Acc:HGNC:12118]                      | chr14      | 22052514  | 22053056  | 343  |
| TRBV4-1    | 1.354135706 | 4.8848E-33  | 4.66138E-31 | UP     | T-cell receptor beta variable 4-1 [Source:HGNC Symbol;Acc:HGNC:12215]                      | chr7       | 142313184 | 142313666 | 373  |
| IGKV3D-15  | 1.805839354 | 5.17329E-33 | 4.91083E-31 | UP     | immunoglobulin kappa variable 3D-15 (gene/pseudogene) [Source:HGNC Symbol;Acc:HGNC:5824]   | chr2       | 90114838  | 90115402  | 396  |
| FASLG      | 1.047627361 | 6.17997E-33 | 5.83589E-31 | UP     | Fas ligand [Source:HGNC Symbol;Acc:HGNC:11936]                                             | chr1       | 172659018 | 172666874 | 1888 |
| IGHV3-30   | 2.04217381  | 7.48541E-33 | 7.03202E-31 | UP     | immunoglobulin heavy variable 3-30 [Source:HGNC Symbol;Acc:HGNC:5591]                      | chr14      | 106335082 | 106335613 | 431  |
| IL21R      | 0.978731381 | 9.84845E-33 | 9.20424E-31 | UP     | interleukin 21 receptor [Source:HGNC Symbol;Acc:HGNC:6006]                                 | chr16      | 27402162  | 27452042  | 5108 |
| TBC1D10C   | 0.967186622 | 9.96155E-33 | 9.26219E-31 | UP     | TBC1 domain family member 10C [Source:HGNC Symbol;Acc:HGNC:24702]                          | chr11      | 67403915  | 67410089  | 1718 |
| TRAV3      | 1.144605254 | 1.08129E-32 | 1.00025E-30 | UP     | T-cell receptor alpha variable 3 (gene/pseudogene) [Source:HGNC Symbol;Acc:HGNC:12128]     | chr14      | 21723713  | 21724321  | 519  |
| GIMAP7     | 0.718477537 | 1.25186E-32 | 1.15215E-30 | UP     | GTPase, IMAP family member 7 [Source:HGNC Symbol;Acc:HGNC:22404]                           | chr7       | 150514830 | 150521073 | 1256 |
| CD247      | 0.880802837 | 1.27547E-32 | 1.16796E-30 | UP     | CD247 molecule [Source:HGNC Symbol;Acc:HGNC:1677]                                          | chr1       | 167430640 | 167518610 | 1681 |
| CCL19      | 1.636175049 | 1.35964E-32 | 1.23877E-30 | UP     | C-C motif chemokine ligand 19 [Source:HGNC Symbol;Acc:HGNC:10617]                          | chr9       | 34689567  | 34691277  | 760  |
| POU2AF1    | 1.451031114 | 2.00202E-32 | 1.81493E-30 | UP     | POU class 2 associating factor 1 [Source:HGNC Symbol;Acc:HGNC:9211]                        | chr11      | 111352582 | 111379692 | 3295 |
| ARHGAP15   | 0.733423427 | 2.99331E-32 | 2.70009E-30 | UP     | Rho GTPase activating protein 15 [Source:HGNC Symbol;Acc:HGNC:21030]                       | chr2       | 143091362 | 143768352 | 4345 |
| IGKV1-33   | 1.892771704 | 4.14242E-32 | 3.71813E-30 | UP     | immunoglobulin kappa variable 1-33 [Source:HGNC Symbol;Acc:HGNC:5737]                      | chr2       | 89266494  | 89268285  | 324  |
| AC233755.1 | 1.934871789 | 4.42266E-32 | 3.95011E-30 | UP     | Immunoglobulin heavy variable 4-38-2 [Source:UniProtKB/Swiss-Prot;Acc:PDP08]               | KI270726.1 | 41444     | 41876     | 351  |
| IGLV1-51   | 1.426071104 | 4.47658E-32 | 3.97867E-30 | UP     | immunoglobulin lambda variable 1-51 [Source:HGNC Symbol;Acc:HGNC:5882]                     | chr22      | 22322472  | 22322969  | 389  |
| HLA-DRA    | 0.739838739 | 5.43314E-32 | 4.80528E-30 | UP     | major histocompatibility complex, class II, DR alpha [Source:HGNC Symbol;Acc:HGNC:4947]    | chr6       | 32439842  | 32445046  | 1280 |
| IGHV4-39   | 2.051609129 | 5.99276E-32 | 5.2745E-30  | UP     | immunoglobulin heavy variable 4-39 [Source:HGNC Symbol;Acc:HGNC:5651]                      | chr14      | 106421711 | 106422218 | 425  |
| EVI2B      | 0.829095583 | 6.08811E-32 | 5.33254E-30 | UP     | ecotropic viral integration site 2B [Source:HGNC Symbol;Acc:HGNC:3500]                     | chr17      | 31303766  | 31314112  | 2072 |
| GBP4       | 0.735287725 | 6.53584E-32 | 5.69718E-30 | UP     | guanylate binding protein 4 [Source:HGNC Symbol;Acc:HGNC:20480]                            | chr1       | 89181148  | 89198932  | 6127 |
| KLRG1      | 0.882317558 | 7.45707E-32 | 6.46909E-30 | UP     | killer cell lectin like receptor G1 [Source:HGNC Symbol;Acc:HGNC:6380]                     | chr12      | 8989541   | 9010760   | 1888 |
| IGKV1-6    | 2.084584309 | 7.86899E-32 | 6.79394E-30 | UP     | immunoglobulin kappa variable 1-6 [Source:HGNC Symbol;Acc:HGNC:5742]                       | chr2       | 88966262  | 8896767   | 380  |
| NCKAP1L    | 0.690181481 | 8.27405E-32 | 7.1098E-30  | UP     | NCK associated protein 1 like [Source:HGNC Symbol;Acc:HGNC:4862]                           | chr12      | 54497711  | 54548238  | 9068 |
| CD28       | 0.847791375 | 9.68973E-32 | 8.28701E-30 | UP     | CD28 molecule [Source:HGNC Symbol;Acc:HGNC:1653]                                           | chr2       | 203706475 | 203738912 | 4885 |
| IGHV1-2    | 2.094874692 | 1.08305E-31 | 9.21913E-30 | UP     | immunoglobulin heavy variable 1-2 [Source:HGNC Symbol;Acc:HGNC:5550]                       | chr14      | 105986582 | 105987083 | 417  |
| TRGC2      | 1.190341496 | 1.11914E-31 | 9.48184E-30 | UP     | T-cell receptor gamma constant 2 [Source:HGNC Symbol;Acc:HGNC:12276]                       | chr7       | 38239580  | 38249572  | 1013 |
| IGKV3D-20  | 1.91254178  | 1.13746E-31 | 9.59221E-30 | UP     | immunoglobulin kappa variable 3D-20 [Source:HGNC Symbol;Acc:HGNC:5825]                     | chr2       | 90038848  | 90039479  | 445  |
| RASAL3     | 0.755651044 | 1.24506E-31 | 1.0451E-29  | UP     | RAS protein activator like 3 [Source:HGNC Symbol;Acc:HGNC:26129]                           | chr19      | 15451624  | 15464571  | 3293 |
| TNFRSF9    | 0.982250574 | 1.28838E-31 | 1.07648E-29 | UP     | TNF receptor superfamily member 9 [Source:HGNC Symbol;Acc:HGNC:11924]                      | chr1       | 7915894   | 7943165   | 5970 |
| TRAV12-3   | 1.213142852 | 1.51788E-31 | 1.26242E-29 | UP     | T-cell receptor alpha variable 12-3 [Source:HGNC Symbol;Acc:HGNC:12107]                    | chr14      | 21965451  | 21966061  | 399  |
| FCMR       | 1.031635856 | 1.57781E-31 | 1.30627E-29 | UP     | Fc fragment of IgM receptor [Source:HGNC Symbol;Acc:HGNC:14315]                            | chr1       | 206904386 | 206921998 | 1950 |
| CD19       | 1.592518674 | 2.01157E-31 | 1.65781E-29 | UP     | CD19 molecule [Source:HGNC Symbol;Acc:HGNC:1633]                                           | chr16      | 28931939  | 28939346  | 1957 |
| ARRDC5     | 1.050609692 | 2.89844E-31 | 2.3779E-29  | UP     | arrestin domain containing 5 [Source:HGNC Symbol;Acc:HGNC:31407]                           | chr19      | 4890437   | 4902867   | 1638 |

| PARAM      | logFC       | pval        | pval.adj    | UPDOWN | desc                                                                                             | chr   | start     | end       | size  |
|------------|-------------|-------------|-------------|--------|--------------------------------------------------------------------------------------------------|-------|-----------|-----------|-------|
| BTK        | 0.71036694  | 4.05247E-31 | 3.29486E-29 | UP     | Bruton tyrosine kinase [Source:HGNC Symbol;Acc:HGNC:1133]                                        | chrX  | 101349447 | 101390796 | 3095  |
| CD226      | 0.741933577 | 4.20633E-31 | 3.40469E-29 | UP     | CD226 molecule [Source:HGNC Symbol;Acc:HGNC:16961]                                               | chr18 | 69853275  | 69956996  | 12824 |
| PTPN22     | 0.767815286 | 5.50911E-31 | 4.41972E-29 | UP     | protein tyrosine phosphatase, non-receptor type 22 [Source:HGNC Symbol;Acc:HGNC:9652]            | chr1  | 113813811 | 113871759 | 3932  |
| LTB        | 1.039852185 | 6.26919E-31 | 5.00734E-29 | UP     | lymphotoxin beta [Source:HGNC Symbol;Acc:HGNC:6711]                                              | chr6  | 31580555  | 31582427  | 899   |
| IGHV4-28   | 1.801666178 | 9.02525E-31 | 7.17705E-29 | UP     | immunoglobulin heavy variable 4-28 [Source:HGNC Symbol;Acc:HGNC:5645]                            | chr14 | 106324254 | 106324760 | 425   |
| STAT4      | 0.694000344 | 9.80633E-31 | 7.76413E-29 | UP     | signal transducer and activator of transcription 4 [Source:HGNC Symbol;Acc:HGNC:11365]           | chr2  | 191029576 | 191151590 | 3493  |
| FLT3       | 1.043589715 | 1.0066E-30  | 7.93511E-29 | UP     | fms related tyrosine kinase 3 [Source:HGNC Symbol;Acc:HGNC:3765]                                 | chr13 | 28003274  | 28100592  | 3842  |
| GPR65      | 0.708001015 | 1.31201E-30 | 1.02979E-28 | UP     | G protein-coupled receptor 65 [Source:HGNC Symbol;Acc:HGNC:4517]                                 | chr14 | 88005124  | 88014811  | 4522  |
| IGKV3-7    | 1.676528798 | 1.44154E-30 | 1.12658E-28 | UP     | immunoglobulin kappa variable 3-7 (non-functional) [Source:HGNC Symbol;Acc:HGNC:5821]            | chr2  | 88978468  | 88979081  | 445   |
| HCST       | 0.780164559 | 2.67872E-30 | 2.08445E-28 | UP     | hematopoietic cell signal transducer [Source:HGNC Symbol;Acc:HGNC:16977]                         | chr19 | 35902480  | 35904377  | 613   |
| PIM2       | 0.814513959 | 2.86742E-30 | 2.22176E-28 | UP     | Pim-2 proto-oncogene, serine/threonine kinase [Source:HGNC Symbol;Acc:HGNC:8987]                 | chrX  | 48913182  | 48919024  | 2075  |
| SELL       | 0.952059338 | 3.16776E-30 | 2.44403E-28 | UP     | selectin L [Source:HGNC Symbol;Acc:HGNC:10720]                                                   | chr1  | 169690667 | 169711698 | 2436  |
| IGLV4-69   | 1.825114574 | 3.39712E-30 | 2.60988E-28 | UP     | immunoglobulin lambda variable 4-69 [Source:HGNC Symbol;Acc:HGNC:5921]                           | chr22 | 22030934  | 22031472  | 419   |
| IGHV4-31   | 2.005622017 | 3.45474E-30 | 2.64295E-28 | UP     | immunoglobulin heavy variable 4-31 [Source:HGNC Symbol;Acc:HGNC:5649]                            | chr14 | 106349283 | 106349792 | 428   |
| PVRIG      | 1.029773794 | 3.54353E-30 | 2.69949E-28 | UP     | poliovirus receptor related immunoglobulin domain containing [Source:HGNC Symbol;Acc:HGNC:32190] | chr7  | 100219236 | 100221490 | 1583  |
| IGKV1D-12  | 1.759491399 | 3.63961E-30 | 2.76107E-28 | UP     | immunoglobulin kappa variable 1D-12 [Source:HGNC Symbol;Acc:HGNC:5746]                           | chr2  | 90159840  | 90160335  | 371   |
| CORO1A     | 0.660041934 | 4.51338E-30 | 3.40967E-28 | UP     | coronin 1A [Source:HGNC Symbol;Acc:HGNC:2252]                                                    | chr16 | 30183422  | 30189076  | 1921  |
| IGHV3-74   | 1.664125543 | 5.21324E-30 | 3.92205E-28 | UP     | immunoglobulin heavy variable 3-74 [Source:HGNC Symbol;Acc:HGNC:5624]                            | chr14 | 106810442 | 106811131 | 587   |
| IL2RG      | 0.865594368 | 5.86833E-30 | 4.39664E-28 | UP     | interleukin 2 receptor subunit gamma [Source:HGNC Symbol;Acc:HGNC:6010]                          | chrX  | 71107404  | 71111631  | 1534  |
| BLK        | 1.518867764 | 6.75407E-30 | 5.03943E-28 | UP     | BLK proto-oncogene, Src family tyrosine kinase [Source:HGNC Symbol;Acc:HGNC:1057]                | chr8  | 11494001  | 11564604  | 2606  |
| DENN1C     | 0.75309748  | 7.68868E-30 | 5.71326E-28 | UP     | DENN domain containing 1C [Source:HGNC Symbol;Acc:HGNC:26225]                                    | chr19 | 6467207   | 6481808   | 2816  |
| KLHL6      | 0.799167923 | 8.96395E-30 | 6.63369E-28 | UP     | kelch like family member 6 [Source:HGNC Symbol;Acc:HGNC:18653]                                   | chr3  | 183487531 | 183555689 | 6298  |
| WAS        | 0.629768787 | 1.19781E-29 | 8.79251E-28 | UP     | Wiskott-Aldrich syndrome [Source:HGNC Symbol;Acc:HGNC:12731]                                     | chrX  | 48683779  | 48691427  | 1849  |
| IGHA2      | 1.619333223 | 1.2483E-29  | 9.12619E-28 | UP     | immunoglobulin heavy constant alpha 2 (A2m marker) [Source:HGNC Symbol;Acc:HGNC:5479]            | chr14 | 105583731 | 105588395 | 1320  |
| HLA-DPA1   | 0.710104272 | 1.41923E-29 | 1.03342E-27 | UP     | major histocompatibility complex, class II, DP alpha 1 [Source:HGNC Symbol;Acc:HGNC:4938]        | chr6  | 33064569  | 33080710  | 1704  |
| IGLV6-57   | 1.888170546 | 1.46219E-29 | 1.06044E-27 | UP     | immunoglobulin lambda variable 6-57 [Source:HGNC Symbol;Acc:HGNC:5927]                           | chr22 | 22195799  | 22196276  | 353   |
| IGKV2D-30  | 1.573707219 | 1.62011E-29 | 1.17029E-27 | UP     | immunoglobulin kappa variable 2D-30 [Source:HGNC Symbol;Acc:HGNC:5801]                           | chr2  | 89936859  | 89937679  | 395   |
| AC245369.3 | 1.937510394 | 1.69921E-29 | 1.22255E-27 | UP     | Immunoglobulin heavy variable 1-69D [Source:UniProtKB/Swiss-Prot;Acc:A0A0B4J2H0]                 | chr14 | 106762092 | 106762588 | 411   |
| TLR10      | 1.139426151 | 2.87124E-29 | 2.05764E-27 | UP     | toll like receptor 10 [Source:HGNC Symbol;Acc:HGNC:15634]                                        | chr4  | 38772239  | 38782990  | 4136  |
| IRF8       | 0.744892303 | 2.89405E-29 | 2.06583E-27 | UP     | interferon regulatory factor 8 [Source:HGNC Symbol;Acc:HGNC:5358]                                | chr16 | 85898803  | 85922609  | 4194  |
| CXCR5      | 1.263668259 | 2.94425E-29 | 2.09342E-27 | UP     | C-X-C motif chemokine receptor 5 [Source:HGNC Symbol;Acc:HGNC:1060]                              | chr11 | 118883766 | 118897799 | 4431  |
| LCP2       | 0.624101245 | 3.23422E-29 | 2.29061E-27 | UP     | lymphocyte cytosolic protein 2 [Source:HGNC Symbol;Acc:HGNC:6529]                                | chr5  | 170246237 | 170298227 | 4912  |
| CCL4       | 0.871093544 | 3.48761E-29 | 2.46046E-27 | UP     | C-C motif chemokine ligand 4 [Source:HGNC Symbol;Acc:HGNC:10630]                                 | chr17 | 36103590  | 36105621  | 904   |
| IGKV1-27   | 1.993826833 | 3.88471E-29 | 2.72998E-27 | UP     | immunoglobulin kappa variable 1-27 [Source:HGNC Symbol;Acc:HGNC:5735]                            | chr2  | 89213423  | 89213928  | 382   |
| IGHV2-26   | 1.917052559 | 5.90197E-29 | 4.1316E-27  | UP     | immunoglobulin heavy variable 2-26 [Source:HGNC Symbol;Acc:HGNC:5575]                            | chr14 | 106301396 | 106301862 | 381   |
| WDFY4      | 0.740544275 | 6.48453E-29 | 4.52196E-27 | UP     | WDFY family member 4 [Source:HGNC Symbol;Acc:HGNC:29323]                                         | chr10 | 48684876  | 48982956  | 10251 |
| GIMAP4     | 0.608858811 | 7.0601E-29  | 4.90447E-27 | UP     | GTPase, IMAP family member 4 [Source:HGNC Symbol;Acc:HGNC:21872]                                 | chr7  | 150567277 | 150573955 | 2102  |
| TRAV4      | 1.112999004 | 7.68416E-29 | 5.31762E-27 | UP     | T-cell receptor alpha variable 4 [Source:HGNC Symbol;Acc:HGNC:12140]                             | chr14 | 21736152  | 21736982  | 395   |
| PPP1R16B   | 0.727557975 | 8.29052E-29 | 5.71541E-27 | UP     | protein phosphatase 1 regulatory subunit 16B [Source:HGNC Symbol;Acc:HGNC:15850]                 | chr20 | 38805705  | 38923024  | 6251  |
| AC245369.7 | 1.618661048 | 8.97911E-29 | 6.16667E-27 | UP     |                                                                                                  | chr14 | 106728163 | 106728615 | 350   |
| TRAV19     | 1.06892718  | 9.08042E-29 | 6.21272E-27 | UP     | T-cell receptor alpha variable 19 [Source:HGNC Symbol;Acc:HGNC:12115]                            | chr14 | 22007512  | 22008181  | 467   |
| BIN2       | 0.667754825 | 9.51563E-29 | 6.48601E-27 | UP     | bridging integrator 2 [Source:HGNC Symbol;Acc:HGNC:1053]                                         | chr12 | 51281038  | 51324668  | 2411  |
| HLA-DPB1   | 0.684986173 | 9.57786E-29 | 6.50397E-27 | UP     | major histocompatibility complex, class II, DP beta 1 [Source:HGNC Symbol;Acc:HGNC:4940]         | chr6  | 33075926  | 33087201  | 1560  |
| HEATR9     | 1.122332865 | 1.00923E-28 | 6.82773E-27 | UP     | HEAT repeat containing 9 [Source:HGNC Symbol;Acc:HGNC:26548]                                     | chr17 | 35854951  | 35868891  | 1974  |
| IGLV3-9    | 1.997318083 | 1.02309E-28 | 6.89034E-27 | UP     | immunoglobulin lambda variable 3-9 (gene/pseudogene) [Source:HGNC Symbol;Acc:HGNC:5918]          | chr22 | 22819010  | 22819756  | 461   |
| HNRNPA1P70 | 1.150431016 | 1.02608E-28 | 6.89034E-27 | UP     | heterogeneous nuclear ribonucleoprotein A1 pseudogene 70 [Source:HGNC Symbol;Acc:HGNC:48800]     | chr12 | 68035767  | 68036853  | 1087  |
| TRAV13-2   | 1.042495722 | 1.16033E-28 | 7.76308E-27 | UP     | T-cell receptor alpha variable 13-2 [Source:HGNC Symbol;Acc:HGNC:12109]                          | chr14 | 21918188  | 21918756  | 410   |
| IGHV3-43   | 1.900210415 | 1.19481E-28 | 7.96439E-27 | UP     | immunoglobulin heavy variable 3-43 [Source:HGNC Symbol;Acc:HGNC:5604]                            | chr14 | 106470264 | 106470800 | 434   |
| IDO1       | 1.298452405 | 1.3171E-28  | 8.74738E-27 | UP     | indoleamine 2,3-dioxygenase 1 [Source:HGNC Symbol;Acc:HGNC:6059]                                 | chr8  | 39902375  | 39928431  | 2319  |
| IGHV3-13   | 1.94978312  | 1.32747E-28 | 8.7841E-27  | UP     | immunoglobulin heavy variable 3-13 [Source:HGNC Symbol;Acc:HGNC:5581]                            | chr14 | 106129540 | 106130072 | 430   |
| TRAV8-6    | 1.173731884 | 1.3458E-28  | 8.87298E-27 | UP     | T-cell receptor alpha variable 8-6 [Source:HGNC Symbol;Acc:HGNC:12151]                           | chr14 | 21978459  | 21979120  | 561   |
| SLA        | 0.711369428 | 1.56555E-28 | 1.02844E-26 | UP     | Src like adaptor [Source:HGNC Symbol;Acc:HGNC:10902]                                             | chr8  | 133036724 | 133103054 | 3609  |
| CD79B      | 1.074827299 | 1.61047E-28 | 1.05413E-26 | UP     | CD79b molecule [Source:HGNC Symbol;Acc:HGNC:1699]                                                | chr17 | 63928740  | 63932354  | 1272  |
| THEMIS2    | 0.652855591 | 1.99438E-28 | 1.30073E-26 | UP     | thymocyte selection associated family member 2 [Source:HGNC Symbol;Acc:HGNC:16839]               | chr1  | 27872543  | 27886685  | 2724  |
| FGL2       | 0.687931998 | 3.18614E-28 | 2.07054E-26 | UP     | fibrinogen like 2 [Source:HGNC Symbol;Acc:HGNC:3696]                                             | chr7  | 77193371  | 77199848  | 4604  |
| CD96       | 0.738593912 | 3.28615E-28 | 2.1279E-26  | UP     | CD96 molecule [Source:HGNC Symbol;Acc:HGNC:16892]                                                | chr3  | 111542009 | 111652372 | 4850  |

| PARAM      | logFC       | pval        | pval.adj    | UPDOWN | desc                                                                                                | chr        | start     | end       | size  |
|------------|-------------|-------------|-------------|--------|-----------------------------------------------------------------------------------------------------|------------|-----------|-----------|-------|
| CD8B       | 1.027424211 | 4.3648E-28  | 2.8163E-26  | UP     | CD8b molecule [Source:HGNC Symbol;Acc:HGNC:1707]                                                    | chr2       | 86815339  | 86861924  | 1864  |
| CAMK4      | 0.756999648 | 5.09798E-28 | 3.26613E-26 | UP     | calcium/calmodulin dependent protein kinase IV [Source:HGNC Symbol;Acc:HGNC:1464]                   | chr5       | 111223950 | 111494886 | 12262 |
| CCDC141    | 0.925147382 | 5.4192E-28  | 3.4597E-26  | UP     | coiled-coil domain containing 141 [Source:HGNC Symbol;Acc:HGNC:26821]                               | chr2       | 178873021 | 179050059 | 6960  |
| TRAV2      | 1.151638351 | 7.2743E-28  | 4.62773E-26 | UP     | T-cell receptor alpha variable 2 [Source:HGNC Symbol;Acc:HGNC:12116]                                | chr14      | 21712321  | 21712843  | 348   |
| LAG3       | 0.827437622 | 7.9089E-28  | 5.01386E-26 | UP     | lymphocyte activating 3 [Source:HGNC Symbol;Acc:HGNC:6476]                                          | chr12      | 6772519   | 6778453   | 2160  |
| IL2RA      | 0.81180655  | 9.3148E-28  | 5.88455E-26 | UP     | interleukin 2 receptor subunit alpha [Source:HGNC Symbol;Acc:HGNC:6008]                             | chr10      | 6010689   | 6062325   | 3176  |
| CLECL1     | 1.003957583 | 9.58996E-28 | 6.03734E-26 | UP     | C-type lectin like 1 [Source:HGNC Symbol;Acc:HGNC:24462]                                            | chr12      | 9718685   | 9733299   | 760   |
| ANTXRPL1   | 1.112814663 | 9.81759E-28 | 6.15926E-26 | UP     | anthrax toxin receptor-like pseudogene 1 [Source:HGNC Symbol;Acc:HGNC:45004]                        | chr10      | 46233885  | 46273557  | 1829  |
| RASGRP1    | 0.778235036 | 1.14859E-27 | 7.18107E-26 | UP     | RAS guanyl releasing protein 1 [Source:HGNC Symbol;Acc:HGNC:9878]                                   | chr15      | 38488103  | 38565575  | 5304  |
| CXCL11     | 1.373189216 | 1.21512E-27 | 7.57092E-26 | UP     | C-X-C motif chemokine ligand 11 [Source:HGNC Symbol;Acc:HGNC:10638]                                 | chr4       | 76033682  | 76041415  | 1908  |
| CD53       | 0.682829746 | 1.48115E-27 | 9.16544E-26 | UP     | CD53 molecule [Source:HGNC Symbol;Acc:HGNC:1686]                                                    | chr1       | 110873154 | 110899928 | 1505  |
| IGKV1-8    | 1.82536316  | 1.53129E-27 | 9.44348E-26 | UP     | immunoglobulin kappa variable 1-8 [Source:HGNC Symbol;Acc:HGNC:5743]                                | chr2       | 88992409  | 88992931  | 398   |
| GF1        | 0.788522298 | 2.18375E-27 | 1.34215E-25 | UP     | growth factor independent 1 transcriptional repressor [Source:HGNC Symbol;Acc:HGNC:4237]            | chr1       | 92474762  | 92486876  | 3064  |
| TRBV6-6    | 1.118214014 | 2.28085E-27 | 1.3971E-25  | UP     | T-cell receptor beta variable 6-6 [Source:HGNC Symbol;Acc:HGNC:12231]                               | chr7       | 142469537 | 142470013 | 388   |
| CD40LG     | 1.069544199 | 2.2946E-27  | 1.40078E-25 | UP     | CD40 ligand [Source:HGNC Symbol;Acc:HGNC:11935]                                                     | chrX       | 136648193 | 136660390 | 1817  |
| PDE4B      | 0.723824344 | 2.32817E-27 | 1.41651E-25 | UP     | phosphodiesterase 4B [Source:HGNC Symbol;Acc:HGNC:8781]                                             | chr1       | 65792514  | 66374579  | 6037  |
| ADA2       | 0.616793922 | 2.41123E-27 | 1.46214E-25 | UP     | adenosine deaminase 2 [Source:HGNC Symbol;Acc:HGNC:1839]                                            | chr22      | 17178790  | 17212989  | 5169  |
| CYBB       | 0.676936534 | 2.49661E-27 | 1.50887E-25 | UP     | cytochrome b-245 beta chain [Source:HGNC Symbol;Acc:HGNC:2578]                                      | chrX       | 37380011  | 37813461  | 4324  |
| PTPRCAP    | 0.727200588 | 3.0227E-27  | 1.82075E-25 | UP     | protein tyrosine phosphatase, receptor type C associated protein [Source:HGNC Symbol;Acc:HGNC:9667] | chr11      | 67435510  | 67438067  | 1292  |
| IGKV1D-16  | 1.668577793 | 3.90367E-27 | 2.34362E-25 | UP     | immunoglobulin kappa variable 1D-16 [Source:HGNC Symbol;Acc:HGNC:5748]                              | chr2       | 90100236  | 90100738  | 378   |
| IGHV3-20   | 2.029570708 | 4.4592E-27  | 2.66831E-25 | UP     | immunoglobulin heavy variable 3-20 [Source:HGNC Symbol;Acc:HGNC:5585]                               | chr14      | 106210936 | 106211453 | 415   |
| PLEK       | 0.727656015 | 5.47702E-27 | 3.26658E-25 | UP     | pleckstrin [Source:HGNC Symbol;Acc:HGNC:9070]                                                       | chr2       | 68365173  | 68397453  | 2869  |
| GPR132     | 0.74997406  | 6.15148E-27 | 3.6568E-25  | UP     | G protein-coupled receptor 132 [Source:HGNC Symbol;Acc:HGNC:17482]                                  | chr14      | 105049389 | 105065445 | 3765  |
| JAK3       | 0.602691135 | 7.44173E-27 | 4.40935E-25 | UP     | Janus kinase 3 [Source:HGNC Symbol;Acc:HGNC:6193]                                                   | chr19      | 17824786  | 17848032  | 5769  |
| CSF2RB     | 0.714005989 | 7.71208E-27 | 4.55465E-25 | UP     | colony stimulating factor 2 receptor beta common subunit [Source:HGNC Symbol;Acc:HGNC:2436]         | chr22      | 36913628  | 36940449  | 4881  |
| IGHG4      | 1.966230033 | 7.88337E-27 | 4.64069E-25 | UP     | immunoglobulin heavy constant gamma 4 (G4m marker) [Source:HGNC Symbol;Acc:HGNC:5528]               | chr14      | 105620506 | 105626066 | 2597  |
| TNFSF13B   | 0.706667478 | 8.12555E-27 | 4.76778E-25 | UP     | TNF superfamily member 13b [Source:HGNC Symbol;Acc:HGNC:11929]                                      | chr13      | 108269629 | 108308484 | 2671  |
| HLA-DOB    | 0.959480423 | 1.01846E-26 | 5.93751E-25 | UP     | major histocompatibility complex, class II, DO beta [Source:HGNC Symbol;Acc:HGNC:4937]              | chr6       | 32812763  | 32817048  | 1372  |
| TRBV6-5    | 1.198424145 | 1.02615E-26 | 5.96319E-25 | UP     | T-cell receptor beta variable 6-5 [Source:HGNC Symbol;Acc:HGNC:12230]                               | chr7       | 142450947 | 142451448 | 410   |
| TNFSF8     | 0.837544119 | 1.41649E-26 | 8.20524E-25 | UP     | TNF superfamily member 8 [Source:HGNC Symbol;Acc:HGNC:11938]                                        | chr9       | 114893343 | 114930595 | 2906  |
| PARP15     | 0.806607432 | 1.4773E-26  | 8.53024E-25 | UP     | poly(ADP-ribose) polymerase family member 15 [Source:HGNC Symbol;Acc:HGNC:26876]                    | chr3       | 122577602 | 122639047 | 5214  |
| IGHV3-66   | 1.86425425  | 1.66018E-26 | 9.55579E-25 | UP     | immunoglobulin heavy variable 3-66 [Source:HGNC Symbol;Acc:HGNC:5619]                               | chr14      | 106675017 | 106675544 | 427   |
| IGHV2-70   | 1.701200503 | 1.676E-26   | 9.61631E-25 | UP     | immunoglobulin heavy variable 2-70 [Source:HGNC Symbol;Acc:HGNC:5577]                               | chr14      | 106770577 | 106771020 | 358   |
| CD74       | 0.634658349 | 1.79116E-26 | 1.02446E-24 | UP     | CD74 molecule [Source:HGNC Symbol;Acc:HGNC:1697]                                                    | chr5       | 150401637 | 150412929 | 1674  |
| CD84       | 0.680812219 | 1.83258E-26 | 1.04486E-24 | UP     | CD84 molecule [Source:HGNC Symbol;Acc:HGNC:1704]                                                    | chr1       | 160541095 | 160579516 | 8278  |
| AC141272.1 | 1.445697853 | 2.08176E-26 | 1.18321E-24 | UP     |                                                                                                     | K1270728.1 | 1270984   | 1271271   | 288   |
| CD86       | 0.633280095 | 2.19809E-26 | 1.24543E-24 | UP     | CD86 molecule [Source:HGNC Symbol;Acc:HGNC:1705]                                                    | chr3       | 122055366 | 122121139 | 2916  |
| TMEM156    | 1.007806223 | 2.27289E-26 | 1.28379E-24 | UP     | transmembrane protein 156 [Source:HGNC Symbol;Acc:HGNC:26260]                                       | chr4       | 38966744  | 39032421  | 1935  |
| MYO1G      | 0.707418166 | 2.50662E-26 | 1.41141E-24 | UP     | myosin IG [Source:HGNC Symbol;Acc:HGNC:13880]                                                       | chr7       | 44962666  | 44979098  | 3267  |
| NAP5B      | 0.957876115 | 2.62304E-26 | 1.47239E-24 | UP     | nap5in B aspartic peptidase, pseudogene [Source:HGNC Symbol;Acc:HGNC:13396]                         | chr19      | 50333796  | 50344767  | 1707  |
| IGLV2-18   | 1.819036818 | 2.8653E-26  | 1.59848E-24 | UP     | immunoglobulin lambda variable 2-18 [Source:HGNC Symbol;Acc:HGNC:5889]                              | chr22      | 22734607  | 22735089  | 367   |
| CIITA      | 0.681781715 | 3.01306E-26 | 1.67064E-24 | UP     | class II major histocompatibility complex transactivator [Source:HGNC Symbol;Acc:HGNC:7067]         | chr16      | 10877198  | 10932281  | 12001 |
| TRAV6      | 1.014087939 | 6.53763E-26 | 3.60285E-24 | UP     | T-cell receptor alpha variable 6 [Source:HGNC Symbol;Acc:HGNC:12144]                                | chr14      | 21768489  | 21769080  | 404   |
| NUGGC      | 1.16701339  | 6.68536E-26 | 3.662E-24   | UP     | nuclear GTPase, germinal center associated [Source:HGNC Symbol;Acc:HGNC:33550]                      | chr8       | 28021964  | 28083871  | 3887  |
| IGLV5-45   | 1.731234848 | 6.73307E-26 | 3.67703E-24 | UP     | immunoglobulin lambda variable 5-45 [Source:HGNC Symbol;Acc:HGNC:5924]                              | chr22      | 22375986  | 22376505  | 397   |
| IL16       | 0.652251214 | 7.7046E-26  | 4.19496E-24 | UP     | interleukin 16 [Source:HGNC Symbol;Acc:HGNC:5980]                                                   | chr15      | 81196879  | 81314058  | 9634  |
| IGLV7-43   | 1.489378987 | 1.14677E-26 | 6.22519E-24 | UP     | immunoglobulin lambda variable 7-43 [Source:HGNC Symbol;Acc:HGNC:5929]                              | chr22      | 22395018  | 22395489  | 385   |
| IGLV3-27   | 1.788621832 | 1.39539E-25 | 7.52971E-24 | UP     | immunoglobulin lambda variable 3-27 [Source:HGNC Symbol;Acc:HGNC:5910]                              | chr22      | 22668288  | 22668806  | 377   |
| SELE       | 1.125158587 | 1.41559E-25 | 7.61606E-24 | UP     | selectin E [Source:HGNC Symbol;Acc:HGNC:10718]                                                      | chr1       | 169722641 | 169734062 | 3857  |
| SELP       | 0.920090508 | 1.59465E-25 | 8.55402E-24 | UP     | selectin P [Source:HGNC Symbol;Acc:HGNC:10721]                                                      | chr1       | 169588852 | 169630193 | 3321  |
| GPR18      | 1.066214276 | 1.65098E-25 | 8.83004E-24 | UP     | G protein-coupled receptor 18 [Source:HGNC Symbol;Acc:HGNC:4472]                                    | chr13      | 99254714  | 99261744  | 1908  |
| IGLV7-46   | 1.676860033 | 2.09654E-25 | 1.11801E-23 | UP     | immunoglobulin lambda variable 7-46 [gene/pseudogene] [Source:HGNC Symbol;Acc:HGNC:5930]            | chr22      | 22369614  | 22370087  | 385   |
| P2RY8      | 0.808241723 | 2.13143E-25 | 1.13329E-23 | UP     | purinergic receptor P2Y8 [Source:HGNC Symbol;Acc:HGNC:15524]                                        | chrX       | 1462572   | 1537107   | 4198  |
| ZBTB32     | 0.937851267 | 2.26355E-25 | 1.20001E-23 | UP     | zinc finger and BTB domain containing 32 [Source:HGNC Symbol;Acc:HGNC:16763]                        | chr19      | 35704527  | 35717038  | 2068  |
| JAKMIP1    | 0.901905595 | 2.28567E-25 | 1.20821E-23 | UP     | janus kinase and microtubule interacting protein 1 [Source:HGNC Symbol;Acc:HGNC:26460]              | chr4       | 6026199   | 6200591   | 3572  |
| IGLV1-36   | 1.787752347 | 2.62195E-25 | 1.38193E-23 | UP     | immunoglobulin lambda variable 1-36 [Source:HGNC Symbol;Acc:HGNC:5876]                              | chr22      | 22431958  | 22432465  | 393   |

| PARAM      | logFC       | pval        | pval.adj    | UPDOWN | desc                                                                                          | chr        | start     | end       | size |
|------------|-------------|-------------|-------------|--------|-----------------------------------------------------------------------------------------------|------------|-----------|-----------|------|
| SELPLG     | 0.614718832 | 2.70915E-25 | 1.42375E-23 | UP     | selectin P ligand [Source:HGNC Symbol;Acc:HGNC:10722]                                         | chr12      | 108622277 | 108633959 | 2494 |
| IGKV5-2    | 1.722019268 | 2.91085E-25 | 1.52534E-23 | UP     | immunoglobulin kappa variable 5-2 [Source:HGNC Symbol;Acc:HGNC:5835]                          | chr2       | 88897232  | 88897784  | 408  |
| IL18RAP    | 0.803396397 | 3.22792E-25 | 1.68661E-23 | UP     | interleukin 18 receptor accessory protein [Source:HGNC Symbol;Acc:HGNC:5989]                  | chr2       | 102418689 | 102452565 | 2773 |
| TRAV14DV4  | 1.017937296 | 3.40618E-25 | 1.77464E-23 | UP     | T-cell receptor alpha variable 14/delta variable 4 [Source:HGNC Symbol;Acc:HGNC:12110]        | chr14      | 21924063  | 21924651  | 425  |
| FCRL1      | 1.45688804  | 3.65128E-25 | 1.89689E-23 | UP     | Fc receptor like 1 [Source:HGNC Symbol;Acc:HGNC:18509]                                        | chr1       | 157794536 | 157820105 | 2983 |
| AC233755.2 | 1.734575538 | 3.79683E-25 | 1.96686E-23 | UP     |                                                                                               | K1270726.1 | 26241     | 26534     | 294  |
| CD80       | 0.760257461 | 3.82822E-25 | 1.97748E-23 | UP     | CD80 molecule [Source:HGNC Symbol;Acc:HGNC:1700]                                              | chr3       | 119524293 | 119559602 | 2994 |
| IGKV2D-29  | 1.712790407 | 4.22746E-25 | 2.1775E-23  | UP     | immunoglobulin kappa variable 2D-29 [Source:HGNC Symbol;Acc:HGNC:5800]                        | chr2       | 89947970  | 89948279  | 310  |
| TSHR       | 1.17114634  | 5.28407E-25 | 2.71404E-23 | UP     | thyroid stimulating hormone receptor [Source:HGNC Symbol;Acc:HGNC:12373]                      | chr14      | 80955043  | 81146302  | 5158 |
| JAML       | 0.706244601 | 5.65836E-25 | 2.89807E-23 | UP     | junction adhesion molecule like [Source:HGNC Symbol;Acc:HGNC:19084]                           | chr11      | 118193740 | 118225094 | 2409 |
| BIRC3      | 0.80123221  | 6.45157E-25 | 3.29503E-23 | UP     | baculoviral IAP repeat containing 3 [Source:HGNC Symbol;Acc:HGNC:591]                         | chr11      | 102317450 | 102339403 | 6911 |
| IGHV3-73   | 1.795788225 | 6.99471E-25 | 3.56239E-23 | UP     | immunoglobulin heavy variable 3-73 [Source:HGNC Symbol;Acc:HGNC:5623]                         | chr14      | 106802694 | 106803233 | 437  |
| PSTPIP1    | 0.668450698 | 7.60155E-25 | 3.86061E-23 | UP     | proline-serine-threonine phosphatase interacting protein 1 [Source:HGNC Symbol;Acc:HGNC:9580] | chr15      | 76995085  | 77037332  | 1930 |
| SLAMF8     | 0.759694289 | 7.70894E-25 | 3.90421E-23 | UP     | SLAM family member 8 [Source:HGNC Symbol;Acc:HGNC:21391]                                      | chr1       | 159826750 | 159837249 | 2996 |
| AOAH       | 0.689853832 | 7.96533E-25 | 4.02282E-23 | UP     | acyloxyacyl hydrolase [Source:HGNC Symbol;Acc:HGNC:548]                                       | chr7       | 36512949  | 36724549  | 2551 |
| TFCF       | 0.727619972 | 8.14187E-25 | 4.10056E-23 | UP     | transcription factor EC [Source:HGNC Symbol;Acc:HGNC:11754]                                   | chr7       | 115935148 | 115959896 | 8163 |
| CD180      | 0.739342058 | 1.57631E-24 | 7.91693E-23 | UP     | CD180 molecule [Source:HGNC Symbol;Acc:HGNC:6726]                                             | chr5       | 67179613  | 67196799  | 5388 |
| FAM46C     | 0.780772736 | 1.67673E-24 | 8.39799E-23 | UP     | family with sequence similarity 46 member C [Source:HGNC Symbol;Acc:HGNC:24712]               | chr1       | 117605934 | 117628372 | 5751 |
| IGLC7      | 2.004915783 | 1.81732E-24 | 9.0771E-23  | UP     | immunoglobulin lambda constant 7 [Source:HGNC Symbol;Acc:HGNC:5861]                           | chr22      | 22922594  | 22923034  | 441  |
| CXorf21    | 0.730300019 | 1.82962E-24 | 9.1134E-23  | UP     | chromosome X open reading frame 21 [Source:HGNC Symbol;Acc:HGNC:25667]                        | chrX       | 30558824  | 30577844  | 1855 |
| IGLV9-49   | 1.414099382 | 1.85333E-24 | 9.20625E-23 | UP     | immunoglobulin lambda variable 9-49 [Source:HGNC Symbol;Acc:HGNC:5933]                        | chr22      | 22343187  | 22343732  | 409  |
| LCP1       | 0.598285242 | 2.17684E-24 | 1.07837E-22 | UP     | lymphocyte cytosolic protein 1 [Source:HGNC Symbol;Acc:HGNC:6528]                             | chr13      | 46125920  | 46211348  | 4043 |
| IGHV3-72   | 1.62858317  | 2.34278E-24 | 1.15741E-22 | UP     | immunoglobulin heavy variable 3-72 [Source:HGNC Symbol;Acc:HGNC:5622]                         | chr14      | 106790691 | 106790993 | 303  |
| IGKV1D-17  | 1.607394587 | 2.74531E-24 | 1.34892E-22 | UP     | immunoglobulin kappa variable 1D-17 [Source:HGNC Symbol;Acc:HGNC:5749]                        | chr2       | 90082635  | 90083291  | 532  |
| HLA-DOA    | 0.72660271  | 2.7539E-24  | 1.34949E-22 | UP     | major histocompatibility complex, class II, DO alpha [Source:HGNC Symbol;Acc:HGNC:4936]       | chr6       | 33004178  | 33009612  | 3489 |
| SRGN       | 0.662427622 | 2.86351E-24 | 1.39941E-22 | UP     | serglycin [Source:HGNC Symbol;Acc:HGNC:9361]                                                  | chr10      | 69088118  | 69104811  | 1208 |
| GPR15      | 1.213342877 | 2.90762E-24 | 1.41715E-22 | UP     | G protein-coupled receptor 15 [Source:HGNC Symbol;Acc:HGNC:4469]                              | chr3       | 98531899  | 98533150  | 1252 |
| ACKR1      | 1.05530988  | 2.97803E-24 | 1.44758E-22 | UP     | atypical chemokine receptor 1 (Duffy blood group) [Source:HGNC Symbol;Acc:HGNC:4035]          | chr1       | 159203307 | 159206500 | 2106 |
| LILRB4     | 0.732621263 | 3.04701E-24 | 1.47715E-22 | UP     | leukocyte immunoglobulin like receptor B4 [Source:HGNC Symbol;Acc:HGNC:6608]                  | chr19      | 54662128  | 54670359  | 4005 |
| ITGB2      | 0.6270901   | 3.17909E-24 | 1.53707E-22 | UP     | integrin subunit beta 2 [Source:HGNC Symbol;Acc:HGNC:6155]                                    | chr21      | 44885953  | 44928873  | 3500 |
| TRAV8-2    | 1.044733482 | 3.21405E-24 | 1.54984E-22 | UP     | T-cell receptor alpha variable 8-2 [Source:HGNC Symbol;Acc:HGNC:12147]                        | chr14      | 21846537  | 21847221  | 566  |
| MCOLN2     | 0.747602131 | 3.3081E-24  | 1.59096E-22 | UP     | muclolin 2 [Source:HGNC Symbol;Acc:HGNC:13357]                                                | chr1       | 84925583  | 84997112  | 2976 |
| CCL11      | 1.128781979 | 3.93601E-24 | 1.88793E-22 | UP     | C-C motif chemokine ligand 11 [Source:HGNC Symbol;Acc:HGNC:10610]                             | chr17      | 34285668  | 34288334  | 1079 |
| ZNF80      | 0.979179703 | 4.20339E-24 | 2.01046E-22 | UP     | zinc finger protein 80 [Source:HGNC Symbol;Acc:HGNC:13155]                                    | chr3       | 114234631 | 114237578 | 2948 |
| EPST11     | 0.646586418 | 4.21363E-24 | 2.01046E-22 | UP     | epithelial stromal interaction 1 [Source:HGNC Symbol;Acc:HGNC:16465]                          | chr13      | 42886388  | 42992249  | 3179 |
| IGKV6-21   | 1.49950026  | 4.68409E-24 | 2.22906E-22 | UP     | immunoglobulin kappa variable 6-21 (non-functional) [Source:HGNC Symbol;Acc:HGNC:5836]        | chr2       | 89159751  | 89160366  | 406  |
| CSF2RA     | 0.611645521 | 4.81081E-24 | 2.28337E-22 | UP     | colony stimulating factor 2 receptor alpha subunit [Source:HGNC Symbol;Acc:HGNC:2435]         | chrX       | 1268800   | 1310381   | 2892 |
| GZMM       | 0.874183291 | 6.4066E-24  | 3.03285E-22 | UP     | granzyme M [Source:HGNC Symbol;Acc:HGNC:4712]                                                 | chr19      | 544034    | 549924    | 945  |
| MS4A6A     | 0.585973017 | 1.02989E-23 | 4.85013E-22 | UP     | membrane spanning 4-domains A6A [Source:HGNC Symbol;Acc:HGNC:13375]                           | chr11      | 60172014  | 60184666  | 2767 |
| CXCR3      | 0.920315964 | 1.1683E-23  | 5.48769E-22 | UP     | C-X-C motif chemokine receptor 3 [Source:HGNC Symbol;Acc:HGNC:4540]                           | chrX       | 71615916  | 71618517  | 1868 |
| PARVG      | 0.602983393 | 1.25453E-23 | 5.8775E-22  | UP     | parvin gamma [Source:HGNC Symbol;Acc:HGNC:14654]                                              | chr22      | 44172956  | 44208469  | 4459 |
| CXCR4      | 0.658588376 | 1.33646E-23 | 6.24519E-22 | UP     | C-X-C motif chemokine receptor 4 [Source:HGNC Symbol;Acc:HGNC:2561]                           | chr2       | 136114349 | 136118165 | 2015 |
| PDCD1LG2   | 0.760423061 | 1.45787E-23 | 6.79501E-22 | UP     | programmed cell death 1 ligand 2 [Source:HGNC Symbol;Acc:HGNC:18731]                          | chr9       | 5510570   | 5571254   | 2365 |
| ZC3H12D    | 0.783753079 | 1.48413E-23 | 6.89967E-22 | UP     | zinc finger CCCH-type containing 12D [Source:HGNC Symbol;Acc:HGNC:21175]                      | chr6       | 149446795 | 149485061 | 6029 |
| IGLC6      | 1.455925502 | 1.62998E-23 | 7.55837E-22 | UP     | immunoglobulin lambda constant 6 (gene/pseudogene) [Source:HGNC Symbol;Acc:HGNC:5860]         | chr22      | 22919535  | 22919851  | 317  |
| TRBV6-1    | 1.009659297 | 1.71872E-23 | 7.94954E-22 | UP     | T-cell receptor beta variable 6-1 [Source:HGNC Symbol;Acc:HGNC:12226]                         | chr7       | 142328297 | 142328786 | 401  |
| PSMB8-AS1  | 0.596047535 | 2.15993E-23 | 9.9648E-22  | UP     | PSMB8 antisense RNA 1 (head to head) [Source:HGNC Symbol;Acc:HGNC:39758]                      | chr6       | 32844108  | 32846210  | 1349 |
| IGKV1D-13  | 1.681227511 | 2.70255E-23 | 1.24365E-21 | UP     | immunoglobulin kappa variable 1D-13 [Source:HGNC Symbol;Acc:HGNC:5747]                        | chr2       | 90154073  | 90154574  | 376  |
| RARRES3    | 0.768210849 | 2.88349E-23 | 1.32356E-21 | UP     | retinoic acid receptor responder 3 [Source:HGNC Symbol;Acc:HGNC:9869]                         | chr11      | 63536816  | 63546462  | 1271 |
| CYSLTR1    | 0.682860991 | 3.29313E-23 | 1.50777E-21 | UP     | cysteinyll leukotriene receptor 1 [Source:HGNC Symbol;Acc:HGNC:17451]                         | chrX       | 78271464  | 78327691  | 2784 |
| SCIMP      | 0.805058583 | 3.35947E-23 | 1.53427E-21 | UP     | SLP adaptor and CSK interacting membrane protein [Source:HGNC Symbol;Acc:HGNC:33504]          | chr17      | 5208961   | 5234860   | 4208 |
| TRGV9      | 0.960289338 | 3.57746E-23 | 1.62972E-21 | UP     | T-cell receptor gamma variable 9 [Source:HGNC Symbol;Acc:HGNC:12295]                          | chr7       | 38317017  | 38318861  | 1735 |
| CLEC10A    | 0.931087347 | 4.19018E-23 | 1.90406E-21 | UP     | C-type lectin domain containing 10A [Source:HGNC Symbol;Acc:HGNC:16916]                       | chr17      | 7074537   | 7080307   | 2207 |
| SPN        | 0.724674598 | 4.63876E-23 | 2.09217E-21 | UP     | sialophorin [Source:HGNC Symbol;Acc:HGNC:11249]                                               | chr16      | 29662979  | 29670490  | 6996 |
| AL645931.1 | 0.869593314 | 4.98418E-23 | 2.24239E-21 | UP     |                                                                                               | chr6       | 33079451  | 33079860  | 410  |
| GOLGA5P1   | 0.828744418 | 5.31633E-23 | 2.38001E-21 | UP     | golgin A5 pseudogene 1 [Source:HGNC Symbol;Acc:HGNC:43925]                                    | chr5       | 39169210  | 39170335  | 980  |

| PARAM       | logFC       | pval        | pval.adj    | UPDOWN | desc                                                                                                                    | chr   | start     | end       | size  |
|-------------|-------------|-------------|-------------|--------|-------------------------------------------------------------------------------------------------------------------------|-------|-----------|-----------|-------|
| FCN1        | 0.82970463  | 5.71695E-23 | 2.55306E-21 | UP     | ficolin 1 [Source:HGNC Symbol;Acc:HGNC:3623]                                                                            | chr9  | 134905890 | 134917963 | 4981  |
| IGHV1-58    | 1.651817068 | 6.37083E-23 | 2.83807E-21 | UP     | immunoglobulin heavy variable 1-58 [Source:HGNC Symbol;Acc:HGNC:5555]                                                   | chr14 | 106622357 | 106622855 | 414   |
| IFNG        | 1.036532934 | 7.03397E-23 | 3.12581E-21 | UP     | interferon gamma [Source:HGNC Symbol;Acc:HGNC:5438]                                                                     | chr12 | 68154768  | 68159747  | 1218  |
| CD274       | 0.806995511 | 7.06132E-23 | 3.13029E-21 | UP     | CD274 molecule [Source:HGNC Symbol;Acc:HGNC:17635]                                                                      | chr9  | 5450503   | 5470566   | 3685  |
| IGHV1-69    | 1.555997602 | 7.48554E-23 | 3.31025E-21 | UP     | immunoglobulin heavy variable 1-69 [Source:HGNC Symbol;Acc:HGNC:5558]                                                   | chr14 | 106714684 | 106715181 | 412   |
| TLR8        | 0.755897246 | 7.51762E-23 | 3.31635E-21 | UP     | toll like receptor 8 [Source:HGNC Symbol;Acc:HGNC:15632]                                                                | chrX  | 12906620  | 12923169  | 4353  |
| GAPT        | 0.888549222 | 7.68182E-23 | 3.38056E-21 | UP     | GRB2 binding adaptor protein, transmembrane [Source:HGNC Symbol;Acc:HGNC:26588]                                         | chr5  | 58491435  | 58497090  | 3023  |
| LYZ         | 0.812380551 | 8.41553E-23 | 3.69448E-21 | UP     | lysozyme [Source:HGNC Symbol;Acc:HGNC:6740]                                                                             | chr12 | 69348341  | 69354234  | 1764  |
| HLA-B       | 0.589702806 | 8.51781E-23 | 3.73035E-21 | UP     | major histocompatibility complex, class I, F [Source:HGNC Symbol;Acc:HGNC:4963]                                         | chr6  | 29727275  | 29727296  | 1985  |
| PSMB9       | 0.598321312 | 1.06538E-22 | 4.65456E-21 | UP     | proteasome subunit beta 9 [Source:HGNC Symbol;Acc:HGNC:9546]                                                            | chr6  | 32844136  | 32859585  | 921   |
| TRBV4-2     | 1.023032661 | 1.08211E-22 | 4.71629E-21 | UP     | T-cell receptor beta variable 4-2 [Source:HGNC Symbol;Acc:HGNC:12216]                                                   | chr7  | 142345421 | 142345985 | 455   |
| CR2         | 1.550167138 | 1.11531E-22 | 4.84934E-21 | UP     | complement C3d receptor 2 [Source:HGNC Symbol;Acc:HGNC:2336]                                                            | chr1  | 207454230 | 207489895 | 4240  |
| IGKV2D-24   | 1.212805855 | 1.37432E-22 | 5.96119E-21 | UP     | immunoglobulin kappa variable 2D-24 (non-functional) [Source:HGNC Symbol;Acc:HGNC:5797]                                 | chr2  | 90004797  | 90005629  | 390   |
| IGHV1-3     | 1.975877124 | 1.43108E-22 | 6.19259E-21 | UP     | immunoglobulin heavy variable 1-3 [Source:HGNC Symbol;Acc:HGNC:5552]                                                    | chr14 | 106005095 | 106005574 | 395   |
| FAM78A      | 0.639563465 | 1.47832E-22 | 6.38178E-21 | UP     | family with sequence similarity 78 member A [Source:HGNC Symbol;Acc:HGNC:25465]                                         | chr9  | 131258076 | 131276547 | 4350  |
| TRGC1       | 1.061047001 | 1.59404E-22 | 6.86496E-21 | UP     | T-cell receptor gamma constant 1 [Source:HGNC Symbol;Acc:HGNC:12275]                                                    | chr7  | 38257879  | 38265678  | 2730  |
| STX11       | 0.60221474  | 1.99639E-22 | 8.5774E-21  | UP     | syntaxin 11 [Source:HGNC Symbol;Acc:HGNC:11429]                                                                         | chr6  | 144150526 | 144188370 | 1926  |
| SNX20       | 0.7565035   | 2.79663E-22 | 1.19589E-20 | UP     | sorting nexin 20 [Source:HGNC Symbol;Acc:HGNC:30390]                                                                    | chr16 | 50666300  | 50681353  | 5754  |
| APBB1IP     | 0.630337491 | 3.06441E-22 | 1.30731E-20 | UP     | amyloid beta precursor protein binding family B member 1 interacting protein [Source:HGNC Symbol;Acc:HGNC:17379]        | chr10 | 26438203  | 26567803  | 3598  |
| IGHV3OR16-8 | 1.248437905 | 3.6717E-22  | 1.56271E-20 | UP     | immunoglobulin heavy variable 3/OR16-8 (non-functional) [Source:HGNC Symbol;Acc:HGNC:5643]                              | chr16 | 33009175  | 33009620  | 349   |
| PAX5        | 1.297331987 | 4.64512E-22 | 1.96777E-20 | UP     | paired box 5 [Source:HGNC Symbol;Acc:HGNC:8619]                                                                         | chr9  | 36833275  | 37034185  | 8615  |
| IGLV8-61    | 1.697040512 | 5.19894E-22 | 2.19725E-20 | UP     | immunoglobulin lambda variable 8-61 [Source:HGNC Symbol;Acc:HGNC:5931]                                                  | chr22 | 22098700  | 22099212  | 414   |
| FGF7        | 0.97774121  | 5.37149E-22 | 2.26489E-20 | UP     | fibroblast growth factor 7 [Source:HGNC Symbol;Acc:HGNC:3685]                                                           | chr15 | 49423096  | 49488775  | 6399  |
| CD22        | 0.991353006 | 5.93947E-22 | 2.49857E-20 | UP     | CD22 molecule [Source:HGNC Symbol;Acc:HGNC:1643]                                                                        | chr19 | 35329169  | 35347355  | 3289  |
| TRAV23DV6   | 0.92853464  | 6.60221E-22 | 2.76454E-20 | UP     | T-cell receptor alpha variable 23/delta variable 6 [Source:HGNC Symbol;Acc:HGNC:12120]                                  | chr14 | 22086407  | 22086961  | 409   |
| AC243829.4  | 1.124079935 | 6.9499E-22  | 2.90342E-20 | UP     |                                                                                                                         | chr17 | 36072866  | 36090134  | 1630  |
| LILRB1      | 0.643736123 | 7.7258E-22  | 3.22015E-20 | UP     | leukocyte immunoglobulin like receptor B1 [Source:HGNC Symbol;Acc:HGNC:6605]                                            | chr19 | 54617158  | 54637528  | 3504  |
| P2RX1       | 0.94930228  | 8.40212E-22 | 3.49401E-20 | UP     | purinergic receptor P2X 1 [Source:HGNC Symbol;Acc:HGNC:8533]                                                            | chr17 | 3896592   | 3916500   | 2697  |
| IKZF3       | 0.669864614 | 9.2157E-22  | 3.82357E-20 | UP     | IKAROS family zinc finger 3 [Source:HGNC Symbol;Acc:HGNC:13178]                                                         | chr17 | 39757715  | 39864188  | 10008 |
| KIR2DL4     | 1.089698782 | 1.00228E-21 | 4.14895E-20 | UP     | killer cell immunoglobulin like receptor, two Ig domains and long cytoplasmic tail 4 [Source:HGNC Symbol;Acc:HGNC:6332] | chr19 | 54803535  | 54814517  | 1657  |
| TNFAIP3     | 0.591735012 | 1.00621E-21 | 4.1557E-20  | UP     | TNF alpha induced protein 3 [Source:HGNC Symbol;Acc:HGNC:11896]                                                         | chr6  | 137867188 | 137883312 | 4738  |
| CXorf65     | 0.905703285 | 1.2403E-21  | 5.09929E-20 | UP     | chromosome X open reading frame 65 [Source:HGNC Symbol;Acc:HGNC:33713]                                                  | chrX  | 71103987  | 71106605  | 601   |
| FAM129C     | 1.104116517 | 1.31393E-21 | 5.38981E-20 | UP     | family with sequence similarity 129 member C [Source:HGNC Symbol;Acc:HGNC:24130]                                        | chr19 | 17523301  | 17553839  | 3068  |
| CLEC17A     | 1.15727308  | 1.39741E-21 | 5.71929E-20 | UP     | C-type lectin domain containing 17A [Source:HGNC Symbol;Acc:HGNC:34520]                                                 | chr19 | 14583084  | 14611157  | 2175  |
| CCR7        | 0.996538293 | 2.01668E-21 | 8.19832E-20 | UP     | C-C motif chemokine receptor 7 [Source:HGNC Symbol;Acc:HGNC:1608]                                                       | chr17 | 40553769  | 40565472  | 2508  |
| AMPD1       | 1.236339351 | 2.13655E-21 | 8.66615E-20 | UP     | adenosine monophosphate deaminase 1 [Source:HGNC Symbol;Acc:HGNC:468]                                                   | chr1  | 114673098 | 114695618 | 2407  |
| TIFA        | 0.932764368 | 2.28475E-21 | 9.24659E-20 | UP     | TIFA inhibitor [Source:HGNC Symbol;Acc:HGNC:34024]                                                                      | chr5  | 135444218 | 135452399 | 5923  |
| CLEC7A      | 0.669911377 | 2.34724E-21 | 9.47836E-20 | UP     | C-type lectin domain containing 7A [Source:HGNC Symbol;Acc:HGNC:14558]                                                  | chr12 | 10116777  | 10130257  | 3017  |
| LILRA4      | 1.062080747 | 2.5206E-21  | 1.01558E-19 | UP     | leukocyte immunoglobulin like receptor A4 [Source:HGNC Symbol;Acc:HGNC:15503]                                           | chr19 | 54333185  | 54339150  | 1944  |
| IGHD        | 1.810041618 | 2.83716E-21 | 1.14059E-19 | UP     | immunoglobulin heavy constant delta [Source:HGNC Symbol;Acc:HGNC:5480]                                                  | chr14 | 105838401 | 105845678 | 1155  |
| PRKCB       | 0.645135267 | 3.12151E-21 | 1.25213E-19 | UP     | protein kinase C beta [Source:HGNC Symbol;Acc:HGNC:9395]                                                                | chr16 | 23836001  | 24220611  | 8205  |
| TRDC        | 0.891822549 | 3.49582E-21 | 1.39918E-19 | UP     | T-cell receptor delta constant [Source:HGNC Symbol;Acc:HGNC:12253]                                                      | chr14 | 22462932  | 22465787  | 720   |
| HLA-DMB     | 0.612052693 | 5.03149E-21 | 2.00497E-19 | UP     | major histocompatibility complex, class II, DM beta [Source:HGNC Symbol;Acc:HGNC:4935]                                  | chr6  | 32934629  | 32941070  | 1397  |
| TRBV9       | 0.910100435 | 5.08824E-21 | 2.02203E-19 | UP     | T-cell receptor beta variable 9 [Source:HGNC Symbol;Acc:HGNC:12246]                                                     | chr7  | 142391891 | 142392412 | 390   |
| KLRD1       | 0.734917747 | 5.25817E-21 | 2.08157E-19 | UP     | killer cell lectin like receptor D1 [Source:HGNC Symbol;Acc:HGNC:6378]                                                  | chr12 | 10304446  | 10329600  | 15713 |
| UBD         | 1.143745732 | 5.82408E-21 | 2.29558E-19 | UP     | ubiquitin D [Source:HGNC Symbol;Acc:HGNC:18795]                                                                         | chr6  | 29555515  | 29559925  | 1087  |
| C1orf162    | 0.588769984 | 5.94375E-21 | 2.33766E-19 | UP     | chromosome 1 open reading frame 162 [Source:HGNC Symbol;Acc:HGNC:28344]                                                 | chr1  | 111473792 | 111478512 | 1107  |
| CARMIL2     | 0.732469679 | 7.28891E-21 | 2.8605E-19  | UP     | capping protein regulator and myosin 1 linker 2 [Source:HGNC Symbol;Acc:HGNC:27089]                                     | chr16 | 67644919  | 67657569  | 4687  |
| ASS1P1      | 0.796425499 | 9.11477E-21 | 3.55398E-19 | UP     | argininosuccinate synthetase 1 pseudogene 1 [Source:HGNC Symbol;Acc:HGNC:759]                                           | chr6  | 25023247  | 25024483  | 1237  |
| MEI1        | 0.83791133  | 1.03052E-20 | 4.00094E-19 | UP     | meiotic double-stranded break formation protein 1 [Source:HGNC Symbol;Acc:HGNC:28613]                                   | chr22 | 41699499  | 41799454  | 4053  |
| RIPOR2      | 0.686256652 | 1.18203E-20 | 4.55988E-19 | UP     | RHO family interacting cell polarization regulator 2 [Source:HGNC Symbol;Acc:HGNC:13872]                                | chr6  | 24804282  | 25042018  | 7689  |
| IGHV3-64    | 1.584583776 | 1.37501E-20 | 5.29305E-19 | UP     | immunoglobulin heavy variable 3-64 [Source:HGNC Symbol;Acc:HGNC:5617]                                                   | chr14 | 106657725 | 106658258 | 431   |
| DOK2        | 0.605464674 | 1.84776E-20 | 7.08283E-19 | UP     | docking protein 2 [Source:HGNC Symbol;Acc:HGNC:2991]                                                                    | chr18 | 21908873  | 21913860  | 1936  |
| CLEC6A      | 0.970587001 | 1.9475E-20  | 7.44938E-19 | UP     | C-type lectin domain containing 6A [Source:HGNC Symbol;Acc:HGNC:14556]                                                  | chr12 | 8455926   | 8478330   | 1682  |
| CLNK        | 0.866348024 | 2.03504E-20 | 7.76784E-19 | UP     | cytokine dependent hematopoietic cell linker [Source:HGNC Symbol;Acc:HGNC:17438]                                        | chr4  | 10486395  | 10684865  | 6206  |
| RUNX3       | 0.667394321 | 2.15762E-20 | 8.21845E-19 | UP     | run related transcription factor 3 [Source:HGNC Symbol;Acc:HGNC:10473]                                                  | chr1  | 24899511  | 24965010  | 4365  |



| PARAM       | logFC       | pval        | pval.adj    | UPDOWN | desc                                                                                              | chr   | start     | end       | size |
|-------------|-------------|-------------|-------------|--------|---------------------------------------------------------------------------------------------------|-------|-----------|-----------|------|
| LTA         | 0.857638595 | 2.29218E-20 | 8.7127E-19  | UP     | lymphotoxin alpha [Source:HGNC Symbol;Acc:HGNC:6709]                                              | chr6  | 31572054  | 31574324  | 1651 |
| HLA-DRB1    | 0.624871634 | 3.14264E-20 | 1.1846E-18  | UP     | major histocompatibility complex, class II, DR beta 1 [Source:HGNC Symbol;Acc:HGNC:4948]          | chr6  | 32578769  | 32589848  | 1229 |
| PTGDR       | 0.827575885 | 3.30669E-20 | 1.24385E-18 | UP     | prostaglandin D2 receptor [Source:HGNC Symbol;Acc:HGNC:9591]                                      | chr14 | 52267713  | 52276724  | 3033 |
| IL6         | 1.114013085 | 3.5424E-20  | 1.32976E-18 | UP     | interleukin 6 [Source:HGNC Symbol;Acc:HGNC:6018]                                                  | chr7  | 22725884  | 22723002  | 1714 |
| IGKV1D-43   | 1.295933485 | 3.93195E-20 | 1.47294E-18 | UP     | immunoglobulin kappa variable 1D-43 [Source:HGNC Symbol;Acc:HGNC:5758]                            | chr2  | 90209873  | 90210529  | 532  |
| NCF1        | 0.742568876 | 4.94828E-20 | 1.84382E-18 | UP     | neutrophil cytosolic factor 1 [Source:HGNC Symbol;Acc:HGNC:7660]                                  | chr7  | 74773962  | 74789313  | 1396 |
| MNDA        | 0.609563943 | 5.29225E-20 | 1.96627E-18 | UP     | myeloid cell nuclear differentiation antigen [Source:HGNC Symbol;Acc:HGNC:7183]                   | chr1  | 158831317 | 158849504 | 1752 |
| AC247036.4  | 1.508707467 | 5.54461E-20 | 2.05162E-18 | UP     |                                                                                                   | chr14 | 106088122 | 106088573 | 353  |
| VCAM1       | 0.709336168 | 5.71346E-20 | 2.1055E-18  | UP     | vascular cell adhesion molecule 1 [Source:HGNC Symbol;Acc:HGNC:12663]                             | chr1  | 100719742 | 100739045 | 3101 |
| IGHV10R15-2 | 1.119958179 | 8.41752E-20 | 3.0957E-18  | UP     | immunoglobulin heavy variable 1/OR15-2 (pseudogene) [Source:HGNC Symbol;Acc:HGNC:5564]            | chr15 | 19972782  | 19973218  | 353  |
| PTGDS       | 0.976368345 | 9.04755E-20 | 3.32067E-18 | UP     | prostaglandin D2 synthase [Source:HGNC Symbol;Acc:HGNC:9592]                                      | chr9  | 136977505 | 136981738 | 807  |
| BTBD6P1     | 0.977618707 | 9.09719E-20 | 3.33214E-18 | UP     | BTB domain containing 6 pseudogene 1 [Source:HGNC Symbol;Acc:HGNC:51542]                          | chr1  | 23901471  | 23902737  | 1267 |
| NCF1B       | 0.813006585 | 1.7267E-19  | 6.29916E-18 | UP     | neutrophil cytosolic factor 1B pseudogene [Source:HGNC Symbol;Acc:HGNC:32522]                     | chr7  | 73220624  | 73235945  | 1902 |
| NLRP3       | 0.590978456 | 1.86279E-19 | 6.77662E-18 | UP     | NLR family pyrin domain containing 3 [Source:HGNC Symbol;Acc:HGNC:16400]                          | chr1  | 247416156 | 247449108 | 4499 |
| OR56B1      | 0.921468205 | 1.86506E-19 | 6.77662E-18 | UP     | olfactory receptor family 56 subfamily B member 1 [Source:HGNC Symbol;Acc:HGNC:15245]             | chr11 | 5736448   | 5738522   | 2075 |
| AC245088.3  | 0.978817446 | 1.91587E-19 | 6.93346E-18 | UP     |                                                                                                   | chr7  | 142349152 | 142349664 | 424  |
| ADGRG5      | 0.817549661 | 1.95481E-19 | 7.06028E-18 | UP     | adhesion G protein-coupled receptor G5 [Source:HGNC Symbol;Acc:HGNC:19010]                        | chr16 | 57542421  | 57577195  | 4198 |
| TOMM20P2    | 0.832338014 | 2.23452E-19 | 8.05449E-18 | UP     | TOMM20 pseudogene 2 [Source:HGNC Symbol;Acc:HGNC:50519]                                           | chr17 | 35514766  | 35515186  | 421  |
| MMRN1       | 0.874957254 | 2.34052E-19 | 8.41982E-18 | UP     | multimerin 1 [Source:HGNC Symbol;Acc:HGNC:7178]                                                   | chr4  | 89879532  | 89954629  | 5350 |
| IGHV4-55    | 1.147873977 | 2.54938E-19 | 9.15303E-18 | UP     | immunoglobulin heavy variable 4-55 (pseudogene) [Source:HGNC Symbol;Acc:HGNC:5653]                | chr14 | 106606101 | 106606551 | 368  |
| TRBV24-1    | 0.937389589 | 2.92541E-19 | 1.04617E-17 | UP     | T-cell receptor beta variable 24-1 [Source:HGNC Symbol;Acc:HGNC:12203]                            | chr7  | 142656701 | 142657213 | 381  |
| FCRL6       | 0.854154158 | 4.1912E-19  | 1.49001E-17 | UP     | Fc receptor like 6 [Source:HGNC Symbol;Acc:HGNC:31910]                                            | chr1  | 159800512 | 159816251 | 2005 |
| RGS13       | 0.957599687 | 4.69445E-19 | 1.6624E-17  | UP     | regulator of G protein signaling 13 [Source:HGNC Symbol;Acc:HGNC:9995]                            | chr1  | 192636138 | 192660306 | 1558 |
| TRAV1-2     | 0.946436991 | 5.06468E-19 | 1.78653E-17 | UP     | T-cell receptor alpha variable 1-2 [Source:HGNC Symbol;Acc:HGNC:12102]                            | chr14 | 21642889  | 21643578  | 402  |
| IL12RB2     | 0.868241213 | 5.24093E-19 | 1.84511E-17 | UP     | interleukin 12 receptor subunit beta 2 [Source:HGNC Symbol;Acc:HGNC:5972]                         | chr1  | 67307364  | 67396900  | 4128 |
| JSRP1       | 1.024376767 | 6.40778E-19 | 2.25154E-17 | UP     | junctional sarcoplasmic reticulum protein 1 [Source:HGNC Symbol;Acc:HGNC:24963]                   | chr19 | 2252252   | 2256417   | 1138 |
| DERL3       | 0.807557227 | 6.74024E-19 | 2.36378E-17 | UP     | derlin 3 [Source:HGNC Symbol;Acc:HGNC:14236]                                                      | chr22 | 23834503  | 23839012  | 3336 |
| TLR7        | 0.623028501 | 6.87359E-19 | 2.40589E-17 | UP     | toll like receptor 7 [Source:HGNC Symbol;Acc:HGNC:15631]                                          | chrX  | 12867083  | 12890380  | 5011 |
| AC079316.1  | 0.6079929   | 6.92615E-19 | 2.41961E-17 | UP     |                                                                                                   | chr12 | 104514029 | 104514439 | 411  |
| IGLV3-16    | 1.140840159 | 7.45729E-19 | 2.60015E-17 | UP     | immunoglobulin lambda variable 3-16 [Source:HGNC Symbol;Acc:HGNC:5901]                            | chr22 | 22747383  | 22747921  | 385  |
| C1QA        | 0.586196051 | 7.75057E-19 | 2.69723E-17 | UP     | complement C1q A chain [Source:HGNC Symbol;Acc:HGNC:1241]                                         | chr1  | 22636506  | 22639608  | 1173 |
| MOXD1       | 0.792706804 | 8.43524E-19 | 2.92987E-17 | UP     | monooxygenase DBH like 1 [Source:HGNC Symbol;Acc:HGNC:21063]                                      | chr6  | 132296055 | 132401545 | 5225 |
| NR4A3       | 0.868918143 | 8.57761E-19 | 2.97363E-17 | UP     | nuclear receptor subfamily 4 group A member 3 [Source:HGNC Symbol;Acc:HGNC:7982]                  | chr9  | 99821855  | 99866891  | 6314 |
| SCML4       | 0.979637134 | 1.15232E-18 | 3.97199E-17 | UP     | sex comb on midleg like 4 (Drosophila) [Source:HGNC Symbol;Acc:HGNC:21397]                        | chr6  | 107704104 | 107824317 | 4173 |
| C4orf50     | 0.861688682 | 1.21409E-18 | 4.17696E-17 | UP     | chromosome 4 open reading frame 50 [Source:HGNC Symbol;Acc:HGNC:33766]                            | chr4  | 5897591   | 6018507   | 7675 |
| MS4A2       | 0.874146633 | 1.28211E-18 | 4.39431E-17 | UP     | membrane spanning 4-domains A2 [Source:HGNC Symbol;Acc:HGNC:7316]                                 | chr11 | 60088664  | 60098466  | 3647 |
| KLRC4       | 0.912758792 | 1.61761E-18 | 5.52333E-17 | UP     | killer cell lectin like receptor C4 [Source:HGNC Symbol;Acc:HGNC:6377]                            | chr12 | 10407382  | 10409757  | 930  |
| CNR2        | 0.919416028 | 1.79296E-18 | 6.11056E-17 | UP     | cannabinoid receptor 2 [Source:HGNC Symbol;Acc:HGNC:2160]                                         | chr1  | 23870526  | 23913362  | 5254 |
| HLA-DQA2    | 1.147329748 | 1.9955E-18  | 6.7627E-17  | UP     | major histocompatibility complex, class II, DQ alpha 2 [Source:HGNC Symbol;Acc:HGNC:4943]         | chr6  | 32741342  | 32747215  | 1524 |
| CPA3        | 0.86332195  | 2.04719E-18 | 6.92493E-17 | UP     | carboxypeptidase A3 [Source:HGNC Symbol;Acc:HGNC:2298]                                            | chr3  | 148865256 | 148897196 | 1795 |
| C1QB        | 0.593294581 | 2.34037E-18 | 7.87258E-17 | UP     | complement C1q B chain [Source:HGNC Symbol;Acc:HGNC:1242]                                         | chr1  | 22652981  | 22661538  | 1254 |
| TRGV3       | 0.926274564 | 2.40205E-18 | 8.06512E-17 | UP     | T-cell receptor gamma variable 3 [Source:HGNC Symbol;Acc:HGNC:12288]                              | chr7  | 38358512  | 38359162  | 537  |
| LILRB2      | 0.586139731 | 3.04314E-18 | 1.01987E-16 | UP     | leukocyte immunoglobulin like receptor B2 [Source:HGNC Symbol;Acc:HGNC:6606]                      | chr19 | 54273821  | 54281184  | 3011 |
| LAMP3       | 0.723162389 | 3.3655E-18  | 1.12583E-16 | UP     | lysosomal associated membrane protein 3 [Source:HGNC Symbol;Acc:HGNC:14582]                       | chr3  | 183122213 | 183162911 | 3470 |
| EGR2        | 0.678988725 | 3.66773E-18 | 1.2242E-16  | UP     | early growth response 2 [Source:HGNC Symbol;Acc:HGNC:3239]                                        | chr10 | 62811996  | 62819167  | 3137 |
| GNLY        | 0.819471581 | 4.08588E-18 | 1.35929E-16 | UP     | granulysin [Source:HGNC Symbol;Acc:HGNC:4414]                                                     | chr2  | 85694291  | 85698854  | 1090 |
| PRKCC       | 0.686919828 | 4.21413E-18 | 1.39939E-16 | UP     | protein kinase C theta [Source:HGNC Symbol;Acc:HGNC:9410]                                         | chr10 | 6427143   | 6580301   | 3295 |
| RAB37       | 0.736431181 | 4.79932E-18 | 1.5908E-16  | UP     | RAB37, member RAS oncogene family [Source:HGNC Symbol;Acc:HGNC:30268]                             | chr17 | 74670578  | 74747335  | 4497 |
| CHRD12      | 1.067375519 | 4.90501E-18 | 1.62286E-16 | UP     | chordin like 2 [Source:HGNC Symbol;Acc:HGNC:24168]                                                | chr11 | 74696429  | 74731385  | 1984 |
| IGLV2-5     | 1.105378626 | 5.20055E-18 | 1.71751E-16 | UP     | immunoglobulin lambda variable 2-5 (pseudogene) [Source:HGNC Symbol;Acc:HGNC:5894]                | chr22 | 22856762  | 22857038  | 277  |
| SPOCK2      | 0.651350604 | 5.39617E-18 | 1.77887E-16 | UP     | SPARC/osteonectin, cwcv and kazal like domains proteoglycan 2 [Source:HGNC Symbol;Acc:HGNC:13564] | chr10 | 72059035  | 72089032  | 6260 |
| SIGLEC10    | 0.623141083 | 5.45565E-18 | 1.79848E-16 | UP     | sialic acid binding Ig like lectin 10 [Source:HGNC Symbol;Acc:HGNC:15620]                         | chr19 | 51410021  | 51417803  | 3394 |
| CLEC4C      | 0.961622574 | 6.82972E-18 | 2.23519E-16 | UP     | C-type lectin domain family 4 member C [Source:HGNC Symbol;Acc:HGNC:13258]                        | chr12 | 7729415   | 7751605   | 1534 |
| IGKV6D-21   | 1.127948876 | 7.55151E-18 | 2.46696E-16 | UP     | immunoglobulin kappa variable 6D-21 (non-functional) [Source:HGNC Symbol;Acc:HGNC:5837]           | chr2  | 90021567  | 90022185  | 409  |
| VPREB3      | 1.005539188 | 9.29802E-18 | 3.03206E-16 | UP     | V-set pre-B cell surrogate light chain 3 [Source:HGNC Symbol;Acc:HGNC:12710]                      | chr22 | 23752743  | 23754468  | 610  |
| IGHV4-4     | 1.699968034 | 1.0007E-17  | 3.25738E-16 | UP     | immunoglobulin heavy variable 4-4 [Source:HGNC Symbol;Acc:HGNC:5652]                              | chr14 | 106011922 | 106012420 | 417  |

| PARAM      | logFC       | pval        | pval.adj    | UPDOWN | desc                                                                                                  | chr   | start     | end       | size  |
|------------|-------------|-------------|-------------|--------|-------------------------------------------------------------------------------------------------------|-------|-----------|-----------|-------|
| AC012236.1 | 0.998732733 | 1.23562E-17 | 4.01489E-16 | UP     |                                                                                                       | chr15 | 31221999  | 31230838  | 1537  |
| CMA1       | 1.008097829 | 1.291E-17   | 4.18731E-16 | UP     | chymase 1 [Source:HGNC Symbol;Acc:HGNC:2097]                                                          | chr14 | 24505353  | 24508265  | 937   |
| SIGLEC8    | 0.794756399 | 1.35299E-17 | 4.36497E-16 | UP     | sialic acid binding Ig like lectin 8 [Source:HGNC Symbol;Acc:HGNC:10877]                              | chr19 | 51450847  | 51458456  | 3101  |
| CLECAE     | 0.839262711 | 1.41853E-17 | 4.55209E-16 | UP     | C-type lectin domain family 4 member E [Source:HGNC Symbol;Acc:HGNC:14555]                            | chr12 | 8533305   | 8540963   | 2234  |
| BCL2A1     | 0.793294097 | 1.57952E-17 | 5.05084E-16 | UP     | BCL2 related protein A1 [Source:HGNC Symbol;Acc:HGNC:991]                                             | chr15 | 79960889  | 79971446  | 1089  |
| LINC00243  | 0.762526289 | 1.88698E-17 | 6.00224E-16 | UP     | long intergenic non-protein coding RNA 243 [Source:HGNC Symbol;Acc:HGNC:30956]                        | chr6  | 30812866  | 30830659  | 2052  |
| ASB2       | 0.707355891 | 1.90288E-17 | 6.04221E-16 | UP     | ankyrin repeat and SOCS box containing 2 [Source:HGNC Symbol;Acc:HGNC:16012]                          | chr14 | 93934153  | 93976791  | 3393  |
| RGL4       | 0.77449386  | 1.96971E-17 | 6.24349E-16 | UP     | ral guanine nucleotide dissociation stimulator like 4 [Source:HGNC Symbol;Acc:HGNC:31911]             | chr22 | 23688142  | 23699176  | 3913  |
| LY86       | 0.606665307 | 2.10885E-17 | 6.67287E-16 | UP     | lymphocyte antigen 86 [Source:HGNC Symbol;Acc:HGNC:16837]                                             | chr6  | 6588108   | 6654983   | 1254  |
| EVI2A      | 0.655961993 | 2.59172E-17 | 8.1865E-16  | UP     | ecotropic viral integration site 2A [Source:HGNC Symbol;Acc:HGNC:3499]                                | chr17 | 31317560  | 31321884  | 2071  |
| HDC        | 0.836895425 | 2.71073E-17 | 8.54751E-16 | UP     | histidine decarboxylase [Source:HGNC Symbol;Acc:HGNC:4855]                                            | chr15 | 50241947  | 50266026  | 2705  |
| IL1RL1     | 0.783533469 | 3.59121E-17 | 1.12651E-15 | UP     | interleukin 1 receptor like 1 [Source:HGNC Symbol;Acc:HGNC:5998]                                      | chr2  | 102311502 | 102352037 | 4933  |
| LGALS2     | 1.051743224 | 4.48545E-17 | 1.40459E-15 | UP     | galactin 2 [Source:HGNC Symbol;Acc:HGNC:6562]                                                         | chr22 | 37570246  | 37580080  | 591   |
| CD244      | 0.687259498 | 5.81515E-17 | 1.81784E-15 | UP     | CD244 molecule [Source:HGNC Symbol;Acc:HGNC:18171]                                                    | chr1  | 160830160 | 160862855 | 2478  |
| CCL22      | 0.825151697 | 6.27009E-17 | 1.94996E-15 | UP     | C-C motif chemokine ligand 22 [Source:HGNC Symbol;Acc:HGNC:10621]                                     | chr16 | 57358772  | 57366190  | 2929  |
| P2RY6      | 0.654694237 | 7.02377E-17 | 2.18061E-15 | UP     | pyrimidinergic receptor P2Y6 [Source:HGNC Symbol;Acc:HGNC:8543]                                       | chr11 | 73264505  | 73298617  | 3940  |
| MATK       | 0.636564241 | 7.14169E-17 | 2.21343E-15 | UP     | megakaryocyte-associated tyrosine kinase [Source:HGNC Symbol;Acc:HGNC:6906]                           | chr19 | 3777970   | 3801812   | 2549  |
| A2M-AS1    | 0.626456664 | 7.49619E-17 | 2.31539E-15 | UP     | A2M antisense RNA 1 (head to head) [Source:HGNC Symbol;Acc:HGNC:27057]                                | chr12 | 9065177   | 9068060   | 2192  |
| DNAJC5B    | 0.920218957 | 7.73433E-17 | 2.38347E-15 | UP     | DnaI heat shock protein family (Hsp40) member C5 beta [Source:HGNC Symbol;Acc:HGNC:24138]             | chr8  | 66021560  | 66100526  | 1382  |
| IGKV2-40   | 1.101004761 | 7.74291E-17 | 2.38347E-15 | UP     | immunoglobulin kappa variable 2-40 [Source:HGNC Symbol;Acc:HGNC:5789]                                 | chr2  | 89330110  | 89330421  | 312   |
| ZNF683     | 0.868129746 | 7.96593E-17 | 2.44797E-15 | UP     | zinc finger protein 683 [Source:HGNC Symbol;Acc:HGNC:28495]                                           | chr1  | 26361634  | 26372775  | 1713  |
| SOCS3      | 0.588189714 | 8.93429E-17 | 2.74091E-15 | UP     | suppressor of cytokine signaling 3 [Source:HGNC Symbol;Acc:HGNC:19391]                                | chr17 | 78356778  | 78360077  | 2734  |
| APOBEC3H   | 0.651077144 | 9.31135E-17 | 2.84695E-15 | UP     | apolipoprotein B mRNA editing enzyme catalytic subunit 3H [Source:HGNC Symbol;Acc:HGNC:24100]         | chr22 | 39097224  | 39104067  | 1143  |
| IGKV2-29   | 1.390795876 | 9.37919E-17 | 2.86286E-15 | UP     | immunoglobulin kappa variable 2-29 (gene/pseudogene) [Source:HGNC Symbol;Acc:HGNC:5784]               | chr2  | 89234174  | 89234912  | 372   |
| TNFRSF18   | 0.756896699 | 9.63215E-17 | 2.93513E-15 | UP     | TNF receptor superfamily member 18 [Source:HGNC Symbol;Acc:HGNC:11914]                                | chr1  | 1203508   | 1206691   | 1370  |
| HLA-DRB6   | 0.779675797 | 1.05815E-16 | 3.20826E-15 | UP     | major histocompatibility complex, class II, DR beta 6 (pseudogene) [Source:HGNC Symbol;Acc:HGNC:4954] | chr6  | 32552713  | 32560022  | 1326  |
| CCL21      | 1.222718089 | 1.0829E-16  | 3.2778E-15  | UP     | C-C motif chemokine ligand 21 [Source:HGNC Symbol;Acc:HGNC:10620]                                     | chr9  | 34790005  | 34710124  | 924   |
| CTSG       | 0.938181089 | 1.1437E-16  | 3.45607E-15 | UP     | cathepsin G [Source:HGNC Symbol;Acc:HGNC:2532]                                                        | chr14 | 24573556  | 24576260  | 886   |
| NCR1       | 0.782084828 | 1.18341E-16 | 3.57012E-15 | UP     | natural cytotoxicity triggering receptor 1 [Source:HGNC Symbol;Acc:HGNC:6731]                         | chr19 | 54906150  | 54916140  | 1628  |
| GBP1P1     | 0.713200667 | 1.18722E-16 | 3.57567E-15 | UP     | guanylate binding protein 1 pseudogene 1 [Source:HGNC Symbol;Acc:HGNC:39561]                          | chr1  | 89407679  | 89426243  | 2352  |
| IGLV3-12   | 1.156880848 | 1.30296E-16 | 3.91126E-15 | UP     | immunoglobulin lambda variable 3-12 [Source:HGNC Symbol;Acc:HGNC:5898]                                | chr22 | 22771824  | 22772582  | 356   |
| TOX        | 0.67886377  | 1.33156E-16 | 3.9905E-15  | UP     | thymocyte selection associated high mobility group box [Source:HGNC Symbol;Acc:HGNC:18988]            | chr8  | 58805418  | 59119208  | 4131  |
| GGTA1P     | 0.603981161 | 1.70219E-16 | 5.05114E-15 | UP     | glycoprotein, alpha-galactosyltransferase 1 pseudogene [Source:HGNC Symbol;Acc:HGNC:4253]             | chr9  | 121444991 | 121500027 | 4501  |
| KLRC1      | 0.833641392 | 1.72844E-16 | 5.12064E-15 | UP     | killer cell lectin like receptor C1 [Source:HGNC Symbol;Acc:HGNC:6374]                                | chr12 | 10442264  | 10454685  | 1798  |
| CD1B       | 0.869065151 | 2.12209E-16 | 6.24603E-15 | UP     | CD1b molecule [Source:HGNC Symbol;Acc:HGNC:1635]                                                      | chr1  | 158327951 | 158331531 | 1395  |
| FCRLA      | 0.941826557 | 2.60908E-16 | 7.62989E-15 | UP     | Fc receptor like A [Source:HGNC Symbol;Acc:HGNC:18504]                                                | chr1  | 161706972 | 161714351 | 2362  |
| CD200R1    | 0.594156341 | 2.69272E-16 | 7.86179E-15 | UP     | CD200 receptor 1 [Source:HGNC Symbol;Acc:HGNC:24235]                                                  | chr3  | 112921209 | 112975122 | 3905  |
| IGHV1-45   | 1.250694173 | 3.22425E-16 | 9.3684E-15  | UP     | immunoglobulin heavy variable 1-45 [Source:HGNC Symbol;Acc:HGNC:5553]                                 | chr14 | 106506996 | 106507491 | 411   |
| RSP03      | 0.96150204  | 3.4546E-16  | 1.00217E-14 | UP     | R-spondin 3 [Source:HGNC Symbol;Acc:HGNC:20866]                                                       | chr6  | 127118604 | 127197765 | 3037  |
| CR1        | 0.65658323  | 3.59547E-16 | 1.04136E-14 | UP     | complement C3b/C4b receptor 1 (Knops blood group) [Source:HGNC Symbol;Acc:HGNC:2334]                  | chr1  | 207496157 | 207640647 | 8819  |
| HLA-DQA1   | 0.869909217 | 4.02965E-16 | 1.16526E-14 | UP     | major histocompatibility complex, class II, DQ alpha 1 [Source:HGNC Symbol;Acc:HGNC:4942]             | chr6  | 32637357  | 32643652  | 1758  |
| AIM2       | 0.868339852 | 4.64615E-16 | 1.33926E-14 | UP     | absent in melanoma 2 [Source:HGNC Symbol;Acc:HGNC:357]                                                | chr1  | 159062484 | 159076901 | 1529  |
| TRGV2      | 0.965777759 | 4.714E-16   | 1.35666E-14 | UP     | T-cell receptor gamma variable 2 [Source:HGNC Symbol;Acc:HGNC:12287]                                  | chr7  | 38362864  | 38363518  | 544   |
| IL10       | 0.724719261 | 5.01128E-16 | 1.43993E-14 | UP     | interleukin 10 [Source:HGNC Symbol;Acc:HGNC:5962]                                                     | chr1  | 206767602 | 206772494 | 1630  |
| XCR1       | 0.821794248 | 6.01562E-16 | 1.71493E-14 | UP     | X-C motif chemokine receptor 1 [Source:HGNC Symbol;Acc:HGNC:1625]                                     | chr3  | 46017024  | 46027742  | 5281  |
| CXCR2P1    | 0.976760518 | 6.78814E-16 | 1.93212E-14 | UP     | C-X-C motif chemokine receptor 2 pseudogene 1 [Source:HGNC Symbol;Acc:HGNC:6028]                      | chr2  | 218059155 | 218065729 | 2503  |
| SUSD3      | 0.633062772 | 6.89083E-16 | 1.95827E-14 | UP     | sushi domain containing 3 [Source:HGNC Symbol;Acc:HGNC:28391]                                         | chr9  | 93058688  | 93085138  | 1263  |
| TPSAB1     | 0.791694227 | 7.7626E-16  | 2.19912E-14 | UP     | trypsin alpha/beta 1 [Source:HGNC Symbol;Acc:HGNC:12019]                                              | chr16 | 1240696   | 1242554   | 1385  |
| ITM2A      | 0.591896644 | 7.85154E-16 | 2.22085E-14 | UP     | integral membrane protein 2A [Source:HGNC Symbol;Acc:HGNC:6173]                                       | chrX  | 79360384  | 79367552  | 1834  |
| COL19A1    | 0.993734207 | 7.94036E-16 | 2.24247E-14 | UP     | collagen type XIX alpha 1 chain [Source:HGNC Symbol;Acc:HGNC:2196]                                    | chr6  | 69866571  | 70209976  | 6699  |
| SECTM1     | 0.593306682 | 8.34251E-16 | 2.34873E-14 | UP     | secreted and transmembrane 1 [Source:HGNC Symbol;Acc:HGNC:10707]                                      | chr17 | 82321024  | 82333998  | 2235  |
| AC247036.6 | 1.696408648 | 9.43077E-16 | 2.63872E-14 | UP     | immunoglobulin heavy variable 5-10-1 [Source:UniProtKB/Swiss-Prot;Acc:A0A0J9YXX1]                     | chr14 | 106107972 | 106108464 | 410   |
| CR1F2      | 0.828947868 | 1.09824E-15 | 3.06341E-14 | UP     | cytokine receptor like factor 2 [Source:HGNC Symbol;Acc:HGNC:14281]                                   | chrX  | 1187549   | 1212750   | 1665  |
| SLC12A3    | 1.030318775 | 1.31093E-15 | 3.63094E-14 | UP     | solute carrier family 12 member 3 [Source:HGNC Symbol;Acc:HGNC:10912]                                 | chr16 | 56865207  | 56915850  | 5567  |
| ST8SIA1    | 0.63861525  | 1.32388E-15 | 3.65904E-14 | UP     | ST8 alpha-N-acetyl-neuraminidase alpha-2,8-sialyltransferase 1 [Source:HGNC Symbol;Acc:HGNC:10869]    | chr12 | 22193391  | 22334714  | 10930 |
| WDR64      | 0.786514647 | 1.34238E-15 | 3.70452E-14 | UP     | WD repeat domain 64 [Source:HGNC Symbol;Acc:HGNC:26570]                                               | chr1  | 241652278 | 241802133 | 4375  |

| PARAM        | logFC       | pval        | pval.adj    | UPDOWN | desc                                                                                                                      | chr   | start     | end       | size   |
|--------------|-------------|-------------|-------------|--------|---------------------------------------------------------------------------------------------------------------------------|-------|-----------|-----------|--------|
| TSPAN32      | 0.710208475 | 1.37993E-15 | 3.80236E-14 | UP     | tetraspanin 32 [Source:HGNC Symbol;Acc:HGNC:13410]                                                                        | chr11 | 2302013   | 2318200   | 1497   |
| DNAH8        | 0.840644875 | 1.54164E-15 | 4.2415E-14  | UP     | dynein axonemal heavy chain 8 [Source:HGNC Symbol;Acc:HGNC:2952]                                                          | chr6  | 38715341  | 39030529  | 14785  |
| FCER2        | 1.01217986  | 1.63408E-15 | 4.47545E-14 | UP     | Fc fragment of IgE receptor II [Source:HGNC Symbol;Acc:HGNC:3612]                                                         | chr19 | 7688758   | 7702146   | 1721   |
| ERMN         | 0.715191716 | 1.69625E-15 | 4.63871E-14 | UP     | ermin [Source:HGNC Symbol;Acc:HGNC:29208]                                                                                 | chr2  | 157318625 | 157327713 | 4186   |
| GP1BA        | 1.081702238 | 2.0822E-15  | 5.66853E-14 | UP     | glycoprotein Ib platelet alpha subunit [Source:HGNC Symbol;Acc:HGNC:4439]                                                 | chr17 | 4932297   | 4935030   | 2501   |
| KCNJ10       | 1.050086181 | 3.09171E-15 | 8.32923E-14 | UP     | potassium voltage-gated channel subfamily J member 10 [Source:HGNC Symbol;Acc:HGNC:6256]                                  | chr1  | 159998651 | 160070483 | 6575   |
| Z82206.1     | 0.696316609 | 3.10537E-15 | 8.35364E-14 | UP     |                                                                                                                           | chr22 | 39960397  | 39964718  | 1322   |
| IGLV4-60     | 1.141611815 | 3.24951E-15 | 8.72843E-14 | UP     | immunoglobulin lambda variable 4-60 [Source:HGNC Symbol;Acc:HGNC:5920]                                                    | chr22 | 22162199  | 22162681  | 362    |
| DCC          | 1.032422252 | 3.52109E-15 | 9.44391E-14 | UP     | DCC netrin 1 receptor [Source:HGNC Symbol;Acc:HGNC:2701]                                                                  | chr18 | 52340172  | 53535903  | 10517  |
| ACTC1        | 1.166817619 | 3.83777E-15 | 1.02781E-13 | UP     | actin, alpha, cardiac muscle 1 [Source:HGNC Symbol;Acc:HGNC:143]                                                          | chr15 | 34788096  | 34796139  | 4106   |
| CD1E         | 0.870637376 | 4.27684E-15 | 1.14202E-13 | UP     | CD1e molecule [Source:HGNC Symbol;Acc:HGNC:1638]                                                                          | chr1  | 158353696 | 158357553 | 2117   |
| IL5RA        | 0.844406192 | 4.90211E-15 | 1.30425E-13 | UP     | interleukin 5 receptor subunit alpha [Source:HGNC Symbol;Acc:HGNC:6017]                                                   | chr3  | 3066326   | 3110374   | 6512   |
| AC244226.1   | 1.748100124 | 5.83135E-15 | 1.54123E-13 | UP     | immunoglobulin heavy variable 7-4-1 [Source:UniProtKB/Swiss-Prot;Acc:AAOAJ9VYV3]                                          | chr14 | 106025145 | 106025630 | 402    |
| LILRA5       | 0.698457173 | 6.59553E-15 | 1.73561E-13 | UP     | leukocyte immunoglobulin like receptor A5 [Source:HGNC Symbol;Acc:HGNC:16309]                                             | chr19 | 54307070  | 54313139  | 1363   |
| AC004687.1   | 0.742528886 | 7.57337E-15 | 1.98142E-13 | UP     |                                                                                                                           | chr17 | 58330884  | 58332508  | 1625   |
| CLEC9A       | 0.764602138 | 7.67372E-15 | 2.00479E-13 | UP     | C-type lectin domain containing 9A [Source:HGNC Symbol;Acc:HGNC:26705]                                                    | chr12 | 10030677  | 10066027  | 1734   |
| CLEC4D       | 0.73672788  | 8.64208E-15 | 2.25452E-13 | UP     | C-type lectin domain family 4 member D [Source:HGNC Symbol;Acc:HGNC:14554]                                                | chr12 | 8513540   | 8522366   | 1936   |
| CYSLTR2      | 0.641075163 | 9.94475E-15 | 2.57952E-13 | UP     | cysteinyl leukotriene receptor 2 [Source:HGNC Symbol;Acc:HGNC:18274]                                                      | chr13 | 48653711  | 48711226  | 5220   |
| CHIT1        | 1.192281655 | 1.0686E-14  | 2.76782E-13 | UP     | chitinase 1 [Source:HGNC Symbol;Acc:HGNC:1936]                                                                            | chr1  | 203216079 | 203229671 | 2246   |
| PLD4         | 0.763020983 | 1.34808E-14 | 3.46696E-13 | UP     | phospholipase D family member 4 [Source:HGNC Symbol;Acc:HGNC:23792]                                                       | chr14 | 104924816 | 104937790 | 6641   |
| FUT7         | 0.750847671 | 1.37307E-14 | 3.52623E-13 | UP     | fucosyltransferase 7 [Source:HGNC Symbol;Acc:HGNC:4018]                                                                   | chr9  | 137030174 | 137033010 | 2584   |
| OR52N4       | 0.866911832 | 1.41699E-14 | 3.63387E-13 | UP     | olfactory receptor family 52 subfamily N member 4 (gene/pseudogene) [Source:HGNC Symbol;Acc:HGNC:15230]                   | chr11 | 5754243   | 5755905   | 1276   |
| KIR3DL2      | 0.91546406  | 1.4306E-14  | 3.66359E-13 | UP     | killer cell immunoglobulin like receptor, three Ig domains and long cytoplasmic tail 2 [Source:HGNC Symbol;Acc:HGNC:6339] | chr19 | 54850443  | 54867207  | 1877   |
| IL4I1        | 0.628911603 | 1.60342E-14 | 4.07165E-13 | UP     | interleukin 4 induced 1 [Source:HGNC Symbol;Acc:HGNC:19094]                                                               | chr19 | 49889654  | 49929539  | 2563   |
| CFAP54       | 0.672284801 | 1.96625E-14 | 4.9721E-13  | UP     | cilia and flagella associated protein 54 [Source:HGNC Symbol;Acc:HGNC:26456]                                              | chr12 | 96489587  | 96875555  | 9766   |
| TVP23A       | 0.700469755 | 2.54195E-14 | 6.41004E-13 | UP     | trans-golgi network vesicle protein 23 homolog A [Source:HGNC Symbol;Acc:HGNC:20398]                                      | chr16 | 10761226  | 10818785  | 3909   |
| CD300LB      | 0.645073776 | 2.64125E-14 | 6.65118E-13 | UP     | CD300 molecule like family member b [Source:HGNC Symbol;Acc:HGNC:30811]                                                   | chr17 | 74521174  | 74531474  | 2720   |
| CD1C         | 0.776521692 | 2.68708E-14 | 6.75722E-13 | UP     | CD1c molecule [Source:HGNC Symbol;Acc:HGNC:1636]                                                                          | chr1  | 158289786 | 158293630 | 1435   |
| P2RY12       | 0.7392076   | 2.6936E-14  | 6.76421E-13 | UP     | purinergic receptor P2Y12 [Source:HGNC Symbol;Acc:HGNC:18124]                                                             | chr3  | 151337380 | 151384812 | 1766   |
| VNN2         | 0.620938796 | 2.82678E-14 | 7.07906E-13 | UP     | vanin 2 [Source:HGNC Symbol;Acc:HGNC:12706]                                                                               | chr6  | 132743870 | 132763447 | 2183   |
| C11orf21     | 0.72047555  | 3.34383E-14 | 8.33935E-13 | UP     | chromosome 11 open reading frame 21 [Source:HGNC Symbol;Acc:HGNC:13231]                                                   | chr11 | 2295645   | 2302060   | 2956   |
| SIGLEC6      | 0.790094284 | 3.529E-14   | 8.77701E-13 | UP     | sialic acid binding Ig like lectin 6 [Source:HGNC Symbol;Acc:HGNC:10875]                                                  | chr19 | 51519525  | 51531856  | 2160   |
| FAM159A      | 0.692585986 | 3.57801E-14 | 8.88669E-13 | UP     | family with sequence similarity 159 member A [Source:HGNC Symbol;Acc:HGNC:28757]                                          | chr1  | 52633344  | 52657065  | 748    |
| HLA-DQB2     | 0.790616848 | 4.53469E-14 | 1.11407E-12 | UP     | major histocompatibility complex, class II, DQ beta 2 [Source:HGNC Symbol;Acc:HGNC:4945]                                  | chr6  | 32756098  | 32763534  | 2028   |
| IGKV1D-27    | 0.940488827 | 5.18299E-14 | 1.26648E-12 | UP     | immunoglobulin kappa variable 1D-27 (pseudogene) [Source:HGNC Symbol;Acc:HGNC:5751]                                       | chr2  | 89968867  | 89969335  | 335    |
| CCL18        | 0.93581151  | 5.30854E-14 | 1.29367E-12 | UP     | C-C motif chemokine ligand 18 [Source:HGNC Symbol;Acc:HGNC:10616]                                                         | chr17 | 36064280  | 36072032  | 1324   |
| GEM          | 0.592656522 | 5.68166E-14 | 1.3772E-12  | UP     | GTP binding protein overexpressed in skeletal muscle [Source:HGNC Symbol;Acc:HGNC:4234]                                   | chr8  | 94249253  | 94262350  | 2218   |
| CCL2         | 0.599777979 | 5.77928E-14 | 1.39899E-12 | UP     | C-C motif chemokine ligand 2 [Source:HGNC Symbol;Acc:HGNC:10618]                                                          | chr17 | 34255285  | 34257203  | 1123   |
| KCNA2        | 0.814110547 | 5.81716E-14 | 1.40628E-12 | UP     | potassium voltage-gated channel subfamily A member 2 [Source:HGNC Symbol;Acc:HGNC:6220]                                   | chr1  | 110593580 | 110631474 | 13238  |
| GREM1        | 0.840430504 | 5.8545E-14  | 1.41342E-12 | UP     | gremlin 1, DAN family BMP antagonist [Source:HGNC Symbol;Acc:HGNC:2001]                                                   | chr15 | 32717974  | 32745107  | 14606  |
| ITGAD        | 0.827313709 | 6.81394E-14 | 1.64287E-12 | UP     | integrin subunit alpha D [Source:HGNC Symbol;Acc:HGNC:6146]                                                               | chr16 | 31393312  | 31426505  | 3912   |
| ANKRD55      | 0.771636367 | 9.48995E-14 | 2.26398E-12 | UP     | ankyrin repeat domain 55 [Source:HGNC Symbol;Acc:HGNC:25681]                                                              | chr5  | 56099678  | 56233359  | 2689   |
| TRGV8        | 0.770902638 | 1.0384E-13  | 2.46429E-12 | UP     | T-cell receptor gamma variable 8 [Source:HGNC Symbol;Acc:HGNC:12294]                                                      | chr7  | 38330343  | 38330935  | 468    |
| CCL23        | 0.788381141 | 1.16603E-13 | 2.76356E-12 | UP     | C-C motif chemokine ligand 23 [Source:HGNC Symbol;Acc:HGNC:10622]                                                         | chr17 | 36013056  | 36017968  | 626    |
| CLEC12A      | 0.670850966 | 1.51126E-13 | 3.56778E-12 | UP     | C-type lectin domain family 12 member A [Source:HGNC Symbol;Acc:HGNC:31713]                                               | chr12 | 9951316   | 9985595   | 2302   |
| IGKV1OR2-108 | 0.922790377 | 1.5396E-13  | 3.62998E-12 | UP     | immunoglobulin kappa variable 1/OR2-108 (non-functional) [Source:HGNC Symbol;Acc:HGNC:5767]                               | chr2  | 113406396 | 113406872 | 353    |
| HLA-DRB5     | 0.66156838  | 1.59695E-13 | 3.75543E-12 | UP     | major histocompatibility complex, class II, DR beta 5 [Source:HGNC Symbol;Acc:HGNC:4953]                                  | chr6  | 32517343  | 32530287  | 1260   |
| FCGR2B       | 0.602604978 | 1.72116E-13 | 4.03705E-12 | UP     | Fc fragment of IgG receptor IIb [Source:HGNC Symbol;Acc:HGNC:3618]                                                        | chr1  | 161663147 | 161678654 | 2129   |
| DAZL         | 0.867598541 | 1.84378E-13 | 4.31906E-12 | UP     | deleted in azoospermia like [Source:HGNC Symbol;Acc:HGNC:2685]                                                            | chr3  | 16586792  | 16605499  | 3401   |
| TPSB2        | 0.72872388  | 1.9553E-13  | 4.5744E-12  | UP     | trypsin beta 2 (gene/pseudogene) [Source:HGNC Symbol;Acc:HGNC:14120]                                                      | chr16 | 1228336   | 1230184   | 1375   |
| TTN          | 0.737683566 | 1.98037E-13 | 4.62707E-12 | UP     | titin [Source:HGNC Symbol;Acc:HGNC:12403]                                                                                 | chr2  | 178525989 | 178807423 | 116859 |
| PLA1A        | 0.708389243 | 2.12155E-13 | 4.93785E-12 | UP     | phospholipase A1 member A [Source:HGNC Symbol;Acc:HGNC:17661]                                                             | chr3  | 119597842 | 119629811 | 1920   |
| ANK2         | 0.647817434 | 2.17585E-13 | 5.05774E-12 | UP     | ankyrin 2 [Source:HGNC Symbol;Acc:HGNC:493]                                                                               | chr4  | 112818109 | 113383740 | 14859  |
| P2RY14       | 0.59758596  | 2.25916E-13 | 5.23127E-12 | UP     | purinergic receptor P2Y14 [Source:HGNC Symbol;Acc:HGNC:16442]                                                             | chr3  | 151212117 | 151278467 | 2763   |
| FPR2         | 0.753807751 | 2.31347E-13 | 5.35019E-12 | UP     | formyl peptide receptor 2 [Source:HGNC Symbol;Acc:HGNC:3827]                                                              | chr19 | 51760851  | 51770526  | 3020   |
| FAM26F       | 0.613602503 | 2.68819E-13 | 6.18522E-12 | UP     | family with sequence similarity 26 member F [Source:HGNC Symbol;Acc:HGNC:33391]                                           | chr6  | 116461370 | 116463779 | 1140   |

| PARAM      | logFC       | pval        | pval.adj    | UPDOWN | desc                                                                                          | chr   | start     | end       | size  |
|------------|-------------|-------------|-------------|--------|-----------------------------------------------------------------------------------------------|-------|-----------|-----------|-------|
| SSTR2      | 0.61193005  | 2.94882E-13 | 6.76772E-12 | UP     | somatostatin receptor 2 [Source:HGNC Symbol;Acc:HGNC:11331]                                   | chr17 | 73165012  | 73176633  | 7683  |
| S100B      | 0.768362843 | 3.22673E-13 | 7.37753E-12 | UP     | S100 calcium binding protein B [Source:HGNC Symbol;Acc:HGNC:10500]                            | chr21 | 46598962  | 46605208  | 1448  |
| OLR1       | 0.76288685  | 5.35397E-13 | 1.21341E-11 | UP     | oxidized low density lipoprotein receptor 1 [Source:HGNC Symbol;Acc:HGNC:8133]                | chr12 | 10158301  | 10172138  | 2484  |
| SFRP2      | 1.013728229 | 5.68949E-13 | 1.28463E-11 | UP     | secreted frizzled related protein 2 [Source:HGNC Symbol;Acc:HGNC:10777]                       | chr4  | 153780592 | 153789120 | 2032  |
| IGF1       | 0.712299544 | 5.75164E-13 | 1.29705E-11 | UP     | insulin like growth factor 1 [Source:HGNC Symbol;Acc:HGNC:5464]                               | chr12 | 102395867 | 102480645 | 8044  |
| PLN        | 0.738895667 | 6.56196E-13 | 1.47246E-11 | UP     | phospholamban [Source:HGNC Symbol;Acc:HGNC:9080]                                              | chr6  | 118548298 | 118560730 | 2001  |
| NELL2      | 0.692625885 | 7.2401E-13  | 1.60674E-11 | UP     | neural EGFL like 2 [Source:HGNC Symbol;Acc:HGNC:7751]                                         | chr12 | 44508275  | 44913928  | 4461  |
| RARRS1     | 0.757359994 | 8.32194E-13 | 1.83558E-11 | UP     | retinoic acid receptor responder 1 [Source:HGNC Symbol;Acc:HGNC:9867]                         | chr3  | 158696892 | 158732696 | 2092  |
| GCSAM      | 0.663969911 | 8.80498E-13 | 1.93977E-11 | UP     | germinal center associated signaling and motility [Source:HGNC Symbol;Acc:HGNC:20253]         | chr3  | 112120841 | 112133305 | 3342  |
| CADM3      | 0.939127319 | 8.85958E-13 | 1.94943E-11 | UP     | cell adhesion molecule 3 [Source:HGNC Symbol;Acc:HGNC:17601]                                  | chr1  | 159171609 | 159203313 | 3847  |
| CYP1B1     | 0.726208375 | 1.07194E-12 | 2.33879E-11 | UP     | cytochrome P450 family 1 subfamily B member 1 [Source:HGNC Symbol;Acc:HGNC:2597]              | chr2  | 38067507  | 38109902  | 5488  |
| NCF1C      | 0.687943693 | 1.20701E-12 | 2.62403E-11 | UP     | neutrophil cytosolic factor 1C pseudogene [Source:HGNC Symbol;Acc:HGNC:32523]                 | chr7  | 75156639  | 75172044  | 1427  |
| HLA-DQB1   | 0.676181108 | 1.25832E-12 | 2.7225E-11  | UP     | major histocompatibility complex, class II, DQ beta 1 [Source:HGNC Symbol;Acc:HGNC:4944]      | chr6  | 32659467  | 32668383  | 1782  |
| COL4A4     | 0.744627621 | 1.31029E-12 | 2.82821E-11 | UP     | collagen type IV alpha 4 chain [Source:HGNC Symbol;Acc:HGNC:2206]                             | chr2  | 227002711 | 227164113 | 9895  |
| CR1L       | 0.772962614 | 1.48473E-12 | 3.19332E-11 | UP     | complement C3b/C4b receptor 1 like [Source:HGNC Symbol;Acc:HGNC:2335]                         | chr1  | 207645174 | 207723703 | 1788  |
| CD300E     | 0.68359838  | 1.84529E-12 | 3.94075E-11 | UP     | CD300e molecule [Source:HGNC Symbol;Acc:HGNC:28874]                                           | chr17 | 74609887  | 74623738  | 3501  |
| KIF19      | 0.704894838 | 1.94507E-12 | 4.14895E-11 | UP     | kinesin family member 19 [Source:HGNC Symbol;Acc:HGNC:26735]                                  | chr17 | 74326212  | 74355820  | 3643  |
| FCGR1A     | 0.624301976 | 3.83618E-12 | 8.0502E-11  | UP     | Fc fragment of IgG receptor Ia [Source:HGNC Symbol;Acc:HGNC:3613]                             | chr1  | 149782690 | 149792518 | 2180  |
| CHRNA6     | 0.67208407  | 4.17489E-12 | 8.73067E-11 | UP     | cholinergic receptor nicotinic alpha 6 subunit [Source:HGNC Symbol;Acc:HGNC:15963]            | chr8  | 42752620  | 42768786  | 2400  |
| CHI3L2     | 0.749350851 | 5.2553E-12  | 1.09145E-10 | UP     | chitinase 3 like 2 [Source:HGNC Symbol;Acc:HGNC:1933]                                         | chr1  | 111200771 | 111243440 | 2647  |
| KLHDC7B    | 0.86409755  | 5.39995E-12 | 1.11893E-10 | UP     | kelch domain containing 7B [Source:HGNC Symbol;Acc:HGNC:25145]                                | chr22 | 50548033  | 50551023  | 2991  |
| GCSAML     | 0.654891076 | 6.4359E-12  | 1.32301E-10 | UP     | germinal center associated signaling and motility like [Source:HGNC Symbol;Acc:HGNC:29583]    | chr1  | 247507058 | 247577690 | 4447  |
| ZNF385D    | 0.601402525 | 7.21582E-12 | 1.47497E-10 | UP     | zinc finger protein 385D [Source:HGNC Symbol;Acc:HGNC:26191]                                  | chr3  | 21412222  | 21751435  | 10699 |
| TNFRSF13C  | 0.643424232 | 7.92955E-12 | 1.61722E-10 | UP     | TNF receptor superfamily member 13C [Source:HGNC Symbol;Acc:HGNC:17755]                       | chr22 | 41922023  | 41926818  | 3944  |
| ABI3BP     | 0.628098305 | 8.29843E-12 | 1.68676E-10 | UP     | ABI family member 3 binding protein [Source:HGNC Symbol;Acc:HGNC:17265]                       | chr3  | 100749156 | 100993515 | 7460  |
| CYP19A1    | 0.83309515  | 8.40389E-12 | 1.70628E-10 | UP     | cytochrome P450 family 19 subfamily A member 1 [Source:HGNC Symbol;Acc:HGNC:2594]             | chr15 | 51208057  | 51338610  | 5694  |
| CADM3-AS1  | 0.66874243  | 8.51235E-12 | 1.72444E-10 | UP     | CADM3 antisense RNA 1 [Source:HGNC Symbol;Acc:HGNC:40812]                                     | chr1  | 159194325 | 159202512 | 5044  |
| TNFRSF8    | 0.610593199 | 8.7611E-12  | 1.77088E-10 | UP     | TNF receptor superfamily member 8 [Source:HGNC Symbol;Acc:HGNC:11923]                         | chr1  | 12063377  | 12144207  | 3738  |
| IFI44L     | 0.626220082 | 9.1242E-12  | 1.84221E-10 | UP     | interferon induced protein 44 like [Source:HGNC Symbol;Acc:HGNC:17817]                        | chr1  | 78620403  | 78646145  | 5874  |
| XIRP1      | 0.882078379 | 1.00336E-11 | 2.0146E-10  | UP     | xin actin binding repeat containing 1 [Source:HGNC Symbol;Acc:HGNC:14301]                     | chr3  | 39183210  | 39192596  | 6467  |
| TAS2R41    | 0.597920112 | 1.2846E-11  | 2.55946E-10 | UP     | taste 2 receptor member 41 [Source:HGNC Symbol;Acc:HGNC:18883]                                | chr7  | 143477873 | 143478796 | 924   |
| PI15       | 0.692264136 | 1.50342E-11 | 2.97581E-10 | UP     | peptidase inhibitor 15 [Source:HGNC Symbol;Acc:HGNC:8946]                                     | chr8  | 74824537  | 74855029  | 7156  |
| TDRD15     | 0.725381905 | 1.51611E-11 | 2.99439E-10 | UP     | tudor domain containing 15 [Source:HGNC Symbol;Acc:HGNC:45037]                                | chr2  | 21123917  | 21143272  | 6135  |
| CCL8       | 0.707370493 | 1.72434E-11 | 3.39825E-10 | UP     | C-C motif chemokine ligand 8 [Source:HGNC Symbol;Acc:HGNC:10635]                              | chr17 | 34319036  | 34321402  | 1261  |
| DPT        | 0.812190441 | 1.77898E-11 | 3.49833E-10 | UP     | dermatopontin [Source:HGNC Symbol;Acc:HGNC:3011]                                              | chr1  | 168695459 | 168729264 | 1786  |
| ISLR       | 0.588301343 | 1.85417E-11 | 3.63437E-10 | UP     | immunoglobulin superfamily containing leucine rich repeat [Source:HGNC Symbol;Acc:HGNC:6133]  | chr15 | 74173671  | 74176872  | 2524  |
| GFPT2      | 0.635817889 | 1.96533E-11 | 3.84395E-10 | UP     | glutamine-fructose-6-phosphate transaminase 2 [Source:HGNC Symbol;Acc:HGNC:4242]              | chr5  | 180300690 | 180353387 | 3093  |
| SPATC1     | 0.604981221 | 2.12067E-11 | 4.14331E-10 | UP     | spermatogenesis and centriole associated 1 [Source:HGNC Symbol;Acc:HGNC:30510]                | chr8  | 144012414 | 144047085 | 2007  |
| EGR3       | 0.585044776 | 2.15941E-11 | 4.21445E-10 | UP     | early growth response 3 [Source:HGNC Symbol;Acc:HGNC:3240]                                    | chr8  | 22687659  | 22693302  | 4449  |
| TRGV4      | 0.855658079 | 2.9486E-11  | 5.70557E-10 | UP     | T-cell receptor gamma variable 4 [Source:HGNC Symbol;Acc:HGNC:12289]                          | chr7  | 38353715  | 38354517  | 688   |
| IL22RA2    | 0.76187536  | 3.06466E-11 | 5.92381E-10 | UP     | interleukin 22 receptor subunit alpha 2 [Source:HGNC Symbol;Acc:HGNC:14901]                   | chr6  | 137143820 | 137173648 | 2897  |
| AC092068.3 | 0.647369698 | 3.6876E-11  | 7.08675E-10 | UP     |                                                                                               | chr19 | 2641838   | 2643853   | 2016  |
| CNN1       | 0.677262789 | 3.68975E-11 | 7.08675E-10 | UP     | calponin 1 [Source:HGNC Symbol;Acc:HGNC:2155]                                                 | chr19 | 11538717  | 11550323  | 1908  |
| LILRA6     | 0.588587054 | 3.92769E-11 | 7.51985E-10 | UP     | leukocyte immunoglobulin like receptor A6 [Source:HGNC Symbol;Acc:HGNC:15495]                 | chr19 | 54238549  | 54242791  | 1890  |
| CH25H      | 0.586384267 | 4.23233E-11 | 8.09455E-10 | UP     | cholesterol 25-hydroxylase [Source:HGNC Symbol;Acc:HGNC:1907]                                 | chr10 | 89205629  | 89207314  | 1686  |
| CILP       | 0.783929272 | 4.50924E-11 | 8.58793E-10 | UP     | cartilage intermediate layer protein [Source:HGNC Symbol;Acc:HGNC:1980]                       | chr15 | 65194758  | 65211488  | 5695  |
| TNXB       | 0.617346058 | 4.83976E-11 | 9.18844E-10 | UP     | tenascin XB [Source:HGNC Symbol;Acc:HGNC:11976]                                               | chr6  | 32041154  | 32049374  | 14634 |
| APOBEC3A   | 0.722405644 | 5.33805E-11 | 1.01027E-09 | UP     | apolipoprotein B mRNA editing enzyme catalytic subunit 3A [Source:HGNC Symbol;Acc:HGNC:17343] | chr22 | 38952751  | 38992778  | 1892  |
| CARD17     | 0.718834151 | 5.91451E-11 | 1.11472E-09 | UP     | caspase recruitment domain family member 17 [Source:HGNC Symbol;Acc:HGNC:33827]               | chr11 | 105092469 | 105101431 | 466   |
| HPSE2      | 0.792671309 | 6.27946E-11 | 1.18105E-09 | UP     | heparanase 2 (inactive) [Source:HGNC Symbol;Acc:HGNC:18374]                                   | chr10 | 98457077  | 99235862  | 4421  |
| CASQ2      | 0.811981088 | 7.16832E-11 | 1.33988E-09 | UP     | calsequestrin 2 [Source:HGNC Symbol;Acc:HGNC:1513]                                            | chr1  | 115700007 | 115768781 | 2674  |
| TRGV5      | 0.747638303 | 7.94005E-11 | 1.47804E-09 | UP     | T-cell receptor gamma variable 5 [Source:HGNC Symbol;Acc:HGNC:12290]                          | chr7  | 38349355  | 38350022  | 552   |
| TNC        | 0.58654382  | 8.0624E-11  | 1.49927E-09 | UP     | tenascin C [Source:HGNC Symbol;Acc:HGNC:5318]                                                 | chr9  | 115019578 | 115118257 | 9020  |
| WNT10B     | 0.61088218  | 8.20092E-11 | 1.52347E-09 | UP     | Wnt family member 10B [Source:HGNC Symbol;Acc:HGNC:12775]                                     | chr12 | 48965340  | 48971763  | 2274  |
| CCL13      | 0.719972359 | 8.97368E-11 | 1.66192E-09 | UP     | C-C motif chemokine ligand 13 [Source:HGNC Symbol;Acc:HGNC:10611]                             | chr17 | 34356452  | 34358610  | 851   |
| C4B        | 0.732476266 | 9.17259E-11 | 1.69702E-09 | UP     | complement C4B (Chido blood group) [Source:HGNC Symbol;Acc:HGNC:1324]                         | chr6  | 32014762  | 32035418  | 5460  |

| PARAM      | logFC        | pval        | pval.adj    | UPDOWN | desc                                                                                                                     | chr   | start     | end       | size  |
|------------|--------------|-------------|-------------|--------|--------------------------------------------------------------------------------------------------------------------------|-------|-----------|-----------|-------|
| NLRP7      | 0.904514679  | 9.75237E-11 | 1.79878E-09 | UP     | NLR family pyrin domain containing 7 [Source:HGNC Symbol;Acc:HGNC:22947]                                                 | chr19 | 54923509  | 54966243  | 3834  |
| CHRD1L     | 0.93528023   | 1.05246E-10 | 1.93335E-09 | UP     | chordin like 1 [Source:HGNC Symbol;Acc:HGNC:29861]                                                                       | chrX  | 110673856 | 110795819 | 3920  |
| KLRF1      | 0.599202405  | 1.07355E-10 | 1.97009E-09 | UP     | killer cell lectin like receptor F1 [Source:HGNC Symbol;Acc:HGNC:13342]                                                  | chr12 | 9827481   | 9845007   | 1241  |
| CLC        | 0.729167766  | 1.11539E-10 | 2.04274E-09 | UP     | Charcot-Leyden crystal galectin [Source:HGNC Symbol;Acc:HGNC:2014]                                                       | chr19 | 39731250  | 39738028  | 635   |
| OMG        | 0.633580663  | 1.23652E-10 | 2.26002E-09 | UP     | oligodendrocyte myelin glycoprotein [Source:HGNC Symbol;Acc:HGNC:8135]                                                   | chr17 | 31294647  | 31297411  | 1947  |
| TTC16      | 0.653548304  | 1.32541E-10 | 2.40551E-09 | UP     | tetratricopeptide repeat domain 16 [Source:HGNC Symbol;Acc:HGNC:26536]                                                   | chr9  | 127716066 | 127731600 | 2897  |
| AC245369.1 | 0.96921732   | 1.37805E-10 | 2.49855E-09 | UP     |                                                                                                                          | chr14 | 106723574 | 106724093 | 434   |
| MMP9       | 0.689469394  | 1.56428E-10 | 2.83054E-09 | UP     | matrix metalloproteinase 9 [Source:HGNC Symbol;Acc:HGNC:7176]                                                            | chr20 | 46008908  | 46016561  | 2336  |
| BCORP1     | 0.934324568  | 1.66482E-10 | 3.00346E-09 | UP     | BCL6 corepressor pseudogene 1 [Source:HGNC Symbol;Acc:HGNC:23953]                                                        | chrY  | 19455431  | 19503153  | 6862  |
| C7         | 0.980315815  | 1.95851E-10 | 3.51233E-09 | UP     | complement C7 [Source:HGNC Symbol;Acc:HGNC:1346]                                                                         | chr5  | 40909252  | 40982939  | 4257  |
| MEDAG      | 0.601219646  | 2.15352E-10 | 3.85444E-09 | UP     | mesenteric estrogen dependent adipogenesis [Source:HGNC Symbol;Acc:HGNC:25926]                                           | chr13 | 30906191  | 30925572  | 2374  |
| CCL4L2     | 0.698422906  | 3.07539E-10 | 5.4613E-09  | UP     | C-C motif chemokine ligand 4 like 2 [Source:HGNC Symbol;Acc:HGNC:24066]                                                  | chr17 | 36210924  | 36212878  | 1397  |
| FDOSP      | 1.149162028  | 3.35772E-10 | 5.92784E-09 | UP     | follicular dendritic cell secreted protein [Source:HGNC Symbol;Acc:HGNC:19215]                                           | chr4  | 70226071  | 70235252  | 566   |
| PGM5       | 0.638281386  | 3.45261E-10 | 6.08152E-09 | UP     | phosphoglucomutase 5 [Source:HGNC Symbol;Acc:HGNC:8908]                                                                  | chr9  | 68356899  | 68351061  | 3732  |
| SLC18A2    | 0.595569444  | 3.58621E-10 | 6.30054E-09 | UP     | solute carrier family 18 member A2 [Source:HGNC Symbol;Acc:HGNC:10935]                                                   | chr10 | 117241093 | 117279430 | 3852  |
| MIAT       | 0.586078185  | 3.59919E-10 | 6.31723E-09 | UP     | myocardial infarction associated transcript (non-protein coding) [Source:HGNC Symbol;Acc:HGNC:33425]                     | chr22 | 26657520  | 26676475  | 10143 |
| SDS        | 0.585064501  | 4.54657E-10 | 7.91871E-09 | UP     | serine dehydratase [Source:HGNC Symbol;Acc:HGNC:10691]                                                                   | chr12 | 113392445 | 113403888 | 1606  |
| C16orf54   | 0.654264444  | 5.6151E-10  | 9.67751E-09 | UP     | chromosome 16 open reading frame 54 [Source:HGNC Symbol;Acc:HGNC:26649]                                                  | chr16 | 29742463  | 29746006  | 2585  |
| IGLV5-37   | 0.914085456  | 7.31285E-10 | 1.24731E-08 | UP     | immunoglobulin lambda variable 5-37 [Source:HGNC Symbol;Acc:HGNC:5922]                                                   | chr22 | 22427540  | 22428035  | 374   |
| P2RX5      | 0.651359093  | 7.78986E-10 | 1.32245E-08 | UP     | purinergic receptor P2X 5 [Source:HGNC Symbol;Acc:HGNC:8536]                                                             | chr17 | 3672199   | 3696404   | 2812  |
| FMO2       | 0.732865857  | 7.8023E-10  | 1.32322E-08 | UP     | flavin containing monooxygenase 2 [Source:HGNC Symbol;Acc:HGNC:3770]                                                     | chr1  | 171185208 | 171211230 | 3851  |
| STAB2      | 0.95358505   | 9.47257E-10 | 1.59616E-08 | UP     | stabilin 2 [Source:HGNC Symbol;Acc:HGNC:18629]                                                                           | chr12 | 103587273 | 103766727 | 8251  |
| FMO1       | 0.752534148  | 1.30233E-09 | 2.15051E-08 | UP     | flavin containing monooxygenase 1 [Source:HGNC Symbol;Acc:HGNC:3769]                                                     | chr1  | 171248471 | 171285978 | 2317  |
| KLRC2      | 0.730096148  | 1.61102E-09 | 2.6291E-08  | UP     | killer cell lectin like receptor C2 [Source:HGNC Symbol;Acc:HGNC:6375]                                                   | chr12 | 10430599  | 10442300  | 1401  |
| CCL14      | 0.664759733  | 1.71402E-09 | 2.78218E-08 | UP     | C-C motif chemokine ligand 14 [Source:HGNC Symbol;Acc:HGNC:10612]                                                        | chr17 | 35983291  | 35987004  | 3269  |
| C3         | 0.594226782  | 1.86868E-09 | 3.0197E-08  | UP     | complement C3 [Source:HGNC Symbol;Acc:HGNC:1318]                                                                         | chr19 | 6677704   | 6720682   | 5263  |
| SFRP1      | 0.768265543  | 2.11104E-09 | 3.3842E-08  | UP     | secreted frizzled related protein 1 [Source:HGNC Symbol;Acc:HGNC:10776]                                                  | chr8  | 41261958  | 41309497  | 4761  |
| PHGR1      | -1.057377677 | 2.20217E-09 | 3.52405E-08 | DOWN   | proline, histidine and glycine rich 1 [Source:HGNC Symbol;Acc:HGNC:37226]                                                | chr15 | 40351033  | 40356434  | 436   |
| KRTAP5-10  | -0.675346818 | 2.42544E-09 | 3.8463E-08  | DOWN   | keratin associated protein 5-10 [Source:HGNC Symbol;Acc:HGNC:23605]                                                      | chr11 | 71565563  | 71566738  | 1176  |
| KCNQ5      | 0.695884838  | 2.48832E-09 | 3.9368E-08  | UP     | potassium voltage-gated channel subfamily Q member 5 [Source:HGNC Symbol;Acc:HGNC:6299]                                  | chr6  | 72621792  | 73198851  | 6844  |
| KLHL14     | 0.713973117  | 2.79168E-09 | 4.39375E-08 | UP     | kelch like family member 14 [Source:HGNC Symbol;Acc:HGNC:29266]                                                          | chr18 | 32672671  | 32773062  | 4871  |
| FGF10      | 0.684033435  | 3.00019E-09 | 4.70965E-08 | UP     | fibroblast growth factor 10 [Source:HGNC Symbol;Acc:HGNC:3666]                                                           | chr5  | 44303544  | 44388797  | 2193  |
| BEND4      | 0.675301109  | 3.43359E-09 | 5.35968E-08 | UP     | BEN domain containing 4 [Source:HGNC Symbol;Acc:HGNC:23815]                                                              | chr4  | 42110938  | 42152878  | 8765  |
| CHI3L1     | 0.698351361  | 3.58083E-09 | 5.57288E-08 | UP     | chitinase 3 like 1 [Source:HGNC Symbol;Acc:HGNC:1932]                                                                    | chr1  | 203178931 | 203186749 | 1792  |
| SFRP4      | 0.811331001  | 4.76217E-09 | 7.27404E-08 | UP     | secreted frizzled related protein 4 [Source:HGNC Symbol;Acc:HGNC:10778]                                                  | chr7  | 37905932  | 37916915  | 2966  |
| PI16       | 0.77944975   | 6.01472E-09 | 9.02756E-08 | UP     | peptidase inhibitor 16 [Source:HGNC Symbol;Acc:HGNC:21245]                                                               | chr6  | 36948263  | 36964837  | 2332  |
| SCN7A      | 0.78138785   | 6.34059E-09 | 9.49308E-08 | UP     | sodium voltage-gated channel alpha subunit 7 [Source:HGNC Symbol;Acc:HGNC:10594]                                         | chr2  | 166403573 | 166486971 | 7188  |
| COL4A3     | 0.750207341  | 7.71912E-09 | 1.13785E-07 | UP     | collagen type IV alpha 3 chain [Source:HGNC Symbol;Acc:HGNC:2204]                                                        | chr2  | 227164565 | 227314792 | 8097  |
| KCN52      | 0.589366645  | 7.93414E-09 | 1.1659E-07  | UP     | potassium voltage-gated channel modifier subfamily S member 2 [Source:HGNC Symbol;Acc:HGNC:6301]                         | chr8  | 98427022  | 98432848  | 5348  |
| LINC01550  | 0.6034577    | 8.66255E-09 | 1.26866E-07 | UP     | long intergenic non-protein coding RNA 1550 [Source:HGNC Symbol;Acc:HGNC:20111]                                          | chr14 | 97933062  | 97978110  | 4275  |
| TPTE2      | 0.593842695  | 9.58794E-09 | 1.38849E-07 | UP     | transmembrane phosphoinositide 3-phosphatase and tensin homolog 2 [Source:HGNC Symbol;Acc:HGNC:17299]                    | chr13 | 19422877  | 19536762  | 2160  |
| HSD17B2    | -0.701149906 | 1.15738E-08 | 1.66279E-07 | DOWN   | hydroxysteroid 17-beta dehydrogenase 2 [Source:HGNC Symbol;Acc:HGNC:5211]                                                | chr16 | 82035232  | 82098534  | 1455  |
| EYA1       | 0.745063136  | 1.30623E-08 | 1.8619E-07  | UP     | EYA transcriptional coactivator and phosphatase 1 [Source:HGNC Symbol;Acc:HGNC:3519]                                     | chr8  | 71197433  | 71362232  | 4504  |
| RBP5       | 0.641340108  | 1.36892E-08 | 1.94513E-07 | UP     | retinol binding protein 5 [Source:HGNC Symbol;Acc:HGNC:15847]                                                            | chr12 | 7123684   | 7128942   | 1226  |
| CCL17      | 0.593028076  | 1.50419E-08 | 2.12402E-07 | UP     | C-C motif chemokine ligand 17 [Source:HGNC Symbol;Acc:HGNC:10615]                                                        | chr16 | 57404767  | 57416062  | 620   |
| TPSD1      | 0.687553109  | 1.59145E-08 | 2.24128E-07 | UP     | tryptase delta 1 [Source:HGNC Symbol;Acc:HGNC:14118]                                                                     | chr16 | 1256059   | 1258998   | 1532  |
| HMSD       | 0.620536293  | 1.6675E-08  | 2.33643E-07 | UP     | histocompatibility minor serpin domain containing [Source:HGNC Symbol;Acc:HGNC:23037]                                    | chr18 | 63949301  | 63961834  | 2101  |
| PDZRN4     | 0.66209815   | 1.90829E-08 | 2.65332E-07 | UP     | PDZ domain containing ring finger 4 [Source:HGNC Symbol;Acc:HGNC:30552]                                                  | chr12 | 41188448  | 41574582  | 4318  |
| SV2B       | 0.644098923  | 2.42718E-08 | 3.32884E-07 | UP     | synaptic vesicle glycoprotein 2B [Source:HGNC Symbol;Acc:HGNC:16874]                                                     | chr15 | 91099500  | 91301309  | 11617 |
| FCAR       | 0.599109632  | 2.65193E-08 | 3.61916E-07 | UP     | Fc fragment of IgA receptor [Source:HGNC Symbol;Acc:HGNC:3608]                                                           | chr19 | 54874248  | 54890472  | 2288  |
| POSTN      | 0.594519404  | 3.22726E-08 | 4.34721E-07 | UP     | periostin [Source:HGNC Symbol;Acc:HGNC:16953]                                                                            | chr13 | 37562583  | 37598844  | 3379  |
| DCSTAMP    | 0.692393338  | 3.60665E-08 | 4.84028E-07 | UP     | dendrocyte expressed seven transmembrane protein [Source:HGNC Symbol;Acc:HGNC:18549]                                     | chr8  | 104339796 | 104356689 | 1983  |
| BTBD16     | -0.700255907 | 4.11909E-08 | 5.47933E-07 | DOWN   | BTB domain containing 16 [Source:HGNC Symbol;Acc:HGNC:26340]                                                             | chr10 | 122271306 | 122338162 | 1849  |
| KIR2DS4    | 0.672749284  | 6.15733E-08 | 8.00851E-07 | UP     | killer cell immunoglobulin like receptor, two Ig domains and short cytoplasmic tail 4 [Source:HGNC Symbol;Acc:HGNC:6336] | chr19 | 54832676  | 54848569  | 1608  |
| ZBED2      | 0.594593455  | 6.24776E-08 | 8.11448E-07 | UP     | zinc finger BED-type containing 2 [Source:HGNC Symbol;Acc:HGNC:20710]                                                    | chr3  | 111592900 | 111595443 | 2311  |
| DHRS9      | 0.633980465  | 6.68256E-08 | 8.62973E-07 | UP     | dehydrogenase/reductase 9 [Source:HGNC Symbol;Acc:HGNC:16888]                                                            | chr2  | 169064789 | 169096167 | 3750  |



| PARAM      | logFC        | pval        | pval.adj    | UPDOWN | desc                                                                                                   | chr   | start     | end       | size  |
|------------|--------------|-------------|-------------|--------|--------------------------------------------------------------------------------------------------------|-------|-----------|-----------|-------|
| LAMP5      | 0.609816398  | 6.94044E-08 | 8.9373E-07  | UP     | lysosomal associated membrane protein family member 5 [Source:HGNC Symbol;Acc:HGNC:16097]              | chr20 | 9514358   | 9530524   | 2042  |
| KRTAP5-9   | -0.621605289 | 7.30065E-08 | 9.36788E-07 | DOWN   | keratin associated protein 5-9 [Source:HGNC Symbol;Acc:HGNC:23604]                                     | chr11 | 71548418  | 71549553  | 1136  |
| COL6A6     | 0.753375     | 7.62256E-08 | 9.73273E-07 | UP     | collagen type VI alpha 6 chain [Source:HGNC Symbol;Acc:HGNC:27023]                                     | chr3  | 130560334 | 130678155 | 9581  |
| CHL1       | 0.657706853  | 7.94029E-08 | 1.00887E-06 | UP     | cell adhesion molecule L1 like [Source:HGNC Symbol;Acc:HGNC:1939]                                      | chr3  | 196596    | 409417    | 8023  |
| DNASE1L3   | 0.643772372  | 8.32645E-08 | 1.0513E-06  | UP     | deoxyribonuclease 1 like 3 [Source:HGNC Symbol;Acc:HGNC:2959]                                          | chr3  | 58192257  | 58214697  | 2689  |
| DES        | 0.816272388  | 8.70311E-08 | 1.09429E-06 | UP     | desmin [Source:HGNC Symbol;Acc:HGNC:2770]                                                              | chr2  | 219418377 | 219426739 | 2248  |
| CRAC1      | -0.834153442 | 1.1852E-07  | 1.46382E-06 | DOWN   | cartilage acidic protein 1 [Source:HGNC Symbol;Acc:HGNC:14882]                                         | chr10 | 97865000  | 98030828  | 3063  |
| GRIN3A     | 0.611572947  | 1.57565E-07 | 1.90074E-06 | UP     | glutamate ionotropic receptor NMDA type subunit 3A [Source:HGNC Symbol;Acc:HGNC:16767]                 | chr9  | 101569353 | 101738580 | 7770  |
| S100A8     | 0.771821401  | 1.60861E-07 | 1.93407E-06 | UP     | S100 calcium binding protein A8 [Source:HGNC Symbol;Acc:HGNC:10498]                                    | chr1  | 153390032 | 153391188 | 643   |
| RELN       | 0.654069493  | 1.79011E-07 | 2.13952E-06 | UP     | reelin [Source:HGNC Symbol;Acc:HGNC:9957]                                                              | chr7  | 103471784 | 103989516 | 11577 |
| LTF        | 0.881869657  | 2.07852E-07 | 2.45669E-06 | UP     | lactotransferrin [Source:HGNC Symbol;Acc:HGNC:6720]                                                    | chr3  | 46435645  | 46465163  | 3207  |
| TIMD4      | 0.646864503  | 2.4429E-07  | 2.85572E-06 | UP     | T-cell immunoglobulin and mucin domain containing 4 [Source:HGNC Symbol;Acc:HGNC:25132]                | chr5  | 156919282 | 156963255 | 1555  |
| MROH2A     | -0.712232584 | 2.49459E-07 | 2.90678E-06 | DOWN   | maestro heat like repeat family member 2A [Source:HGNC Symbol;Acc:HGNC:27936]                          | chr2  | 233775679 | 23383423  | 5502  |
| NCCRP1     | 0.756318301  | 2.62308E-07 | 3.05062E-06 | UP     | non-specific cytotoxic cell receptor protein 1 homolog (zebrafish) [Source:HGNC Symbol;Acc:HGNC:33739] | chr19 | 39196961  | 39201884  | 1978  |
| TPO        | 0.708555362  | 2.67186E-07 | 3.10337E-06 | UP     | thyroid peroxidase [Source:HGNC Symbol;Acc:HGNC:12015]                                                 | chr2  | 1413461   | 1542727   | 3733  |
| PTPRR      | -0.720786958 | 3.34301E-07 | 3.83562E-06 | DOWN   | protein tyrosine phosphatase, receptor type R [Source:HGNC Symbol;Acc:HGNC:9680]                       | chr12 | 70638073  | 70920843  | 4163  |
| COL9A1     | -0.701441197 | 3.81269E-07 | 4.33948E-06 | DOWN   | collagen type IX alpha 1 chain [Source:HGNC Symbol;Acc:HGNC:2217]                                      | chr6  | 70215061  | 70303083  | 5241  |
| CNTN1      | 0.586963341  | 4.07559E-07 | 4.6184E-06  | UP     | contactin 1 [Source:HGNC Symbol;Acc:HGNC:2171]                                                         | chr12 | 40692442  | 41072418  | 6915  |
| CCL7       | 0.639447147  | 4.57914E-07 | 5.14083E-06 | UP     | C-C motif chemokine ligand 7 [Source:HGNC Symbol;Acc:HGNC:10634]                                       | chr17 | 34270221  | 34272242  | 863   |
| CD70       | 0.585166493  | 4.82834E-07 | 5.40053E-06 | UP     | CD70 molecule [Source:HGNC Symbol;Acc:HGNC:11937]                                                      | chr19 | 6583183   | 6591152   | 1209  |
| CDH19      | 0.696272596  | 4.96686E-07 | 5.53498E-06 | UP     | cadherin 19 [Source:HGNC Symbol;Acc:HGNC:1758]                                                         | chr18 | 66501083  | 66604134  | 6341  |
| SPIC       | 0.664161056  | 5.532E-07   | 6.0899E-06  | UP     | Spi-C transcription factor [Source:HGNC Symbol;Acc:HGNC:29549]                                         | chr12 | 101475421 | 101486997 | 1132  |
| NRXN1      | 0.680592914  | 6.30175E-07 | 6.85405E-06 | UP     | neurexin 1 [Source:HGNC Symbol;Acc:HGNC:8008]                                                          | chr2  | 49918505  | 51032561  | 15442 |
| IGF2BP3    | 0.828643145  | 6.40512E-07 | 6.95813E-06 | UP     | insulin like growth factor 2 mRNA binding protein 3 [Source:HGNC Symbol;Acc:HGNC:28868]                | chr7  | 23310209  | 23470467  | 4250  |
| COMP       | 0.716627755  | 7.14721E-07 | 7.70428E-06 | UP     | cartilage oligomeric matrix protein [Source:HGNC Symbol;Acc:HGNC:2227]                                 | chr19 | 18782773  | 18791314  | 2716  |
| HAS1       | 0.643567946  | 8.12778E-07 | 8.64817E-06 | UP     | hyaluronan synthase 1 [Source:HGNC Symbol;Acc:HGNC:4818]                                               | chr19 | 51713112  | 51723994  | 2215  |
| PKHD1L1    | 0.637254982  | 8.40938E-07 | 8.92684E-06 | UP     | PKHD1 like 1 [Source:HGNC Symbol;Acc:HGNC:20313]                                                       | chr8  | 109362477 | 109530330 | 13076 |
| SCRG1      | 0.646156755  | 8.98184E-07 | 9.47351E-06 | UP     | stimulator of chondrogenesis 1 [Source:HGNC Symbol;Acc:HGNC:17036]                                     | chr4  | 173384701 | 173399536 | 4420  |
| ZYG11A     | 0.644783415  | 9.16611E-07 | 9.64543E-06 | UP     | zyg-11 family member A, cell cycle regulator [Source:HGNC Symbol;Acc:HGNC:32058]                       | chr1  | 52842511  | 52894998  | 4694  |
| AOX1       | 0.59244425   | 1.02772E-06 | 1.07151E-05 | UP     | aldehyde oxidase 1 [Source:HGNC Symbol;Acc:HGNC:553]                                                   | chr2  | 200585868 | 200671495 | 5074  |
| CNTNAP4    | 0.743984909  | 1.0559E-06  | 1.09774E-05 | UP     | contactin associated protein like 4 [Source:HGNC Symbol;Acc:HGNC:18747]                                | chr16 | 76277278  | 76559238  | 5114  |
| FOSB       | 0.586979439  | 1.13718E-06 | 1.17415E-05 | UP     | FosB proto-oncogene, AP-1 transcription factor subunit [Source:HGNC Symbol;Acc:HGNC:3797]              | chr19 | 45467995  | 45475179  | 5553  |
| MYH6       | 0.605389448  | 1.16525E-06 | 1.20104E-05 | UP     | myosin heavy chain 6 [Source:HGNC Symbol;Acc:HGNC:7576]                                                | chr14 | 23381990  | 23408277  | 5941  |
| CDH8       | -0.597426173 | 1.35983E-06 | 1.37836E-05 | DOWN   | cadherin 8 [Source:HGNC Symbol;Acc:HGNC:1767]                                                          | chr16 | 61647242  | 62036835  | 11649 |
| GBP6       | 0.740063669  | 1.60066E-06 | 1.59547E-05 | UP     | guanylate binding protein family member 6 [Source:HGNC Symbol;Acc:HGNC:25395]                          | chr1  | 89364058  | 89386461  | 2987  |
| AC245369.4 | 0.807051489  | 1.63711E-06 | 1.62671E-05 | UP     | Immunoglobulin heavy variable 1-69-2 [Source:UniProtKB/Swiss-Prot;Acc:A0A0G2JMI3]                      | chr14 | 106737110 | 106737547 | 353   |
| IL31RA     | 0.682615755  | 1.65484E-06 | 1.64314E-05 | UP     | interleukin 31 receptor A [Source:HGNC Symbol;Acc:HGNC:18969]                                          | chr5  | 55851379  | 55922853  | 4576  |
| OGN        | 0.66372662   | 1.81122E-06 | 1.79058E-05 | UP     | osteoglycin [Source:HGNC Symbol;Acc:HGNC:8126]                                                         | chr9  | 92383967  | 92404613  | 3025  |
| SHH        | -0.730284848 | 1.93415E-06 | 1.90381E-05 | DOWN   | sonic hedgehog [Source:HGNC Symbol;Acc:HGNC:10848]                                                     | chr7  | 155799986 | 155812273 | 4454  |
| ANGPTL7    | 0.606529834  | 1.93618E-06 | 1.90476E-05 | UP     | angiotensinogen like 7 [Source:HGNC Symbol;Acc:HGNC:24078]                                             | chr1  | 11189341  | 11195981  | 2238  |
| CYP3A5     | -0.638348155 | 2.55625E-06 | 2.45744E-05 | DOWN   | cytochrome P450 family 3 subfamily A member 5 [Source:HGNC Symbol;Acc:HGNC:2638]                       | chr7  | 99648194  | 99679998  | 3983  |
| IGLV1-41   | 0.668954675  | 2.73116E-06 | 2.60625E-05 | UP     | immunoglobulin lambda variable 1-41 (pseudogene) [Source:HGNC Symbol;Acc:HGNC:5878]                    | chr22 | 22404207  | 22404721  | 406   |
| MMP3       | 0.664339808  | 2.96617E-06 | 2.81551E-05 | UP     | matrix metalloproteinase 3 [Source:HGNC Symbol;Acc:HGNC:7173]                                          | chr11 | 102835801 | 102843803 | 2016  |
| VIT        | 0.634499143  | 3.13229E-06 | 2.9579E-05  | UP     | vitrin [Source:HGNC Symbol;Acc:HGNC:12697]                                                             | chr2  | 36696690  | 36814792  | 3444  |
| TCEAL2     | 0.60340677   | 3.37559E-06 | 3.16949E-05 | UP     | transcription elongation factor A like 2 [Source:HGNC Symbol;Acc:HGNC:29818]                           | chrX  | 102125688 | 102127711 | 1100  |
| ANXA10     | -0.875444682 | 3.39915E-06 | 3.18996E-05 | DOWN   | annexin A10 [Source:HGNC Symbol;Acc:HGNC:534]                                                          | chr4  | 168092515 | 168187690 | 1417  |
| GTSF1      | 0.659477771  | 4.40569E-06 | 4.03636E-05 | UP     | gametocyte specific factor 1 [Source:HGNC Symbol;Acc:HGNC:26565]                                       | chr12 | 54455954  | 54473599  | 1675  |
| XPNPEP2    | 0.605014059  | 4.45971E-06 | 4.07555E-05 | UP     | X-prolyl aminopeptidase 2 [Source:HGNC Symbol;Acc:HGNC:12823]                                          | chrX  | 129738974 | 129769538 | 3500  |
| MYBPC1     | -0.849062816 | 5.29228E-06 | 4.75964E-05 | DOWN   | myosin binding protein C, slow type [Source:HGNC Symbol;Acc:HGNC:7549]                                 | chr12 | 101594849 | 101686018 | 4344  |
| COL10A1    | 0.705125391  | 8.65659E-06 | 7.38948E-05 | UP     | collagen type X alpha 1 chain [Source:HGNC Symbol;Acc:HGNC:2185]                                       | chr6  | 116118923 | 116126133 | 3682  |
| MARCO      | 0.644576567  | 1.05092E-05 | 8.8378E-05  | UP     | macrophage receptor with collagenous structure [Source:HGNC Symbol;Acc:HGNC:6895]                      | chr2  | 118942166 | 118994660 | 1838  |
| AC011487.2 | 0.735533937  | 1.51192E-05 | 0.000122377 | UP     |                                                                                                        | chr19 | 53599628  | 53608451  | 2047  |
| GLB1L3     | 0.665208381  | 1.58619E-05 | 0.000128046 | UP     | galactosidase beta 1 like 3 [Source:HGNC Symbol;Acc:HGNC:25147]                                        | chr11 | 134274245 | 134319563 | 5273  |
| ADIPOQ     | 0.714186348  | 2.08841E-05 | 0.000163141 | UP     | adiponectin, C1Q and collagen domain containing [Source:HGNC Symbol;Acc:HGNC:13633]                    | chr3  | 186842690 | 186858463 | 4613  |
| PIP        | 0.639872387  | 2.4812E-05  | 0.000190158 | UP     | prolactin induced protein [Source:HGNC Symbol;Acc:HGNC:8993]                                           | chr7  | 143132077 | 143139746 | 585   |
| ADH1B      | 0.694658737  | 2.57072E-05 | 0.000196251 | UP     | alcohol dehydrogenase 1B (class I), beta polypeptide [Source:HGNC Symbol;Acc:HGNC:250]                 | chr4  | 99304964  | 99352760  | 4299  |

| PARAM    | logFC        | pval        | pval.adj    | UPDOWN | desc                                                                                                       | chr   | start     | end       | size  |
|----------|--------------|-------------|-------------|--------|------------------------------------------------------------------------------------------------------------|-------|-----------|-----------|-------|
| C10orf99 | -0.669366913 | 2.62056E-05 | 0.000199385 | DOWN   | chromosome 10 open reading frame 99 [Source:HGNC Symbol;Acc:HGNC:31428]                                    | chr10 | 84173738  | 84185294  | 888   |
| LRRC15   | 0.629774098  | 2.63578E-05 | 0.000200374 | UP     | leucine rich repeat containing 15 [Source:HGNC Symbol;Acc:HGNC:20818]                                      | chr3  | 194355247 | 194369743 | 5940  |
| CLCA4    | -0.674361426 | 4.17393E-05 | 0.000299357 | DOWN   | chloride channel accessory 4 [Source:HGNC Symbol;Acc:HGNC:2018]                                            | chr1  | 86547078  | 86580754  | 3211  |
| C9orf84  | 0.603315394  | 4.37275E-05 | 0.000311522 | UP     | chromosome 9 open reading frame 84 [Source:HGNC Symbol;Acc:HGNC:26535]                                     | chr9  | 111686173 | 111795008 | 6276  |
| PTPRZ1   | 0.736007782  | 5.40735E-05 | 0.000375635 | UP     | protein tyrosine phosphatase, receptor type Z1 [Source:HGNC Symbol;Acc:HGNC:9685]                          | chr7  | 121873089 | 122062036 | 8175  |
| HTR3A    | 0.691277539  | 6.34882E-05 | 0.000433725 | UP     | 5-hydroxytryptamine receptor 3A [Source:HGNC Symbol;Acc:HGNC:5297]                                         | chr11 | 113974881 | 113990313 | 2605  |
| DDC      | -0.949925671 | 7.08578E-05 | 0.00047706  | DOWN   | dopa decarboxylase [Source:HGNC Symbol;Acc:HGNC:2719]                                                      | chr7  | 50458436  | 50565457  | 2493  |
| SOX2     | 0.72592812   | 7.97221E-05 | 0.000529078 | UP     | SRY-box 2 [Source:HGNC Symbol;Acc:HGNC:11195]                                                              | chr3  | 181711924 | 181714436 | 2513  |
| MUC16    | 0.858536312  | 0.000106127 | 0.000679925 | UP     | mucin 16, cell surface associated [Source:HGNC Symbol;Acc:HGNC:15582]                                      | chr19 | 8848844   | 8981342   | 43816 |
| CA9      | -0.722349125 | 0.000118984 | 0.000755358 | DOWN   | carbonic anhydrase 9 [Source:HGNC Symbol;Acc:HGNC:1383]                                                    | chr9  | 35673856  | 35681159  | 1618  |
| WT1-AS   | 0.637756501  | 0.000119166 | 0.000756248 | UP     | WT1 antisense RNA [Source:HGNC Symbol;Acc:HGNC:18135]                                                      | chr11 | 32435518  | 32458769  | 5225  |
| PRSS21   | 0.619929529  | 0.000122316 | 0.000772454 | UP     | protease, serine 21 [Source:HGNC Symbol;Acc:HGNC:9485]                                                     | chr16 | 2817180   | 2821719   | 1148  |
| SNTG1    | -0.585540526 | 0.000122441 | 0.000772971 | DOWN   | syntrophin gamma 1 [Source:HGNC Symbol;Acc:HGNC:13740]                                                     | chr8  | 49909789  | 50794118  | 3773  |
| KRT16    | 0.732865551  | 0.000224883 | 0.001308105 | UP     | keratin 16 [Source:HGNC Symbol;Acc:HGNC:6423]                                                              | chr17 | 41609778  | 41612753  | 1644  |
| CXCL17   | 0.58838552   | 0.000236014 | 0.001363228 | UP     | C-X-C motif chemokine ligand 17 [Source:HGNC Symbol;Acc:HGNC:19232]                                        | chr19 | 42428288  | 42443048  | 1172  |
| IHH      | -0.591712693 | 0.000263612 | 0.001500644 | DOWN   | indian hedgehog [Source:HGNC Symbol;Acc:HGNC:5956]                                                         | chr2  | 219054420 | 219060467 | 2023  |
| BPIFB1   | 0.782832285  | 0.000367063 | 0.00199513  | UP     | BPI fold containing family B member 1 [Source:HGNC Symbol;Acc:HGNC:16108]                                  | chr20 | 33283135  | 33309878  | 1727  |
| EIF1AY   | 0.738518862  | 0.000466712 | 0.002450608 | UP     | eukaryotic translation initiation factor 1A, Y-linked [Source:HGNC Symbol;Acc:HGNC:3252]                   | chrY  | 20575725  | 20593154  | 1390  |
| FOXE1    | 0.715733248  | 0.000485257 | 0.002534773 | UP     | forkhead box E1 [Source:HGNC Symbol;Acc:HGNC:3806]                                                         | chr9  | 97853254  | 97856715  | 3462  |
| KRT4     | 0.644050881  | 0.000488144 | 0.002546917 | UP     | keratin 4 [Source:HGNC Symbol;Acc:HGNC:6441]                                                               | chr12 | 52806549  | 52814551  | 2576  |
| A2ML1    | 0.602123202  | 0.000650163 | 0.003240272 | UP     | alpha-2-macroglobulin like 1 [Source:HGNC Symbol;Acc:HGNC:23336]                                           | chr12 | 8822472   | 8876785   | 5445  |
| KDM5D    | 0.84156752   | 0.000656535 | 0.003268432 | UP     | lysine demethylase 5D [Source:HGNC Symbol;Acc:HGNC:11115]                                                  | chrY  | 19705415  | 19744939  | 5581  |
| GABRP    | 0.652328077  | 0.000952121 | 0.004487369 | UP     | gamma-aminobutyric acid type A receptor pi subunit [Source:HGNC Symbol;Acc:HGNC:4089]                      | chr5  | 170782682 | 170814047 | 3670  |
| ZFY      | 0.707011568  | 0.001067128 | 0.004934854 | UP     | zinc finger protein, Y-linked [Source:HGNC Symbol;Acc:HGNC:12870]                                          | chrY  | 2935281   | 2982506   | 5406  |
| EPS8L3   | -0.620190186 | 0.001122355 | 0.005147842 | DOWN   | EPS8 like 3 [Source:HGNC Symbol;Acc:HGNC:21297]                                                            | chr1  | 109750080 | 109764027 | 2326  |
| USP9Y    | 0.793426892  | 0.001135434 | 0.005199937 | UP     | ubiquitin specific peptidase 9, Y-linked [Source:HGNC Symbol;Acc:HGNC:12633]                               | chrY  | 12701231  | 12860839  | 10036 |
| TXLNGY   | 0.698834561  | 0.001205191 | 0.005471037 | UP     | taxilin gamma pseudogene, Y-linked [Source:HGNC Symbol;Acc:HGNC:18473]                                     | chrY  | 19567313  | 19606274  | 8661  |
| DDX3Y    | 0.735201814  | 0.001747365 | 0.007477336 | UP     | DEAD-box helicase 3, Y-linked [Source:HGNC Symbol;Acc:HGNC:2699]                                           | chrY  | 12904108  | 12920478  | 4752  |
| PRKY     | 0.651258484  | 0.001795556 | 0.007647712 | UP     | protein kinase, Y-linked, pseudogene [Source:HGNC Symbol;Acc:HGNC:9444]                                    | chrY  | 7273972   | 7381548   | 7218  |
| VIL1     | -0.762557896 | 0.002104685 | 0.008716319 | DOWN   | villin 1 [Source:HGNC Symbol;Acc:HGNC:12690]                                                               | chr2  | 218419092 | 218453295 | 6872  |
| RPS4Y1   | 0.738503192  | 0.002439786 | 0.009825801 | UP     | ribosomal protein S4, Y-linked 1 [Source:HGNC Symbol;Acc:HGNC:10425]                                       | chrY  | 2841486   | 2867268   | 1305  |
| UTY      | 0.735942407  | 0.002484883 | 0.009976397 | UP     | ubiquitously transcribed tetratricopeptide repeat containing, Y-linked [Source:HGNC Symbol;Acc:HGNC:12638] | chrY  | 13248379  | 13480673  | 8085  |
| NLGN4Y   | 0.613401233  | 0.002699235 | 0.010678559 | UP     | neuroligin 4, Y-linked [Source:HGNC Symbol;Acc:HGNC:15529]                                                 | chrY  | 14523746  | 14843726  | 5338  |
| BNC1     | 0.611183148  | 0.003571329 | 0.013453513 | UP     | basonuclin 1 [Source:HGNC Symbol;Acc:HGNC:1081]                                                            | chr15 | 83255903  | 83284714  | 4795  |
| KRT5     | 0.675780874  | 0.00357999  | 0.013477742 | UP     | keratin 5 [Source:HGNC Symbol;Acc:HGNC:6442]                                                               | chr12 | 52514575  | 52520687  | 2531  |
| S100A7   | 0.613589806  | 0.005037043 | 0.017875638 | UP     | S100 calcium binding protein A7 [Source:HGNC Symbol;Acc:HGNC:10497]                                        | chr1  | 153457744 | 153460701 | 536   |
| MUC12    | -0.68145551  | 0.005779437 | 0.02003575  | DOWN   | mucin 12, cell surface associated [Source:HGNC Symbol;Acc:HGNC:7510]                                       | chr7  | 100969623 | 101018949 | 16750 |
| BPIFA1   | 0.617466357  | 0.009795551 | 0.03081248  | UP     | BPI fold containing family A member 1 [Source:HGNC Symbol;Acc:HGNC:15749]                                  | chr20 | 33235995  | 33243311  | 1081  |
| KRT6A    | 0.687715338  | 0.01068539  | 0.033006822 | UP     | keratin 6A [Source:HGNC Symbol;Acc:HGNC:6443]                                                              | chr12 | 52487174  | 52493257  | 2310  |
| XIST     | -0.703037643 | 0.016729724 | 0.047700366 | DOWN   | X inactive specific transcript (non-protein coding) [Source:HGNC Symbol;Acc:HGNC:12810]                    | chrX  | 73820651  | 73852753  | 19310 |

**Table S3** List of differentially expressed genes.

Tab 4: Contrasts

| Coefficient      | INFLAMED_DESERT | INFLAMED_EXCLUDED | EXCLUDED_DESERT |
|------------------|-----------------|-------------------|-----------------|
| DESERT           | -1              | 0                 | -1              |
| EXCLUDED         | 0               | -1                | 1               |
| INFLAMED         | 1               | 1                 | 0               |
| TISSUEkidney     | 0               | 0                 | 0               |
| TISSUEliver      | 0               | 0                 | 0               |
| TISSUElung       | 0               | 0                 | 0               |
| TISSUElymph_node | 0               | 0                 | 0               |
| TISSUEOTHER_UNK  | 0               | 0                 | 0               |
| TISSUEurothelial | 0               | 0                 | 0               |

**Table S4** List of differentially expressed signatures.

Tab 1: INFLAMED\_DESERT

| PARAM            | NGenes | Direction | PValue      | FDR         | CONTR           |
|------------------|--------|-----------|-------------|-------------|-----------------|
| ExhCD8Tcell      | 26     | Up        | 1.40851E-47 | 1.33808E-45 | INFLAMED_DESERT |
| Tcell            | 7      | Up        | 2.3476E-23  | 1.11511E-21 | INFLAMED_DESERT |
| Cytotoxicity     | 13     | Up        | 2.69763E-20 | 8.5425E-19  | INFLAMED_DESERT |
| NKTcell          | 6      | Up        | 2.71241E-18 | 6.44198E-17 | INFLAMED_DESERT |
| Macrophage_CXCL9 | 4      | Up        | 2.07619E-17 | 3.94477E-16 | INFLAMED_DESERT |
| Hematopoietic    | 7      | Up        | 1.68623E-16 | 2.66987E-15 | INFLAMED_DESERT |
| Macrophage_MSR1  | 15     | Up        | 7.57583E-12 | 1.02815E-10 | INFLAMED_DESERT |
| Macrophage       | 12     | Up        | 2.42055E-11 | 2.8744E-10  | INFLAMED_DESERT |
| EMTcell          | 8      | Up        | 7.01001E-11 | 7.39945E-10 | INFLAMED_DESERT |
| MemBcell         | 6      | Up        | 9.34889E-11 | 8.88144E-10 | INFLAMED_DESERT |
| CD8Tcell         | 2      | Up        | 3.14546E-10 | 2.71653E-09 | INFLAMED_DESERT |
| NKcell           | 5      | Up        | 3.94623E-10 | 3.1241E-09  | INFLAMED_DESERT |
| Myeloid          | 14     | Up        | 2.75444E-09 | 2.01286E-08 | INFLAMED_DESERT |
| IgGPlasma        | 5      | Up        | 7.25905E-09 | 4.92578E-08 | INFLAMED_DESERT |
| gdTcell          | 4      | Up        | 9.7277E-09  | 6.16087E-08 | INFLAMED_DESERT |
| Tcell_IL7Rmax    | 13     | Up        | 3.37459E-08 | 2.00366E-07 | INFLAMED_DESERT |
| InnateLymphoid   | 14     | Up        | 5.34129E-08 | 2.98484E-07 | INFLAMED_DESERT |
| NaiBcell         | 6      | Up        | 6.60259E-08 | 3.4847E-07  | INFLAMED_DESERT |
| Blymphocyte      | 8      | Up        | 1.0147E-07  | 5.07348E-07 | INFLAMED_DESERT |
| IgMPlasma        | 3      | Up        | 3.65104E-07 | 1.73424E-06 | INFLAMED_DESERT |
| CD56brightNK     | 6      | Up        | 5.92841E-07 | 2.6819E-06  | INFLAMED_DESERT |
| cDC              | 13     | Up        | 1.05594E-06 | 4.55973E-06 | INFLAMED_DESERT |
| CD56dimNK        | 5      | Up        | 8.98959E-06 | 3.71309E-05 | INFLAMED_DESERT |
| IgAPlasma        | 3      | Up        | 4.84512E-05 | 0.000191786 | INFLAMED_DESERT |
| Plasma           | 6      | Up        | 0.000106761 | 0.00040569  | INFLAMED_DESERT |
| NaiTcell         | 7      | Up        | 0.00054124  | 0.001977608 | INFLAMED_DESERT |
| InflamMonocyte   | 4      | Up        | 0.000878528 | 0.00301947  | INFLAMED_DESERT |
| CD4Tcell         | 3      | Up        | 0.000889949 | 0.00301947  | INFLAMED_DESERT |
| Bcell            | 4      | Up        | 0.000940117 | 0.003079694 | INFLAMED_DESERT |
| ProBcell         | 4      | Up        | 0.001077199 | 0.003411129 | INFLAMED_DESERT |
| cDC1             | 4      | Up        | 0.002673842 | 0.008194031 | INFLAMED_DESERT |
| cDC_CCR7         | 7      | Up        | 0.003293193 | 0.009776667 | INFLAMED_DESERT |
| ImmaturecDC      | 5      | Up        | 0.005808242 | 0.016720698 | INFLAMED_DESERT |
| Epithelial       | 11     | Down      | 0.007623586 | 0.021301195 | INFLAMED_DESERT |
| ILC2             | 6      | Up        | 0.008992384 | 0.02410855  | INFLAMED_DESERT |
| RegTcell         | 5      | Up        | 0.009135872 | 0.02410855  | INFLAMED_DESERT |
| Cholangiocyte    | 11     | Down      | 0.010876369 | 0.027925813 | INFLAMED_DESERT |
| Paneth           | 1      | Up        | 0.011494634 | 0.028736585 | INFLAMED_DESERT |
| Macrophage_MARCO | 8      | Up        | 0.018722014 | 0.045604906 | INFLAMED_DESERT |

**Table S4** List of differentially expressed signatures.

Tab 2: INFLAMED\_EXCLUDED

| PARAM               | NGenes | Direction | PValue      | FDR         | CONTR             |
|---------------------|--------|-----------|-------------|-------------|-------------------|
| ExhCD8Tcell         | 26     | Up        | 2.24545E-37 | 2.13318E-35 | INFLAMED_EXCLUDED |
| Macrophage_CXCL9    | 4      | Up        | 1.82713E-18 | 8.67888E-17 | INFLAMED_EXCLUDED |
| Cytotoxicity        | 13     | Up        | 1.26789E-13 | 4.01498E-12 | INFLAMED_EXCLUDED |
| Tcell               | 7      | Up        | 6.34058E-11 | 1.4759E-09  | INFLAMED_EXCLUDED |
| NKTcell             | 6      | Up        | 7.76789E-11 | 1.4759E-09  | INFLAMED_EXCLUDED |
| Macrophage          | 12     | Up        | 3.42946E-08 | 5.42998E-07 | INFLAMED_EXCLUDED |
| Hematopoietic       | 7      | Up        | 4.12444E-08 | 5.59746E-07 | INFLAMED_EXCLUDED |
| CD8Tcell            | 2      | Up        | 1.87974E-07 | 2.23219E-06 | INFLAMED_EXCLUDED |
| Macrophage_MSR1     | 15     | Up        | 2.12785E-07 | 2.24606E-06 | INFLAMED_EXCLUDED |
| NKcell              | 5      | Up        | 4.39152E-06 | 4.17194E-05 | INFLAMED_EXCLUDED |
| Myeloid             | 14     | Up        | 5.22906E-05 | 0.000451601 | INFLAMED_EXCLUDED |
| CD56dimNK           | 5      | Up        | 7.33427E-05 | 0.00058063  | INFLAMED_EXCLUDED |
| Fibroblast          | 8      | Down      | 8.44643E-05 | 0.000617239 | INFLAMED_EXCLUDED |
| EMTcell             | 8      | Up        | 0.000315391 | 0.002027863 | INFLAMED_EXCLUDED |
| gdTcell             | 4      | Up        | 0.000320189 | 0.002027863 | INFLAMED_EXCLUDED |
| Cholangiocyte       | 11     | Down      | 0.000413785 | 0.002456847 | INFLAMED_EXCLUDED |
| Epithelial          | 11     | Down      | 0.000504657 | 0.002820142 | INFLAMED_EXCLUDED |
| PancreaticEndocrine | 11     | Down      | 0.000768038 | 0.004053532 | INFLAMED_EXCLUDED |
| InflamMonocyte      | 4      | Up        | 0.000998269 | 0.004991347 | INFLAMED_EXCLUDED |
| PancStellate        | 7      | Down      | 0.003275579 | 0.015559    | INFLAMED_EXCLUDED |
| Myofibroblast       | 3      | Down      | 0.003796121 | 0.017172927 | INFLAMED_EXCLUDED |
| Endothelial         | 12     | Down      | 0.004045038 | 0.017467211 | INFLAMED_EXCLUDED |
| Mesothelial         | 6      | Down      | 0.004961151 | 0.020491711 | INFLAMED_EXCLUDED |
| InnateLymphoid      | 14     | Up        | 0.006600569 | 0.026127254 | INFLAMED_EXCLUDED |
| CD56brightNK        | 6      | Up        | 0.007431402 | 0.027984096 | INFLAMED_EXCLUDED |
| Mast                | 5      | Down      | 0.007658805 | 0.027984096 | INFLAMED_EXCLUDED |
| ColorectalCancer    | 5      | Down      | 0.008184439 | 0.0287971   | INFLAMED_EXCLUDED |
| EnterocytePC        | 4      | Down      | 0.009200361 | 0.031215511 | INFLAMED_EXCLUDED |
| Paneth              | 1      | Up        | 0.010410645 | 0.034103836 | INFLAMED_EXCLUDED |



**Table S4** List of differentially expressed signatures.

Tab 3: EXCLUDED\_DESERT

| PARAM             | NGenes | Direction | PValue      | FDR         | CONTR           |
|-------------------|--------|-----------|-------------|-------------|-----------------|
| ExhCD8Tcell       | 26     | Up        | 2.04028E-33 | 1.93827E-31 | EXCLUDED_DESERT |
| Tcell             | 7      | Up        | 3.72806E-27 | 1.77083E-25 | EXCLUDED_DESERT |
| Blymphocyte       | 8      | Up        | 4.41292E-18 | 1.39742E-16 | EXCLUDED_DESERT |
| MemBcell          | 6      | Up        | 8.90429E-18 | 2.11477E-16 | EXCLUDED_DESERT |
| NKTcell           | 6      | Up        | 2.71675E-17 | 5.16182E-16 | EXCLUDED_DESERT |
| Cytotoxicity      | 13     | Up        | 4.02167E-17 | 5.46986E-16 | EXCLUDED_DESERT |
| IgGPlasma         | 5      | Up        | 4.03042E-17 | 5.46986E-16 | EXCLUDED_DESERT |
| Hematopoietic     | 7      | Up        | 5.88473E-17 | 6.98811E-16 | EXCLUDED_DESERT |
| EMTcell           | 8      | Up        | 1.61625E-14 | 1.70604E-13 | EXCLUDED_DESERT |
| Tcell_IL7Rmax     | 13     | Up        | 1.7412E-13  | 1.65414E-12 | EXCLUDED_DESERT |
| NaiBcell          | 6      | Up        | 3.94886E-13 | 3.41038E-12 | EXCLUDED_DESERT |
| IgMPlasma         | 3      | Up        | 1.3198E-11  | 1.04484E-10 | EXCLUDED_DESERT |
| cDC               | 13     | Up        | 1.75275E-11 | 1.28086E-10 | EXCLUDED_DESERT |
| InnateLymphoid    | 14     | Up        | 2.26934E-11 | 1.53991E-10 | EXCLUDED_DESERT |
| IgAPlasma         | 3      | Up        | 4.53101E-11 | 2.86964E-10 | EXCLUDED_DESERT |
| Macrophage_CXCL9  | 4      | Up        | 3.17211E-10 | 1.88344E-09 | EXCLUDED_DESERT |
| Plasma            | 6      | Up        | 4.1916E-10  | 2.34237E-09 | EXCLUDED_DESERT |
| Macrophage_MSR1   | 15     | Up        | 8.6411E-10  | 4.34213E-09 | EXCLUDED_DESERT |
| gdTcell           | 4      | Up        | 8.68426E-10 | 4.34213E-09 | EXCLUDED_DESERT |
| NKcell            | 5      | Up        | 1.2138E-09  | 5.76557E-09 | EXCLUDED_DESERT |
| Myeloid           | 14     | Up        | 4.50919E-09 | 2.03987E-08 | EXCLUDED_DESERT |
| CD8Tcell          | 2      | Up        | 4.93322E-09 | 2.08345E-08 | EXCLUDED_DESERT |
| Macrophage        | 12     | Up        | 5.04414E-09 | 2.08345E-08 | EXCLUDED_DESERT |
| Bcell             | 4      | Up        | 8.87199E-09 | 3.51183E-08 | EXCLUDED_DESERT |
| CD56brightNK      | 6      | Up        | 1.09617E-08 | 4.16544E-08 | EXCLUDED_DESERT |
| cDC_CCR7          | 7      | Up        | 7.04328E-07 | 2.57351E-06 | EXCLUDED_DESERT |
| ILC2              | 6      | Up        | 4.12833E-06 | 1.45256E-05 | EXCLUDED_DESERT |
| CD4Tcell          | 3      | Up        | 1.08916E-05 | 3.69535E-05 | EXCLUDED_DESERT |
| NaiTcell          | 7      | Up        | 1.78847E-05 | 5.85877E-05 | EXCLUDED_DESERT |
| cDC2              | 4      | Up        | 2.51889E-05 | 7.9765E-05  | EXCLUDED_DESERT |
| ProBcell          | 4      | Up        | 4.0991E-05  | 0.000125618 | EXCLUDED_DESERT |
| RegTcell          | 5      | Up        | 0.000118403 | 0.000351509 | EXCLUDED_DESERT |
| ExhBcell          | 8      | Up        | 0.000224795 | 0.000647137 | EXCLUDED_DESERT |
| Granulocyte       | 4      | Up        | 0.00025158  | 0.000702943 | EXCLUDED_DESERT |
| CD56dimNK         | 5      | Up        | 0.000356358 | 0.000967257 | EXCLUDED_DESERT |
| cDC1              | 4      | Up        | 0.000403261 | 0.001064161 | EXCLUDED_DESERT |
| FollicularBcell   | 2      | Up        | 0.000482008 | 0.001237587 | EXCLUDED_DESERT |
| Fibroblast        | 8      | Up        | 0.000750436 | 0.001876089 | EXCLUDED_DESERT |
| Monocyte          | 10     | Up        | 0.001395801 | 0.003400028 | EXCLUDED_DESERT |
| McellGut          | 5      | Up        | 0.002796079 | 0.006640688 | EXCLUDED_DESERT |
| EntericGlial      | 7      | Up        | 0.003130885 | 0.007155378 | EXCLUDED_DESERT |
| Mast              | 5      | Up        | 0.00316343  | 0.007155378 | EXCLUDED_DESERT |
| Basophil          | 4      | Up        | 0.003547393 | 0.007681311 | EXCLUDED_DESERT |
| Endothelial       | 12     | Up        | 0.00355766  | 0.007681311 | EXCLUDED_DESERT |
| ImmaturecDC       | 5      | Up        | 0.003761675 | 0.007941313 | EXCLUDED_DESERT |
| Glial             | 11     | Up        | 0.007695904 | 0.015893715 | EXCLUDED_DESERT |
| InflamFibroblast  | 4      | Up        | 0.011348483 | 0.022938422 | EXCLUDED_DESERT |
| ILC3              | 4      | Up        | 0.012479541 | 0.024699092 | EXCLUDED_DESERT |
| HEVEndothelial    | 3      | Up        | 0.015623772 | 0.030290986 | EXCLUDED_DESERT |
| Chondrocyte       | 8      | Up        | 0.016318267 | 0.031004708 | EXCLUDED_DESERT |
| CommonLymphoidPC  | 2      | Up        | 0.01748391  | 0.032568068 | EXCLUDED_DESERT |
| Neutrophil        | 2      | Up        | 0.018099191 | 0.033065829 | EXCLUDED_DESERT |
| VesselEndothelial | 6      | Up        | 0.018886438 | 0.033853049 | EXCLUDED_DESERT |
| ClassMonocyte     | 3      | Up        | 0.024194642 | 0.042564647 | EXCLUDED_DESERT |

**Table S4** List of differentially expressed signatures.*Tab 4: Contrasts*

| Coefficient      | INFLAMED_DESERT | INFLAMED_EXCLUDED | EXCLUDED_DESERT |
|------------------|-----------------|-------------------|-----------------|
| DESERT           | -1              | 0                 | -1              |
| EXCLUDED         | 0               | -1                | 1               |
| INFLAMED         | 1               | 1                 | 0               |
| TISSUEkidney     | 0               | 0                 | 0               |
| TISSUEliver      | 0               | 0                 | 0               |
| TISSUElung       | 0               | 0                 | 0               |
| TISSUElymph_node | 0               | 0                 | 0               |
| TISSUEOTHER_UNK  | 0               | 0                 | 0               |
| TISSUEurothelial | 0               | 0                 | 0               |

**Table S5** Patient baseline characteristics.

| Characteristic              |                                    | Patient population (N=628) |
|-----------------------------|------------------------------------|----------------------------|
| Age                         | Median (range)                     | 60 (18–86)                 |
| Sex, n (%)                  | Female                             | 281                        |
|                             | Male                               | 347                        |
| Tumor sample origin*, n (%) | NSCLC (Non-small cell lung cancer) | 89                         |
|                             | CRC (Colorectal carcinoma)         | 84                         |
|                             | HNC (Head and neck carcinoma)      | 60                         |
|                             | RCC (Renal cell carcinoma)         | 53                         |
|                             | UBC (Urinary bladder carcinoma)    | 51                         |
|                             | OVC (Ovarian carcinoma)            | 37                         |
|                             | BC (Breast carcinoma)              | 33                         |
|                             | PAC (Pancreatic adenocarcinoma)    | 32                         |
|                             | MEL (Melanoma)                     | 28                         |
|                             | EC (Esophageal carcinoma)          | 28                         |
|                             | SAR (Sarcoma)                      | 17                         |
|                             | GC (Gastric carcinoma)             | 14                         |
|                             | CERC (Cervical carcinoma)          | 14                         |
|                             | NET (Neuroendocrine tumor)         | 9                          |
|                             | AdrenC (Adrenocortical carcinoma)  | 5                          |
|                             | Meso (Mesothelioma)                | 4                          |
|                             | CholC (Cholangiocarcinoma)         | 3                          |
|                             | IMEL (Intraocular Melanoma)        | 3                          |
|                             | PRCA (Prostate cancer)             | 3                          |
|                             | SIC (Small intestine carcinoma)    | 3                          |
| AnC (Anal carcinoma)        | 2                                  |                            |
| SkinC (Skin carcinoma)      | 2                                  |                            |

|                                                |                                                                                    |            |
|------------------------------------------------|------------------------------------------------------------------------------------|------------|
|                                                | ENDC (Endometrial carcinoma)                                                       | 1          |
|                                                | Thymo (Thymoma)                                                                    | 1          |
|                                                | ThyrC (Thyroid carcinoma)                                                          | 1          |
| <b>CD8 immune phenotype<sup>†</sup>, n (%)</b> | Inflamed                                                                           | 193 (30.7) |
|                                                | Desert                                                                             | 144 (22.9) |
|                                                | Excluded                                                                           | 291 (46.3) |
| <b>Any previous therapy, n (%)</b>             | Experienced                                                                        | 126 (20.1) |
|                                                | Naïve                                                                              | 493 (78.5) |
|                                                | Missing                                                                            | 9 (1.4)    |
| <b>Previous ICIs<sup>‡</sup>, n (%)</b>        | Lapcin + nivolumab                                                                 | 59 (9.3)   |
|                                                | Pembrolizumab                                                                      | 29 (4.6)   |
|                                                | Atezolizumab                                                                       | 16 (25.5)  |
|                                                | Other minor ones (avelumab, durvalumab, cemiplimab, ipilimumab)                    | 14 (2.2)   |
|                                                | Combinations (ipilimumab-nivolumab, durvalumab, avelumab, ipilimumab-atezolizumab) | 8 (1.3)    |

\*Tumor types with n < 5 samples (25 different categories: eg, bone, fallopian tube, pelvis, thymus, testis; most of them n=1) are not included. The percentages have therefore not been calculated; <sup>†</sup>CD8-inflamed was defined as CD8/Ki67 counts > 500 cells/mm<sup>2</sup> in the intraepithelial compartment with IE2 + IE3 ≥ 20%. CD8-excluded was defined as ≤ 500 cells/mm<sup>2</sup> in the intraepithelial and > 50 cells/mm<sup>2</sup> in the stromal compartment ITS0 + ITS1 ≥ 80% and ITS2 + ITS3 < 20%. CD8-desert was defined as ≤ 50 cells/mm<sup>2</sup> in the stromal compartment IE0 + IE1 ≥ 80% & IE2 + IE3 < 20% and ITS0 + ITS1 < 80% and ITS2 + ITS3 ≥ 20%; <sup>‡</sup>n=126 patients had prior therapy. ICI, immune checkpoint inhibitor.

**Table S6** List of differentially expressed signatures for liver metastases versus non-liver metastases in CD8 desert cases.

Tab 1: vsLung

| PARAM                                    | NGenes | Direction | PValue      | FDR         | CONTR  |
|------------------------------------------|--------|-----------|-------------|-------------|--------|
| HALLMARK_OXIDATIVE_PHOSPHORYLATION       | 183    | Up        | 5.29797E-20 | 2.64899E-18 | vsLung |
| HALLMARK_MYC_TARGETS_V1                  | 193    | Up        | 2.07603E-17 | 5.19008E-16 | vsLung |
| HALLMARK_MTORC1_SIGNALING                | 194    | Up        | 2.53074E-14 | 4.21791E-13 | vsLung |
| HALLMARK_XENOBIOTIC_METABOLISM           | 193    | Up        | 5.2497E-14  | 6.56212E-13 | vsLung |
| HALLMARK_FATTY_ACID_METABOLISM           | 153    | Up        | 9.68991E-12 | 9.68991E-11 | vsLung |
| HALLMARK_E2F_TARGETS                     | 198    | Up        | 6.35228E-10 | 5.29357E-09 | vsLung |
| HALLMARK_MYC_TARGETS_V2                  | 58     | Up        | 2.61145E-08 | 1.86532E-07 | vsLung |
| HALLMARK_G2M_CHECKPOINT                  | 194    | Up        | 6.23014E-07 | 3.89384E-06 | vsLung |
| HALLMARK_ADIPOGENESIS                    | 190    | Up        | 2.13141E-06 | 1.18412E-05 | vsLung |
| HALLMARK_GLYCOLYSIS                      | 193    | Up        | 2.47952E-06 | 1.23976E-05 | vsLung |
| HALLMARK_COAGULATION                     | 136    | Up        | 3.65624E-06 | 1.66193E-05 | vsLung |
| HALLMARK_PEROXISOME                      | 103    | Up        | 1.30891E-05 | 5.45381E-05 | vsLung |
| HALLMARK_REACTIVE_OXYGEN_SPECIES_PATHWAY | 48     | Up        | 1.58207E-05 | 5.72921E-05 | vsLung |
| HALLMARK_CHOLESTEROL_HOMEOSTASIS         | 73     | Up        | 1.60418E-05 | 5.72921E-05 | vsLung |
| HALLMARK_BILE_ACID_METABOLISM            | 108    | Up        | 2.05979E-05 | 6.86597E-05 | vsLung |
| HALLMARK_UNFOLDED_PROTEIN_RESPONSE       | 107    | Up        | 2.27508E-05 | 7.10963E-05 | vsLung |
| HALLMARK_DNA_REPAIR                      | 146    | Up        | 2.60633E-05 | 7.66567E-05 | vsLung |
| HALLMARK_UV_RESPONSE_UP                  | 151    | Up        | 0.000680999 | 0.001891663 | vsLung |
| HALLMARK_ANDROGEN_RESPONSE               | 96     | Up        | 0.000915482 | 0.002409163 | vsLung |
| HALLMARK_PI3K_AKT_MTOR_SIGNALING         | 100    | Up        | 0.002518784 | 0.00629696  | vsLung |
| HALLMARK_PROTEIN_SECRETION               | 95     | Up        | 0.003359014 | 0.007997653 | vsLung |
| HALLMARK_ESTROGEN_RESPONSE_LATE          | 194    | Up        | 0.003580711 | 0.008137979 | vsLung |
| HALLMARK_COMPLEMENT                      | 198    | Up        | 0.010338978 | 0.022476039 | vsLung |
| Pneumocyte                               | 6      | Down      | 6.65243E-10 | 6.45286E-08 | vsLung |
| Mast                                     | 5      | Down      | 6.8812E-06  | 0.000333738 | vsLung |
| Blymphocyte                              | 7      | Down      | 3.34642E-05 | 0.00108201  | vsLung |
| Club                                     | 3      | Down      | 7.43445E-05 | 0.001802854 | vsLung |
| IgAPlasma                                | 3      | Down      | 0.00010602  | 0.002056789 | vsLung |
| Pericyte                                 | 5      | Down      | 0.0002129   | 0.003441882 | vsLung |
| VesselEndothelial                        | 6      | Down      | 0.000309532 | 0.00428923  | vsLung |
| Epithelial                               | 11     | Up        | 0.000413257 | 0.005010741 | vsLung |
| Plasma                                   | 6      | Down      | 0.000503143 | 0.005422764 | vsLung |
| Hepatocyte                               | 5      | Up        | 0.00061491  | 0.005964626 | vsLung |
| IgMPlasma                                | 3      | Down      | 0.001146373 | 0.010108924 | vsLung |
| NaiBcell                                 | 5      | Down      | 0.003129749 | 0.025298802 | vsLung |
| Basophil                                 | 4      | Down      | 0.003939702 | 0.029396238 | vsLung |
| Bcell                                    | 3      | Down      | 0.005466112 | 0.037872346 | vsLung |
| Myofibroblast                            | 3      | Down      | 0.007542269 | 0.046582541 | vsLung |
| Cholangiocyte                            | 12     | Up        | 0.007683718 | 0.046582541 | vsLung |



**Table S6** List of differentially expressed signatures for liver metastases versus non-liver metastases in CD8 desert cases.

Tab 2: vsLN

| PARAM                                      | NGenes | Direction | PValue      | FDR         | CONTR |
|--------------------------------------------|--------|-----------|-------------|-------------|-------|
| HALLMARK_XENOBIOTIC_METABOLISM             | 193    | Up        | 1.1998E-10  | 5.999E-09   | vsLN  |
| HALLMARK_BILE_ACID_METABOLISM              | 108    | Up        | 6.03821E-10 | 1.50955E-08 | vsLN  |
| HALLMARK_INTERFERON_GAMMA_RESPONSE         | 195    | Down      | 3.80885E-07 | 6.34808E-06 | vsLN  |
| HALLMARK_E2F_TARGETS                       | 198    | Down      | 2.01697E-06 | 2.52121E-05 | vsLN  |
| HALLMARK_EPITHELIAL_MESENCHYMAL_TRANSITION | 198    | Down      | 5.80368E-06 | 5.80368E-05 | vsLN  |
| HALLMARK_ALLOGRAFT_REJECTION               | 183    | Down      | 1.11418E-05 | 9.28482E-05 | vsLN  |
| HALLMARK_INTERFERON_ALPHA_RESPONSE         | 93     | Down      | 2.83158E-05 | 0.000202256 | vsLN  |
| HALLMARK_FATTY_ACID_METABOLISM             | 153    | Up        | 3.73972E-05 | 0.000233732 | vsLN  |
| HALLMARK_G2M_CHECKPOINT                    | 194    | Down      | 8.29401E-05 | 0.000460778 | vsLN  |
| HALLMARK_COAGULATION                       | 136    | Up        | 0.000196586 | 0.000982932 | vsLN  |
| HALLMARK_MYC_TARGETS_V1                    | 193    | Down      | 0.002628181 | 0.011946278 | vsLN  |
| HALLMARK_PEROXISOME                        | 103    | Up        | 0.006018204 | 0.023863423 | vsLN  |
| HALLMARK_INFLAMMATORY_RESPONSE             | 187    | Down      | 0.00620449  | 0.023863423 | vsLN  |
| HALLMARK_APICAL_JUNCTION                   | 196    | Down      | 0.006810789 | 0.024324247 | vsLN  |
| HALLMARK_OXIDATIVE_PHOSPHORYLATION         | 183    | Up        | 0.01251607  | 0.041720233 | vsLN  |

|                   |    |      |             |             |      |
|-------------------|----|------|-------------|-------------|------|
| Blymphocyte       | 7  | Down | 4.45571E-06 | 0.000432203 | vsLN |
| cDC_CCR7          | 7  | Down | 2.53191E-05 | 0.001227977 | vsLN |
| Hepatocyte        | 5  | Up   | 5.02315E-05 | 0.001624153 | vsLN |
| VesselEndothelial | 6  | Down | 8.60807E-05 | 0.002087458 | vsLN |
| MemBcell          | 4  | Down | 0.000258494 | 0.005014788 | vsLN |
| Macrophage_CXCL9  | 4  | Down | 0.000628326 | 0.008624754 | vsLN |
| Basal             | 2  | Down | 0.00066854  | 0.008624754 | vsLN |
| Plasma            | 6  | Down | 0.00071132  | 0.008624754 | vsLN |
| IgGPlasma         | 5  | Down | 0.000888183 | 0.009572644 | vsLN |
| ExhCD8Tcell       | 24 | Down | 0.001114771 | 0.010207172 | vsLN |
| Hematopoietic     | 7  | Down | 0.00121685  | 0.010207172 | vsLN |
| Enterocyte        | 3  | Up   | 0.001262743 | 0.010207172 | vsLN |
| IgMPlasma         | 3  | Down | 0.00181662  | 0.013554779 | vsLN |
| Goblet            | 6  | Up   | 0.002238266 | 0.015507985 | vsLN |
| Bcell             | 3  | Down | 0.005305731 | 0.034310392 | vsLN |
| PancreaticAcinar  | 6  | Up   | 0.006023674 | 0.036518526 | vsLN |
| ILC2              | 6  | Down | 0.006830003 | 0.038971192 | vsLN |
| CommonLymphoidPC  | 2  | Down | 0.007952052 | 0.042852727 | vsLN |

**Table S6** List of differentially expressed signatures for liver metastases versus non-liver metastases in CD8 desert cases.

Tab 3: vsPrimary

| PARAM                                      | NGenes | Direction | PValue      | FDR         | CONTR     |
|--------------------------------------------|--------|-----------|-------------|-------------|-----------|
| HALLMARK_XENOBIOTIC_METABOLISM             | 193    | Up        | 3.2504E-13  | 1.6252E-11  | vsPrimary |
| HALLMARK_BILE_ACID_METABOLISM              | 108    | Up        | 1.84741E-09 | 4.61854E-08 | vsPrimary |
| HALLMARK_FATTY_ACID_METABOLISM             | 153    | Up        | 6.88829E-08 | 1.14805E-06 | vsPrimary |
| HALLMARK_INTERFERON_GAMMA_RESPONSE         | 195    | Down      | 5.36315E-07 | 6.70393E-06 | vsPrimary |
| HALLMARK_EPITHELIAL_MESENCHYMAL_TRANSITION | 198    | Down      | 1.10079E-06 | 1.10079E-05 | vsPrimary |
| HALLMARK_E2F_TARGETS                       | 198    | Up        | 2.45701E-06 | 2.04751E-05 | vsPrimary |
| HALLMARK_INTERFERON_ALPHA_RESPONSE         | 93     | Down      | 3.57717E-06 | 2.55512E-05 | vsPrimary |
| HALLMARK_ALLOGRAFT_REJECTION               | 183    | Down      | 6.17865E-06 | 3.86166E-05 | vsPrimary |
| HALLMARK_CHOLESTEROL_HOMEOSTASIS           | 73     | Up        | 1.12708E-05 | 6.26154E-05 | vsPrimary |
| HALLMARK_OXIDATIVE_PHOSPHORYLATION         | 183    | Up        | 1.45781E-05 | 7.28907E-05 | vsPrimary |
| HALLMARK_INFLAMMATORY_RESPONSE             | 187    | Down      | 3.10996E-05 | 0.000141362 | vsPrimary |
| HALLMARK_G2M_CHECKPOINT                    | 194    | Up        | 4.66437E-05 | 0.000194349 | vsPrimary |
| HALLMARK_PEROXISOME                        | 103    | Up        | 7.76978E-05 | 0.000298838 | vsPrimary |
| HALLMARK_MYC_TARGETS_V2                    | 58     | Up        | 0.000252275 | 0.00090098  | vsPrimary |
| HALLMARK_IL6_JAK_STAT3_SIGNALING           | 83     | Down      | 0.000545846 | 0.001819487 | vsPrimary |
| HALLMARK_MYC_TARGETS_V1                    | 193    | Up        | 0.001461525 | 0.004567264 | vsPrimary |
| HALLMARK_ADIPOGENESIS                      | 190    | Up        | 0.002141868 | 0.006299612 | vsPrimary |
| HALLMARK_TNFA_SIGNALING_VIA_NFKB           | 193    | Down      | 0.002448001 | 0.006800004 | vsPrimary |
| HALLMARK_MTORC1_SIGNALING                  | 194    | Up        | 0.004772936 | 0.01223149  | vsPrimary |
| HALLMARK_COAGULATION                       | 136    | Up        | 0.004892596 | 0.01223149  | vsPrimary |
| HALLMARK_UV_RESPONSE_DN                    | 141    | Down      | 0.010917446 | 0.025993919 | vsPrimary |
| HALLMARK_DNA_REPAIR                        | 146    | Up        | 0.014725578 | 0.033467222 | vsPrimary |
| Hepatocyte                                 | 5      | Up        | 3.8729E-05  | 0.003756709 | vsPrimary |
| Mast                                       | 5      | Down      | 9.15407E-05 | 0.004439723 | vsPrimary |
| Hematopoietic                              | 7      | Down      | 0.001314684 | 0.037449941 | vsPrimary |
| ExhCD8Tcell                                | 24     | Down      | 0.001544327 | 0.037449941 | vsPrimary |
| VesselEndothelial                          | 6      | Down      | 0.002009333 | 0.038981067 | vsPrimary |
| Chondrocyte                                | 8      | Down      | 0.002620403 | 0.04236318  | vsPrimary |

**Table S6** List of differentially expressed signatures for liver metastases versus non-liver metastases in CD8 desert cases.

*Tab 4: Contrasts*

| Coefficient | vsLung | vsLN | vsPrimary |
|-------------|--------|------|-----------|
| Liver.Mets  | 1      | 1    | 1         |
| LN.Mets     | 0      | -1   | 0         |
| Lung.Mets   | -1     | 0    | 0         |
| Primary     | 0      | 0    | -1        |

**Table S7** Overview of the top genes identified from the machine-learning approach.

| Name    | Desert | Excluded | Inflamed | Tissue_sc_summary                            |
|---------|--------|----------|----------|----------------------------------------------|
| IDO1    |        |          | up       | cDC_(endothelial)                            |
| ITGAE   |        |          | up       | cytotox_enriched                             |
| LAG3    |        |          | up       | CD8T                                         |
| PSMB8   |        |          | up       | broad_immunecor                              |
| PSMB9   |        |          | up       | broad_immunecor                              |
| UBE2L6  |        |          | up       | broad_immunecor                              |
| CD8A    | down   |          |          | CD8T                                         |
| CXCL9   | down   |          |          | macrophage_cDC_(inflam_fibroblast)           |
| MYO7A   |        |          | up       | immune_CD8high_macrophagehigh_also_nonimmune |
| MOV10   |        |          | up       | broad                                        |
| HIRA    |        | down     |          | broad                                        |
| PGBD4   |        | down     |          | broad                                        |
| ADSL    | down   |          |          | broad                                        |
| GBE1    |        | down     |          | malignant_enriched_noTcell                   |
| ARRDC4  | up     |          |          | broad_noTcell                                |
| SLC45A4 |        | down     |          | no_immune                                    |
| FANK1   |        | up       |          | Treg_malignant                               |
| LAMP5   |        |          | down     | pDC_fibroblast                               |
| SLC2A10 |        |          | down     | fibroblast_enriched_no_immune                |
| MMRN1   |        | up       |          | endothelial_no_immune                        |
| TFAP2A  | down   |          | up       | malignant_enriched_no_immune                 |
| NKD1    | up     |          |          | CRC_fibroblast_enriched_no_immune            |
| S100A13 | down   |          |          | no_immune                                    |
